# Supplementary material
Source: Research Square preprint supplement (doi:10.21203/rs.3.rs-9930475/v1)
Supplement: Supplementary file 1 [file 2b3665745049dbe6b2a793e7.xlsx]

## Sheet: all_symptoms_results
Sheet	Group	Variable	Comparison	Measure_Type	N	Participants	Baseline_Mean	Followup_Mean	Mean_Delta	Percent_Change	Delta_of_Delta	T_statistic	P_value_one_tailed	Cohens_d	Cohens_d_95%CI_Lower	Cohens_d_95%CI_Upper	Hypothesis	Significant	Treatment_Advantage	Significant_Advantage	Interpretation
PGI	Treatment	Aggression	ENDPT1 vs Baseline	PGI (Higher is better)	3	['PH003', 'PH006', 'PH009']	3.333	0.667	-2.667	20	0.542	0.6257	0.287938	0.571	-2.39	3.533	Treatment ratio > Placebo ratio (PGI: Higher is better)	FALSE	TRUE	FALSE	Non-significant treatment advantage
PGI	Placebo	Aggression	ENDPT1 vs Baseline	PGI (Higher is better)	2	['PH002', 'PH005']	2.5	0.5	-2	20	0.542	0.6257	0.287938	0.571	-2.39	3.533	Treatment ratio > Placebo ratio (PGI: Higher is better)	FALSE	TRUE	FALSE	Non-significant treatment advantage
PGI	Treatment	Aggression	ENDPT2 vs Baseline	PGI (Higher is better)	3	['PH003', 'PH006', 'PH009']	3.333	1	-2.333	30	1	0.7746	0.247513	0.707	-2.284	3.698	Treatment ratio > Placebo ratio (PGI: Higher is better)	FALSE	TRUE	FALSE	Non-significant treatment advantage
PGI	Placebo	Aggression	ENDPT2 vs Baseline	PGI (Higher is better)	2	['PH002', 'PH005']	2.5	0	-2.5	0	1	0.7746	0.247513	0.707	-2.284	3.698	Treatment ratio > Placebo ratio (PGI: Higher is better)	FALSE	TRUE	FALSE	Non-significant treatment advantage
PGI	Treatment	Aggression	ENDPT3 vs Baseline	PGI (Higher is better)	3	['PH003', 'PH006', 'PH009']	3.333	1.833	-1.5	55	1.069	0.9144	0.213976	0.835	-2.189	3.859	Treatment ratio > Placebo ratio (PGI: Higher is better)	FALSE	TRUE	FALSE	Non-significant treatment advantage
PGI	Placebo	Aggression	ENDPT3 vs Baseline	PGI (Higher is better)	2	['PH002', 'PH005']	2.5	0.5	-2	20	1.069	0.9144	0.213976	0.835	-2.189	3.859	Treatment ratio > Placebo ratio (PGI: Higher is better)	FALSE	TRUE	FALSE	Non-significant treatment advantage
PGI	Treatment	Anxiety	ENDPT1 vs Baseline	PGI (Higher is better)	3	['PH003', 'PH006', 'PH009']	5.333	0.667	-4.667	12.5	0	0	0.5	0	-2.267	2.267	Treatment ratio > Placebo ratio (PGI: Higher is better)	FALSE	FALSE	FALSE	Non-significant no meaningful difference
PGI	Placebo	Anxiety	ENDPT1 vs Baseline	PGI (Higher is better)	3	['PH002', 'PH004', 'PH005']	4	0.667	-3.333	16.7	0	0	0.5	0	-2.267	2.267	Treatment ratio > Placebo ratio (PGI: Higher is better)	FALSE	FALSE	FALSE	Non-significant no meaningful difference
PGI	Treatment	Anxiety	ENDPT2 vs Baseline	PGI (Higher is better)	3	['PH003', 'PH006', 'PH009']	5.333	0.667	-4.667	12.5	0	0	0.5	0	-2.267	2.267	Treatment ratio > Placebo ratio (PGI: Higher is better)	FALSE	FALSE	FALSE	Non-significant no meaningful difference
PGI	Placebo	Anxiety	ENDPT2 vs Baseline	PGI (Higher is better)	3	['PH002', 'PH004', 'PH005']	4	0.667	-3.333	16.7	0	0	0.5	0	-2.267	2.267	Treatment ratio > Placebo ratio (PGI: Higher is better)	FALSE	FALSE	FALSE	Non-significant no meaningful difference
PGI	Treatment	Anxiety	ENDPT3 vs Baseline	PGI (Higher is better)	3	['PH003', 'PH006', 'PH009']	5.333	1.5	-3.833	28.1	-0.083	-0.3519	0.628664	-0.287	-2.566	1.991	Treatment ratio > Placebo ratio (PGI: Higher is better)	FALSE	FALSE	FALSE	Non-significant placebo advantage
PGI	Placebo	Anxiety	ENDPT3 vs Baseline	PGI (Higher is better)	3	['PH002', 'PH004', 'PH005']	4	1.333	-2.667	33.3	-0.083	-0.3519	0.628664	-0.287	-2.566	1.991	Treatment ratio > Placebo ratio (PGI: Higher is better)	FALSE	FALSE	FALSE	Non-significant placebo advantage
PGI	Treatment	Ataxia (lack of communication between brain and body)	ENDPT1 vs Baseline	PGI (Higher is better)	3	['PH003', 'PH006', 'PH009']	4.667	0.667	-4	14.3	0.111	0.6325	0.280719	0.516	-1.788	2.821	Treatment ratio > Placebo ratio (PGI: Higher is better)	FALSE	TRUE	FALSE	Non-significant treatment advantage
PGI	Placebo	Ataxia (lack of communication between brain and body)	ENDPT1 vs Baseline	PGI (Higher is better)	3	['PH002', 'PH004', 'PH005']	5.667	0.333	-5.333	5.9	0.111	0.6325	0.280719	0.516	-1.788	2.821	Treatment ratio > Placebo ratio (PGI: Higher is better)	FALSE	TRUE	FALSE	Non-significant treatment advantage
PGI	Treatment	Ataxia (lack of communication between brain and body)	ENDPT2 vs Baseline	PGI (Higher is better)	3	['PH003', 'PH006', 'PH009']	4.667	0.667	-4	14.3	0.044	0.25	0.407451	0.204	-2.069	2.477	Treatment ratio > Placebo ratio (PGI: Higher is better)	FALSE	TRUE	FALSE	Non-significant treatment advantage
PGI	Placebo	Ataxia (lack of communication between brain and body)	ENDPT2 vs Baseline	PGI (Higher is better)	3	['PH002', 'PH004', 'PH005']	5.667	0.667	-5	11.8	0.044	0.25	0.407451	0.204	-2.069	2.477	Treatment ratio > Placebo ratio (PGI: Higher is better)	FALSE	TRUE	FALSE	Non-significant treatment advantage
PGI	Treatment	Ataxia (lack of communication between brain and body)	ENDPT3 vs Baseline	PGI (Higher is better)	3	['PH003', 'PH006', 'PH009']	4.667	1.167	-3.5	25	0.194	1.2572	0.138535	1.027	-1.385	3.438	Treatment ratio > Placebo ratio (PGI: Higher is better)	FALSE	TRUE	FALSE	Non-significant treatment advantage
PGI	Placebo	Ataxia (lack of communication between brain and body)	ENDPT3 vs Baseline	PGI (Higher is better)	3	['PH002', 'PH004', 'PH005']	5.667	0.333	-5.333	5.9	0.194	1.2572	0.138535	1.027	-1.385	3.438	Treatment ratio > Placebo ratio (PGI: Higher is better)	FALSE	TRUE	FALSE	Non-significant treatment advantage
PGI	Treatment	Attention/Focus	ENDPT1 vs Baseline	PGI (Higher is better)	3	['PH003', 'PH006', 'PH009']	4.667	1	-3.667	21.4	0.222	0.6937	0.263028	0.566	-1.746	2.878	Treatment ratio > Placebo ratio (PGI: Higher is better)	FALSE	TRUE	FALSE	Non-significant treatment advantage
PGI	Placebo	Attention/Focus	ENDPT1 vs Baseline	PGI (Higher is better)	3	['PH002', 'PH004', 'PH005']	4	0.667	-3.333	16.7	0.222	0.6937	0.263028	0.566	-1.746	2.878	Treatment ratio > Placebo ratio (PGI: Higher is better)	FALSE	TRUE	FALSE	Non-significant treatment advantage
PGI	Treatment	Attention/Focus	ENDPT2 vs Baseline	PGI (Higher is better)	3	['PH003', 'PH006', 'PH009']	4.667	0.667	-4	14.3	0.167	0.4851	0.326497	0.396	-1.893	2.685	Treatment ratio > Placebo ratio (PGI: Higher is better)	FALSE	TRUE	FALSE	Non-significant treatment advantage
PGI	Placebo	Attention/Focus	ENDPT2 vs Baseline	PGI (Higher is better)	3	['PH002', 'PH004', 'PH005']	4	0.667	-3.333	16.7	0.167	0.4851	0.326497	0.396	-1.893	2.685	Treatment ratio > Placebo ratio (PGI: Higher is better)	FALSE	TRUE	FALSE	Non-significant treatment advantage
PGI	Treatment	Attention/Focus	ENDPT3 vs Baseline	PGI (Higher is better)	3	['PH003', 'PH006', 'PH009']	4.667	1	-3.667	21.4	0.222	0.6937	0.263028	0.566	-1.746	2.878	Treatment ratio > Placebo ratio (PGI: Higher is better)	FALSE	TRUE	FALSE	Non-significant treatment advantage
PGI	Placebo	Attention/Focus	ENDPT3 vs Baseline	PGI (Higher is better)	3	['PH002', 'PH004', 'PH005']	4	0.667	-3.333	16.7	0.222	0.6937	0.263028	0.566	-1.746	2.878	Treatment ratio > Placebo ratio (PGI: Higher is better)	FALSE	TRUE	FALSE	Non-significant treatment advantage
PGI	Treatment	Average of all symptoms	ENDPT1 vs Baseline	PGI (Higher is better)	3	['PH003', 'PH006', 'PH009']	3.92	0.703	-3.216	17.9	0.114	0.5945	0.292079	0.485	-1.815	2.786	Treatment ratio > Placebo ratio (PGI: Higher is better)	FALSE	TRUE	FALSE	Non-significant treatment advantage
PGI	Placebo	Average of all symptoms	ENDPT1 vs Baseline	PGI (Higher is better)	3	['PH002', 'PH004', 'PH005']	3.356	0.324	-3.032	9.6	0.114	0.5945	0.292079	0.485	-1.815	2.786	Treatment ratio > Placebo ratio (PGI: Higher is better)	FALSE	TRUE	FALSE	Non-significant treatment advantage
PGI	Treatment	Average of all symptoms	ENDPT2 vs Baseline	PGI (Higher is better)	3	['PH003', 'PH006', 'PH009']	3.92	0.879	-3.041	22.4	0.12	0.5849	0.295005	0.478	-1.821	2.777	Treatment ratio > Placebo ratio (PGI: Higher is better)	FALSE	TRUE	FALSE	Non-significant treatment advantage
PGI	Placebo	Average of all symptoms	ENDPT2 vs Baseline	PGI (Higher is better)	3	['PH002', 'PH004', 'PH005']	3.356	0.45	-2.907	13.4	0.12	0.5849	0.295005	0.478	-1.821	2.777	Treatment ratio > Placebo ratio (PGI: Higher is better)	FALSE	TRUE	FALSE	Non-significant treatment advantage
PGI	Treatment	Average of all symptoms	ENDPT3 vs Baseline	PGI (Higher is better)	3	['PH003', 'PH006', 'PH009']	3.92	1.265	-2.654	32.3	0.134	0.6938	0.262984	0.567	-1.745	2.879	Treatment ratio > Placebo ratio (PGI: Higher is better)	FALSE	TRUE	FALSE	Non-significant treatment advantage
PGI	Placebo	Average of all symptoms	ENDPT3 vs Baseline	PGI (Higher is better)	3	['PH002', 'PH004', 'PH005']	3.356	0.691	-2.666	20.6	0.134	0.6938	0.262984	0.567	-1.745	2.879	Treatment ratio > Placebo ratio (PGI: Higher is better)	FALSE	TRUE	FALSE	Non-significant treatment advantage
PGI	Treatment	Cognition/Thinking	ENDPT1 vs Baseline	PGI (Higher is better)	3	['PH003', 'PH006', 'PH009']	6	0.667	-5.333	11.1	0	0	0.5	0	-2.267	2.267	Treatment ratio > Placebo ratio (PGI: Higher is better)	FALSE	FALSE	FALSE	Non-significant no meaningful difference
PGI	Placebo	Cognition/Thinking	ENDPT1 vs Baseline	PGI (Higher is better)	3	['PH002', 'PH004', 'PH005']	3.667	0.333	-3.333	9.1	0	0	0.5	0	-2.267	2.267	Treatment ratio > Placebo ratio (PGI: Higher is better)	FALSE	FALSE	FALSE	Non-significant no meaningful difference
PGI	Treatment	Cognition/Thinking	ENDPT2 vs Baseline	PGI (Higher is better)	3	['PH003', 'PH006', 'PH009']	6	0.667	-5.333	11.1	0	0	0.5	0	-2.267	2.267	Treatment ratio > Placebo ratio (PGI: Higher is better)	FALSE	FALSE	FALSE	Non-significant no meaningful difference
PGI	Placebo	Cognition/Thinking	ENDPT2 vs Baseline	PGI (Higher is better)	3	['PH002', 'PH004', 'PH005']	3.667	0.333	-3.333	9.1	0	0	0.5	0	-2.267	2.267	Treatment ratio > Placebo ratio (PGI: Higher is better)	FALSE	FALSE	FALSE	Non-significant no meaningful difference
PGI	Treatment	Cognition/Thinking	ENDPT3 vs Baseline	PGI (Higher is better)	3	['PH003', 'PH006', 'PH009']	6	1	-5	16.7	0.056	0.378	0.362329	0.309	-1.972	2.589	Treatment ratio > Placebo ratio (PGI: Higher is better)	FALSE	TRUE	FALSE	Non-significant treatment advantage
PGI	Placebo	Cognition/Thinking	ENDPT3 vs Baseline	PGI (Higher is better)	3	['PH002', 'PH004', 'PH005']	3.667	0.333	-3.333	9.1	0.056	0.378	0.362329	0.309	-1.972	2.589	Treatment ratio > Placebo ratio (PGI: Higher is better)	FALSE	TRUE	FALSE	Non-significant treatment advantage
PGI	Treatment	Environmental Allergies	ENDPT1 vs Baseline	PGI (Higher is better)	3	['PH003', 'PH006', 'PH009']	2.333	0.333	-2	14.3	0.167	1	0.18695	0.816	-1.543	3.176	Treatment ratio > Placebo ratio (PGI: Higher is better)	FALSE	TRUE	FALSE	Non-significant treatment advantage
PGI	Placebo	Environmental Allergies	ENDPT1 vs Baseline	PGI (Higher is better)	3	['PH002', 'PH004', 'PH005']	2.667	0	-2.667	0	0.167	1	0.18695	0.816	-1.543	3.176	Treatment ratio > Placebo ratio (PGI: Higher is better)	FALSE	TRUE	FALSE	Non-significant treatment advantage
PGI	Treatment	Environmental Allergies	ENDPT2 vs Baseline	PGI (Higher is better)	3	['PH003', 'PH006', 'PH009']	2.333	0	-2.333	0	0			0	-2.267	2.267	Treatment ratio > Placebo ratio (PGI: Higher is better)	FALSE	FALSE	FALSE	Non-significant no meaningful difference
PGI	Placebo	Environmental Allergies	ENDPT2 vs Baseline	PGI (Higher is better)	3	['PH002', 'PH004', 'PH005']	2.667	0	-2.667	0	0			0	-2.267	2.267	Treatment ratio > Placebo ratio (PGI: Higher is better)	FALSE	FALSE	FALSE	Non-significant no meaningful difference
PGI	Treatment	Environmental Allergies	ENDPT3 vs Baseline	PGI (Higher is better)	3	['PH003', 'PH006', 'PH009']	2.333	0	-2.333	0	-0.167	-1	0.81305	-0.816	-3.176	1.543	Treatment ratio > Placebo ratio (PGI: Higher is better)	FALSE	FALSE	FALSE	Non-significant placebo advantage
PGI	Placebo	Environmental Allergies	ENDPT3 vs Baseline	PGI (Higher is better)	3	['PH002', 'PH004', 'PH005']	2.667	0.667	-2	25	-0.167	-1	0.81305	-0.816	-3.176	1.543	Treatment ratio > Placebo ratio (PGI: Higher is better)	FALSE	FALSE	FALSE	Non-significant placebo advantage
PGI	Treatment	Expressive Language/Speech	ENDPT1 vs Baseline	PGI (Higher is better)	3	['PH003', 'PH006', 'PH009']	5.667	0.667	-5	11.8	0.111	2	0.058058	1.633	-0.985	4.251	Treatment ratio > Placebo ratio (PGI: Higher is better)	FALSE	TRUE	FALSE	Non-significant treatment advantage
PGI	Placebo	Expressive Language/Speech	ENDPT1 vs Baseline	PGI (Higher is better)	3	['PH002', 'PH004', 'PH005']	6	0	-6	0	0.111	2	0.058058	1.633	-0.985	4.251	Treatment ratio > Placebo ratio (PGI: Higher is better)	FALSE	TRUE	FALSE	Non-significant treatment advantage
PGI	Treatment	Expressive Language/Speech	ENDPT2 vs Baseline	PGI (Higher is better)	3	['PH003', 'PH006', 'PH009']	5.667	1.5	-4.167	26.5	0.25	1.964	0.060502	1.604	-1.002	4.21	Treatment ratio > Placebo ratio (PGI: Higher is better)	FALSE	TRUE	FALSE	Non-significant treatment advantage
PGI	Placebo	Expressive Language/Speech	ENDPT2 vs Baseline	PGI (Higher is better)	3	['PH002', 'PH004', 'PH005']	6	0	-6	0	0.25	1.964	0.060502	1.604	-1.002	4.21	Treatment ratio > Placebo ratio (PGI: Higher is better)	FALSE	TRUE	FALSE	Non-significant treatment advantage
PGI	Treatment	Expressive Language/Speech	ENDPT3 vs Baseline	PGI (Higher is better)	3	['PH003', 'PH006', 'PH009']	5.667	1.667	-4	29.4	0.278	1.8898	0.065889	1.543	-1.039	4.125	Treatment ratio > Placebo ratio (PGI: Higher is better)	FALSE	TRUE	FALSE	Non-significant treatment advantage
PGI	Placebo	Expressive Language/Speech	ENDPT3 vs Baseline	PGI (Higher is better)	3	['PH002', 'PH004', 'PH005']	6	0	-6	0	0.278	1.8898	0.065889	1.543	-1.039	4.125	Treatment ratio > Placebo ratio (PGI: Higher is better)	FALSE	TRUE	FALSE	Non-significant treatment advantage
PGI	Treatment	Eye Contact	ENDPT1 vs Baseline	PGI (Higher is better)	3	['PH003', 'PH006', 'PH009']	3.333	1	-2.333	30	0.222	1.0505	0.176392	0.858	-1.511	3.227	Treatment ratio > Placebo ratio (PGI: Higher is better)	FALSE	TRUE	FALSE	Non-significant treatment advantage
PGI	Placebo	Eye Contact	ENDPT1 vs Baseline	PGI (Higher is better)	3	['PH002', 'PH004', 'PH005']	3.667	0.333	-3.333	9.1	0.222	1.0505	0.176392	0.858	-1.511	3.227	Treatment ratio > Placebo ratio (PGI: Higher is better)	FALSE	TRUE	FALSE	Non-significant treatment advantage
PGI	Treatment	Eye Contact	ENDPT2 vs Baseline	PGI (Higher is better)	3	['PH003', 'PH006', 'PH009']	3.333	1	-2.333	30	0.222	0.6325	0.280719	0.516	-1.788	2.821	Treatment ratio > Placebo ratio (PGI: Higher is better)	FALSE	TRUE	FALSE	Non-significant treatment advantage
PGI	Placebo	Eye Contact	ENDPT2 vs Baseline	PGI (Higher is better)	3	['PH002', 'PH004', 'PH005']	3.667	0.333	-3.333	9.1	0.222	0.6325	0.280719	0.516	-1.788	2.821	Treatment ratio > Placebo ratio (PGI: Higher is better)	FALSE	TRUE	FALSE	Non-significant treatment advantage
PGI	Treatment	Eye Contact	ENDPT3 vs Baseline	PGI (Higher is better)	3	['PH003', 'PH006', 'PH009']	3.333	1.333	-2	40	0.194	0.5203	0.315161	0.425	-1.868	2.717	Treatment ratio > Placebo ratio (PGI: Higher is better)	FALSE	TRUE	FALSE	Non-significant treatment advantage
PGI	Placebo	Eye Contact	ENDPT3 vs Baseline	PGI (Higher is better)	3	['PH002', 'PH004', 'PH005']	3.667	0.667	-3	18.2	0.194	0.5203	0.315161	0.425	-1.868	2.717	Treatment ratio > Placebo ratio (PGI: Higher is better)	FALSE	TRUE	FALSE	Non-significant treatment advantage
PGI	Treatment	Fine Motor Skills	ENDPT1 vs Baseline	PGI (Higher is better)	3	['PH003', 'PH006', 'PH009']	5	0.667	-4.333	13.3	0.111	0.6325	0.280719	0.516	-1.788	2.821	Treatment ratio > Placebo ratio (PGI: Higher is better)	FALSE	TRUE	FALSE	Non-significant treatment advantage
PGI	Placebo	Fine Motor Skills	ENDPT1 vs Baseline	PGI (Higher is better)	3	['PH002', 'PH004', 'PH005']	5.667	0.333	-5.333	5.9	0.111	0.6325	0.280719	0.516	-1.788	2.821	Treatment ratio > Placebo ratio (PGI: Higher is better)	FALSE	TRUE	FALSE	Non-significant treatment advantage
PGI	Treatment	Fine Motor Skills	ENDPT2 vs Baseline	PGI (Higher is better)	3	['PH003', 'PH006', 'PH009']	5	1	-4	20	0.139	0.5423	0.308197	0.443	-1.852	2.737	Treatment ratio > Placebo ratio (PGI: Higher is better)	FALSE	TRUE	FALSE	Non-significant treatment advantage
PGI	Placebo	Fine Motor Skills	ENDPT2 vs Baseline	PGI (Higher is better)	3	['PH002', 'PH004', 'PH005']	5.667	0.667	-5	11.8	0.139	0.5423	0.308197	0.443	-1.852	2.737	Treatment ratio > Placebo ratio (PGI: Higher is better)	FALSE	TRUE	FALSE	Non-significant treatment advantage
PGI	Treatment	Fine Motor Skills	ENDPT3 vs Baseline	PGI (Higher is better)	3	['PH003', 'PH006', 'PH009']	5	1.5	-3.5	30	0.278	1.2217	0.144449	0.998	-1.406	3.401	Treatment ratio > Placebo ratio (PGI: Higher is better)	FALSE	TRUE	FALSE	Non-significant treatment advantage
PGI	Placebo	Fine Motor Skills	ENDPT3 vs Baseline	PGI (Higher is better)	3	['PH002', 'PH004', 'PH005']	5.667	0.333	-5.333	5.9	0.278	1.2217	0.144449	0.998	-1.406	3.401	Treatment ratio > Placebo ratio (PGI: Higher is better)	FALSE	TRUE	FALSE	Non-significant treatment advantage
PGI	Treatment	Flushing	ENDPT1 vs Baseline	PGI (Higher is better)	3	['PH003', 'PH006', 'PH009']	2	0	-2	0	0			0	-2.267	2.267	Treatment ratio > Placebo ratio (PGI: Higher is better)	FALSE	FALSE	FALSE	Non-significant no meaningful difference
PGI	Placebo	Flushing	ENDPT1 vs Baseline	PGI (Higher is better)	3	['PH002', 'PH004', 'PH005']	1.667	0	-1.667	0	0			0	-2.267	2.267	Treatment ratio > Placebo ratio (PGI: Higher is better)	FALSE	FALSE	FALSE	Non-significant no meaningful difference
PGI	Treatment	Flushing	ENDPT2 vs Baseline	PGI (Higher is better)	3	['PH003', 'PH006', 'PH009']	2	0	-2	0	-0.222	-1	0.81305	-0.816	-3.176	1.543	Treatment ratio > Placebo ratio (PGI: Higher is better)	FALSE	FALSE	FALSE	Non-significant placebo advantage
PGI	Placebo	Flushing	ENDPT2 vs Baseline	PGI (Higher is better)	3	['PH002', 'PH004', 'PH005']	1.667	0.667	-1	40	-0.222	-1	0.81305	-0.816	-3.176	1.543	Treatment ratio > Placebo ratio (PGI: Higher is better)	FALSE	FALSE	FALSE	Non-significant placebo advantage
PGI	Treatment	Flushing	ENDPT3 vs Baseline	PGI (Higher is better)	3	['PH003', 'PH006', 'PH009']	2	0	-2	0	-0.333	-1	0.81305	-0.816	-3.176	1.543	Treatment ratio > Placebo ratio (PGI: Higher is better)	FALSE	FALSE	FALSE	Non-significant placebo advantage
PGI	Placebo	Flushing	ENDPT3 vs Baseline	PGI (Higher is better)	3	['PH002', 'PH004', 'PH005']	1.667	1	-0.667	60	-0.333	-1	0.81305	-0.816	-3.176	1.543	Treatment ratio > Placebo ratio (PGI: Higher is better)	FALSE	FALSE	FALSE	Non-significant placebo advantage
PGI	Treatment	Gross Motor Skills	ENDPT1 vs Baseline	PGI (Higher is better)	3	['PH003', 'PH006', 'PH009']	4.667	0.333	-4.333	7.1	-0.028	-0.2	0.574381	-0.163	-2.434	2.107	Treatment ratio > Placebo ratio (PGI: Higher is better)	FALSE	FALSE	FALSE	Non-significant placebo advantage
PGI	Placebo	Gross Motor Skills	ENDPT1 vs Baseline	PGI (Higher is better)	3	['PH002', 'PH004', 'PH005']	5.667	0.667	-5	11.8	-0.028	-0.2	0.574381	-0.163	-2.434	2.107	Treatment ratio > Placebo ratio (PGI: Higher is better)	FALSE	FALSE	FALSE	Non-significant placebo advantage
PGI	Treatment	Gross Motor Skills	ENDPT2 vs Baseline	PGI (Higher is better)	3	['PH003', 'PH006', 'PH009']	4.667	0.667	-4	14.3	0	0	0.5	0	-2.267	2.267	Treatment ratio > Placebo ratio (PGI: Higher is better)	FALSE	FALSE	FALSE	Non-significant no meaningful difference
PGI	Placebo	Gross Motor Skills	ENDPT2 vs Baseline	PGI (Higher is better)	3	['PH002', 'PH004', 'PH005']	5.667	1	-4.667	17.6	0	0	0.5	0	-2.267	2.267	Treatment ratio > Placebo ratio (PGI: Higher is better)	FALSE	FALSE	FALSE	Non-significant no meaningful difference
PGI	Treatment	Gross Motor Skills	ENDPT3 vs Baseline	PGI (Higher is better)	3	['PH003', 'PH006', 'PH009']	4.667	1	-3.667	21.4	-0.011	-0.0714	0.526757	-0.058	-2.326	2.209	Treatment ratio > Placebo ratio (PGI: Higher is better)	FALSE	FALSE	FALSE	Non-significant placebo advantage
PGI	Placebo	Gross Motor Skills	ENDPT3 vs Baseline	PGI (Higher is better)	3	['PH002', 'PH004', 'PH005']	5.667	1.333	-4.333	23.5	-0.011	-0.0714	0.526757	-0.058	-2.326	2.209	Treatment ratio > Placebo ratio (PGI: Higher is better)	FALSE	FALSE	FALSE	Non-significant placebo advantage
PGI	Treatment	Hyperactivity	ENDPT1 vs Baseline	PGI (Higher is better)	3	['PH003', 'PH006', 'PH009']	4.667	0.667	-4	14.3	0	0	0.5	0	-2.267	2.267	Treatment ratio > Placebo ratio (PGI: Higher is better)	FALSE	FALSE	FALSE	Non-significant no meaningful difference
PGI	Placebo	Hyperactivity	ENDPT1 vs Baseline	PGI (Higher is better)	3	['PH002', 'PH004', 'PH005']	4	0.667	-3.333	16.7	0	0	0.5	0	-2.267	2.267	Treatment ratio > Placebo ratio (PGI: Higher is better)	FALSE	FALSE	FALSE	Non-significant no meaningful difference
PGI	Treatment	Hyperactivity	ENDPT2 vs Baseline	PGI (Higher is better)	3	['PH003', 'PH006', 'PH009']	4.667	0.667	-4	14.3	0.083	0.4472	0.338934	0.365	-1.921	2.651	Treatment ratio > Placebo ratio (PGI: Higher is better)	FALSE	TRUE	FALSE	Non-significant treatment advantage
PGI	Placebo	Hyperactivity	ENDPT2 vs Baseline	PGI (Higher is better)	3	['PH002', 'PH004', 'PH005']	4	0.333	-3.667	8.3	0.083	0.4472	0.338934	0.365	-1.921	2.651	Treatment ratio > Placebo ratio (PGI: Higher is better)	FALSE	TRUE	FALSE	Non-significant treatment advantage
PGI	Treatment	Hyperactivity	ENDPT3 vs Baseline	PGI (Higher is better)	3	['PH003', 'PH006', 'PH009']	4.667	0.667	-4	14.3	-0.067	-0.3015	0.610975	-0.246	-2.522	2.029	Treatment ratio > Placebo ratio (PGI: Higher is better)	FALSE	FALSE	FALSE	Non-significant placebo advantage
PGI	Placebo	Hyperactivity	ENDPT3 vs Baseline	PGI (Higher is better)	3	['PH002', 'PH004', 'PH005']	4	1	-3	25	-0.067	-0.3015	0.610975	-0.246	-2.522	2.029	Treatment ratio > Placebo ratio (PGI: Higher is better)	FALSE	FALSE	FALSE	Non-significant placebo advantage
PGI	Treatment	Hyperventilation	ENDPT1 vs Baseline	PGI (Higher is better)	3	['PH003', 'PH006', 'PH009']	3.333	1	-2.333	30	0.278	1.0742	0.180727	0.981	-2.088	4.049	Treatment ratio > Placebo ratio (PGI: Higher is better)	FALSE	TRUE	FALSE	Non-significant treatment advantage
PGI	Placebo	Hyperventilation	ENDPT1 vs Baseline	PGI (Higher is better)	2	['PH002', 'PH005']	1	0	-1	0	0.278	1.0742	0.180727	0.981	-2.088	4.049	Treatment ratio > Placebo ratio (PGI: Higher is better)	FALSE	TRUE	FALSE	Non-significant treatment advantage
PGI	Treatment	Hyperventilation	ENDPT2 vs Baseline	PGI (Higher is better)	3	['PH003', 'PH006', 'PH009']	3.333	0.833	-2.5	25	-0.25	-0.5427	0.687477	-0.495	-3.443	2.452	Treatment ratio > Placebo ratio (PGI: Higher is better)	FALSE	FALSE	FALSE	Non-significant placebo advantage
PGI	Placebo	Hyperventilation	ENDPT2 vs Baseline	PGI (Higher is better)	2	['PH002', 'PH005']	1	0.5	-0.5	50	-0.25	-0.5427	0.687477	-0.495	-3.443	2.452	Treatment ratio > Placebo ratio (PGI: Higher is better)	FALSE	FALSE	FALSE	Non-significant placebo advantage
PGI	Treatment	Hyperventilation	ENDPT3 vs Baseline	PGI (Higher is better)	3	['PH003', 'PH006', 'PH009']	3.333	1.167	-2.167	35	0.306	1.2172	0.155268	1.111	-2.002	4.224	Treatment ratio > Placebo ratio (PGI: Higher is better)	FALSE	TRUE	FALSE	Non-significant treatment advantage
PGI	Placebo	Hyperventilation	ENDPT3 vs Baseline	PGI (Higher is better)	2	['PH002', 'PH005']	1	0	-1	0	0.306	1.2172	0.155268	1.111	-2.002	4.224	Treatment ratio > Placebo ratio (PGI: Higher is better)	FALSE	TRUE	FALSE	Non-significant treatment advantage
PGI	Treatment	Irritability/Mood	ENDPT1 vs Baseline	PGI (Higher is better)	3	['PH003', 'PH006', 'PH009']	3.333	0.667	-2.667	20	0	0	0.5	0	-2.267	2.267	Treatment ratio > Placebo ratio (PGI: Higher is better)	FALSE	FALSE	FALSE	Non-significant no meaningful difference
PGI	Placebo	Irritability/Mood	ENDPT1 vs Baseline	PGI (Higher is better)	3	['PH002', 'PH004', 'PH005']	3.333	1	-2.333	30	0	0	0.5	0	-2.267	2.267	Treatment ratio > Placebo ratio (PGI: Higher is better)	FALSE	FALSE	FALSE	Non-significant no meaningful difference
PGI	Treatment	Irritability/Mood	ENDPT2 vs Baseline	PGI (Higher is better)	3	['PH003', 'PH006', 'PH009']	3.333	1.333	-2	40	0.456	0.8215	0.228757	0.671	-1.659	3.001	Treatment ratio > Placebo ratio (PGI: Higher is better)	FALSE	TRUE	FALSE	Non-significant treatment advantage
PGI	Placebo	Irritability/Mood	ENDPT2 vs Baseline	PGI (Higher is better)	3	['PH002', 'PH004', 'PH005']	3.333	0.333	-3	10	0.456	0.8215	0.228757	0.671	-1.659	3.001	Treatment ratio > Placebo ratio (PGI: Higher is better)	FALSE	TRUE	FALSE	Non-significant treatment advantage
PGI	Treatment	Irritability/Mood	ENDPT3 vs Baseline	PGI (Higher is better)	3	['PH003', 'PH006', 'PH009']	3.333	2.167	-1.167	65	0.4	0.9171	0.205499	0.749	-1.596	3.094	Treatment ratio > Placebo ratio (PGI: Higher is better)	FALSE	TRUE	FALSE	Non-significant treatment advantage
PGI	Placebo	Irritability/Mood	ENDPT3 vs Baseline	PGI (Higher is better)	3	['PH002', 'PH004', 'PH005']	3.333	1.333	-2	40	0.4	0.9171	0.205499	0.749	-1.596	3.094	Treatment ratio > Placebo ratio (PGI: Higher is better)	FALSE	TRUE	FALSE	Non-significant treatment advantage
PGI	Treatment	OVERALL Symptoms	ENDPT1 vs Baseline	PGI (Higher is better)	3	['PH003', 'PH006', 'PH009']	5.333	1	-4.333	18.8	0.078	0.4842	0.32678	0.395	-1.894	2.684	Treatment ratio > Placebo ratio (PGI: Higher is better)	FALSE	TRUE	FALSE	Non-significant treatment advantage
PGI	Placebo	OVERALL Symptoms	ENDPT1 vs Baseline	PGI (Higher is better)	3	['PH002', 'PH004', 'PH005']	5.667	0.667	-5	11.8	0.078	0.4842	0.32678	0.395	-1.894	2.684	Treatment ratio > Placebo ratio (PGI: Higher is better)	FALSE	TRUE	FALSE	Non-significant treatment advantage
PGI	Treatment	OVERALL Symptoms	ENDPT2 vs Baseline	PGI (Higher is better)	3	['PH003', 'PH006', 'PH009']	5.333	1.833	-3.5	34.4	0.239	1.7368	0.078717	1.418	-1.118	3.954	Treatment ratio > Placebo ratio (PGI: Higher is better)	FALSE	TRUE	FALSE	Non-significant treatment advantage
PGI	Placebo	OVERALL Symptoms	ENDPT2 vs Baseline	PGI (Higher is better)	3	['PH002', 'PH004', 'PH005']	5.667	0.667	-5	11.8	0.239	1.7368	0.078717	1.418	-1.118	3.954	Treatment ratio > Placebo ratio (PGI: Higher is better)	FALSE	TRUE	FALSE	Non-significant treatment advantage
PGI	Treatment	OVERALL Symptoms	ENDPT3 vs Baseline	PGI (Higher is better)	3	['PH003', 'PH006', 'PH009']	5.333	2.167	-3.167	40.6	0.239	1.5882	0.093714	1.297	-1.197	3.791	Treatment ratio > Placebo ratio (PGI: Higher is better)	FALSE	TRUE	FALSE	Non-significant treatment advantage
PGI	Placebo	OVERALL Symptoms	ENDPT3 vs Baseline	PGI (Higher is better)	3	['PH002', 'PH004', 'PH005']	5.667	1	-4.667	17.6	0.239	1.5882	0.093714	1.297	-1.197	3.791	Treatment ratio > Placebo ratio (PGI: Higher is better)	FALSE	TRUE	FALSE	Non-significant treatment advantage
PGI	Treatment	Play Skills	ENDPT1 vs Baseline	PGI (Higher is better)	3	['PH003', 'PH006', 'PH009']	4.667	0.667	-4	14.3	0.167	1	0.18695	0.816	-1.543	3.176	Treatment ratio > Placebo ratio (PGI: Higher is better)	FALSE	TRUE	FALSE	Non-significant treatment advantage
PGI	Placebo	Play Skills	ENDPT1 vs Baseline	PGI (Higher is better)	3	['PH002', 'PH004', 'PH005']	5.333	0	-5.333	0	0.167	1	0.18695	0.816	-1.543	3.176	Treatment ratio > Placebo ratio (PGI: Higher is better)	FALSE	TRUE	FALSE	Non-significant treatment advantage
PGI	Treatment	Play Skills	ENDPT2 vs Baseline	PGI (Higher is better)	3	['PH003', 'PH006', 'PH009']	4.667	0.667	-4	14.3	0.167	1	0.18695	0.816	-1.543	3.176	Treatment ratio > Placebo ratio (PGI: Higher is better)	FALSE	TRUE	FALSE	Non-significant treatment advantage
PGI	Placebo	Play Skills	ENDPT2 vs Baseline	PGI (Higher is better)	3	['PH002', 'PH004', 'PH005']	5.333	0	-5.333	0	0.167	1	0.18695	0.816	-1.543	3.176	Treatment ratio > Placebo ratio (PGI: Higher is better)	FALSE	TRUE	FALSE	Non-significant treatment advantage
PGI	Treatment	Play Skills	ENDPT3 vs Baseline	PGI (Higher is better)	3	['PH003', 'PH006', 'PH009']	4.667	0.667	-4	14.3	0.167	1	0.18695	0.816	-1.543	3.176	Treatment ratio > Placebo ratio (PGI: Higher is better)	FALSE	TRUE	FALSE	Non-significant treatment advantage
PGI	Placebo	Play Skills	ENDPT3 vs Baseline	PGI (Higher is better)	3	['PH002', 'PH004', 'PH005']	5.333	0	-5.333	0	0.167	1	0.18695	0.816	-1.543	3.176	Treatment ratio > Placebo ratio (PGI: Higher is better)	FALSE	TRUE	FALSE	Non-significant treatment advantage
PGI	Treatment	Receptive Language	ENDPT1 vs Baseline	PGI (Higher is better)	3	['PH003', 'PH006', 'PH009']	5.333	0.667	-4.667	12.5	-0.044	-0.25	0.592549	-0.204	-2.477	2.069	Treatment ratio > Placebo ratio (PGI: Higher is better)	FALSE	FALSE	FALSE	Non-significant placebo advantage
PGI	Placebo	Receptive Language	ENDPT1 vs Baseline	PGI (Higher is better)	3	['PH002', 'PH004', 'PH005']	3.333	0.667	-2.667	20	-0.044	-0.25	0.592549	-0.204	-2.477	2.069	Treatment ratio > Placebo ratio (PGI: Higher is better)	FALSE	FALSE	FALSE	Non-significant placebo advantage
PGI	Treatment	Receptive Language	ENDPT2 vs Baseline	PGI (Higher is better)	3	['PH003', 'PH006', 'PH009']	5.333	1	-4.333	18.8	0.178	1.8353	0.070179	1.499	-1.067	4.064	Treatment ratio > Placebo ratio (PGI: Higher is better)	FALSE	TRUE	FALSE	Non-significant treatment advantage
PGI	Placebo	Receptive Language	ENDPT2 vs Baseline	PGI (Higher is better)	3	['PH002', 'PH004', 'PH005']	3.333	0	-3.333	0	0.178	1.8353	0.070179	1.499	-1.067	4.064	Treatment ratio > Placebo ratio (PGI: Higher is better)	FALSE	TRUE	FALSE	Non-significant treatment advantage
PGI	Treatment	Receptive Language	ENDPT3 vs Baseline	PGI (Higher is better)	3	['PH003', 'PH006', 'PH009']	5.333	1.667	-3.667	31.3	0.228	2.2334	0.044636	1.824	-0.874	4.521	Treatment ratio > Placebo ratio (PGI: Higher is better)	TRUE	TRUE	TRUE	Significant treatment advantage
PGI	Placebo	Receptive Language	ENDPT3 vs Baseline	PGI (Higher is better)	3	['PH002', 'PH004', 'PH005']	3.333	0.333	-3	10	0.228	2.2334	0.044636	1.824	-0.874	4.521	Treatment ratio > Placebo ratio (PGI: Higher is better)	TRUE	TRUE	TRUE	Significant treatment advantage
PGI	Treatment	Sensory Sensitivity	ENDPT1 vs Baseline	PGI (Higher is better)	3	['PH003', 'PH006', 'PH009']	4.333	0.667	-3.667	15.4	0.167	1	0.18695	0.816	-1.543	3.176	Treatment ratio > Placebo ratio (PGI: Higher is better)	FALSE	TRUE	FALSE	Non-significant treatment advantage
PGI	Placebo	Sensory Sensitivity	ENDPT1 vs Baseline	PGI (Higher is better)	3	['PH002', 'PH004', 'PH005']	3.333	0	-3.333	0	0.167	1	0.18695	0.816	-1.543	3.176	Treatment ratio > Placebo ratio (PGI: Higher is better)	FALSE	TRUE	FALSE	Non-significant treatment advantage
PGI	Treatment	Sensory Sensitivity	ENDPT2 vs Baseline	PGI (Higher is better)	3	['PH003', 'PH006', 'PH009']	4.333	0.667	-3.667	15.4	0.278	1.3868	0.118898	1.132	-1.31	3.574	Treatment ratio > Placebo ratio (PGI: Higher is better)	FALSE	TRUE	FALSE	Non-significant treatment advantage
PGI	Placebo	Sensory Sensitivity	ENDPT2 vs Baseline	PGI (Higher is better)	3	['PH002', 'PH004', 'PH005']	3.333	-0.333	-3.667	-10	0.278	1.3868	0.118898	1.132	-1.31	3.574	Treatment ratio > Placebo ratio (PGI: Higher is better)	FALSE	TRUE	FALSE	Non-significant treatment advantage
PGI	Treatment	Sensory Sensitivity	ENDPT3 vs Baseline	PGI (Higher is better)	3	['PH003', 'PH006', 'PH009']	4.333	1	-3.333	23.1	0.167	0.9045	0.208433	0.739	-1.604	3.082	Treatment ratio > Placebo ratio (PGI: Higher is better)	FALSE	TRUE	FALSE	Non-significant treatment advantage
PGI	Placebo	Sensory Sensitivity	ENDPT3 vs Baseline	PGI (Higher is better)	3	['PH002', 'PH004', 'PH005']	3.333	0.333	-3	10	0.167	0.9045	0.208433	0.739	-1.604	3.082	Treatment ratio > Placebo ratio (PGI: Higher is better)	FALSE	TRUE	FALSE	Non-significant treatment advantage
PGI	Treatment	Sleep	ENDPT1 vs Baseline	PGI (Higher is better)	3	['PH003', 'PH006', 'PH009']	3.667	0.667	-3	18.2	0.05	0.1941	0.427795	0.158	-2.112	2.429	Treatment ratio > Placebo ratio (PGI: Higher is better)	FALSE	TRUE	FALSE	Non-significant treatment advantage
PGI	Placebo	Sleep	ENDPT1 vs Baseline	PGI (Higher is better)	3	['PH002', 'PH004', 'PH005']	3.667	0.333	-3.333	9.1	0.05	0.1941	0.427795	0.158	-2.112	2.429	Treatment ratio > Placebo ratio (PGI: Higher is better)	FALSE	TRUE	FALSE	Non-significant treatment advantage
PGI	Treatment	Sleep	ENDPT2 vs Baseline	PGI (Higher is better)	3	['PH003', 'PH006', 'PH009']	3.667	0.667	-3	18.2	0.05	0.318	0.383198	0.26	-2.017	2.536	Treatment ratio > Placebo ratio (PGI: Higher is better)	FALSE	TRUE	FALSE	Non-significant treatment advantage
PGI	Placebo	Sleep	ENDPT2 vs Baseline	PGI (Higher is better)	3	['PH002', 'PH004', 'PH005']	3.667	0.333	-3.333	9.1	0.05	0.318	0.383198	0.26	-2.017	2.536	Treatment ratio > Placebo ratio (PGI: Higher is better)	FALSE	TRUE	FALSE	Non-significant treatment advantage
PGI	Treatment	Sleep	ENDPT3 vs Baseline	PGI (Higher is better)	3	['PH003', 'PH006', 'PH009']	3.667	0.667	-3	18.2	0.05	0.318	0.383198	0.26	-2.017	2.536	Treatment ratio > Placebo ratio (PGI: Higher is better)	FALSE	TRUE	FALSE	Non-significant treatment advantage
PGI	Placebo	Sleep	ENDPT3 vs Baseline	PGI (Higher is better)	3	['PH002', 'PH004', 'PH005']	3.667	0.333	-3.333	9.1	0.05	0.318	0.383198	0.26	-2.017	2.536	Treatment ratio > Placebo ratio (PGI: Higher is better)	FALSE	TRUE	FALSE	Non-significant treatment advantage
PGI	Treatment	Sociability	ENDPT1 vs Baseline	PGI (Higher is better)	3	['PH003', 'PH006', 'PH009']	4.667	1	-3.667	21.4	0.111	0.4264	0.345881	0.348	-1.936	2.632	Treatment ratio > Placebo ratio (PGI: Higher is better)	FALSE	TRUE	FALSE	Non-significant treatment advantage
PGI	Placebo	Sociability	ENDPT1 vs Baseline	PGI (Higher is better)	3	['PH002', 'PH004', 'PH005']	4.667	0.667	-4	14.3	0.111	0.4264	0.345881	0.348	-1.936	2.632	Treatment ratio > Placebo ratio (PGI: Higher is better)	FALSE	TRUE	FALSE	Non-significant treatment advantage
PGI	Treatment	Sociability	ENDPT2 vs Baseline	PGI (Higher is better)	3	['PH003', 'PH006', 'PH009']	4.667	1	-3.667	21.4	0.111	0.4264	0.345881	0.348	-1.936	2.632	Treatment ratio > Placebo ratio (PGI: Higher is better)	FALSE	TRUE	FALSE	Non-significant treatment advantage
PGI	Placebo	Sociability	ENDPT2 vs Baseline	PGI (Higher is better)	3	['PH002', 'PH004', 'PH005']	4.667	0.667	-4	14.3	0.111	0.4264	0.345881	0.348	-1.936	2.632	Treatment ratio > Placebo ratio (PGI: Higher is better)	FALSE	TRUE	FALSE	Non-significant treatment advantage
PGI	Treatment	Sociability	ENDPT3 vs Baseline	PGI (Higher is better)	3	['PH003', 'PH006', 'PH009']	4.667	1.833	-2.833	39.3	0.167	0.636	0.279673	0.519	-1.786	2.824	Treatment ratio > Placebo ratio (PGI: Higher is better)	FALSE	TRUE	FALSE	Non-significant treatment advantage
PGI	Placebo	Sociability	ENDPT3 vs Baseline	PGI (Higher is better)	3	['PH002', 'PH004', 'PH005']	4.667	1	-3.667	21.4	0.167	0.636	0.279673	0.519	-1.786	2.824	Treatment ratio > Placebo ratio (PGI: Higher is better)	FALSE	TRUE	FALSE	Non-significant treatment advantage
PGI	Treatment	Stimming/Perseveration	ENDPT1 vs Baseline	PGI (Higher is better)	3	['PH003', 'PH006', 'PH009']	5	0.667	-4.333	13.3	0.222	1	0.18695	0.816	-1.543	3.176	Treatment ratio > Placebo ratio (PGI: Higher is better)	FALSE	TRUE	FALSE	Non-significant treatment advantage
PGI	Placebo	Stimming/Perseveration	ENDPT1 vs Baseline	PGI (Higher is better)	3	['PH002', 'PH004', 'PH005']	4	0	-4	0	0.222	1	0.18695	0.816	-1.543	3.176	Treatment ratio > Placebo ratio (PGI: Higher is better)	FALSE	TRUE	FALSE	Non-significant treatment advantage
PGI	Treatment	Stimming/Perseveration	ENDPT2 vs Baseline	PGI (Higher is better)	3	['PH003', 'PH006', 'PH009']	5	1	-4	20	0.333	1	0.18695	0.816	-1.543	3.176	Treatment ratio > Placebo ratio (PGI: Higher is better)	FALSE	TRUE	FALSE	Non-significant treatment advantage
PGI	Placebo	Stimming/Perseveration	ENDPT2 vs Baseline	PGI (Higher is better)	3	['PH002', 'PH004', 'PH005']	4	0	-4	0	0.333	1	0.18695	0.816	-1.543	3.176	Treatment ratio > Placebo ratio (PGI: Higher is better)	FALSE	TRUE	FALSE	Non-significant treatment advantage
PGI	Treatment	Stimming/Perseveration	ENDPT3 vs Baseline	PGI (Higher is better)	3	['PH003', 'PH006', 'PH009']	5	1.5	-3.5	30	0.194	0.5203	0.315161	0.425	-1.868	2.717	Treatment ratio > Placebo ratio (PGI: Higher is better)	FALSE	TRUE	FALSE	Non-significant treatment advantage
PGI	Placebo	Stimming/Perseveration	ENDPT3 vs Baseline	PGI (Higher is better)	3	['PH002', 'PH004', 'PH005']	4	0.667	-3.333	16.7	0.194	0.5203	0.315161	0.425	-1.868	2.717	Treatment ratio > Placebo ratio (PGI: Higher is better)	FALSE	TRUE	FALSE	Non-significant treatment advantage
PGI	Treatment	Stools/GI Problems	ENDPT1 vs Baseline	PGI (Higher is better)	3	['PH003', 'PH006', 'PH009']	6	1.333	-4.667	22.2	0.111	0.603	0.289508	0.492	-1.809	2.793	Treatment ratio > Placebo ratio (PGI: Higher is better)	FALSE	TRUE	FALSE	Non-significant treatment advantage
PGI	Placebo	Stools/GI Problems	ENDPT1 vs Baseline	PGI (Higher is better)	3	['PH002', 'PH004', 'PH005']	5.333	0.667	-4.667	12.5	0.111	0.603	0.289508	0.492	-1.809	2.793	Treatment ratio > Placebo ratio (PGI: Higher is better)	FALSE	TRUE	FALSE	Non-significant treatment advantage
PGI	Treatment	Stools/GI Problems	ENDPT2 vs Baseline	PGI (Higher is better)	3	['PH003', 'PH006', 'PH009']	6	1.833	-4.167	30.6	-0.056	-0.4472	0.661066	-0.365	-2.651	1.921	Treatment ratio > Placebo ratio (PGI: Higher is better)	FALSE	FALSE	FALSE	Non-significant placebo advantage
PGI	Placebo	Stools/GI Problems	ENDPT2 vs Baseline	PGI (Higher is better)	3	['PH002', 'PH004', 'PH005']	5.333	2	-3.333	37.5	-0.056	-0.4472	0.661066	-0.365	-2.651	1.921	Treatment ratio > Placebo ratio (PGI: Higher is better)	FALSE	FALSE	FALSE	Non-significant placebo advantage
PGI	Treatment	Stools/GI Problems	ENDPT3 vs Baseline	PGI (Higher is better)	3	['PH003', 'PH006', 'PH009']	6	2.167	-3.833	36.1	0.056	0.5345	0.310654	0.436	-1.857	2.73	Treatment ratio > Placebo ratio (PGI: Higher is better)	FALSE	TRUE	FALSE	Non-significant treatment advantage
PGI	Placebo	Stools/GI Problems	ENDPT3 vs Baseline	PGI (Higher is better)	3	['PH002', 'PH004', 'PH005']	5.333	1.667	-3.667	31.3	0.056	0.5345	0.310654	0.436	-1.857	2.73	Treatment ratio > Placebo ratio (PGI: Higher is better)	FALSE	TRUE	FALSE	Non-significant treatment advantage
PGI	Treatment	Tantrums/Meltdowns	ENDPT1 vs Baseline	PGI (Higher is better)	3	['PH003', 'PH006', 'PH009']	3.667	0.667	-3	18.2	0.333	1	0.18695	0.816	-1.543	3.176	Treatment ratio > Placebo ratio (PGI: Higher is better)	FALSE	TRUE	FALSE	Non-significant treatment advantage
PGI	Placebo	Tantrums/Meltdowns	ENDPT1 vs Baseline	PGI (Higher is better)	3	['PH002', 'PH004', 'PH005']	2	0	-2	0	0.333	1	0.18695	0.816	-1.543	3.176	Treatment ratio > Placebo ratio (PGI: Higher is better)	FALSE	TRUE	FALSE	Non-significant treatment advantage
PGI	Treatment	Tantrums/Meltdowns	ENDPT2 vs Baseline	PGI (Higher is better)	3	['PH003', 'PH006', 'PH009']	3.667	1.333	-2.333	36.4	0.583	1.2572	0.138535	1.027	-1.385	3.438	Treatment ratio > Placebo ratio (PGI: Higher is better)	FALSE	TRUE	FALSE	Non-significant treatment advantage
PGI	Placebo	Tantrums/Meltdowns	ENDPT2 vs Baseline	PGI (Higher is better)	3	['PH002', 'PH004', 'PH005']	2	0	-2	0	0.583	1.2572	0.138535	1.027	-1.385	3.438	Treatment ratio > Placebo ratio (PGI: Higher is better)	FALSE	TRUE	FALSE	Non-significant treatment advantage
PGI	Treatment	Tantrums/Meltdowns	ENDPT3 vs Baseline	PGI (Higher is better)	3	['PH003', 'PH006', 'PH009']	3.667	2.167	-1.5	59.1	0.417	0.822	0.228626	0.671	-1.659	3.001	Treatment ratio > Placebo ratio (PGI: Higher is better)	FALSE	TRUE	FALSE	Non-significant treatment advantage
PGI	Placebo	Tantrums/Meltdowns	ENDPT3 vs Baseline	PGI (Higher is better)	3	['PH002', 'PH004', 'PH005']	2	0.333	-1.667	16.7	0.417	0.822	0.228626	0.671	-1.659	3.001	Treatment ratio > Placebo ratio (PGI: Higher is better)	FALSE	TRUE	FALSE	Non-significant treatment advantage
GSRS	Treatment	1 - abdominal pain	ENDPT1 vs Baseline	GSRS (Lower is better)	3	['PH003', 'PH006', 'PH009']	4	1.333	-2.667	-88.9	-1	-0.5883	0.293957	-0.48	-2.78	1.819	Treatment delta < Placebo delta (Lower is better: One-tailed test)	FALSE	TRUE	FALSE	Non-significant treatment advantage
GSRS	Placebo	1 - abdominal pain	ENDPT1 vs Baseline	GSRS (Lower is better)	3	['PH002', 'PH004', 'PH005']	6	4.333	-1.667	-33.3	-1	-0.5883	0.293957	-0.48	-2.78	1.819	Treatment delta < Placebo delta (Lower is better: One-tailed test)	FALSE	TRUE	FALSE	Non-significant treatment advantage
GSRS	Treatment	1 - abdominal pain	ENDPT2 vs Baseline	GSRS (Lower is better)	3	['PH003', 'PH006', 'PH009']	4	1	-3	-100	1	1	0.81305	0.816	-1.543	3.176	Treatment delta < Placebo delta (Lower is better: One-tailed test)	FALSE	FALSE	FALSE	Non-significant placebo advantage
GSRS	Placebo	1 - abdominal pain	ENDPT2 vs Baseline	GSRS (Lower is better)	3	['PH002', 'PH004', 'PH005']	6	2	-4	-80	1	1	0.81305	0.816	-1.543	3.176	Treatment delta < Placebo delta (Lower is better: One-tailed test)	FALSE	FALSE	FALSE	Non-significant placebo advantage
GSRS	Treatment	1 - abdominal pain	ENDPT3 vs Baseline	GSRS (Lower is better)	3	['PH003', 'PH006', 'PH009']	4	1	-3	-100	1.167	1.9415	0.937915	1.585	-1.014	4.184	Treatment delta < Placebo delta (Lower is better: One-tailed test)	FALSE	FALSE	FALSE	Non-significant placebo advantage
GSRS	Placebo	1 - abdominal pain	ENDPT3 vs Baseline	GSRS (Lower is better)	3	['PH002', 'PH004', 'PH005']	6	1.833	-4.167	-83.3	1.167	1.9415	0.937915	1.585	-1.014	4.184	Treatment delta < Placebo delta (Lower is better: One-tailed test)	FALSE	FALSE	FALSE	Non-significant placebo advantage
GSRS	Treatment	10 - constipation	ENDPT1 vs Baseline	GSRS (Lower is better)	3	['PH003', 'PH006', 'PH009']	5.667	2.333	-3.333	-71.4	-2.333	-1.3229	0.128217	-1.08	-3.507	1.347	Treatment delta < Placebo delta (Lower is better: One-tailed test)	FALSE	TRUE	FALSE	Non-significant treatment advantage
GSRS	Placebo	10 - constipation	ENDPT1 vs Baseline	GSRS (Lower is better)	3	['PH002', 'PH004', 'PH005']	6	5	-1	-20	-2.333	-1.3229	0.128217	-1.08	-3.507	1.347	Treatment delta < Placebo delta (Lower is better: One-tailed test)	FALSE	TRUE	FALSE	Non-significant treatment advantage
GSRS	Treatment	10 - constipation	ENDPT2 vs Baseline	GSRS (Lower is better)	3	['PH003', 'PH006', 'PH009']	5.667	1.333	-4.333	-92.9	-2.333	-1.75	0.077508	-1.429	-3.969	1.111	Treatment delta < Placebo delta (Lower is better: One-tailed test)	FALSE	TRUE	FALSE	Non-significant treatment advantage
GSRS	Placebo	10 - constipation	ENDPT2 vs Baseline	GSRS (Lower is better)	3	['PH002', 'PH004', 'PH005']	6	4	-2	-40	-2.333	-1.75	0.077508	-1.429	-3.969	1.111	Treatment delta < Placebo delta (Lower is better: One-tailed test)	FALSE	TRUE	FALSE	Non-significant treatment advantage
GSRS	Treatment	10 - constipation	ENDPT3 vs Baseline	GSRS (Lower is better)	3	['PH003', 'PH006', 'PH009']	5.667	1.333	-4.333	-92.9	-1.5	-0.805	0.232977	-0.657	-2.985	1.67	Treatment delta < Placebo delta (Lower is better: One-tailed test)	FALSE	TRUE	FALSE	Non-significant treatment advantage
GSRS	Placebo	10 - constipation	ENDPT3 vs Baseline	GSRS (Lower is better)	3	['PH002', 'PH004', 'PH005']	6	3.167	-2.833	-56.7	-1.5	-0.805	0.232977	-0.657	-2.985	1.67	Treatment delta < Placebo delta (Lower is better: One-tailed test)	FALSE	TRUE	FALSE	Non-significant treatment advantage
GSRS	Treatment	11- diarrhea	ENDPT1 vs Baseline	GSRS (Lower is better)	3	['PH003', 'PH006', 'PH009']	3.667	1	-2.667	-100	-1	-0.5571	0.303584	-0.455	-2.751	1.841	Treatment delta < Placebo delta (Lower is better: One-tailed test)	FALSE	TRUE	FALSE	Non-significant treatment advantage
GSRS	Placebo	11- diarrhea	ENDPT1 vs Baseline	GSRS (Lower is better)	3	['PH002', 'PH004', 'PH005']	6	4.333	-1.667	-33.3	-1	-0.5571	0.303584	-0.455	-2.751	1.841	Treatment delta < Placebo delta (Lower is better: One-tailed test)	FALSE	TRUE	FALSE	Non-significant treatment advantage
GSRS	Treatment	11- diarrhea	ENDPT2 vs Baseline	GSRS (Lower is better)	3	['PH003', 'PH006', 'PH009']	3.667	1	-2.667	-100	0.667	0.3123	0.614809	0.255	-2.021	2.531	Treatment delta < Placebo delta (Lower is better: One-tailed test)	FALSE	FALSE	FALSE	Non-significant placebo advantage
GSRS	Placebo	11- diarrhea	ENDPT2 vs Baseline	GSRS (Lower is better)	3	['PH002', 'PH004', 'PH005']	6	2.667	-3.333	-66.7	0.667	0.3123	0.614809	0.255	-2.021	2.531	Treatment delta < Placebo delta (Lower is better: One-tailed test)	FALSE	FALSE	FALSE	Non-significant placebo advantage
GSRS	Treatment	11- diarrhea	ENDPT3 vs Baseline	GSRS (Lower is better)	3	['PH003', 'PH006', 'PH009']	3.667	1	-2.667	-100	1.167	0.6585	0.726906	0.538	-1.77	2.845	Treatment delta < Placebo delta (Lower is better: One-tailed test)	FALSE	FALSE	FALSE	Non-significant placebo advantage
GSRS	Placebo	11- diarrhea	ENDPT3 vs Baseline	GSRS (Lower is better)	3	['PH002', 'PH004', 'PH005']	6	2.167	-3.833	-76.7	1.167	0.6585	0.726906	0.538	-1.77	2.845	Treatment delta < Placebo delta (Lower is better: One-tailed test)	FALSE	FALSE	FALSE	Non-significant placebo advantage
GSRS	Treatment	12 - loose stools	ENDPT1 vs Baseline	GSRS (Lower is better)	3	['PH003', 'PH006', 'PH009']	3.667	1	-2.667	-100	-1	-0.5303	0.311979	-0.433	-2.726	1.86	Treatment delta < Placebo delta (Lower is better: One-tailed test)	FALSE	TRUE	FALSE	Non-significant treatment advantage
GSRS	Placebo	12 - loose stools	ENDPT1 vs Baseline	GSRS (Lower is better)	3	['PH002', 'PH004', 'PH005']	5	3.333	-1.667	-41.7	-1	-0.5303	0.311979	-0.433	-2.726	1.86	Treatment delta < Placebo delta (Lower is better: One-tailed test)	FALSE	TRUE	FALSE	Non-significant treatment advantage
GSRS	Treatment	12 - loose stools	ENDPT2 vs Baseline	GSRS (Lower is better)	3	['PH003', 'PH006', 'PH009']	3.667	1.333	-2.333	-87.5	1	0.5303	0.688021	0.433	-1.86	2.726	Treatment delta < Placebo delta (Lower is better: One-tailed test)	FALSE	FALSE	FALSE	Non-significant placebo advantage
GSRS	Placebo	12 - loose stools	ENDPT2 vs Baseline	GSRS (Lower is better)	3	['PH002', 'PH004', 'PH005']	5	1.667	-3.333	-83.3	1	0.5303	0.688021	0.433	-1.86	2.726	Treatment delta < Placebo delta (Lower is better: One-tailed test)	FALSE	FALSE	FALSE	Non-significant placebo advantage
GSRS	Treatment	12 - loose stools	ENDPT3 vs Baseline	GSRS (Lower is better)	3	['PH003', 'PH006', 'PH009']	3.667	1	-2.667	-100	0.667	0.3381	0.623843	0.276	-2.002	2.554	Treatment delta < Placebo delta (Lower is better: One-tailed test)	FALSE	FALSE	FALSE	Non-significant placebo advantage
GSRS	Placebo	12 - loose stools	ENDPT3 vs Baseline	GSRS (Lower is better)	3	['PH002', 'PH004', 'PH005']	5	1.667	-3.333	-83.3	0.667	0.3381	0.623843	0.276	-2.002	2.554	Treatment delta < Placebo delta (Lower is better: One-tailed test)	FALSE	FALSE	FALSE	Non-significant placebo advantage
GSRS	Treatment	13 - hard stools	ENDPT1 vs Baseline	GSRS (Lower is better)	3	['PH003', 'PH006', 'PH009']	6.333	1.667	-4.667	-87.5	-3.333	-2.0851	0.052704	-1.703	-4.348	0.943	Treatment delta < Placebo delta (Lower is better: One-tailed test)	FALSE	TRUE	FALSE	Non-significant treatment advantage
GSRS	Placebo	13 - hard stools	ENDPT1 vs Baseline	GSRS (Lower is better)	3	['PH002', 'PH004', 'PH005']	3	1.667	-1.333	-66.7	-3.333	-2.0851	0.052704	-1.703	-4.348	0.943	Treatment delta < Placebo delta (Lower is better: One-tailed test)	FALSE	TRUE	FALSE	Non-significant treatment advantage
GSRS	Treatment	13 - hard stools	ENDPT2 vs Baseline	GSRS (Lower is better)	3	['PH003', 'PH006', 'PH009']	6.333	1.333	-5	-93.8	-4	-1.8516	0.068864	-1.512	-4.082	1.059	Treatment delta < Placebo delta (Lower is better: One-tailed test)	FALSE	TRUE	FALSE	Non-significant treatment advantage
GSRS	Placebo	13 - hard stools	ENDPT2 vs Baseline	GSRS (Lower is better)	3	['PH002', 'PH004', 'PH005']	3	2	-1	-50	-4	-1.8516	0.068864	-1.512	-4.082	1.059	Treatment delta < Placebo delta (Lower is better: One-tailed test)	FALSE	TRUE	FALSE	Non-significant treatment advantage
GSRS	Treatment	13 - hard stools	ENDPT3 vs Baseline	GSRS (Lower is better)	3	['PH003', 'PH006', 'PH009']	6.333	1	-5.333	-100	-4.667	-1.9799	0.059408	-1.617	-4.228	0.995	Treatment delta < Placebo delta (Lower is better: One-tailed test)	FALSE	TRUE	FALSE	Non-significant treatment advantage
GSRS	Placebo	13 - hard stools	ENDPT3 vs Baseline	GSRS (Lower is better)	3	['PH002', 'PH004', 'PH005']	3	2.333	-0.667	-33.3	-4.667	-1.9799	0.059408	-1.617	-4.228	0.995	Treatment delta < Placebo delta (Lower is better: One-tailed test)	FALSE	TRUE	FALSE	Non-significant treatment advantage
GSRS	Treatment	14 - urgent need for BM	ENDPT1 vs Baseline	GSRS (Lower is better)	3	['PH003', 'PH006', 'PH009']	4.667	1.333	-3.333	-90.9	-1.667	-0.9806	0.19116	-0.801	-3.157	1.555	Treatment delta < Placebo delta (Lower is better: One-tailed test)	FALSE	TRUE	FALSE	Non-significant treatment advantage
GSRS	Placebo	14 - urgent need for BM	ENDPT1 vs Baseline	GSRS (Lower is better)	3	['PH002', 'PH004', 'PH005']	3	1.333	-1.667	-83.3	-1.667	-0.9806	0.19116	-0.801	-3.157	1.555	Treatment delta < Placebo delta (Lower is better: One-tailed test)	FALSE	TRUE	FALSE	Non-significant treatment advantage
GSRS	Treatment	14 - urgent need for BM	ENDPT2 vs Baseline	GSRS (Lower is better)	3	['PH003', 'PH006', 'PH009']	4.667	1	-3.667	-100	-1.667	-0.822	0.228626	-0.671	-3.001	1.659	Treatment delta < Placebo delta (Lower is better: One-tailed test)	FALSE	TRUE	FALSE	Non-significant treatment advantage
GSRS	Placebo	14 - urgent need for BM	ENDPT2 vs Baseline	GSRS (Lower is better)	3	['PH002', 'PH004', 'PH005']	3	1	-2	-100	-1.667	-0.822	0.228626	-0.671	-3.001	1.659	Treatment delta < Placebo delta (Lower is better: One-tailed test)	FALSE	TRUE	FALSE	Non-significant treatment advantage
GSRS	Treatment	14 - urgent need for BM	ENDPT3 vs Baseline	GSRS (Lower is better)	3	['PH003', 'PH006', 'PH009']	4.667	1.333	-3.333	-90.9	-1.333	-0.6576	0.273358	-0.537	-2.844	1.771	Treatment delta < Placebo delta (Lower is better: One-tailed test)	FALSE	TRUE	FALSE	Non-significant treatment advantage
GSRS	Placebo	14 - urgent need for BM	ENDPT3 vs Baseline	GSRS (Lower is better)	3	['PH002', 'PH004', 'PH005']	3	1	-2	-100	-1.333	-0.6576	0.273358	-0.537	-2.844	1.771	Treatment delta < Placebo delta (Lower is better: One-tailed test)	FALSE	TRUE	FALSE	Non-significant treatment advantage
GSRS	Treatment	15 - incomplete evacuation	ENDPT1 vs Baseline	GSRS (Lower is better)	3	['PH003', 'PH006', 'PH009']	5.667	1.333	-4.333	-92.9	-3.667	-3.3166	0.014736	-2.708	-5.846	0.43	Treatment delta < Placebo delta (Lower is better: One-tailed test)	TRUE	TRUE	TRUE	Significant treatment advantage
GSRS	Placebo	15 - incomplete evacuation	ENDPT1 vs Baseline	GSRS (Lower is better)	3	['PH002', 'PH004', 'PH005']	5.333	4.667	-0.667	-15.4	-3.667	-3.3166	0.014736	-2.708	-5.846	0.43	Treatment delta < Placebo delta (Lower is better: One-tailed test)	TRUE	TRUE	TRUE	Significant treatment advantage
GSRS	Treatment	15 - incomplete evacuation	ENDPT2 vs Baseline	GSRS (Lower is better)	3	['PH003', 'PH006', 'PH009']	5.667	1.667	-4	-85.7	-2	-1.2247	0.143932	-1	-3.404	1.404	Treatment delta < Placebo delta (Lower is better: One-tailed test)	FALSE	TRUE	FALSE	Non-significant treatment advantage
GSRS	Placebo	15 - incomplete evacuation	ENDPT2 vs Baseline	GSRS (Lower is better)	3	['PH002', 'PH004', 'PH005']	5.333	3.333	-2	-46.2	-2	-1.2247	0.143932	-1	-3.404	1.404	Treatment delta < Placebo delta (Lower is better: One-tailed test)	FALSE	TRUE	FALSE	Non-significant treatment advantage
GSRS	Treatment	15 - incomplete evacuation	ENDPT3 vs Baseline	GSRS (Lower is better)	3	['PH003', 'PH006', 'PH009']	5.667	1.333	-4.333	-92.9	-2	-1.3416	0.125408	-1.095	-3.526	1.336	Treatment delta < Placebo delta (Lower is better: One-tailed test)	FALSE	TRUE	FALSE	Non-significant treatment advantage
GSRS	Placebo	15 - incomplete evacuation	ENDPT3 vs Baseline	GSRS (Lower is better)	3	['PH002', 'PH004', 'PH005']	5.333	3	-2.333	-53.8	-2	-1.3416	0.125408	-1.095	-3.526	1.336	Treatment delta < Placebo delta (Lower is better: One-tailed test)	FALSE	TRUE	FALSE	Non-significant treatment advantage
GSRS	Treatment	2- heartburn	ENDPT1 vs Baseline	GSRS (Lower is better)	3	['PH003', 'PH006', 'PH009']	1	1	0	0	1	0.6547	0.725788	0.535	-1.773	2.842	Treatment delta < Placebo delta (Lower is better: One-tailed test)	FALSE	FALSE	FALSE	Non-significant placebo advantage
GSRS	Placebo	2- heartburn	ENDPT1 vs Baseline	GSRS (Lower is better)	3	['PH002', 'PH004', 'PH005']	4.333	3.333	-1	-30	1	0.6547	0.725788	0.535	-1.773	2.842	Treatment delta < Placebo delta (Lower is better: One-tailed test)	FALSE	FALSE	FALSE	Non-significant placebo advantage
GSRS	Treatment	2- heartburn	ENDPT2 vs Baseline	GSRS (Lower is better)	3	['PH003', 'PH006', 'PH009']	1	1	0	0	3	2.5981	0.969915	2.121	-0.712	4.955	Treatment delta < Placebo delta (Lower is better: One-tailed test)	FALSE	FALSE	FALSE	Non-significant placebo advantage
GSRS	Placebo	2- heartburn	ENDPT2 vs Baseline	GSRS (Lower is better)	3	['PH002', 'PH004', 'PH005']	4.333	1.333	-3	-90	3	2.5981	0.969915	2.121	-0.712	4.955	Treatment delta < Placebo delta (Lower is better: One-tailed test)	FALSE	FALSE	FALSE	Non-significant placebo advantage
GSRS	Treatment	2- heartburn	ENDPT3 vs Baseline	GSRS (Lower is better)	3	['PH003', 'PH006', 'PH009']	1	1	0	0	3.333	2.7735	0.974925	2.265	-0.639	5.169	Treatment delta < Placebo delta (Lower is better: One-tailed test)	FALSE	FALSE	FALSE	Non-significant placebo advantage
GSRS	Placebo	2- heartburn	ENDPT3 vs Baseline	GSRS (Lower is better)	3	['PH002', 'PH004', 'PH005']	4.333	1	-3.333	-100	3.333	2.7735	0.974925	2.265	-0.639	5.169	Treatment delta < Placebo delta (Lower is better: One-tailed test)	FALSE	FALSE	FALSE	Non-significant placebo advantage
GSRS	Treatment	3- acid reflux	ENDPT1 vs Baseline	GSRS (Lower is better)	3	['PH003', 'PH006', 'PH009']	1.667	1	-0.667	-100	1	0.7276	0.746421	0.594	-1.722	2.911	Treatment delta < Placebo delta (Lower is better: One-tailed test)	FALSE	FALSE	FALSE	Non-significant placebo advantage
GSRS	Placebo	3- acid reflux	ENDPT1 vs Baseline	GSRS (Lower is better)	3	['PH002', 'PH004', 'PH005']	4	2.333	-1.667	-55.6	1	0.7276	0.746421	0.594	-1.722	2.911	Treatment delta < Placebo delta (Lower is better: One-tailed test)	FALSE	FALSE	FALSE	Non-significant placebo advantage
GSRS	Treatment	3- acid reflux	ENDPT2 vs Baseline	GSRS (Lower is better)	3	['PH003', 'PH006', 'PH009']	1.667	1	-0.667	-100	2.333	1.9415	0.937915	1.585	-1.014	4.184	Treatment delta < Placebo delta (Lower is better: One-tailed test)	FALSE	FALSE	FALSE	Non-significant placebo advantage
GSRS	Placebo	3- acid reflux	ENDPT2 vs Baseline	GSRS (Lower is better)	3	['PH002', 'PH004', 'PH005']	4	1	-3	-100	2.333	1.9415	0.937915	1.585	-1.014	4.184	Treatment delta < Placebo delta (Lower is better: One-tailed test)	FALSE	FALSE	FALSE	Non-significant placebo advantage
GSRS	Treatment	3- acid reflux	ENDPT3 vs Baseline	GSRS (Lower is better)	3	['PH003', 'PH006', 'PH009']	1.667	1.333	-0.333	-50	2.667	2.5298	0.967662	2.066	-0.742	4.873	Treatment delta < Placebo delta (Lower is better: One-tailed test)	FALSE	FALSE	FALSE	Non-significant placebo advantage
GSRS	Placebo	3- acid reflux	ENDPT3 vs Baseline	GSRS (Lower is better)	3	['PH002', 'PH004', 'PH005']	4	1	-3	-100	2.667	2.5298	0.967662	2.066	-0.742	4.873	Treatment delta < Placebo delta (Lower is better: One-tailed test)	FALSE	FALSE	FALSE	Non-significant placebo advantage
GSRS	Treatment	4- hunger	ENDPT1 vs Baseline	GSRS (Lower is better)	3	['PH003', 'PH006', 'PH009']	4.333	1.333	-3	-90	-3.333	-5	0.003745	-4.082	-8.063	-0.102	Treatment delta < Placebo delta (Lower is better: One-tailed test)	TRUE	TRUE	TRUE	Significant treatment advantage
GSRS	Placebo	4- hunger	ENDPT1 vs Baseline	GSRS (Lower is better)	3	['PH002', 'PH004', 'PH005']	1	1.333	0.333	0	-3.333	-5	0.003745	-4.082	-8.063	-0.102	Treatment delta < Placebo delta (Lower is better: One-tailed test)	TRUE	TRUE	TRUE	Significant treatment advantage
GSRS	Treatment	4- hunger	ENDPT2 vs Baseline	GSRS (Lower is better)	3	['PH003', 'PH006', 'PH009']	4.333	1.667	-2.667	-80	-2.667	-3.0237	0.01951	-2.469	-5.478	0.54	Treatment delta < Placebo delta (Lower is better: One-tailed test)	TRUE	TRUE	TRUE	Significant treatment advantage
GSRS	Placebo	4- hunger	ENDPT2 vs Baseline	GSRS (Lower is better)	3	['PH002', 'PH004', 'PH005']	1	1	0	0	-2.667	-3.0237	0.01951	-2.469	-5.478	0.54	Treatment delta < Placebo delta (Lower is better: One-tailed test)	TRUE	TRUE	TRUE	Significant treatment advantage
GSRS	Treatment	4- hunger	ENDPT3 vs Baseline	GSRS (Lower is better)	3	['PH003', 'PH006', 'PH009']	4.333	1.333	-3	-90	-3	-5.1962	0.003267	-4.243	-8.329	-0.156	Treatment delta < Placebo delta (Lower is better: One-tailed test)	TRUE	TRUE	TRUE	Significant treatment advantage
GSRS	Placebo	4- hunger	ENDPT3 vs Baseline	GSRS (Lower is better)	3	['PH002', 'PH004', 'PH005']	1	1	0	0	-3	-5.1962	0.003267	-4.243	-8.329	-0.156	Treatment delta < Placebo delta (Lower is better: One-tailed test)	TRUE	TRUE	TRUE	Significant treatment advantage
GSRS	Treatment	5- nausea	ENDPT1 vs Baseline	GSRS (Lower is better)	3	['PH003', 'PH006', 'PH009']	1.333	1	-0.333	-100	0.667	0.6325	0.719281	0.516	-1.788	2.821	Treatment delta < Placebo delta (Lower is better: One-tailed test)	FALSE	FALSE	FALSE	Non-significant placebo advantage
GSRS	Placebo	5- nausea	ENDPT1 vs Baseline	GSRS (Lower is better)	3	['PH002', 'PH004', 'PH005']	4	3	-1	-33.3	0.667	0.6325	0.719281	0.516	-1.788	2.821	Treatment delta < Placebo delta (Lower is better: One-tailed test)	FALSE	FALSE	FALSE	Non-significant placebo advantage
GSRS	Treatment	5- nausea	ENDPT2 vs Baseline	GSRS (Lower is better)	3	['PH003', 'PH006', 'PH009']	1.333	1	-0.333	-100	2.667	1.7056	0.918361	1.393	-1.134	3.919	Treatment delta < Placebo delta (Lower is better: One-tailed test)	FALSE	FALSE	FALSE	Non-significant placebo advantage
GSRS	Placebo	5- nausea	ENDPT2 vs Baseline	GSRS (Lower is better)	3	['PH002', 'PH004', 'PH005']	4	1	-3	-100	2.667	1.7056	0.918361	1.393	-1.134	3.919	Treatment delta < Placebo delta (Lower is better: One-tailed test)	FALSE	FALSE	FALSE	Non-significant placebo advantage
GSRS	Treatment	5- nausea	ENDPT3 vs Baseline	GSRS (Lower is better)	3	['PH003', 'PH006', 'PH009']	1.333	1.333	0	0	3	1.964	0.939498	1.604	-1.002	4.21	Treatment delta < Placebo delta (Lower is better: One-tailed test)	FALSE	FALSE	FALSE	Non-significant placebo advantage
GSRS	Placebo	5- nausea	ENDPT3 vs Baseline	GSRS (Lower is better)	3	['PH002', 'PH004', 'PH005']	4	1	-3	-100	3	1.964	0.939498	1.604	-1.002	4.21	Treatment delta < Placebo delta (Lower is better: One-tailed test)	FALSE	FALSE	FALSE	Non-significant placebo advantage
GSRS	Treatment	6- rumbling/ borborygmus	ENDPT1 vs Baseline	GSRS (Lower is better)	3	['PH003', 'PH006', 'PH009']	3.667	1.333	-2.333	-87.5	-1.333	-0.8528	0.220912	-0.696	-3.031	1.638	Treatment delta < Placebo delta (Lower is better: One-tailed test)	FALSE	TRUE	FALSE	Non-significant treatment advantage
GSRS	Placebo	6- rumbling/ borborygmus	ENDPT1 vs Baseline	GSRS (Lower is better)	3	['PH002', 'PH004', 'PH005']	4	3	-1	-33.3	-1.333	-0.8528	0.220912	-0.696	-3.031	1.638	Treatment delta < Placebo delta (Lower is better: One-tailed test)	FALSE	TRUE	FALSE	Non-significant treatment advantage
GSRS	Treatment	6- rumbling/ borborygmus	ENDPT2 vs Baseline	GSRS (Lower is better)	3	['PH003', 'PH006', 'PH009']	3.667	1	-2.667	-100	0	0	0.5	0	-2.267	2.267	Treatment delta < Placebo delta (Lower is better: One-tailed test)	FALSE	FALSE	FALSE	Non-significant no meaningful difference
GSRS	Placebo	6- rumbling/ borborygmus	ENDPT2 vs Baseline	GSRS (Lower is better)	3	['PH002', 'PH004', 'PH005']	4	1.333	-2.667	-88.9	0	0	0.5	0	-2.267	2.267	Treatment delta < Placebo delta (Lower is better: One-tailed test)	FALSE	FALSE	FALSE	Non-significant no meaningful difference
GSRS	Treatment	6- rumbling/ borborygmus	ENDPT3 vs Baseline	GSRS (Lower is better)	3	['PH003', 'PH006', 'PH009']	3.667	1.333	-2.333	-87.5	-0.333	-0.1715	0.436079	-0.14	-2.41	2.13	Treatment delta < Placebo delta (Lower is better: One-tailed test)	FALSE	TRUE	FALSE	Non-significant treatment advantage
GSRS	Placebo	6- rumbling/ borborygmus	ENDPT3 vs Baseline	GSRS (Lower is better)	3	['PH002', 'PH004', 'PH005']	4	2	-2	-66.7	-0.333	-0.1715	0.436079	-0.14	-2.41	2.13	Treatment delta < Placebo delta (Lower is better: One-tailed test)	FALSE	TRUE	FALSE	Non-significant treatment advantage
GSRS	Treatment	7- bloating/ ab distension	ENDPT1 vs Baseline	GSRS (Lower is better)	3	['PH003', 'PH006', 'PH009']	4	2	-2	-66.7	-0.667	-0.4264	0.345881	-0.348	-2.632	1.936	Treatment delta < Placebo delta (Lower is better: One-tailed test)	FALSE	TRUE	FALSE	Non-significant treatment advantage
GSRS	Placebo	7- bloating/ ab distension	ENDPT1 vs Baseline	GSRS (Lower is better)	3	['PH002', 'PH004', 'PH005']	5.667	4.333	-1.333	-28.6	-0.667	-0.4264	0.345881	-0.348	-2.632	1.936	Treatment delta < Placebo delta (Lower is better: One-tailed test)	FALSE	TRUE	FALSE	Non-significant treatment advantage
GSRS	Treatment	7- bloating/ ab distension	ENDPT2 vs Baseline	GSRS (Lower is better)	3	['PH003', 'PH006', 'PH009']	4	1.667	-2.333	-77.8	1	0.5571	0.696416	0.455	-1.841	2.751	Treatment delta < Placebo delta (Lower is better: One-tailed test)	FALSE	FALSE	FALSE	Non-significant placebo advantage
GSRS	Placebo	7- bloating/ ab distension	ENDPT2 vs Baseline	GSRS (Lower is better)	3	['PH002', 'PH004', 'PH005']	5.667	2.333	-3.333	-71.4	1	0.5571	0.696416	0.455	-1.841	2.751	Treatment delta < Placebo delta (Lower is better: One-tailed test)	FALSE	FALSE	FALSE	Non-significant placebo advantage
GSRS	Treatment	7- bloating/ ab distension	ENDPT3 vs Baseline	GSRS (Lower is better)	3	['PH003', 'PH006', 'PH009']	4	1.333	-2.667	-88.9	1	1.0607	0.825679	0.866	-1.505	3.237	Treatment delta < Placebo delta (Lower is better: One-tailed test)	FALSE	FALSE	FALSE	Non-significant placebo advantage
GSRS	Placebo	7- bloating/ ab distension	ENDPT3 vs Baseline	GSRS (Lower is better)	3	['PH002', 'PH004', 'PH005']	5.667	2	-3.667	-78.6	1	1.0607	0.825679	0.866	-1.505	3.237	Treatment delta < Placebo delta (Lower is better: One-tailed test)	FALSE	FALSE	FALSE	Non-significant placebo advantage
GSRS	Treatment	8- burping/eructation	ENDPT1 vs Baseline	GSRS (Lower is better)	3	['PH003', 'PH006', 'PH009']	4	1	-3	-100	-1.5	-0.9333	0.20176	-0.762	-3.11	1.586	Treatment delta < Placebo delta (Lower is better: One-tailed test)	FALSE	TRUE	FALSE	Non-significant treatment advantage
GSRS	Placebo	8- burping/eructation	ENDPT1 vs Baseline	GSRS (Lower is better)	3	['PH002', 'PH004', 'PH005']	3.333	1.833	-1.5	-64.3	-1.5	-0.9333	0.20176	-0.762	-3.11	1.586	Treatment delta < Placebo delta (Lower is better: One-tailed test)	FALSE	TRUE	FALSE	Non-significant treatment advantage
GSRS	Treatment	8- burping/eructation	ENDPT2 vs Baseline	GSRS (Lower is better)	3	['PH003', 'PH006', 'PH009']	4	1	-3	-100	-1	-0.6124	0.286696	-0.5	-2.802	1.802	Treatment delta < Placebo delta (Lower is better: One-tailed test)	FALSE	TRUE	FALSE	Non-significant treatment advantage
GSRS	Placebo	8- burping/eructation	ENDPT2 vs Baseline	GSRS (Lower is better)	3	['PH002', 'PH004', 'PH005']	3.333	1.333	-2	-85.7	-1	-0.6124	0.286696	-0.5	-2.802	1.802	Treatment delta < Placebo delta (Lower is better: One-tailed test)	FALSE	TRUE	FALSE	Non-significant treatment advantage
GSRS	Treatment	8- burping/eructation	ENDPT3 vs Baseline	GSRS (Lower is better)	3	['PH003', 'PH006', 'PH009']	4	1	-3	-100	-1	-0.6124	0.286696	-0.5	-2.802	1.802	Treatment delta < Placebo delta (Lower is better: One-tailed test)	FALSE	TRUE	FALSE	Non-significant treatment advantage
GSRS	Placebo	8- burping/eructation	ENDPT3 vs Baseline	GSRS (Lower is better)	3	['PH002', 'PH004', 'PH005']	3.333	1.333	-2	-85.7	-1	-0.6124	0.286696	-0.5	-2.802	1.802	Treatment delta < Placebo delta (Lower is better: One-tailed test)	FALSE	TRUE	FALSE	Non-significant treatment advantage
GSRS	Treatment	9 - gas	ENDPT1 vs Baseline	GSRS (Lower is better)	3	['PH003', 'PH006', 'PH009']	5	4	-1	-25	0	0	0.5	0	-2.267	2.267	Treatment delta < Placebo delta (Lower is better: One-tailed test)	FALSE	FALSE	FALSE	Non-significant no meaningful difference
GSRS	Placebo	9 - gas	ENDPT1 vs Baseline	GSRS (Lower is better)	3	['PH002', 'PH004', 'PH005']	6	5	-1	-20	0	0	0.5	0	-2.267	2.267	Treatment delta < Placebo delta (Lower is better: One-tailed test)	FALSE	FALSE	FALSE	Non-significant no meaningful difference
GSRS	Treatment	9 - gas	ENDPT2 vs Baseline	GSRS (Lower is better)	3	['PH003', 'PH006', 'PH009']	5	3.667	-1.333	-33.3	2.333	1.5652	0.903711	1.278	-1.21	3.766	Treatment delta < Placebo delta (Lower is better: One-tailed test)	FALSE	FALSE	FALSE	Non-significant placebo advantage
GSRS	Placebo	9 - gas	ENDPT2 vs Baseline	GSRS (Lower is better)	3	['PH002', 'PH004', 'PH005']	6	2.333	-3.667	-73.3	2.333	1.5652	0.903711	1.278	-1.21	3.766	Treatment delta < Placebo delta (Lower is better: One-tailed test)	FALSE	FALSE	FALSE	Non-significant placebo advantage
GSRS	Treatment	9 - gas	ENDPT3 vs Baseline	GSRS (Lower is better)	3	['PH003', 'PH006', 'PH009']	5	2	-3	-75	1.333	2	0.941942	1.633	-0.985	4.251	Treatment delta < Placebo delta (Lower is better: One-tailed test)	FALSE	FALSE	FALSE	Non-significant placebo advantage
GSRS	Placebo	9 - gas	ENDPT3 vs Baseline	GSRS (Lower is better)	3	['PH002', 'PH004', 'PH005']	6	1.667	-4.333	-86.7	1.333	2	0.941942	1.633	-0.985	4.251	Treatment delta < Placebo delta (Lower is better: One-tailed test)	FALSE	FALSE	FALSE	Non-significant placebo advantage
GSRS	Treatment	GSRS Subscores- abdominal pain	ENDPT1 vs Baseline	GSRS (Lower is better)	3	['PH003', 'PH006', 'PH009']	3.22	1.223	-1.997	-89.9	-1.217	-1.2552	0.138864	-1.025	-3.436	1.386	Treatment delta < Placebo delta (Lower is better: One-tailed test)	FALSE	TRUE	FALSE	Non-significant treatment advantage
GSRS	Placebo	GSRS Subscores- abdominal pain	ENDPT1 vs Baseline	GSRS (Lower is better)	3	['PH002', 'PH004', 'PH005']	3.663	2.883	-0.78	-29.3	-1.217	-1.2552	0.138864	-1.025	-3.436	1.386	Treatment delta < Placebo delta (Lower is better: One-tailed test)	FALSE	TRUE	FALSE	Non-significant treatment advantage
GSRS	Treatment	GSRS Subscores- abdominal pain	ENDPT2 vs Baseline	GSRS (Lower is better)	3	['PH003', 'PH006', 'PH009']	3.22	1.223	-1.997	-89.9	0.337	0.7784	0.760101	0.636	-1.688	2.959	Treatment delta < Placebo delta (Lower is better: One-tailed test)	FALSE	FALSE	FALSE	Non-significant placebo advantage
GSRS	Placebo	GSRS Subscores- abdominal pain	ENDPT2 vs Baseline	GSRS (Lower is better)	3	['PH002', 'PH004', 'PH005']	3.663	1.33	-2.333	-87.6	0.337	0.7784	0.760101	0.636	-1.688	2.959	Treatment delta < Placebo delta (Lower is better: One-tailed test)	FALSE	FALSE	FALSE	Non-significant placebo advantage
GSRS	Treatment	GSRS Subscores- abdominal pain	ENDPT3 vs Baseline	GSRS (Lower is better)	3	['PH003', 'PH006', 'PH009']	3.22	1.223	-1.997	-89.9	0.39	0.7839	0.761554	0.64	-1.684	2.964	Treatment delta < Placebo delta (Lower is better: One-tailed test)	FALSE	FALSE	FALSE	Non-significant placebo advantage
GSRS	Placebo	GSRS Subscores- abdominal pain	ENDPT3 vs Baseline	GSRS (Lower is better)	3	['PH002', 'PH004', 'PH005']	3.663	1.277	-2.387	-89.6	0.39	0.7839	0.761554	0.64	-1.684	2.964	Treatment delta < Placebo delta (Lower is better: One-tailed test)	FALSE	FALSE	FALSE	Non-significant placebo advantage
GSRS	Treatment	GSRS Subscores- average of all questions	ENDPT1 vs Baseline	GSRS (Lower is better)	3	['PH003', 'PH006', 'PH009']	3.91	1.58	-2.33	-80.1	-1.26	-1.0408	0.178375	-0.85	-3.217	1.517	Treatment delta < Placebo delta (Lower is better: One-tailed test)	FALSE	TRUE	FALSE	Non-significant treatment advantage
GSRS	Placebo	GSRS Subscores- average of all questions	ENDPT1 vs Baseline	GSRS (Lower is better)	3	['PH002', 'PH004', 'PH005']	4.4	3.33	-1.07	-31.5	-1.26	-1.0408	0.178375	-0.85	-3.217	1.517	Treatment delta < Placebo delta (Lower is better: One-tailed test)	FALSE	TRUE	FALSE	Non-significant treatment advantage
GSRS	Treatment	GSRS Subscores- average of all questions	ENDPT2 vs Baseline	GSRS (Lower is better)	3	['PH003', 'PH006', 'PH009']	3.91	1.375	-2.535	-87.1	-0.055	-0.0638	0.476113	-0.052	-2.319	2.215	Treatment delta < Placebo delta (Lower is better: One-tailed test)	FALSE	TRUE	FALSE	Non-significant treatment advantage
GSRS	Placebo	GSRS Subscores- average of all questions	ENDPT2 vs Baseline	GSRS (Lower is better)	3	['PH002', 'PH004', 'PH005']	4.4	1.92	-2.48	-72.9	-0.055	-0.0638	0.476113	-0.052	-2.319	2.215	Treatment delta < Placebo delta (Lower is better: One-tailed test)	FALSE	TRUE	FALSE	Non-significant treatment advantage
GSRS	Treatment	GSRS Subscores- average of all questions	ENDPT3 vs Baseline	GSRS (Lower is better)	3	['PH003', 'PH006', 'PH009']	3.91	1.243	-2.667	-91.6	-0.01	-0.0115	0.495674	-0.009	-2.276	2.258	Treatment delta < Placebo delta (Lower is better: One-tailed test)	FALSE	TRUE	FALSE	Non-significant treatment advantage
GSRS	Placebo	GSRS Subscores- average of all questions	ENDPT3 vs Baseline	GSRS (Lower is better)	3	['PH002', 'PH004', 'PH005']	4.4	1.743	-2.657	-78.1	-0.01	-0.0115	0.495674	-0.009	-2.276	2.258	Treatment delta < Placebo delta (Lower is better: One-tailed test)	FALSE	TRUE	FALSE	Non-significant treatment advantage
GSRS	Treatment	GSRS Subscores- constipation	ENDPT1 vs Baseline	GSRS (Lower is better)	3	['PH003', 'PH006', 'PH009']	5.89	1.78	-4.11	-84	-3.11	-2.1332	0.049923	-1.742	-4.404	0.921	Treatment delta < Placebo delta (Lower is better: One-tailed test)	TRUE	TRUE	TRUE	Significant treatment advantage
GSRS	Placebo	GSRS Subscores- constipation	ENDPT1 vs Baseline	GSRS (Lower is better)	3	['PH002', 'PH004', 'PH005']	4.773	3.773	-1	-26.5	-3.11	-2.1332	0.049923	-1.742	-4.404	0.921	Treatment delta < Placebo delta (Lower is better: One-tailed test)	TRUE	TRUE	TRUE	Significant treatment advantage
GSRS	Treatment	GSRS Subscores- constipation	ENDPT2 vs Baseline	GSRS (Lower is better)	3	['PH003', 'PH006', 'PH009']	5.89	1.447	-4.443	-90.9	-2.777	-1.7341	0.078964	-1.416	-3.951	1.119	Treatment delta < Placebo delta (Lower is better: One-tailed test)	FALSE	TRUE	FALSE	Non-significant treatment advantage
GSRS	Placebo	GSRS Subscores- constipation	ENDPT2 vs Baseline	GSRS (Lower is better)	3	['PH002', 'PH004', 'PH005']	4.773	3.107	-1.667	-44.2	-2.777	-1.7341	0.078964	-1.416	-3.951	1.119	Treatment delta < Placebo delta (Lower is better: One-tailed test)	FALSE	TRUE	FALSE	Non-significant treatment advantage
GSRS	Treatment	GSRS Subscores- constipation	ENDPT3 vs Baseline	GSRS (Lower is better)	3	['PH003', 'PH006', 'PH009']	5.89	1.223	-4.667	-95.4	-2.727	-1.5646	0.096364	-1.277	-3.765	1.21	Treatment delta < Placebo delta (Lower is better: One-tailed test)	FALSE	TRUE	FALSE	Non-significant treatment advantage
GSRS	Placebo	GSRS Subscores- constipation	ENDPT3 vs Baseline	GSRS (Lower is better)	3	['PH002', 'PH004', 'PH005']	4.773	2.833	-1.94	-51.4	-2.727	-1.5646	0.096364	-1.277	-3.765	1.21	Treatment delta < Placebo delta (Lower is better: One-tailed test)	FALSE	TRUE	FALSE	Non-significant treatment advantage
GSRS	Treatment	GSRS Subscores- diarrhea	ENDPT1 vs Baseline	GSRS (Lower is better)	3	['PH003', 'PH006', 'PH009']	4	1.11	-2.89	-96.3	-1.667	-0.8524	0.221013	-0.696	-3.031	1.639	Treatment delta < Placebo delta (Lower is better: One-tailed test)	FALSE	TRUE	FALSE	Non-significant treatment advantage
GSRS	Placebo	GSRS Subscores- diarrhea	ENDPT1 vs Baseline	GSRS (Lower is better)	3	['PH002', 'PH004', 'PH005']	4.22	2.997	-1.223	-38	-1.667	-0.8524	0.221013	-0.696	-3.031	1.639	Treatment delta < Placebo delta (Lower is better: One-tailed test)	FALSE	TRUE	FALSE	Non-significant treatment advantage
GSRS	Treatment	GSRS Subscores- diarrhea	ENDPT2 vs Baseline	GSRS (Lower is better)	3	['PH003', 'PH006', 'PH009']	4	1.11	-2.89	-96.3	-0.447	-0.2098	0.422023	-0.171	-2.442	2.1	Treatment delta < Placebo delta (Lower is better: One-tailed test)	FALSE	TRUE	FALSE	Non-significant treatment advantage
GSRS	Placebo	GSRS Subscores- diarrhea	ENDPT2 vs Baseline	GSRS (Lower is better)	3	['PH002', 'PH004', 'PH005']	4.22	1.777	-2.443	-75.9	-0.447	-0.2098	0.422023	-0.171	-2.442	2.1	Treatment delta < Placebo delta (Lower is better: One-tailed test)	FALSE	TRUE	FALSE	Non-significant treatment advantage
GSRS	Treatment	GSRS Subscores- diarrhea	ENDPT3 vs Baseline	GSRS (Lower is better)	3	['PH003', 'PH006', 'PH009']	4	1.11	-2.89	-96.3	-0.28	-0.1369	0.448879	-0.112	-2.38	2.157	Treatment delta < Placebo delta (Lower is better: One-tailed test)	FALSE	TRUE	FALSE	Non-significant treatment advantage
GSRS	Placebo	GSRS Subscores- diarrhea	ENDPT3 vs Baseline	GSRS (Lower is better)	3	['PH002', 'PH004', 'PH005']	4.22	1.61	-2.61	-81.1	-0.28	-0.1369	0.448879	-0.112	-2.38	2.157	Treatment delta < Placebo delta (Lower is better: One-tailed test)	FALSE	TRUE	FALSE	Non-significant treatment advantage
GSRS	Treatment	GSRS Subscores- indigestion	ENDPT1 vs Baseline	GSRS (Lower is better)	3	['PH003', 'PH006', 'PH009']	4.167	2.333	-1.833	-57.9	-0.917	-0.9104	0.207063	-0.743	-3.087	1.601	Treatment delta < Placebo delta (Lower is better: One-tailed test)	FALSE	TRUE	FALSE	Non-significant treatment advantage
GSRS	Placebo	GSRS Subscores- indigestion	ENDPT1 vs Baseline	GSRS (Lower is better)	3	['PH002', 'PH004', 'PH005']	4.75	3.833	-0.917	-24.4	-0.917	-0.9104	0.207063	-0.743	-3.087	1.601	Treatment delta < Placebo delta (Lower is better: One-tailed test)	FALSE	TRUE	FALSE	Non-significant treatment advantage
GSRS	Treatment	GSRS Subscores- indigestion	ENDPT2 vs Baseline	GSRS (Lower is better)	3	['PH003', 'PH006', 'PH009']	4.167	1.833	-2.333	-73.7	0.46	0.333	0.622079	0.272	-2.005	2.549	Treatment delta < Placebo delta (Lower is better: One-tailed test)	FALSE	FALSE	FALSE	Non-significant placebo advantage
GSRS	Placebo	GSRS Subscores- indigestion	ENDPT2 vs Baseline	GSRS (Lower is better)	3	['PH002', 'PH004', 'PH005']	4.75	1.957	-2.793	-74.5	0.46	0.333	0.622079	0.272	-2.005	2.549	Treatment delta < Placebo delta (Lower is better: One-tailed test)	FALSE	FALSE	FALSE	Non-significant placebo advantage
GSRS	Treatment	GSRS Subscores- indigestion	ENDPT3 vs Baseline	GSRS (Lower is better)	3	['PH003', 'PH006', 'PH009']	4.167	1.417	-2.75	-86.8	0.25	0.2402	0.589006	0.196	-2.076	2.469	Treatment delta < Placebo delta (Lower is better: One-tailed test)	FALSE	FALSE	FALSE	Non-significant placebo advantage
GSRS	Placebo	GSRS Subscores- indigestion	ENDPT3 vs Baseline	GSRS (Lower is better)	3	['PH002', 'PH004', 'PH005']	4.75	1.75	-3	-80	0.25	0.2402	0.589006	0.196	-2.076	2.469	Treatment delta < Placebo delta (Lower is better: One-tailed test)	FALSE	FALSE	FALSE	Non-significant placebo advantage
GSRS	Treatment	GSRS Subscores- reflux	ENDPT1 vs Baseline	GSRS (Lower is better)	3	['PH003', 'PH006', 'PH009']	1.333	1	-0.333	-100	1	0.7276	0.746421	0.594	-1.722	2.911	Treatment delta < Placebo delta (Lower is better: One-tailed test)	FALSE	FALSE	FALSE	Non-significant placebo advantage
GSRS	Placebo	GSRS Subscores- reflux	ENDPT1 vs Baseline	GSRS (Lower is better)	3	['PH002', 'PH004', 'PH005']	4.167	2.833	-1.333	-42.1	1	0.7276	0.746421	0.594	-1.722	2.911	Treatment delta < Placebo delta (Lower is better: One-tailed test)	FALSE	FALSE	FALSE	Non-significant placebo advantage
GSRS	Treatment	GSRS Subscores- reflux	ENDPT2 vs Baseline	GSRS (Lower is better)	3	['PH003', 'PH006', 'PH009']	1.333	1	-0.333	-100	2.667	2.44	0.964395	1.992	-0.781	4.765	Treatment delta < Placebo delta (Lower is better: One-tailed test)	FALSE	FALSE	FALSE	Non-significant placebo advantage
GSRS	Placebo	GSRS Subscores- reflux	ENDPT2 vs Baseline	GSRS (Lower is better)	3	['PH002', 'PH004', 'PH005']	4.167	1.167	-3	-94.7	2.667	2.44	0.964395	1.992	-0.781	4.765	Treatment delta < Placebo delta (Lower is better: One-tailed test)	FALSE	FALSE	FALSE	Non-significant placebo advantage
GSRS	Treatment	GSRS Subscores- reflux	ENDPT3 vs Baseline	GSRS (Lower is better)	3	['PH003', 'PH006', 'PH009']	1.333	1.167	-0.167	-50	3	2.7136	0.973331	2.216	-0.664	5.095	Treatment delta < Placebo delta (Lower is better: One-tailed test)	FALSE	FALSE	FALSE	Non-significant placebo advantage
GSRS	Placebo	GSRS Subscores- reflux	ENDPT3 vs Baseline	GSRS (Lower is better)	3	['PH002', 'PH004', 'PH005']	4.167	1	-3.167	-100	3	2.7136	0.973331	2.216	-0.664	5.095	Treatment delta < Placebo delta (Lower is better: One-tailed test)	FALSE	FALSE	FALSE	Non-significant placebo advantage
FLACC	Treatment	Activity	ENDPT1 vs Baseline	Clinical Scale (Lower is better)	3	['PH003', 'PH006', 'PH009']	1	0.333	-0.667	-66.7	-0.333	-0.7071	0.259259	-0.577	-2.891	1.736	Treatment delta < Placebo delta (Lower is better: One-tailed test)	FALSE	TRUE	FALSE	Non-significant treatment advantage
FLACC	Placebo	Activity	ENDPT1 vs Baseline	Clinical Scale (Lower is better)	3	['PH002', 'PH004', 'PH005']	1	0.667	-0.333	-33.3	-0.333	-0.7071	0.259259	-0.577	-2.891	1.736	Treatment delta < Placebo delta (Lower is better: One-tailed test)	FALSE	TRUE	FALSE	Non-significant treatment advantage
FLACC	Treatment	Activity	ENDPT2 vs Baseline	Clinical Scale (Lower is better)	3	['PH003', 'PH006', 'PH009']	1	0.333	-0.667	-66.7	-0.333	-0.7071	0.259259	-0.577	-2.891	1.736	Treatment delta < Placebo delta (Lower is better: One-tailed test)	FALSE	TRUE	FALSE	Non-significant treatment advantage
FLACC	Placebo	Activity	ENDPT2 vs Baseline	Clinical Scale (Lower is better)	3	['PH002', 'PH004', 'PH005']	1	0.667	-0.333	-33.3	-0.333	-0.7071	0.259259	-0.577	-2.891	1.736	Treatment delta < Placebo delta (Lower is better: One-tailed test)	FALSE	TRUE	FALSE	Non-significant treatment advantage
FLACC	Treatment	Activity	ENDPT3 vs Baseline	Clinical Scale (Lower is better)	3	['PH003', 'PH006', 'PH009']	1	0.333	-0.667	-66.7	0.333	1	0.81305	0.816	-1.543	3.176	Treatment delta < Placebo delta (Lower is better: One-tailed test)	FALSE	FALSE	FALSE	Non-significant placebo advantage
FLACC	Placebo	Activity	ENDPT3 vs Baseline	Clinical Scale (Lower is better)	3	['PH002', 'PH004', 'PH005']	1	0	-1	-100	0.333	1	0.81305	0.816	-1.543	3.176	Treatment delta < Placebo delta (Lower is better: One-tailed test)	FALSE	FALSE	FALSE	Non-significant placebo advantage
FLACC	Treatment	Consolability	ENDPT1 vs Baseline	Clinical Scale (Lower is better)	3	['PH003', 'PH006', 'PH009']	1.333	0.333	-1	-75	-0.333	-1	0.18695	-0.816	-3.176	1.543	Treatment delta < Placebo delta (Lower is better: One-tailed test)	FALSE	TRUE	FALSE	Non-significant treatment advantage
FLACC	Placebo	Consolability	ENDPT1 vs Baseline	Clinical Scale (Lower is better)	3	['PH002', 'PH004', 'PH005']	1.333	0.667	-0.667	-50	-0.333	-1	0.18695	-0.816	-3.176	1.543	Treatment delta < Placebo delta (Lower is better: One-tailed test)	FALSE	TRUE	FALSE	Non-significant treatment advantage
FLACC	Treatment	Consolability	ENDPT2 vs Baseline	Clinical Scale (Lower is better)	3	['PH003', 'PH006', 'PH009']	1.333	0.333	-1	-75	0	0	0.5	0	-2.267	2.267	Treatment delta < Placebo delta (Lower is better: One-tailed test)	FALSE	FALSE	FALSE	Non-significant no meaningful difference
FLACC	Placebo	Consolability	ENDPT2 vs Baseline	Clinical Scale (Lower is better)	3	['PH002', 'PH004', 'PH005']	1.333	0.333	-1	-75	0	0	0.5	0	-2.267	2.267	Treatment delta < Placebo delta (Lower is better: One-tailed test)	FALSE	FALSE	FALSE	Non-significant no meaningful difference
FLACC	Treatment	Consolability	ENDPT3 vs Baseline	Clinical Scale (Lower is better)	3	['PH003', 'PH006', 'PH009']	1.333	0.333	-1	-75	-0.333	-1	0.18695	-0.816	-3.176	1.543	Treatment delta < Placebo delta (Lower is better: One-tailed test)	FALSE	TRUE	FALSE	Non-significant treatment advantage
FLACC	Placebo	Consolability	ENDPT3 vs Baseline	Clinical Scale (Lower is better)	3	['PH002', 'PH004', 'PH005']	1.333	0.667	-0.667	-50	-0.333	-1	0.18695	-0.816	-3.176	1.543	Treatment delta < Placebo delta (Lower is better: One-tailed test)	FALSE	TRUE	FALSE	Non-significant treatment advantage
FLACC	Treatment	Cry	ENDPT1 vs Baseline	Clinical Scale (Lower is better)	3	['PH003', 'PH006', 'PH009']	1	0.333	-0.667	-66.7	0	0	0.5	0	-2.267	2.267	Treatment delta < Placebo delta (Lower is better: One-tailed test)	FALSE	FALSE	FALSE	Non-significant no meaningful difference
FLACC	Placebo	Cry	ENDPT1 vs Baseline	Clinical Scale (Lower is better)	3	['PH002', 'PH004', 'PH005']	1	0.333	-0.667	-66.7	0	0	0.5	0	-2.267	2.267	Treatment delta < Placebo delta (Lower is better: One-tailed test)	FALSE	FALSE	FALSE	Non-significant no meaningful difference
FLACC	Treatment	Cry	ENDPT2 vs Baseline	Clinical Scale (Lower is better)	3	['PH003', 'PH006', 'PH009']	1	0.333	-0.667	-66.7	0	0	0.5	0	-2.267	2.267	Treatment delta < Placebo delta (Lower is better: One-tailed test)	FALSE	FALSE	FALSE	Non-significant no meaningful difference
FLACC	Placebo	Cry	ENDPT2 vs Baseline	Clinical Scale (Lower is better)	3	['PH002', 'PH004', 'PH005']	1	0.333	-0.667	-66.7	0	0	0.5	0	-2.267	2.267	Treatment delta < Placebo delta (Lower is better: One-tailed test)	FALSE	FALSE	FALSE	Non-significant no meaningful difference
FLACC	Treatment	Cry	ENDPT3 vs Baseline	Clinical Scale (Lower is better)	3	['PH003', 'PH006', 'PH009']	1	0.333	-0.667	-66.7	-0.333	-0.7071	0.259259	-0.577	-2.891	1.736	Treatment delta < Placebo delta (Lower is better: One-tailed test)	FALSE	TRUE	FALSE	Non-significant treatment advantage
FLACC	Placebo	Cry	ENDPT3 vs Baseline	Clinical Scale (Lower is better)	3	['PH002', 'PH004', 'PH005']	1	0.667	-0.333	-33.3	-0.333	-0.7071	0.259259	-0.577	-2.891	1.736	Treatment delta < Placebo delta (Lower is better: One-tailed test)	FALSE	TRUE	FALSE	Non-significant treatment advantage
FLACC	Treatment	Face	ENDPT1 vs Baseline	Clinical Scale (Lower is better)	3	['PH003', 'PH006', 'PH009']	1.333	0.333	-1	-75	-0.667	-1	0.18695	-0.816	-3.176	1.543	Treatment delta < Placebo delta (Lower is better: One-tailed test)	FALSE	TRUE	FALSE	Non-significant treatment advantage
FLACC	Placebo	Face	ENDPT1 vs Baseline	Clinical Scale (Lower is better)	3	['PH002', 'PH004', 'PH005']	1	0.667	-0.333	-33.3	-0.667	-1	0.18695	-0.816	-3.176	1.543	Treatment delta < Placebo delta (Lower is better: One-tailed test)	FALSE	TRUE	FALSE	Non-significant treatment advantage
FLACC	Treatment	Face	ENDPT2 vs Baseline	Clinical Scale (Lower is better)	3	['PH003', 'PH006', 'PH009']	1.333	0.333	-1	-75	-0.333	-0.5	0.321665	-0.408	-2.699	1.882	Treatment delta < Placebo delta (Lower is better: One-tailed test)	FALSE	TRUE	FALSE	Non-significant treatment advantage
FLACC	Placebo	Face	ENDPT2 vs Baseline	Clinical Scale (Lower is better)	3	['PH002', 'PH004', 'PH005']	1	0.333	-0.667	-66.7	-0.333	-0.5	0.321665	-0.408	-2.699	1.882	Treatment delta < Placebo delta (Lower is better: One-tailed test)	FALSE	TRUE	FALSE	Non-significant treatment advantage
FLACC	Treatment	Face	ENDPT3 vs Baseline	Clinical Scale (Lower is better)	3	['PH003', 'PH006', 'PH009']	1.333	0.333	-1	-75	0	0	0.5	0	-2.267	2.267	Treatment delta < Placebo delta (Lower is better: One-tailed test)	FALSE	FALSE	FALSE	Non-significant no meaningful difference
FLACC	Placebo	Face	ENDPT3 vs Baseline	Clinical Scale (Lower is better)	3	['PH002', 'PH004', 'PH005']	1	0	-1	-100	0	0	0.5	0	-2.267	2.267	Treatment delta < Placebo delta (Lower is better: One-tailed test)	FALSE	FALSE	FALSE	Non-significant no meaningful difference
FLACC	Treatment	Legs	ENDPT1 vs Baseline	Clinical Scale (Lower is better)	3	['PH003', 'PH006', 'PH009']	1	0.333	-0.667	-66.7	0	0	0.5	0	-2.267	2.267	Treatment delta < Placebo delta (Lower is better: One-tailed test)	FALSE	FALSE	FALSE	Non-significant no meaningful difference
FLACC	Placebo	Legs	ENDPT1 vs Baseline	Clinical Scale (Lower is better)	3	['PH002', 'PH004', 'PH005']	1.333	0.667	-0.667	-50	0	0	0.5	0	-2.267	2.267	Treatment delta < Placebo delta (Lower is better: One-tailed test)	FALSE	FALSE	FALSE	Non-significant no meaningful difference
FLACC	Treatment	Legs	ENDPT2 vs Baseline	Clinical Scale (Lower is better)	3	['PH003', 'PH006', 'PH009']	1	0.333	-0.667	-66.7	0.667	1.4142	0.8849	1.155	-1.294	3.603	Treatment delta < Placebo delta (Lower is better: One-tailed test)	FALSE	FALSE	FALSE	Non-significant placebo advantage
FLACC	Placebo	Legs	ENDPT2 vs Baseline	Clinical Scale (Lower is better)	3	['PH002', 'PH004', 'PH005']	1.333	0	-1.333	-100	0.667	1.4142	0.8849	1.155	-1.294	3.603	Treatment delta < Placebo delta (Lower is better: One-tailed test)	FALSE	FALSE	FALSE	Non-significant placebo advantage
FLACC	Treatment	Legs	ENDPT3 vs Baseline	Clinical Scale (Lower is better)	3	['PH003', 'PH006', 'PH009']	1	0.333	-0.667	-66.7	0.667	1.4142	0.8849	1.155	-1.294	3.603	Treatment delta < Placebo delta (Lower is better: One-tailed test)	FALSE	FALSE	FALSE	Non-significant placebo advantage
FLACC	Placebo	Legs	ENDPT3 vs Baseline	Clinical Scale (Lower is better)	3	['PH002', 'PH004', 'PH005']	1.333	0	-1.333	-100	0.667	1.4142	0.8849	1.155	-1.294	3.603	Treatment delta < Placebo delta (Lower is better: One-tailed test)	FALSE	FALSE	FALSE	Non-significant placebo advantage
FLACC	Treatment	Total Score	ENDPT1 vs Baseline	Clinical Scale (Lower is better)	3	['PH003', 'PH006', 'PH009']	5.667	1.667	-4	-70.6	-1.333	-0.686	0.265206	-0.56	-2.871	1.751	Treatment delta < Placebo delta (Lower is better: One-tailed test)	FALSE	TRUE	FALSE	Non-significant treatment advantage
FLACC	Placebo	Total Score	ENDPT1 vs Baseline	Clinical Scale (Lower is better)	3	['PH002', 'PH004', 'PH005']	5.667	3	-2.667	-47.1	-1.333	-0.686	0.265206	-0.56	-2.871	1.751	Treatment delta < Placebo delta (Lower is better: One-tailed test)	FALSE	TRUE	FALSE	Non-significant treatment advantage
FLACC	Treatment	Total Score	ENDPT2 vs Baseline	Clinical Scale (Lower is better)	3	['PH003', 'PH006', 'PH009']	5.667	1.667	-4	-70.6	0	0	0.5	0	-2.267	2.267	Treatment delta < Placebo delta (Lower is better: One-tailed test)	FALSE	FALSE	FALSE	Non-significant no meaningful difference
FLACC	Placebo	Total Score	ENDPT2 vs Baseline	Clinical Scale (Lower is better)	3	['PH002', 'PH004', 'PH005']	5.667	1.667	-4	-70.6	0	0	0.5	0	-2.267	2.267	Treatment delta < Placebo delta (Lower is better: One-tailed test)	FALSE	FALSE	FALSE	Non-significant no meaningful difference
FLACC	Treatment	Total Score	ENDPT3 vs Baseline	Clinical Scale (Lower is better)	3	['PH003', 'PH006', 'PH009']	5.667	1.667	-4	-70.6	1	0.6547	0.725788	0.535	-1.773	2.842	Treatment delta < Placebo delta (Lower is better: One-tailed test)	FALSE	FALSE	FALSE	Non-significant placebo advantage
FLACC	Placebo	Total Score	ENDPT3 vs Baseline	Clinical Scale (Lower is better)	3	['PH002', 'PH004', 'PH005']	5.667	0.667	-5	-88.2	1	0.6547	0.725788	0.535	-1.773	2.842	Treatment delta < Placebo delta (Lower is better: One-tailed test)	FALSE	FALSE	FALSE	Non-significant placebo advantage
DSR	Treatment	# days 4+ BMs	ENDPT1 vs Baseline	Clinical Scale (Lower is better)	3	['PH003', 'PH006', 'PH009']	0.667	0	-0.667	-100	-0.333	-0.4472	0.338934	-0.365	-2.651	1.921	Treatment delta < Placebo delta (Lower is better: One-tailed test)	FALSE	TRUE	FALSE	Non-significant treatment advantage
DSR	Placebo	# days 4+ BMs	ENDPT1 vs Baseline	Clinical Scale (Lower is better)	3	['PH002', 'PH004', 'PH005']	1	0.667	-0.333	-33.3	-0.333	-0.4472	0.338934	-0.365	-2.651	1.921	Treatment delta < Placebo delta (Lower is better: One-tailed test)	FALSE	TRUE	FALSE	Non-significant treatment advantage
DSR	Treatment	# days 4+ BMs	ENDPT2 vs Baseline	Clinical Scale (Lower is better)	3	['PH003', 'PH006', 'PH009']	0.667	0	-0.667	-100	0.333	0.2774	0.602372	0.226	-2.048	2.501	Treatment delta < Placebo delta (Lower is better: One-tailed test)	FALSE	FALSE	FALSE	Non-significant placebo advantage
DSR	Placebo	# days 4+ BMs	ENDPT2 vs Baseline	Clinical Scale (Lower is better)	3	['PH002', 'PH004', 'PH005']	1	0	-1	-100	0.333	0.2774	0.602372	0.226	-2.048	2.501	Treatment delta < Placebo delta (Lower is better: One-tailed test)	FALSE	FALSE	FALSE	Non-significant placebo advantage
DSR	Treatment	# days 4+ BMs	ENDPT3 vs Baseline	Clinical Scale (Lower is better)	3	['PH003', 'PH006', 'PH009']	0.667	0	-0.667	-100	0.333	0.2774	0.602372	0.226	-2.048	2.501	Treatment delta < Placebo delta (Lower is better: One-tailed test)	FALSE	FALSE	FALSE	Non-significant placebo advantage
DSR	Placebo	# days 4+ BMs	ENDPT3 vs Baseline	Clinical Scale (Lower is better)	3	['PH002', 'PH004', 'PH005']	1	0	-1	-100	0.333	0.2774	0.602372	0.226	-2.048	2.501	Treatment delta < Placebo delta (Lower is better: One-tailed test)	FALSE	FALSE	FALSE	Non-significant placebo advantage
DSR	Treatment	# of days 1 or 2	ENDPT1 vs Baseline	Clinical Scale (Lower is better)	3	['PH003', 'PH006', 'PH009']	0.167	1.333	1.167	700	0.833	0.5698	0.700356	0.465	-1.832	2.763	Treatment delta < Placebo delta (Lower is better: One-tailed test)	FALSE	FALSE	FALSE	Non-significant placebo advantage
DSR	Placebo	# of days 1 or 2	ENDPT1 vs Baseline	Clinical Scale (Lower is better)	3	['PH002', 'PH004', 'PH005']	0.333	0.667	0.333	100	0.833	0.5698	0.700356	0.465	-1.832	2.763	Treatment delta < Placebo delta (Lower is better: One-tailed test)	FALSE	FALSE	FALSE	Non-significant placebo advantage
DSR	Treatment	# of days 1 or 2	ENDPT2 vs Baseline	Clinical Scale (Lower is better)	3	['PH003', 'PH006', 'PH009']	0.167	0.667	0.5	300	0.833	1	0.81305	0.816	-1.543	3.176	Treatment delta < Placebo delta (Lower is better: One-tailed test)	FALSE	FALSE	FALSE	Non-significant placebo advantage
DSR	Placebo	# of days 1 or 2	ENDPT2 vs Baseline	Clinical Scale (Lower is better)	3	['PH002', 'PH004', 'PH005']	0.333	0	-0.333	-100	0.833	1	0.81305	0.816	-1.543	3.176	Treatment delta < Placebo delta (Lower is better: One-tailed test)	FALSE	FALSE	FALSE	Non-significant placebo advantage
DSR	Treatment	# of days 1 or 2	ENDPT3 vs Baseline	Clinical Scale (Lower is better)	3	['PH003', 'PH006', 'PH009']	0.167	0.333	0.167	100	-0.5	-0.3906	0.358013	-0.319	-2.6	1.962	Treatment delta < Placebo delta (Lower is better: One-tailed test)	FALSE	TRUE	FALSE	Non-significant treatment advantage
DSR	Placebo	# of days 1 or 2	ENDPT3 vs Baseline	Clinical Scale (Lower is better)	3	['PH002', 'PH004', 'PH005']	0.333	1	0.667	200	-0.5	-0.3906	0.358013	-0.319	-2.6	1.962	Treatment delta < Placebo delta (Lower is better: One-tailed test)	FALSE	TRUE	FALSE	Non-significant treatment advantage
DSR	Treatment	# of days abnormal	ENDPT1 vs Baseline	Clinical Scale (Lower is better)	3	['PH003', 'PH006', 'PH009']	14	11.667	-2.333	-16.7	-2.333	-1.6059	0.091783	-1.311	-3.81	1.187	Treatment delta < Placebo delta (Lower is better: One-tailed test)	FALSE	TRUE	FALSE	Non-significant treatment advantage
DSR	Placebo	# of days abnormal	ENDPT1 vs Baseline	Clinical Scale (Lower is better)	3	['PH002', 'PH004', 'PH005']	14	14	0	0	-2.333	-1.6059	0.091783	-1.311	-3.81	1.187	Treatment delta < Placebo delta (Lower is better: One-tailed test)	FALSE	TRUE	FALSE	Non-significant treatment advantage
DSR	Treatment	# of days abnormal	ENDPT2 vs Baseline	Clinical Scale (Lower is better)	3	['PH003', 'PH006', 'PH009']	14	12	-2	-14.3	1	0.2774	0.602372	0.226	-2.048	2.501	Treatment delta < Placebo delta (Lower is better: One-tailed test)	FALSE	FALSE	FALSE	Non-significant placebo advantage
DSR	Placebo	# of days abnormal	ENDPT2 vs Baseline	Clinical Scale (Lower is better)	3	['PH002', 'PH004', 'PH005']	14	11	-3	-21.4	1	0.2774	0.602372	0.226	-2.048	2.501	Treatment delta < Placebo delta (Lower is better: One-tailed test)	FALSE	FALSE	FALSE	Non-significant placebo advantage
DSR	Treatment	# of days abnormal	ENDPT3 vs Baseline	Clinical Scale (Lower is better)	3	['PH003', 'PH006', 'PH009']	14	11	-3	-21.4	-3	-1	0.18695	-0.816	-3.176	1.543	Treatment delta < Placebo delta (Lower is better: One-tailed test)	FALSE	TRUE	FALSE	Non-significant treatment advantage
DSR	Placebo	# of days abnormal	ENDPT3 vs Baseline	Clinical Scale (Lower is better)	3	['PH002', 'PH004', 'PH005']	14	14	0	0	-3	-1	0.18695	-0.816	-3.176	1.543	Treatment delta < Placebo delta (Lower is better: One-tailed test)	FALSE	TRUE	FALSE	Non-significant treatment advantage
DSR	Treatment	# of days no stool	ENDPT1 vs Baseline	Clinical Scale (Lower is better)	3	['PH003', 'PH006', 'PH009']	3.333	4.333	1	30	2.667	1.5119	0.897447	1.234	-1.239	3.708	Treatment delta < Placebo delta (Lower is better: One-tailed test)	FALSE	FALSE	FALSE	Non-significant placebo advantage
DSR	Placebo	# of days no stool	ENDPT1 vs Baseline	Clinical Scale (Lower is better)	3	['PH002', 'PH004', 'PH005']	3.667	2	-1.667	-45.5	2.667	1.5119	0.897447	1.234	-1.239	3.708	Treatment delta < Placebo delta (Lower is better: One-tailed test)	FALSE	FALSE	FALSE	Non-significant placebo advantage
DSR	Treatment	# of days no stool	ENDPT2 vs Baseline	Clinical Scale (Lower is better)	3	['PH003', 'PH006', 'PH009']	3.333	4.333	1	30	2.667	1.1795	0.848226	0.963	-1.432	3.358	Treatment delta < Placebo delta (Lower is better: One-tailed test)	FALSE	FALSE	FALSE	Non-significant placebo advantage
DSR	Placebo	# of days no stool	ENDPT2 vs Baseline	Clinical Scale (Lower is better)	3	['PH002', 'PH004', 'PH005']	3.667	2	-1.667	-45.5	2.667	1.1795	0.848226	0.963	-1.432	3.358	Treatment delta < Placebo delta (Lower is better: One-tailed test)	FALSE	FALSE	FALSE	Non-significant placebo advantage
DSR	Treatment	# of days no stool	ENDPT3 vs Baseline	Clinical Scale (Lower is better)	3	['PH003', 'PH006', 'PH009']	3.333	4	0.667	20	1.333	0.9701	0.806544	0.792	-1.562	3.146	Treatment delta < Placebo delta (Lower is better: One-tailed test)	FALSE	FALSE	FALSE	Non-significant placebo advantage
DSR	Placebo	# of days no stool	ENDPT3 vs Baseline	Clinical Scale (Lower is better)	3	['PH002', 'PH004', 'PH005']	3.667	3	-0.667	-18.2	1.333	0.9701	0.806544	0.792	-1.562	3.146	Treatment delta < Placebo delta (Lower is better: One-tailed test)	FALSE	FALSE	FALSE	Non-significant placebo advantage
DSR Abnormal Events	Treatment	# days 4+ BMs	ENDPT1 vs Baseline	Clinical Scale (Lower is better)	3	['PH003', 'PH006', 'PH009']	0.667	0	-0.667	-100	-0.333	-0.4472	0.338934	-0.365	-2.651	1.921	Treatment delta < Placebo delta (Lower is better: One-tailed test)	FALSE	TRUE	FALSE	Non-significant treatment advantage
DSR Abnormal Events	Placebo	# days 4+ BMs	ENDPT1 vs Baseline	Clinical Scale (Lower is better)	3	['PH002', 'PH004', 'PH005']	1	0.667	-0.333	-33.3	-0.333	-0.4472	0.338934	-0.365	-2.651	1.921	Treatment delta < Placebo delta (Lower is better: One-tailed test)	FALSE	TRUE	FALSE	Non-significant treatment advantage
DSR Abnormal Events	Treatment	# days 4+ BMs	ENDPT2 vs Baseline	Clinical Scale (Lower is better)	3	['PH003', 'PH006', 'PH009']	0.667	0	-0.667	-100	0.333	0.2774	0.602372	0.226	-2.048	2.501	Treatment delta < Placebo delta (Lower is better: One-tailed test)	FALSE	FALSE	FALSE	Non-significant placebo advantage
DSR Abnormal Events	Placebo	# days 4+ BMs	ENDPT2 vs Baseline	Clinical Scale (Lower is better)	3	['PH002', 'PH004', 'PH005']	1	0	-1	-100	0.333	0.2774	0.602372	0.226	-2.048	2.501	Treatment delta < Placebo delta (Lower is better: One-tailed test)	FALSE	FALSE	FALSE	Non-significant placebo advantage
DSR Abnormal Events	Treatment	# days 4+ BMs	ENDPT3 vs Baseline	Clinical Scale (Lower is better)	3	['PH003', 'PH006', 'PH009']	0.667	0.333	-0.333	-50	0.667	0.6325	0.719281	0.516	-1.788	2.821	Treatment delta < Placebo delta (Lower is better: One-tailed test)	FALSE	FALSE	FALSE	Non-significant placebo advantage
DSR Abnormal Events	Placebo	# days 4+ BMs	ENDPT3 vs Baseline	Clinical Scale (Lower is better)	3	['PH002', 'PH004', 'PH005']	1	0	-1	-100	0.667	0.6325	0.719281	0.516	-1.788	2.821	Treatment delta < Placebo delta (Lower is better: One-tailed test)	FALSE	FALSE	FALSE	Non-significant placebo advantage
DSR Abnormal Events	Treatment	# of days 1 or 2	ENDPT1 vs Baseline	Clinical Scale (Lower is better)	3	['PH003', 'PH006', 'PH009']	0.167	1.333	1.167	700	0.833	0.5698	0.700356	0.465	-1.832	2.763	Treatment delta < Placebo delta (Lower is better: One-tailed test)	FALSE	FALSE	FALSE	Non-significant placebo advantage
DSR Abnormal Events	Placebo	# of days 1 or 2	ENDPT1 vs Baseline	Clinical Scale (Lower is better)	3	['PH002', 'PH004', 'PH005']	0.333	0.667	0.333	100	0.833	0.5698	0.700356	0.465	-1.832	2.763	Treatment delta < Placebo delta (Lower is better: One-tailed test)	FALSE	FALSE	FALSE	Non-significant placebo advantage
DSR Abnormal Events	Treatment	# of days 1 or 2	ENDPT2 vs Baseline	Clinical Scale (Lower is better)	3	['PH003', 'PH006', 'PH009']	0.167	0.667	0.5	300	0.833	1	0.81305	0.816	-1.543	3.176	Treatment delta < Placebo delta (Lower is better: One-tailed test)	FALSE	FALSE	FALSE	Non-significant placebo advantage
DSR Abnormal Events	Placebo	# of days 1 or 2	ENDPT2 vs Baseline	Clinical Scale (Lower is better)	3	['PH002', 'PH004', 'PH005']	0.333	0	-0.333	-100	0.833	1	0.81305	0.816	-1.543	3.176	Treatment delta < Placebo delta (Lower is better: One-tailed test)	FALSE	FALSE	FALSE	Non-significant placebo advantage
DSR Abnormal Events	Treatment	# of days 1 or 2	ENDPT3 vs Baseline	Clinical Scale (Lower is better)	3	['PH003', 'PH006', 'PH009']	0.167	0.333	0.167	100	-0.5	-0.3906	0.358013	-0.319	-2.6	1.962	Treatment delta < Placebo delta (Lower is better: One-tailed test)	FALSE	TRUE	FALSE	Non-significant treatment advantage
DSR Abnormal Events	Placebo	# of days 1 or 2	ENDPT3 vs Baseline	Clinical Scale (Lower is better)	3	['PH002', 'PH004', 'PH005']	0.333	1	0.667	200	-0.5	-0.3906	0.358013	-0.319	-2.6	1.962	Treatment delta < Placebo delta (Lower is better: One-tailed test)	FALSE	TRUE	FALSE	Non-significant treatment advantage
DSR Abnormal Events	Treatment	# of days 6 or 7	ENDPT1 vs Baseline	Clinical Scale (Lower is better)	3	['PH003', 'PH006', 'PH009']	7.833	6	-1.833	-23.4	-0.167	-0.0371	0.486077	-0.03	-2.297	2.237	Treatment delta < Placebo delta (Lower is better: One-tailed test)	FALSE	TRUE	FALSE	Non-significant treatment advantage
DSR Abnormal Events	Placebo	# of days 6 or 7	ENDPT1 vs Baseline	Clinical Scale (Lower is better)	3	['PH002', 'PH004', 'PH005']	8.667	7	-1.667	-19.2	-0.167	-0.0371	0.486077	-0.03	-2.297	2.237	Treatment delta < Placebo delta (Lower is better: One-tailed test)	FALSE	TRUE	FALSE	Non-significant treatment advantage
DSR Abnormal Events	Treatment	# of days 6 or 7	ENDPT2 vs Baseline	Clinical Scale (Lower is better)	3	['PH003', 'PH006', 'PH009']	7.833	6.333	-1.5	-19.1	2.167	0.5785	0.703029	0.472	-1.826	2.771	Treatment delta < Placebo delta (Lower is better: One-tailed test)	FALSE	FALSE	FALSE	Non-significant placebo advantage
DSR Abnormal Events	Placebo	# of days 6 or 7	ENDPT2 vs Baseline	Clinical Scale (Lower is better)	3	['PH002', 'PH004', 'PH005']	8.667	5	-3.667	-42.3	2.167	0.5785	0.703029	0.472	-1.826	2.771	Treatment delta < Placebo delta (Lower is better: One-tailed test)	FALSE	FALSE	FALSE	Non-significant placebo advantage
DSR Abnormal Events	Treatment	# of days 6 or 7	ENDPT3 vs Baseline	Clinical Scale (Lower is better)	3	['PH003', 'PH006', 'PH009']	7.833	3.333	-4.5	-57.4	-1.5	-0.454	0.336689	-0.371	-2.657	1.916	Treatment delta < Placebo delta (Lower is better: One-tailed test)	FALSE	TRUE	FALSE	Non-significant treatment advantage
DSR Abnormal Events	Placebo	# of days 6 or 7	ENDPT3 vs Baseline	Clinical Scale (Lower is better)	3	['PH002', 'PH004', 'PH005']	8.667	5.667	-3	-34.6	-1.5	-0.454	0.336689	-0.371	-2.657	1.916	Treatment delta < Placebo delta (Lower is better: One-tailed test)	FALSE	TRUE	FALSE	Non-significant treatment advantage
DSR Abnormal Events	Treatment	# of days abnormal	ENDPT1 vs Baseline	Clinical Scale (Lower is better)	3	['PH003', 'PH006', 'PH009']	14	11.667	-2.333	-16.7	-2.333	-1.6059	0.091783	-1.311	-3.81	1.187	Treatment delta < Placebo delta (Lower is better: One-tailed test)	FALSE	TRUE	FALSE	Non-significant treatment advantage
DSR Abnormal Events	Placebo	# of days abnormal	ENDPT1 vs Baseline	Clinical Scale (Lower is better)	3	['PH002', 'PH004', 'PH005']	14	14	0	0	-2.333	-1.6059	0.091783	-1.311	-3.81	1.187	Treatment delta < Placebo delta (Lower is better: One-tailed test)	FALSE	TRUE	FALSE	Non-significant treatment advantage
DSR Abnormal Events	Treatment	# of days abnormal	ENDPT2 vs Baseline	Clinical Scale (Lower is better)	3	['PH003', 'PH006', 'PH009']	14	12	-2	-14.3	0	0	0.5	0	-2.267	2.267	Treatment delta < Placebo delta (Lower is better: One-tailed test)	FALSE	FALSE	FALSE	Non-significant no meaningful difference
DSR Abnormal Events	Placebo	# of days abnormal	ENDPT2 vs Baseline	Clinical Scale (Lower is better)	3	['PH002', 'PH004', 'PH005']	14	12	-2	-14.3	0	0	0.5	0	-2.267	2.267	Treatment delta < Placebo delta (Lower is better: One-tailed test)	FALSE	FALSE	FALSE	Non-significant no meaningful difference
DSR Abnormal Events	Treatment	# of days abnormal	ENDPT3 vs Baseline	Clinical Scale (Lower is better)	3	['PH003', 'PH006', 'PH009']	14	11	-3	-21.4	-3	-1	0.18695	-0.816	-3.176	1.543	Treatment delta < Placebo delta (Lower is better: One-tailed test)	FALSE	TRUE	FALSE	Non-significant treatment advantage
DSR Abnormal Events	Placebo	# of days abnormal	ENDPT3 vs Baseline	Clinical Scale (Lower is better)	3	['PH002', 'PH004', 'PH005']	14	14	0	0	-3	-1	0.18695	-0.816	-3.176	1.543	Treatment delta < Placebo delta (Lower is better: One-tailed test)	FALSE	TRUE	FALSE	Non-significant treatment advantage
DSR Abnormal Events	Treatment	# of days no stool	ENDPT1 vs Baseline	Clinical Scale (Lower is better)	3	['PH003', 'PH006', 'PH009']	3.333	4.333	1	30	2.333	1.6059	0.908217	1.311	-1.187	3.81	Treatment delta < Placebo delta (Lower is better: One-tailed test)	FALSE	FALSE	FALSE	Non-significant placebo advantage
DSR Abnormal Events	Placebo	# of days no stool	ENDPT1 vs Baseline	Clinical Scale (Lower is better)	3	['PH002', 'PH004', 'PH005']	3.667	2.333	-1.333	-36.4	2.333	1.6059	0.908217	1.311	-1.187	3.81	Treatment delta < Placebo delta (Lower is better: One-tailed test)	FALSE	FALSE	FALSE	Non-significant placebo advantage
DSR Abnormal Events	Treatment	# of days no stool	ENDPT2 vs Baseline	Clinical Scale (Lower is better)	3	['PH003', 'PH006', 'PH009']	3.333	4.333	1	30	1.667	1.25	0.86028	1.021	-1.389	3.431	Treatment delta < Placebo delta (Lower is better: One-tailed test)	FALSE	FALSE	FALSE	Non-significant placebo advantage
DSR Abnormal Events	Placebo	# of days no stool	ENDPT2 vs Baseline	Clinical Scale (Lower is better)	3	['PH002', 'PH004', 'PH005']	3.667	3	-0.667	-18.2	1.667	1.25	0.86028	1.021	-1.389	3.431	Treatment delta < Placebo delta (Lower is better: One-tailed test)	FALSE	FALSE	FALSE	Non-significant placebo advantage
DSR Abnormal Events	Treatment	# of days no stool	ENDPT3 vs Baseline	Clinical Scale (Lower is better)	3	['PH003', 'PH006', 'PH009']	3.333	4	0.667	20	1.333	0.9701	0.806544	0.792	-1.562	3.146	Treatment delta < Placebo delta (Lower is better: One-tailed test)	FALSE	FALSE	FALSE	Non-significant placebo advantage
DSR Abnormal Events	Placebo	# of days no stool	ENDPT3 vs Baseline	Clinical Scale (Lower is better)	3	['PH002', 'PH004', 'PH005']	3.667	3	-0.667	-18.2	1.333	0.9701	0.806544	0.792	-1.562	3.146	Treatment delta < Placebo delta (Lower is better: One-tailed test)	FALSE	FALSE	FALSE	Non-significant placebo advantage
DSR Abnormal Events	Treatment	# of days supp/proced/med	ENDPT1 vs Baseline	Clinical Scale (Lower is better)	3	['PH003', 'PH006', 'PH009']	13.333	6.667	-6.667	-50	-6.333	-1.5565	0.097283	-1.271	-3.756	1.214	Treatment delta < Placebo delta (Lower is better: One-tailed test)	FALSE	TRUE	FALSE	Non-significant treatment advantage
DSR Abnormal Events	Placebo	# of days supp/proced/med	ENDPT1 vs Baseline	Clinical Scale (Lower is better)	3	['PH002', 'PH004', 'PH005']	10	9.667	-0.333	-3.3	-6.333	-1.5565	0.097283	-1.271	-3.756	1.214	Treatment delta < Placebo delta (Lower is better: One-tailed test)	FALSE	TRUE	FALSE	Non-significant treatment advantage
DSR Abnormal Events	Treatment	# of days supp/proced/med	ENDPT2 vs Baseline	Clinical Scale (Lower is better)	3	['PH003', 'PH006', 'PH009']	13.333	7	-6.333	-47.5	-5.667	-1.3655	0.121926	-1.115	-3.552	1.322	Treatment delta < Placebo delta (Lower is better: One-tailed test)	FALSE	TRUE	FALSE	Non-significant treatment advantage
DSR Abnormal Events	Placebo	# of days supp/proced/med	ENDPT2 vs Baseline	Clinical Scale (Lower is better)	3	['PH002', 'PH004', 'PH005']	10	9.333	-0.667	-6.7	-5.667	-1.3655	0.121926	-1.115	-3.552	1.322	Treatment delta < Placebo delta (Lower is better: One-tailed test)	FALSE	TRUE	FALSE	Non-significant treatment advantage
DSR Abnormal Events	Treatment	# of days supp/proced/med	ENDPT3 vs Baseline	Clinical Scale (Lower is better)	3	['PH003', 'PH006', 'PH009']	13.333	6.667	-6.667	-50	-10.667	-1.9439	0.061913	-1.587	-4.187	1.012	Treatment delta < Placebo delta (Lower is better: One-tailed test)	FALSE	TRUE	FALSE	Non-significant treatment advantage
DSR Abnormal Events	Placebo	# of days supp/proced/med	ENDPT3 vs Baseline	Clinical Scale (Lower is better)	3	['PH002', 'PH004', 'PH005']	10	14	4	40	-10.667	-1.9439	0.061913	-1.587	-4.187	1.012	Treatment delta < Placebo delta (Lower is better: One-tailed test)	FALSE	TRUE	FALSE	Non-significant treatment advantage
DSR Abnormal Events	Treatment	number of events	ENDPT1 vs Baseline	Clinical Scale (Lower is better)	3	['PH003', 'PH006', 'PH009']	29.667	18.333	-11.333	-38.2	-11	-1.542	0.098969	-1.259	-3.74	1.222	Treatment delta < Placebo delta (Lower is better: One-tailed test)	FALSE	TRUE	FALSE	Non-significant treatment advantage
DSR Abnormal Events	Placebo	number of events	ENDPT1 vs Baseline	Clinical Scale (Lower is better)	3	['PH002', 'PH004', 'PH005']	29	28.667	-0.333	-1.1	-11	-1.542	0.098969	-1.259	-3.74	1.222	Treatment delta < Placebo delta (Lower is better: One-tailed test)	FALSE	TRUE	FALSE	Non-significant treatment advantage
DSR Abnormal Events	Treatment	number of events	ENDPT2 vs Baseline	Clinical Scale (Lower is better)	3	['PH003', 'PH006', 'PH009']	29.667	18.333	-11.333	-38.2	0	0	0.5	0	-2.267	2.267	Treatment delta < Placebo delta (Lower is better: One-tailed test)	FALSE	FALSE	FALSE	Non-significant no meaningful difference
DSR Abnormal Events	Placebo	number of events	ENDPT2 vs Baseline	Clinical Scale (Lower is better)	3	['PH002', 'PH004', 'PH005']	29	17.667	-11.333	-39.1	0	0	0.5	0	-2.267	2.267	Treatment delta < Placebo delta (Lower is better: One-tailed test)	FALSE	FALSE	FALSE	Non-significant no meaningful difference
DSR Abnormal Events	Treatment	number of events	ENDPT3 vs Baseline	Clinical Scale (Lower is better)	3	['PH003', 'PH006', 'PH009']	29.667	14.667	-15	-50.6	-12.333	-1.6923	0.082919	-1.382	-3.905	1.141	Treatment delta < Placebo delta (Lower is better: One-tailed test)	FALSE	TRUE	FALSE	Non-significant treatment advantage
DSR Abnormal Events	Placebo	number of events	ENDPT3 vs Baseline	Clinical Scale (Lower is better)	3	['PH002', 'PH004', 'PH005']	29	26.333	-2.667	-9.2	-12.333	-1.6923	0.082919	-1.382	-3.905	1.141	Treatment delta < Placebo delta (Lower is better: One-tailed test)	FALSE	TRUE	FALSE	Non-significant treatment advantage
CGI	Treatment	CGI-GI - severity	ENDPT1 vs Baseline	Clinical Scale (Lower is better)	3	['PH003', 'PH006', 'PH009']	6.667	5.667	-1	-15	-0.333	-0.378	0.362329	-0.309	-2.589	1.972	Treatment delta < Placebo delta (Lower is better: One-tailed test)	FALSE	TRUE	FALSE	Non-significant treatment advantage
CGI	Placebo	CGI-GI - severity	ENDPT1 vs Baseline	Clinical Scale (Lower is better)	3	['PH002', 'PH004', 'PH005']	6	5.333	-0.667	-11.1	-0.333	-0.378	0.362329	-0.309	-2.589	1.972	Treatment delta < Placebo delta (Lower is better: One-tailed test)	FALSE	TRUE	FALSE	Non-significant treatment advantage
CGI	Treatment	CGI-GI - severity	ENDPT2 vs Baseline	Clinical Scale (Lower is better)	3	['PH003', 'PH006', 'PH009']	6.667	5	-1.667	-25	0.333	0.2774	0.602372	0.226	-2.048	2.501	Treatment delta < Placebo delta (Lower is better: One-tailed test)	FALSE	FALSE	FALSE	Non-significant placebo advantage
CGI	Placebo	CGI-GI - severity	ENDPT2 vs Baseline	Clinical Scale (Lower is better)	3	['PH002', 'PH004', 'PH005']	6	4	-2	-33.3	0.333	0.2774	0.602372	0.226	-2.048	2.501	Treatment delta < Placebo delta (Lower is better: One-tailed test)	FALSE	FALSE	FALSE	Non-significant placebo advantage
CGI	Treatment	CGI-PTHS - severity	ENDPT1 vs Baseline	Clinical Scale (Lower is better)	3	['PH003', 'PH006', 'PH009']	6.333	6.333	0	0	0.333	1	0.81305	0.816	-1.543	3.176	Treatment delta < Placebo delta (Lower is better: One-tailed test)	FALSE	FALSE	FALSE	Non-significant placebo advantage
CGI	Placebo	CGI-PTHS - severity	ENDPT1 vs Baseline	Clinical Scale (Lower is better)	3	['PH002', 'PH004', 'PH005']	5.667	5.333	-0.333	-5.9	0.333	1	0.81305	0.816	-1.543	3.176	Treatment delta < Placebo delta (Lower is better: One-tailed test)	FALSE	FALSE	FALSE	Non-significant placebo advantage
CGI	Treatment	CGI-PTHS - severity	ENDPT2 vs Baseline	Clinical Scale (Lower is better)	3	['PH003', 'PH006', 'PH009']	6.333	5.333	-1	-15.8	0	0	0.5	0	-2.267	2.267	Treatment delta < Placebo delta (Lower is better: One-tailed test)	FALSE	FALSE	FALSE	Non-significant no meaningful difference
CGI	Placebo	CGI-PTHS - severity	ENDPT2 vs Baseline	Clinical Scale (Lower is better)	3	['PH002', 'PH004', 'PH005']	5.667	4.667	-1	-17.6	0	0	0.5	0	-2.267	2.267	Treatment delta < Placebo delta (Lower is better: One-tailed test)	FALSE	FALSE	FALSE	Non-significant no meaningful difference

## Sheet: Symptoms_avg_data
TimePoints	MTT_cat	PatientID	GSRS_constipation	GSRS_avg	abdominal_pain	PGI_PTHS	FLACC	CGI_GI_severity	CGI_PTHS_severity	DSR_AbnormalDays
Baseline	Treated	PHMTT-006	5	3.33	3.33	3.72414	6	7	6	14
Baseline	Treated	PHMTT-009	5.67	3.8	3	4.68966	6	6	6	12
Baseline	Treated	PHMTT-003	7	4.6	3.33	3.34483	5	7	7	14
EndPart1	Treated	PHMTT-006	2.67	1.87	1.67	0.0344828	5	7	6	12
EndPart1	Treated	PHMTT-009	1.67	1.47	1	0.206897	0	6	6	9
EndPart1	Treated	PHMTT-003	1	1.4	1	1.7931	0	5	5	14
EndPart2	Treated	PHMTT-006	1.67	1.53	1.67	0.137931	5	6	5	14
EndPart2	Treated	PHMTT-009	1.67	1.13	1	0.293103	0	5	6	8
EndPart2	Treated	PHMTT-003	1	1.466	1	2.10345	0	3	3	14
EndPart3	Treated	PHMTT-006	1.67	1.6	1.67	0.344828	5	na	na	14
EndPart3	Treated	PHMTT-009	1	1	1	1.18966	0	na	na	5
EndPart3	Treated	PHMTT-003	1	1.13	1	2.10345	0	na	na	14
Baseline	Placebo	PHMTT-002	6.33	5.33	4.33	3.65517	5	6	5	10
Baseline	Placebo	PHMTT-004	4.66	4.07	2.66	3.24138	6	6	7	14
Baseline	Placebo	PHMTT-005	3.33	3.8	4	3.17241	6	6	5	14
EndPart1	Placebo	PHMTT-002	3.33	2.06	1.66	0.793103	0	4	4	2
EndPart1	Placebo	PHMTT-004	4.66	4	2.66	0.0689655	4	6	7	14
EndPart1	Placebo	PHMTT-005	3.33	3.93	4.33	0	5	6	5	14
EndPart2	Placebo	PHMTT-002	2	1.33	1.33	0.517241	1	2	3	3
EndPart2	Placebo	PHMTT-004	3.66	2.23	1	0.517241	1	5	6	14
EndPart2	Placebo	PHMTT-005	3.66	2.2	1.66	0.103448	3	4	5	8
EndPart3	Placebo	PHMTT-002	2	1.27	1.33	0.730769	0	na	na	2
EndPart3	Placebo	PHMTT-004	2.17	2.03	1.17	1	1	na	na	14
EndPart3	Placebo	PHMTT-005	4.33	1.93	1.33	0.0689655	1	na	na	9
na=not available

## Sheet: Medical_History
No=0, Yes=1 Code	Delivery, vaginal=1 csection=2	number of months breast fed exclusively	age at which started partial breast feeding and partial formula	age at which started only formula	type of formula, standard=1, soy=2, other=3	Standard formula?	Notes	antibiotics 0-6	6-12	12-24	24-36	36-48	total 0-48	Note	asthma (0=none, 1=mild, 2=moderate, 3=severe)	eczema (0=none, 1=mild, 2=moderate, 3=severe)	food allergy (0=none, 1=mild, 2=moderate, 3=severe)	food allergy (0=none, 1=mild, 2=moderate, 3=severe)	food allergy (0=none, 1=mild, 2=moderate, 3=severe)	max food allergy	other allergy (0=none, 1=mild, 2=moderate, 3=severe)	other allergy (0=none, 1=mild, 2=moderate, 3=severe)	other allergy (0=none, 1=mild, 2=moderate, 3=severe)	maximum allergy	developmental history (0-regression, 1=plateau, 2=early onsent)	age of regression	age of plateau	Chronic GI problems since infancy (chronic Constipation and/or Diarrhea) No: 0 Yes: 1	Notes	Medications/Treatments for GI symptoms	Medications/Treatments not for GI symptoms	Medications/Treatments for GI symptoms not currently used
PH-002	2	1.5	0.5 months	9 months	1	y		0	0	0	0	0	0	Parent said they do not know, took 1 or 2 rounds in last 12 months (12/20/2019)	0	0	2	0	0	Dairy Intolerance	1	0	0	seasonal	2	2 years	2 years		it started at 7 months, not hitting milestones	Senna, Apple Cider Vinegar, Betaine HCl, Enzymes, Peppermint, Aloe Vera Water, Magnesium, Dairy Free,	Oxacarbazepine, Omega, Multivitamin, Zyrtec, Amantadine, Vitamin B12, Vitamin C, CBD oil, Doxepin, Coconut Water	Probiotics, Triphala, GABA, Guanfacine/ Intuniv, Vayarin
PH-003	Not reported	0	2 months	2 months	2	n		Not reported	Not reported	Not reported	Not reported	Not reported	Not reported	Parent left question marks,2 rounds in last 12 months (2019)	1	2	0	0	0	0	2	2	0	moderate for hives and eczema	2	6 months	5		low muscle tone and global developmental delay early onset-2	Lactulose 10g/15mL, Glycolax	Lamictal 25mg, Lamictal 100mg, Lamictal 200mg, Cetirizine 1mg/1mL, Oxcarbazepine 300mg/5m, Cyproheptadine 2mg, Diazepam 5-7.5-10mg rectal, Clonazepam 0.5mg, Montelukast 5mg, Hydroxyzine 10mg/5mL, Tacrolimus .03% ointment, Amantadine 50mg/5mL	Not reported
PH-004	1	0	22 months	6 months	3	n	started standard, then soy, then elemental	0	0	0	0	1	1	azithromycin 10 days	0	0	2	2	2	Dairy, Gluten, Corn- Moderate	2	0	0	moderate for hives at certain times	2	2 weeks	13 months	1	2 weeks old constipation, 7 months developmental delays	Senna, Mag 07 magnesium, Beta plus/Ox bile beet, Betaine, Probiotics, Enzymes, Spanish Black Radish, Candibactin	Gluten Free/ Dairy Free, Corn Free Diet, Amantadine, Amitriptyline, Zyrtec, Benadryl, Allegra, Melatonin	Miralax
PH-005	1	13	0	0	3	n	breast only	Not reported	Not reported	Not reported	Not reported	Not reported	Not reported	Does not know information, used antibiotics when born for ear infections	2	0	3	3	3	Eggs, soy, nuts	2	1	1	seasonal moderate, mold mild, dogs mild	2	6 months	6 months	1	after solid food- constipation and reflux	Miralax	Eflexor	Probiotics, Mg citrate
PH-006	1	2	9	not reported	3	n	Alimentum(similac)	0	0	1	1	1	3	1 round in last 12 months	0	1	0	0	0	0	1	0	0	seasonal, eczema mild	2	4 years	4 years	1	always had GI problems, severe constipation, gassy, and bloated	Mirilax, Exlax	Guanfacine, Omeprazole, Respridone, Trazadone	Not reported
PH-009	2	1.5	0	10.5 months	1	y		Not reported	Not reported	Not reported	Not reported	Not reported	Not reported		0	0	0	0	0	0	1	0	0	keppra	2	3 months	16 months	1	Constipation noted	Not Reported	Not Reported	Not reported

## Sheet: Figure2_Symptoms_results
Sheet	Group	Variable	Comparison	Hypothesis_Type	N	Participants	Baseline_Mean	Followup_Mean	Mean_Delta	Percent_Change	Delta_of_Delta	T_statistic	P_value_one_tailed	Cohens_d	Cohens_d_CI_Lower	Cohens_d_CI_Upper	Hypothesis	Significant	Treatment_Advantage	Significant_Advantage	Interpretation
PGI	Treatment	Average of all symptoms	ENDPT1 vs Baseline	PGI (Higher is better)	3	['PH003', 'PH006', 'PH009']	3.92	0.703	-3.216	17.9	0.114	0.5945	0.292079	0.485	-1.815	2.786	Treatment ratio > Placebo ratio (PGI: Higher is better)	FALSE	TRUE	FALSE	Non-significant treatment advantage
PGI	Placebo	Average of all symptoms	ENDPT1 vs Baseline	PGI (Higher is better)	3	['PH002', 'PH004', 'PH005']	3.356	0.324	-3.032	9.6	0.114	0.5945	0.292079	0.485	-1.815	2.786	Treatment ratio > Placebo ratio (PGI: Higher is better)	FALSE	TRUE	FALSE	Non-significant treatment advantage
PGI	Treatment	Average of all symptoms	ENDPT2 vs Baseline	PGI (Higher is better)	3	['PH003', 'PH006', 'PH009']	3.92	0.879	-3.041	22.4	0.12	0.5849	0.295005	0.478	-1.821	2.777	Treatment ratio > Placebo ratio (PGI: Higher is better)	FALSE	TRUE	FALSE	Non-significant treatment advantage
PGI	Placebo	Average of all symptoms	ENDPT2 vs Baseline	PGI (Higher is better)	3	['PH002', 'PH004', 'PH005']	3.356	0.45	-2.907	13.4	0.12	0.5849	0.295005	0.478	-1.821	2.777	Treatment ratio > Placebo ratio (PGI: Higher is better)	FALSE	TRUE	FALSE	Non-significant treatment advantage
PGI	Treatment	Average of all symptoms	ENDPT3 vs Baseline	PGI (Higher is better)	3	['PH003', 'PH006', 'PH009']	3.92	1.265	-2.654	32.3	0.134	0.6938	0.262984	0.567	-1.745	2.879	Treatment ratio > Placebo ratio (PGI: Higher is better)	FALSE	TRUE	FALSE	Non-significant treatment advantage
PGI	Placebo	Average of all symptoms	ENDPT3 vs Baseline	PGI (Higher is better)	3	['PH002', 'PH004', 'PH005']	3.356	0.691	-2.666	20.6	0.134	0.6938	0.262984	0.567	-1.745	2.879	Treatment ratio > Placebo ratio (PGI: Higher is better)	FALSE	TRUE	FALSE	Non-significant treatment advantage
GSRS	Treatment	GSRS Subscores- abdominal pain	ENDPT1 vs Baseline	GSRS (Lower is better)	3	['PH003', 'PH006', 'PH009']	3.22	1.223	-1.997	-89.9	-1.217	-1.2552	0.138864	-1.025	-3.436	1.386	Treatment delta < Placebo delta (Lower is better: One-tailed test)	FALSE	TRUE	FALSE	Non-significant treatment advantage
GSRS	Placebo	GSRS Subscores- abdominal pain	ENDPT1 vs Baseline	GSRS (Lower is better)	3	['PH002', 'PH004', 'PH005']	3.663	2.883	-0.78	-29.3	-1.217	-1.2552	0.138864	-1.025	-3.436	1.386	Treatment delta < Placebo delta (Lower is better: One-tailed test)	FALSE	TRUE	FALSE	Non-significant treatment advantage
GSRS	Treatment	GSRS Subscores- abdominal pain	ENDPT2 vs Baseline	GSRS (Lower is better)	3	['PH003', 'PH006', 'PH009']	3.22	1.223	-1.997	-89.9	0.337	0.7784	0.760101	0.636	-1.688	2.959	Treatment delta < Placebo delta (Lower is better: One-tailed test)	FALSE	FALSE	FALSE	Non-significant placebo advantage
GSRS	Placebo	GSRS Subscores- abdominal pain	ENDPT2 vs Baseline	GSRS (Lower is better)	3	['PH002', 'PH004', 'PH005']	3.663	1.33	-2.333	-87.6	0.337	0.7784	0.760101	0.636	-1.688	2.959	Treatment delta < Placebo delta (Lower is better: One-tailed test)	FALSE	FALSE	FALSE	Non-significant placebo advantage
GSRS	Treatment	GSRS Subscores- abdominal pain	ENDPT3 vs Baseline	GSRS (Lower is better)	3	['PH003', 'PH006', 'PH009']	3.22	1.223	-1.997	-89.9	0.39	0.7839	0.761554	0.64	-1.684	2.964	Treatment delta < Placebo delta (Lower is better: One-tailed test)	FALSE	FALSE	FALSE	Non-significant placebo advantage
GSRS	Placebo	GSRS Subscores- abdominal pain	ENDPT3 vs Baseline	GSRS (Lower is better)	3	['PH002', 'PH004', 'PH005']	3.663	1.277	-2.387	-89.6	0.39	0.7839	0.761554	0.64	-1.684	2.964	Treatment delta < Placebo delta (Lower is better: One-tailed test)	FALSE	FALSE	FALSE	Non-significant placebo advantage
GSRS	Treatment	GSRS Subscores- average of all questions	ENDPT1 vs Baseline	GSRS (Lower is better)	3	['PH003', 'PH006', 'PH009']	3.91	1.58	-2.33	-80.1	-1.26	-1.0408	0.178375	-0.85	-3.217	1.517	Treatment delta < Placebo delta (Lower is better: One-tailed test)	FALSE	TRUE	FALSE	Non-significant treatment advantage
GSRS	Placebo	GSRS Subscores- average of all questions	ENDPT1 vs Baseline	GSRS (Lower is better)	3	['PH002', 'PH004', 'PH005']	4.4	3.33	-1.07	-31.5	-1.26	-1.0408	0.178375	-0.85	-3.217	1.517	Treatment delta < Placebo delta (Lower is better: One-tailed test)	FALSE	TRUE	FALSE	Non-significant treatment advantage
GSRS	Treatment	GSRS Subscores- average of all questions	ENDPT2 vs Baseline	GSRS (Lower is better)	3	['PH003', 'PH006', 'PH009']	3.91	1.375	-2.535	-87.1	-0.055	-0.0638	0.476113	-0.052	-2.319	2.215	Treatment delta < Placebo delta (Lower is better: One-tailed test)	FALSE	TRUE	FALSE	Non-significant treatment advantage
GSRS	Placebo	GSRS Subscores- average of all questions	ENDPT2 vs Baseline	GSRS (Lower is better)	3	['PH002', 'PH004', 'PH005']	4.4	1.92	-2.48	-72.9	-0.055	-0.0638	0.476113	-0.052	-2.319	2.215	Treatment delta < Placebo delta (Lower is better: One-tailed test)	FALSE	TRUE	FALSE	Non-significant treatment advantage
GSRS	Treatment	GSRS Subscores- average of all questions	ENDPT3 vs Baseline	GSRS (Lower is better)	3	['PH003', 'PH006', 'PH009']	3.91	1.243	-2.667	-91.6	-0.01	-0.0115	0.495674	-0.009	-2.276	2.258	Treatment delta < Placebo delta (Lower is better: One-tailed test)	FALSE	TRUE	FALSE	Non-significant treatment advantage
GSRS	Placebo	GSRS Subscores- average of all questions	ENDPT3 vs Baseline	GSRS (Lower is better)	3	['PH002', 'PH004', 'PH005']	4.4	1.743	-2.657	-78.1	-0.01	-0.0115	0.495674	-0.009	-2.276	2.258	Treatment delta < Placebo delta (Lower is better: One-tailed test)	FALSE	TRUE	FALSE	Non-significant treatment advantage
GSRS	Treatment	GSRS Subscores- constipation	ENDPT1 vs Baseline	GSRS (Lower is better)	3	['PH003', 'PH006', 'PH009']	5.89	1.78	-4.11	-84	-3.11	-2.1332	0.049923	-1.742	-4.404	0.921	Treatment delta < Placebo delta (Lower is better: One-tailed test)	TRUE	TRUE	TRUE	Significant treatment advantage
GSRS	Placebo	GSRS Subscores- constipation	ENDPT1 vs Baseline	GSRS (Lower is better)	3	['PH002', 'PH004', 'PH005']	4.773	3.773	-1	-26.5	-3.11	-2.1332	0.049923	-1.742	-4.404	0.921	Treatment delta < Placebo delta (Lower is better: One-tailed test)	TRUE	TRUE	TRUE	Significant treatment advantage
GSRS	Treatment	GSRS Subscores- constipation	ENDPT2 vs Baseline	GSRS (Lower is better)	3	['PH003', 'PH006', 'PH009']	5.89	1.447	-4.443	-90.9	-2.777	-1.7341	0.078964	-1.416	-3.951	1.119	Treatment delta < Placebo delta (Lower is better: One-tailed test)	FALSE	TRUE	FALSE	Non-significant treatment advantage
GSRS	Placebo	GSRS Subscores- constipation	ENDPT2 vs Baseline	GSRS (Lower is better)	3	['PH002', 'PH004', 'PH005']	4.773	3.107	-1.667	-44.2	-2.777	-1.7341	0.078964	-1.416	-3.951	1.119	Treatment delta < Placebo delta (Lower is better: One-tailed test)	FALSE	TRUE	FALSE	Non-significant treatment advantage
GSRS	Treatment	GSRS Subscores- constipation	ENDPT3 vs Baseline	GSRS (Lower is better)	3	['PH003', 'PH006', 'PH009']	5.89	1.223	-4.667	-95.4	-2.727	-1.5646	0.096364	-1.277	-3.765	1.21	Treatment delta < Placebo delta (Lower is better: One-tailed test)	FALSE	TRUE	FALSE	Non-significant treatment advantage
GSRS	Placebo	GSRS Subscores- constipation	ENDPT3 vs Baseline	GSRS (Lower is better)	3	['PH002', 'PH004', 'PH005']	4.773	2.833	-1.94	-51.4	-2.727	-1.5646	0.096364	-1.277	-3.765	1.21	Treatment delta < Placebo delta (Lower is better: One-tailed test)	FALSE	TRUE	FALSE	Non-significant treatment advantage
FLACC	Treatment	Total Score	ENDPT1 vs Baseline	Clinical Scale (Lower is better)	3	['PH003', 'PH006', 'PH009']	5.667	1.667	-4	-70.6	-1.333	-0.686	0.265206	-0.56	-2.871	1.751	Treatment delta < Placebo delta (Lower is better: One-tailed test)	FALSE	TRUE	FALSE	Non-significant treatment advantage
FLACC	Placebo	Total Score	ENDPT1 vs Baseline	Clinical Scale (Lower is better)	3	['PH002', 'PH004', 'PH005']	5.667	3	-2.667	-47.1	-1.333	-0.686	0.265206	-0.56	-2.871	1.751	Treatment delta < Placebo delta (Lower is better: One-tailed test)	FALSE	TRUE	FALSE	Non-significant treatment advantage
FLACC	Treatment	Total Score	ENDPT2 vs Baseline	Clinical Scale (Lower is better)	3	['PH003', 'PH006', 'PH009']	5.667	1.667	-4	-70.6	0	0	0.5	0	-2.267	2.267	Treatment delta < Placebo delta (Lower is better: One-tailed test)	FALSE	FALSE	FALSE	Non-significant no meaningful difference
FLACC	Placebo	Total Score	ENDPT2 vs Baseline	Clinical Scale (Lower is better)	3	['PH002', 'PH004', 'PH005']	5.667	1.667	-4	-70.6	0	0	0.5	0	-2.267	2.267	Treatment delta < Placebo delta (Lower is better: One-tailed test)	FALSE	FALSE	FALSE	Non-significant no meaningful difference
FLACC	Treatment	Total Score	ENDPT3 vs Baseline	Clinical Scale (Lower is better)	3	['PH003', 'PH006', 'PH009']	5.667	1.667	-4	-70.6	1	0.6547	0.725788	0.535	-1.773	2.842	Treatment delta < Placebo delta (Lower is better: One-tailed test)	FALSE	FALSE	FALSE	Non-significant placebo advantage
FLACC	Placebo	Total Score	ENDPT3 vs Baseline	Clinical Scale (Lower is better)	3	['PH002', 'PH004', 'PH005']	5.667	0.667	-5	-88.2	1	0.6547	0.725788	0.535	-1.773	2.842	Treatment delta < Placebo delta (Lower is better: One-tailed test)	FALSE	FALSE	FALSE	Non-significant placebo advantage
DSR	Treatment	# of days abnormal	ENDPT1 vs Baseline	Clinical Scale (Lower is better)	3	['PH003', 'PH006', 'PH009']	14	11.667	-2.333	-16.7	-2.333	-1.6059	0.091783	-1.311	-3.81	1.187	Treatment delta < Placebo delta (Lower is better: One-tailed test)	FALSE	TRUE	FALSE	Non-significant treatment advantage
DSR	Placebo	# of days abnormal	ENDPT1 vs Baseline	Clinical Scale (Lower is better)	3	['PH002', 'PH004', 'PH005']	14	14	0	0	-2.333	-1.6059	0.091783	-1.311	-3.81	1.187	Treatment delta < Placebo delta (Lower is better: One-tailed test)	FALSE	TRUE	FALSE	Non-significant treatment advantage
DSR	Treatment	# of days abnormal	ENDPT2 vs Baseline	Clinical Scale (Lower is better)	3	['PH003', 'PH006', 'PH009']	14	12	-2	-14.3	1	0.2774	0.602372	0.226	-2.048	2.501	Treatment delta < Placebo delta (Lower is better: One-tailed test)	FALSE	FALSE	FALSE	Non-significant placebo advantage
DSR	Placebo	# of days abnormal	ENDPT2 vs Baseline	Clinical Scale (Lower is better)	3	['PH002', 'PH004', 'PH005']	14	11	-3	-21.4	1	0.2774	0.602372	0.226	-2.048	2.501	Treatment delta < Placebo delta (Lower is better: One-tailed test)	FALSE	FALSE	FALSE	Non-significant placebo advantage
DSR	Treatment	# of days abnormal	ENDPT3 vs Baseline	Clinical Scale (Lower is better)	3	['PH003', 'PH006', 'PH009']	14	11	-3	-21.4	-3	-1	0.18695	-0.816	-3.176	1.543	Treatment delta < Placebo delta (Lower is better: One-tailed test)	FALSE	TRUE	FALSE	Non-significant treatment advantage
DSR	Placebo	# of days abnormal	ENDPT3 vs Baseline	Clinical Scale (Lower is better)	3	['PH002', 'PH004', 'PH005']	14	14	0	0	-3	-1	0.18695	-0.816	-3.176	1.543	Treatment delta < Placebo delta (Lower is better: One-tailed test)	FALSE	TRUE	FALSE	Non-significant treatment advantage
DSR Abnormal Events	Treatment	# of days abnormal	ENDPT1 vs Baseline	Clinical Scale (Lower is better)	3	['PH003', 'PH006', 'PH009']	14	11.667	-2.333	-16.7	-2.333	-1.6059	0.091783	-1.311	-3.81	1.187	Treatment delta < Placebo delta (Lower is better: One-tailed test)	FALSE	TRUE	FALSE	Non-significant treatment advantage
DSR Abnormal Events	Placebo	# of days abnormal	ENDPT1 vs Baseline	Clinical Scale (Lower is better)	3	['PH002', 'PH004', 'PH005']	14	14	0	0	-2.333	-1.6059	0.091783	-1.311	-3.81	1.187	Treatment delta < Placebo delta (Lower is better: One-tailed test)	FALSE	TRUE	FALSE	Non-significant treatment advantage
DSR Abnormal Events	Treatment	# of days abnormal	ENDPT2 vs Baseline	Clinical Scale (Lower is better)	3	['PH003', 'PH006', 'PH009']	14	12	-2	-14.3	0	0	0.5	0	-2.267	2.267	Treatment delta < Placebo delta (Lower is better: One-tailed test)	FALSE	FALSE	FALSE	Non-significant no meaningful difference
DSR Abnormal Events	Placebo	# of days abnormal	ENDPT2 vs Baseline	Clinical Scale (Lower is better)	3	['PH002', 'PH004', 'PH005']	14	12	-2	-14.3	0	0	0.5	0	-2.267	2.267	Treatment delta < Placebo delta (Lower is better: One-tailed test)	FALSE	FALSE	FALSE	Non-significant no meaningful difference
DSR Abnormal Events	Treatment	# of days abnormal	ENDPT3 vs Baseline	Clinical Scale (Lower is better)	3	['PH003', 'PH006', 'PH009']	14	11	-3	-21.4	-3	-1	0.18695	-0.816	-3.176	1.543	Treatment delta < Placebo delta (Lower is better: One-tailed test)	FALSE	TRUE	FALSE	Non-significant treatment advantage
DSR Abnormal Events	Placebo	# of days abnormal	ENDPT3 vs Baseline	Clinical Scale (Lower is better)	3	['PH002', 'PH004', 'PH005']	14	14	0	0	-3	-1	0.18695	-0.816	-3.176	1.543	Treatment delta < Placebo delta (Lower is better: One-tailed test)	FALSE	TRUE	FALSE	Non-significant treatment advantage
DSR Abnormal Events	Treatment	number of events	ENDPT1 vs Baseline	Clinical Scale (Lower is better)	3	['PH003', 'PH006', 'PH009']	29.667	18.333	-11.333	-38.2	-11	-1.542	0.098969	-1.259	-3.74	1.222	Treatment delta < Placebo delta (Lower is better: One-tailed test)	FALSE	TRUE	FALSE	Non-significant treatment advantage
DSR Abnormal Events	Placebo	number of events	ENDPT1 vs Baseline	Clinical Scale (Lower is better)	3	['PH002', 'PH004', 'PH005']	29	28.667	-0.333	-1.1	-11	-1.542	0.098969	-1.259	-3.74	1.222	Treatment delta < Placebo delta (Lower is better: One-tailed test)	FALSE	TRUE	FALSE	Non-significant treatment advantage
DSR Abnormal Events	Treatment	number of events	ENDPT2 vs Baseline	Clinical Scale (Lower is better)	3	['PH003', 'PH006', 'PH009']	29.667	18.333	-11.333	-38.2	0	0	0.5	0	-2.267	2.267	Treatment delta < Placebo delta (Lower is better: One-tailed test)	FALSE	FALSE	FALSE	Non-significant no meaningful difference
DSR Abnormal Events	Placebo	number of events	ENDPT2 vs Baseline	Clinical Scale (Lower is better)	3	['PH002', 'PH004', 'PH005']	29	17.667	-11.333	-39.1	0	0	0.5	0	-2.267	2.267	Treatment delta < Placebo delta (Lower is better: One-tailed test)	FALSE	FALSE	FALSE	Non-significant no meaningful difference
DSR Abnormal Events	Treatment	number of events	ENDPT3 vs Baseline	Clinical Scale (Lower is better)	3	['PH003', 'PH006', 'PH009']	29.667	14.667	-15	-50.6	-12.333	-1.6923	0.082919	-1.382	-3.905	1.141	Treatment delta < Placebo delta (Lower is better: One-tailed test)	FALSE	TRUE	FALSE	Non-significant treatment advantage
DSR Abnormal Events	Placebo	number of events	ENDPT3 vs Baseline	Clinical Scale (Lower is better)	3	['PH002', 'PH004', 'PH005']	29	26.333	-2.667	-9.2	-12.333	-1.6923	0.082919	-1.382	-3.905	1.141	Treatment delta < Placebo delta (Lower is better: One-tailed test)	FALSE	TRUE	FALSE	Non-significant treatment advantage
CGI	Treatment	CGI-GI - severity	ENDPT1 vs Baseline	Clinical Scale (Lower is better)	3	['PH003', 'PH006', 'PH009']	6.667	5.667	-1	-15	-0.333	-0.378	0.362329	-0.309	-2.589	1.972	Treatment delta < Placebo delta (Lower is better: One-tailed test)	FALSE	TRUE	FALSE	Non-significant treatment advantage
CGI	Placebo	CGI-GI - severity	ENDPT1 vs Baseline	Clinical Scale (Lower is better)	3	['PH002', 'PH004', 'PH005']	6	5.333	-0.667	-11.1	-0.333	-0.378	0.362329	-0.309	-2.589	1.972	Treatment delta < Placebo delta (Lower is better: One-tailed test)	FALSE	TRUE	FALSE	Non-significant treatment advantage
CGI	Treatment	CGI-GI - severity	ENDPT2 vs Baseline	Clinical Scale (Lower is better)	3	['PH003', 'PH006', 'PH009']	6.667	5	-1.667	-25	0.333	0.2774	0.602372	0.226	-2.048	2.501	Treatment delta < Placebo delta (Lower is better: One-tailed test)	FALSE	FALSE	FALSE	Non-significant placebo advantage
CGI	Placebo	CGI-GI - severity	ENDPT2 vs Baseline	Clinical Scale (Lower is better)	3	['PH002', 'PH004', 'PH005']	6	4	-2	-33.3	0.333	0.2774	0.602372	0.226	-2.048	2.501	Treatment delta < Placebo delta (Lower is better: One-tailed test)	FALSE	FALSE	FALSE	Non-significant placebo advantage
CGI	Treatment	CGI-PTHS - severity	ENDPT1 vs Baseline	Clinical Scale (Lower is better)	3	['PH003', 'PH006', 'PH009']	6.333	6.333	0	0	0.333	1	0.81305	0.816	-1.543	3.176	Treatment delta < Placebo delta (Lower is better: One-tailed test)	FALSE	FALSE	FALSE	Non-significant placebo advantage
CGI	Placebo	CGI-PTHS - severity	ENDPT1 vs Baseline	Clinical Scale (Lower is better)	3	['PH002', 'PH004', 'PH005']	5.667	5.333	-0.333	-5.9	0.333	1	0.81305	0.816	-1.543	3.176	Treatment delta < Placebo delta (Lower is better: One-tailed test)	FALSE	FALSE	FALSE	Non-significant placebo advantage
CGI	Treatment	CGI-PTHS - severity	ENDPT2 vs Baseline	Clinical Scale (Lower is better)	3	['PH003', 'PH006', 'PH009']	6.333	5.333	-1	-15.8	0	0	0.5	0	-2.267	2.267	Treatment delta < Placebo delta (Lower is better: One-tailed test)	FALSE	FALSE	FALSE	Non-significant no meaningful difference
CGI	Placebo	CGI-PTHS - severity	ENDPT2 vs Baseline	Clinical Scale (Lower is better)	3	['PH002', 'PH004', 'PH005']	5.667	4.667	-1	-17.6	0	0	0.5	0	-2.267	2.267	Treatment delta < Placebo delta (Lower is better: One-tailed test)	FALSE	FALSE	FALSE	Non-significant no meaningful difference
