# Supplementary material
Source: Research Square preprint supplement (doi:10.21203/rs.3.rs-9930475/v1)
Supplement: Supplementary file 2 [file e347447a1da5dfa42291824a.xlsx]

## Sheet: metadata
sample_name	order_number	Patient_ID	Stool ID	Category	Group_for_case_control	Group_fCriteria_BaselineVsTDor_case_control	ReCat	ReCategory	ReGroup	Criteria_Regroup	Description
A1	samp01	PH002	ST1	Placebo	Baseline	Include	pl_Baseline	pl_Baseline	pl_Baseline	Include	pl_Baseline
A10	samp02	PH004	ST5	Placebo	IniPart2	Exclude	pl_IniPart2	Vanco	Vanco	Include	pl_IniPart2
A11	samp03	PH001	ST1	DropOut	Baseline	Include	DropOut	DropOut	DropOut	Exclude	DropOut
A12	samp04	PH003	ST1	Treated	Baseline	Include	tr_Baseline	Baseline	Baseline	Include	tr_Baseline
A13	samp05	PH003	ST2	Treated	Vanco	Exclude	tr_Vanco	Vanco	Vanco	Include	tr_Vanco
A136	samp06	PH004	ST8	Placebo	EndPart3	Exclude	pl_EndPart3	FollUp	EndPart2	Include	pl_EndPart3
A137	samp07	PH009	ST6	Treated	EndPart3	Exclude	tr_EndPart3	tr_EndPart3	tr_EndPart3	Exclude	tr_EndPart3
A138	samp08	PH002	ST8	Placebo	EndPart3	Exclude	pl_EndPart3	FollUp	EndPart2	Include	pl_EndPart3
A139	samp09	PH005	ST7	Placebo	EndPart2	Exclude	pl_EndPart2	EndMT	EndPart1	Include	pl_EndPart2
A14	samp10	PH003	ST3	Treated	IniPart1	Exclude	tr_IniPart1	StartMT	IniPart1	Include	tr_IniPart1
A15	samp11	PH003	ST4	Treated	EndPart1	Exclude	tr_EndPart1	EndMT	EndPart1	Include	tr_EndPart1
A16	samp12	PH003	ST5	Treated	EndPart2	Exclude	tr_EndPart2	FollUp	EndPart2	Include	tr_EndPart2
A17	samp13	PH005	ST1	Placebo	Baseline	Include	pl_Baseline	pl_Baseline	pl_Baseline	Include	pl_Baseline
A18	samp14	PH005	ST2	Placebo	Vanco	Exclude	pl_Vanco	pl_Vanco	pl_Vanco	Include	pl_Vanco
A19	samp15	PH005	ST3	Placebo	IniPart1	Exclude	pl_IniPart1	pl_StartMT	pl_IniPart1	Include	pl_IniPart1
A195	samp16	PH002	ST6	Placebo	ConPart2	Exclude	pl_ConPart2	StartMT	IniPart1	Include	pl_ConPart2
A196	samp17	PH002	ST7	Placebo	EndPart2	Exclude	pl_EndPart2	EndMT	EndPart1	Include	pl_EndPart2
A197	samp18	PH004	ST6	Placebo	ConPart2	Exclude	pl_ConPart2	StartMT	IniPart1	Include	pl_ConPart2
A198	samp19	PH004	ST7	Placebo	EndPart2	Exclude	pl_EndPart2	EndMT	EndPart1	Include	pl_EndPart2
A199	samp20	PH005	ST6	Placebo	ConPart2	Exclude	pl_ConPart2	StartMT	IniPart1	Include	pl_ConPart2
A2	samp21	PH002	ST2	Placebo	Vanco	Exclude	pl_Vanco	pl_Vanco	pl_Vanco	Include	pl_Vanco
A20	samp22	PH005	ST4	Placebo	EndPart1	Exclude	pl_EndPart1	Baseline	Baseline	Include	pl_EndPart1
A200	samp23	PH005	ST8	Placebo	EndPart3	Exclude	pl_EndPart3	FollUp	EndPart2	Include	pl_EndPart3
A201	samp24	PH006	ST6	Treated	EndPart3	Exclude	tr_EndPart3	tr_EndPart3	tr_EndPart3	Exclude	tr_EndPart3
A21	samp25	PH005	ST5	Placebo	IniPart2	Exclude	pl_IniPart2	Vanco	Vanco	Include	pl_IniPart2
A22	samp26	PH006	ST1	Treated	Baseline	Include	tr_Baseline	Baseline	Baseline	Include	tr_Baseline
A220	samp27	UMN1	UMN	Donor	UMN	Exclude	UMN	Donor	Donor	Include	Donor
A23	samp28	PH006	ST2	Treated	Vanco	Exclude	tr_Vanco	Vanco	Vanco	Include	tr_Vanco
A24	samp29	PH006	ST3	Treated	IniPart1	Exclude	tr_IniPart1	StartMT	IniPart1	Include	tr_IniPart1
A243	samp30	PH003	ST6	Treated	EndPart3	Exclude	tr_EndPart3	tr_EndPart3	tr_EndPart3	Exclude	tr_EndPart3
A25	samp31	PH006	ST4	Treated	EndPart1	Exclude	tr_EndPart1	EndMT	EndPart1	Include	tr_EndPart1
A26	samp32	PH006	ST5	Treated	EndPart2	Exclude	tr_EndPart2	FollUp	EndPart2	Include	tr_EndPart2
A27	samp33	PH009	ST1	Treated	Baseline	Include	tr_Baseline	Baseline	Baseline	Include	tr_Baseline
A28	samp34	PH009	ST2	Treated	Vanco	Exclude	tr_Vanco	Vanco	Vanco	Include	tr_Vanco
A29	samp35	PH009	ST3	Treated	IniPart1	Exclude	tr_IniPart1	StartMT	IniPart1	Include	tr_IniPart1
A3	samp36	PH002	ST3	Placebo	IniPart1	Exclude	pl_IniPart1	pl_StartMT	pl_IniPart1	Include	pl_IniPart1
A30	samp37	PH009	ST4	Treated	EndPart1	Exclude	tr_EndPart1	EndMT	EndPart1	Include	tr_EndPart1
A31	samp38	PH009	ST5	Treated	EndPart2	Exclude	tr_EndPart2	FollUp	EndPart2	Include	tr_EndPart2
A4	samp39	PH002	ST4	Placebo	EndPart1	Exclude	pl_EndPart1	Baseline	Baseline	Include	pl_EndPart1
A5	samp40	PH002	ST5	Placebo	IniPart2	Exclude	pl_IniPart2	Vanco	Vanco	Include	pl_IniPart2
A6	samp41	PH004	ST1	Placebo	Baseline	Include	pl_Baseline	pl_Baseline	pl_Baseline	Include	pl_Baseline
A7	samp42	PH004	ST2	Placebo	Vanco	Exclude	pl_Vanco	pl_Vanco	pl_Vanco	Include	pl_Vanco
A8	samp43	PH004	ST3	Placebo	IniPart1	Exclude	pl_IniPart1	pl_StartMT	pl_IniPart1	Include	pl_IniPart1
A9	samp44	PH004	ST4	Placebo	EndPart1	Exclude	pl_EndPart1	Baseline	Baseline	Include	pl_EndPart1
F146	samp45	UMN2	UMN	Donor	UMN	Exclude	UMN	Donor	Donor	Include	Donor
VTD01	samp46	VTD01	VTD01	VitaminMineralTDchildren	TD	Include	TD	TD	TD	Include	TD
VTD02	samp47	VTD02	VTD02	VitaminMineralTDchildren	TD	Include	TD	TD	TD	Include	TD
VTD03	samp48	VTD03	VTD03	VitaminMineralTDchildren	TD	Include	TD	TD	TD	Include	TD
VTD04	samp49	VTD04	VTD04	VitaminMineralTDchildren	TD	Include	TD	TD	TD	Include	TD
VTD05	samp50	VTD05	VTD05	VitaminMineralTDchildren	TD	Include	TD	TD	TD	Include	TD
VTD06	samp51	VTD06	VTD06	VitaminMineralTDchildren	TD	Include	TD	TD	TD	Include	TD
VTD07	samp52	VTD07	VTD07	VitaminMineralTDchildren	TD	Include	TD	TD	TD	Include	TD
VTD08	samp53	VTD08	VTD08	VitaminMineralTDchildren	TD	Include	TD	TD	TD	Include	TD
VTD09	samp54	VTD09	VTD09	VitaminMineralTDchildren	TD	Include	TD	TD	TD	Include	TD
VTD10	samp55	VTD10	VTD10	VitaminMineralTDchildren	TD	Include	TD	TD	TD	Include	TD
VTD11	samp56	VTD11	VTD11	VitaminMineralTDchildren	TD	Include	TD	TD	TD	Include	TD
VTD12	samp57	VTD12	VTD12	VitaminMineralTDchildren	TD	Include	TD	TD	TD	Include	TD
VTD13	samp58	VTD13	VTD13	VitaminMineralTDchildren	TD	Include	TD	TD	TD	Include	TD
VTD14	samp59	VTD14	VTD14	VitaminMineralTDchildren	TD	Include	TD	TD	TD	Include	TD
VTD15	samp60	VTD15	VTD15	VitaminMineralTDchildren	TD	Include	TD	TD	TD	Include	TD
VTD16	samp61	VTD16	VTD16	VitaminMineralTDchildren	TD	Include	TD	TD	TD	Include	TD
VTD17	samp62	VTD17	VTD17	VitaminMineralTDchildren	TD	Include	TD	TD	TD	Include	TD

## Sheet: taxa_BaselineVsTD_shotgun
Feature	Mann-Whitney U	p-value	RankBiserial_r	Rank_Biserial_r_Absolute_value	EnrichedCohort
Parabacteroides_u_s	119	5.77861e-06	1	1	Baseline
Dorea longicatena	4	0.000476108	-0.932773	0.932773	TD
Adlercreutzia equolifaciens	6.5	0.000850653	-0.890756	0.890756	TD
Ruminococcus_u_s	11	0.00104593	-0.815126	0.815126	TD
Enterocloster bolteae	108	0.00134742	0.815126	0.815126	Baseline
Haemophilus parainfluenzae	24	0.00166871	-0.596639	0.596639	TD
Lawsonibacter asaccharolyticus	108	0.00219969	0.815126	0.815126	Baseline
[Clostridium] symbiosum	105.5	0.00316406	0.773109	0.773109	Baseline
Clostridium phoceensis	105.5	0.00322613	0.773109	0.773109	Baseline
Bacteroides uniformis	106	0.00340596	0.781513	0.781513	Baseline
Parabacteroides distasonis	105	0.00417217	0.764706	0.764706	Baseline
Bilophila wadsworthia	103	0.00532568	0.731092	0.731092	Baseline
Enterocloster clostridioformis	102.5	0.00544389	0.722689	0.722689	Baseline
Desulfovibrio legallii	34	0.00574254	-0.428571	0.428571	TD
Blautia wexlerae	18	0.00679565	-0.697479	0.697479	TD
Faecalimonas umbilicata	87	0.00827797	0.462185	0.462185	Baseline
Actinomyces bouchesdurhonensis	99	0.00858639	0.663866	0.663866	Baseline
Parabacteroides massiliensis	30	0.00937832	-0.495798	0.495798	TD
[Clostridium] scindens	98	0.0111541	0.647059	0.647059	Baseline
Oscillospiraceae_u_s	99	0.0119819	0.663866	0.663866	Baseline
Blautia massiliensis	21	0.013077	-0.647059	0.647059	TD
Subdoligranulum_u_s	21	0.013077	-0.647059	0.647059	TD
Alistipes finegoldii	99	0.0131325	0.663866	0.663866	Baseline
Lachnoclostridium edouardi	97.5	0.0132635	0.638655	0.638655	Baseline
Bacteria_u_s	21	0.0157132	-0.647059	0.647059	TD
Dorea_u_s	21	0.0157814	-0.647059	0.647059	TD
Blautia_u_s	22	0.0160241	-0.630252	0.630252	TD
Bacteroides_u_s	97.5	0.0172109	0.638655	0.638655	Baseline
Phocaeicola vulgatus	97.5	0.0172109	0.638655	0.638655	Baseline
Odoribacter splanchnicus	97	0.0186242	0.630252	0.630252	Baseline
Peptostreptococcus stomatis	92	0.019285	0.546218	0.546218	Baseline
Alterileibacterium massiliense	94	0.0202614	0.579832	0.579832	Baseline
Bacteroides fragilis	96	0.0220576	0.613445	0.613445	Baseline
Dorea formicigenerans	23	0.0221156	-0.613445	0.613445	TD
Dysosmobacter welbionis	96	0.0221156	0.613445	0.613445	Baseline
Coprococcus catus	23	0.0221446	-0.613445	0.613445	TD
Roseburia intestinalis	24	0.0260939	-0.596639	0.596639	TD
Mediterraneibacter faecis	24	0.0260939	-0.596639	0.596639	TD
Clostridium cuniculi	89	0.0281451	0.495798	0.495798	Baseline
Anaerobutyricum hallii	25	0.0282632	-0.579832	0.579832	TD
Phocaeicola dorei	94	0.0286628	0.579832	0.579832	Baseline
Rothia mucilaginosa	42.5	0.0287318	-0.285714	0.285714	TD
Bacteroides nordii	76.5	0.028883	0.285714	0.285714	Baseline
Candidatus Stoquefichus massiliensis	42.5	0.028883	-0.285714	0.285714	TD
Eubacterium maltosivorans	42.5	0.028883	-0.285714	0.285714	TD
Ruminococcus gauvreauii	42.5	0.028883	-0.285714	0.285714	TD
Veillonella infantium	42.5	0.028883	-0.285714	0.285714	TD
Bacteroides thetaiotaomicron	93	0.0294145	0.563025	0.563025	Baseline
Granulicatella_u_s	91	0.0301664	0.529412	0.529412	Baseline
Gemella morbillorum	93	0.0306792	0.563025	0.563025	Baseline
Bacteroides intestinalis	30.5	0.0309738	-0.487395	0.487395	TD
Eubacterium limosum	35	0.0318479	-0.411765	0.411765	TD
Bacteroides faecis	89	0.0342129	0.495798	0.495798	Baseline
Lawsonella clevelandensis	81.5	0.0354978	0.369748	0.369748	Baseline
Clostridioides difficile	93	0.0360547	0.563025	0.563025	Baseline
Blautia luti	27.5	0.0375376	-0.537815	0.537815	TD
Bifidobacterium bifidum	29	0.0378267	-0.512605	0.512605	TD
Streptococcus mitis	86	0.0394743	0.445378	0.445378	Baseline
Fournierella massiliensis	91	0.0395426	0.529412	0.529412	Baseline
Butyricicoccus pullicaecorum	38	0.0395918	-0.361345	0.361345	TD
Bacteroides clarus	38	0.0400013	-0.361345	0.361345	TD
Roseburia faecis	27	0.0416725	-0.546218	0.546218	TD
Flavonifractor plautii	92	0.0417171	0.546218	0.546218	Baseline
Coprococcus comes	27	0.0418509	-0.546218	0.546218	TD
Anaerofustis stercorihominis	90.5	0.0443247	0.521008	0.521008	Baseline
Coprobacillus cateniformis	91	0.0462829	0.529412	0.529412	Baseline
Alistipes_u_s	91	0.0471708	0.529412	0.529412	Baseline
Clostridia_u_s	91	0.0471708	0.529412	0.529412	Baseline
Coprobacillus_u_s	28	0.0471708	-0.529412	0.529412	TD
Hungatella hathewayi	91	0.0481869	0.529412	0.529412	Baseline
Oscillibacter_u_s	91	0.0487757	0.529412	0.529412	Baseline
TM7 phylum sp. oral taxon 352	87.5	0.0613972	0.470588	0.470588	Baseline
Clostridiales_u_s	89	0.0645471	0.495798	0.495798	Baseline
Gordonibacter pamelaeae	30	0.0645471	-0.495798	0.495798	TD
Ruthenibacterium lactatiformans	89	0.0645471	0.495798	0.495798	Baseline
Anaerotruncus colihominis	88.5	0.0701041	0.487395	0.487395	Baseline
Adlercreutzia muris	85	0.0731633	0.428571	0.428571	Baseline
Clostridium celatum	80	0.0735558	0.344538	0.344538	Baseline
Bacteroides ovatus	88	0.0752276	0.478992	0.478992	Baseline
Barnesiella intestinihominis	32	0.0780419	-0.462185	0.462185	TD
Clostridiaceae_u_s	87.5	0.0803208	0.470588	0.470588	Baseline
Roseburia_u_s	31.5	0.0806503	-0.470588	0.470588	TD
Lancefieldella rimae	80.5	0.085685	0.352941	0.352941	Baseline
Bacteroides acidifaciens	40	0.0891501	-0.327731	0.327731	TD
Eubacterium ramulus	32.5	0.0922268	-0.453782	0.453782	TD
Eubacterium ventriosum	33	0.0944254	-0.445378	0.445378	TD
[Clostridium] spiroforme	33	0.0945724	-0.445378	0.445378	TD
Rubneribacter badeniensis	82.5	0.0948167	0.386555	0.386555	Baseline
Rothia_u_s	84.5	0.0948582	0.420168	0.420168	Baseline
Anaerococcus obesiensis	77	0.0957162	0.294118	0.294118	Baseline
Anaerococcus_u_s	77	0.096403	0.294118	0.294118	Baseline
Streptococcus massiliensis	77	0.096403	0.294118	0.294118	Baseline
Schaalia odontolytica	33	0.0972888	-0.445378	0.445378	TD
Collinsella_u_s	33	0.0986083	-0.445378	0.445378	TD
Atopobium_u_s	83.5	0.0988648	0.403361	0.403361	Baseline
Faecalibacterium prausnitzii	33	0.0994903	-0.445378	0.445378	TD
Enterocloster aldensis	85	0.102046	0.428571	0.428571	Baseline
Dielma fastidiosa	84.5	0.104256	0.420168	0.420168	Baseline
Bariatricus massiliensis	76.5	0.106604	0.285714	0.285714	Baseline
Adlercreutzia mucosicola	82	0.10666	0.378151	0.378151	Baseline
Anaerotruncus_u_s	83.5	0.109836	0.403361	0.403361	Baseline
Bacteroides cellulosilyticus	81	0.111909	0.361345	0.361345	Baseline
Blautia producta	84	0.113213	0.411765	0.411765	Baseline
Faecalibacterium_u_s	34	0.113856	-0.428571	0.428571	TD
Actinobaculum_u_s	34.5	0.117126	-0.420168	0.420168	TD
Holdemania filiformis	84.5	0.117933	0.420168	0.420168	Baseline
Alistipes onderdonkii	84.5	0.118014	0.420168	0.420168	Baseline
Achromobacter insuavis	80.5	0.120246	0.352941	0.352941	Baseline
Olsenella uli	45	0.121668	-0.243697	0.243697	TD
Veillonella parvula	74	0.121668	0.243697	0.243697	Baseline
Allisonella histaminiformans	74	0.121913	0.243697	0.243697	Baseline
Megamonas funiformis	74	0.121913	0.243697	0.243697	Baseline
Tyzzerella nexilis	84	0.124375	0.411765	0.411765	Baseline
Bacteroides caccae	84	0.125704	0.411765	0.411765	Baseline
Desulfotomaculum_u_s	83.5	0.126912	0.403361	0.403361	Baseline
Dellaglioa algida	77	0.12761	0.294118	0.294118	Baseline
Romboutsia hominis	77	0.128269	0.294118	0.294118	Baseline
Ruminococcus bromii	35.5	0.128379	-0.403361	0.403361	TD
Eggerthella lenta	84	0.129701	0.411765	0.411765	Baseline
Gemmiger formicilis	35	0.129701	-0.411765	0.411765	TD
Ruminococcus champanellensis	38.5	0.133189	-0.352941	0.352941	TD
Enteroscipio rubneri	83	0.134487	0.394958	0.394958	Baseline
Lactobacillus rogosae	38	0.13539	-0.361345	0.361345	TD
Bilophila_u_s	81.5	0.136159	0.369748	0.369748	Baseline
Faecalitalea cylindroides	82.5	0.137749	0.386555	0.386555	Baseline
Catabacter hongkongensis	83	0.139177	0.394958	0.394958	Baseline
Abiotrophia_u_s	80	0.14141	0.344538	0.344538	Baseline
Bacteroides caecimuris	51	0.142453	-0.142857	0.142857	TD
Blautia schinkii	68	0.142453	0.142857	0.142857	Baseline
Citrobacter freundii complex	51	0.142453	-0.142857	0.142857	TD
Clostridium baratii	68	0.142453	0.142857	0.142857	Baseline
Leuconostoc gelidum	51	0.142453	-0.142857	0.142857	TD
Parasutterella_u_s	51	0.142453	-0.142857	0.142857	TD
Phascolarctobacterium succinatutens	68	0.142453	0.142857	0.142857	Baseline
Alloprevotella tannerae	51	0.142453	-0.142857	0.142857	TD
Rothia dentocariosa	51	0.142453	-0.142857	0.142857	TD
Shigella flexneri	51	0.142453	-0.142857	0.142857	TD
Streptococcus cristatus	51	0.142453	-0.142857	0.142857	TD
Streptococcus oralis	51	0.142453	-0.142857	0.142857	TD
Veillonella atypica	51	0.142453	-0.142857	0.142857	TD
Roseburia inulinivorans	36	0.143998	-0.394958	0.394958	TD
Lactiplantibacillus plantarum	71	0.145194	0.193277	0.193277	Baseline
Parolsenella catena	71	0.145194	0.193277	0.193277	Baseline
Burkholderiales_u_s	80.5	0.1456	0.352941	0.352941	Baseline
[Clostridium] hylemonae	77	0.155504	0.294118	0.294118	Baseline
Veillonella_u_s	77.5	0.165029	0.302521	0.302521	Baseline
Eggerthella_u_s	82	0.16617	0.378151	0.378151	Baseline
Holdemania_u_s	79.5	0.167197	0.336134	0.336134	Baseline
Streptococcus viridans	81	0.169723	0.361345	0.361345	Baseline
Lachnoclostridium_u_s	81	0.172467	0.361345	0.361345	Baseline
Clostridium porci	39	0.176891	-0.344538	0.344538	TD
Finegoldia magna	47	0.184609	-0.210084	0.210084	TD
Alistipes timonensis	47	0.184898	-0.210084	0.210084	TD
Lactobacillus acidophilus	72	0.184898	0.210084	0.210084	Baseline
Gemella haemolysans	73.5	0.185839	0.235294	0.235294	Baseline
Streptococcus xiaochunlingii	79	0.185902	0.327731	0.327731	Baseline
Catenibacterium mitsuokai	78	0.188095	0.310924	0.310924	Baseline
Parasutterella excrementihominis	78	0.188222	0.310924	0.310924	Baseline
Mogibacterium diversum	38.5	0.189034	-0.352941	0.352941	TD
Christensenella timonensis	43.5	0.195645	-0.268908	0.268908	TD
Anaerostipes_u_s	77	0.197722	0.294118	0.294118	Baseline
Enterocloster citroniae	78.5	0.199153	0.319328	0.319328	Baseline
Urmitella timonensis	79	0.204253	0.327731	0.327731	Baseline
Catenibacterium_u_s	79.5	0.210314	0.336134	0.336134	Baseline
Dialister invisus	40	0.2104	-0.327731	0.327731	TD
Blautia coccoides	74	0.210564	0.243697	0.243697	Baseline
Butyricimonas virosa	74	0.210564	0.243697	0.243697	Baseline
Emergencia timonensis	74	0.210564	0.243697	0.243697	Baseline
Bacteroides xylanisolvens	78	0.212633	0.310924	0.310924	Baseline
Parabacteroides johnsonii	41.5	0.214006	-0.302521	0.302521	TD
Eisenbergiella tayi	79	0.223169	0.327731	0.327731	Baseline
Alistipes shahii	79	0.223476	0.327731	0.327731	Baseline
Haemophilus_u_s	44.5	0.225537	-0.252101	0.252101	TD
Phocaeicola coprocola	73.5	0.227116	0.235294	0.235294	Baseline
Romboutsia ilealis	77.5	0.232839	0.302521	0.302521	Baseline
Anaerostipes hadrus	40	0.233704	-0.327731	0.327731	TD
Granulicatella adiacens	75	0.234356	0.260504	0.260504	Baseline
Neobittarella massiliensis	78.5	0.236416	0.319328	0.319328	Baseline
Massilimaliae massiliensis	41	0.246594	-0.310924	0.310924	TD
Oliverpabstia intestinalis	41	0.247121	-0.310924	0.310924	TD
Anaerofilum_u_s	76.5	0.248424	0.285714	0.285714	Baseline
Collinsella aerofaciens	41	0.250888	-0.310924	0.310924	TD
Sutterella_u_s	75	0.255734	0.260504	0.260504	Baseline
Bifidobacterium breve	76	0.256554	0.277311	0.277311	Baseline
Phocaeicola massiliensis	43.5	0.257583	-0.268908	0.268908	TD
Senegalimassilia faecalis	73.5	0.258991	0.235294	0.235294	Baseline
Intestinimonas massiliensis	77	0.263896	0.294118	0.294118	Baseline
Roseburia hominis	41.5	0.265338	-0.302521	0.302521	TD
Sellimonas intestinalis	77.5	0.266068	0.302521	0.302521	Baseline
Ligilactobacillus animalis	70	0.267961	0.176471	0.176471	Baseline
Coprococcus eutactus	45	0.268322	-0.243697	0.243697	TD
Erysipelatoclostridium ramosum	74	0.268322	0.243697	0.243697	Baseline
Scardovia wiggsiae	70	0.268908	0.176471	0.176471	Baseline
Lachnotalea_u_s	77	0.270376	0.294118	0.294118	Baseline
Anaerotruncus massiliensis	75.5	0.271196	0.268908	0.268908	Baseline
Neglecta timonensis	77	0.273184	0.294118	0.294118	Baseline
Bittarella massiliensis	77	0.277128	0.294118	0.294118	Baseline
Streptococcus australis	76.5	0.279539	0.285714	0.285714	Baseline
Agathobaculum butyriciproducens	42	0.27976	-0.294118	0.294118	TD
Megamonas_u_s	71	0.282032	0.193277	0.193277	Baseline
Massilioclostridium coli	76.5	0.284064	0.285714	0.285714	Baseline
Streptococcus salivarius	42.5	0.289583	-0.285714	0.285714	TD
Parvimonas micra	75	0.294058	0.260504	0.260504	Baseline
Parvimonas_u_s	72.5	0.295946	0.218487	0.218487	Baseline
Peptoniphilus lacrimalis	75	0.296087	0.260504	0.260504	Baseline
[Clostridium] saccharogumia	43	0.29869	-0.277311	0.277311	TD
Lancefieldella parvula	73.5	0.303959	0.235294	0.235294	Baseline
Corynebacterium durum	76	0.307117	0.277311	0.277311	Baseline
Schaalia turicensis	72	0.314591	0.210084	0.210084	Baseline
Erysipelotrichaceae_u_s	76	0.317592	0.277311	0.277311	Baseline
Anaerotignum faecicola	45	0.320699	-0.243697	0.243697	TD
Hungatella effluvii	46	0.32222	-0.226891	0.226891	TD
Negativibacillus massiliensis	49	0.32809	-0.176471	0.176471	TD
Traorella massiliensis	74	0.331223	0.243697	0.243697	Baseline
Campylobacter_u_s	71.5	0.336274	0.201681	0.201681	Baseline
Lactococcus lactis	44	0.339815	-0.260504	0.260504	TD
Eubacterium_u_s	44	0.340657	-0.260504	0.260504	TD
Blautia obeum	44	0.349265	-0.260504	0.260504	TD
Alloscardovia_u_s	49.5	0.352356	-0.168067	0.168067	TD
Blautia hydrogenotrophica	74.5	0.353305	0.252101	0.252101	Baseline
Blautia faecicola	44.5	0.355737	-0.252101	0.252101	TD
Pseudopropionibacterium propionicum	74	0.361857	0.243697	0.243697	Baseline
[Eubacterium] brachy	72	0.363676	0.210084	0.210084	Baseline
Sutterella wadsworthensis	73	0.365552	0.226891	0.226891	Baseline
Pediococcus acidilactici	70	0.370956	0.176471	0.176471	Baseline
Enterococcus faecalis	68	0.37676	0.142857	0.142857	Baseline
Megamonas hypermegale	68	0.37676	0.142857	0.142857	Baseline
Streptococcus gordonii	68	0.37676	0.142857	0.142857	Baseline
Actinomyces israelii	48.5	0.379976	-0.184874	0.184874	TD
Butyricicoccus_u_s	45	0.382764	-0.243697	0.243697	TD
Gemmiger_u_s	48	0.382838	-0.193277	0.193277	TD
Streptococcus pneumoniae	66.5	0.389354	0.117647	0.117647	Baseline
Streptococcus symci	66.5	0.389354	0.117647	0.117647	Baseline
Angelakisella massiliensis	72.5	0.394104	0.218487	0.218487	Baseline
Streptococcus vestibularis	69.5	0.395149	0.168067	0.168067	Baseline
Anaerotignum lactatifermentans	72.5	0.395521	0.218487	0.218487	Baseline
Mediterraneibacter butyricigenes	46	0.396405	-0.226891	0.226891	TD
Actinomyces viscosus	73	0.402278	0.226891	0.226891	Baseline
Longicatena caecimuris	70	0.40308	0.176471	0.176471	Baseline
Abiotrophia defectiva	70.5	0.404678	0.184874	0.184874	Baseline
Enterorhabdus_u_s	70.5	0.404838	0.184874	0.184874	Baseline
Pseudoflavonifractor_u_s	46.5	0.415567	-0.218487	0.218487	TD
Lachnospiraceae_u_s	46	0.418071	-0.226891	0.226891	TD
Intestinimonas butyriciproducens	72.5	0.419369	0.218487	0.218487	Baseline
Adlercreutzia caecimuris	71.5	0.420411	0.201681	0.201681	Baseline
Actinomyces massiliensis	72.5	0.424429	0.218487	0.218487	Baseline
Enterococcus faecium	71.5	0.432681	0.201681	0.201681	Baseline
Turicibacter sanguinis	72	0.433731	0.210084	0.210084	Baseline
Eggerthella sinensis	70.5	0.435231	0.184874	0.184874	Baseline
Gemella sanguinis	47	0.442087	-0.210084	0.210084	TD
Porphyromonas_u_s	48.5	0.442472	-0.184874	0.184874	TD
Solobacterium moorei	71	0.44342	0.193277	0.193277	Baseline
Alistipes ihumii	71.5	0.448196	0.201681	0.201681	Baseline
Provencibacterium massiliense	49.5	0.452267	-0.168067	0.168067	TD
Streptococcus infantis	49	0.462169	-0.176471	0.176471	TD
Anaerotruncus rubiinfantis	51.5	0.463268	-0.134454	0.134454	TD
Marvinbryantia formatexigens	68.5	0.47204	0.151261	0.151261	Baseline
[Ruminococcus] lactaris	48	0.472909	-0.193277	0.193277	TD
Holdemanella biformis	68	0.474338	0.142857	0.142857	Baseline
Longibaculum_u_s	48	0.478901	-0.193277	0.193277	TD
Staphylococcus aureus	70.5	0.491368	0.184874	0.184874	Baseline
Clostridium fessum	48.5	0.504582	-0.184874	0.184874	TD
Megasphaera stantonii	65	0.507878	0.092437	0.092437	Baseline
Bacteroides finegoldii	49	0.512817	-0.176471	0.176471	TD
Drancourtella massiliensis	70	0.51571	0.176471	0.176471	Baseline
Chitinophaga silvisoli	50.5	0.51994	-0.151261	0.151261	TD
Bacteroides salyersiae	66.5	0.524771	0.117647	0.117647	Baseline
Clostridium perfringens	66.5	0.524985	0.117647	0.117647	Baseline
Massilimicrobiota timonensis	51	0.52648	-0.142857	0.142857	TD
Butyricimonas_u_s	52	0.530955	-0.12605	0.12605	TD
Slackia piriformis	67.5	0.531212	0.134454	0.134454	Baseline
Senegalimassilia anaerobia	52	0.531309	-0.12605	0.12605	TD
Firmicutes_u_s	49	0.534232	-0.176471	0.176471	TD
Streptococcus_u_s	49.5	0.546013	-0.168067	0.168067	TD
Absiella_u_s	54.5	0.550845	-0.0840336	0.0840336	TD
Schaalia meyeri	54.5	0.550845	-0.0840336	0.0840336	TD
Phocea massiliensis	68.5	0.551914	0.151261	0.151261	Baseline
Lachnoclostridium phocaeense	69	0.55503	0.159664	0.159664	Baseline
Longibaculum muris	67	0.558942	0.12605	0.12605	Baseline
Alistipes putredinis	69	0.567511	0.159664	0.159664	Baseline
Romboutsia timonensis	50	0.567511	-0.159664	0.159664	TD
Streptococcus sanguinis	68	0.568415	0.142857	0.142857	Baseline
Candidatus Saccharibacteria_u_s	67.5	0.569136	0.134454	0.134454	Baseline
Butyrivibrio crossotus	68.5	0.57292	0.151261	0.151261	Baseline
Terrisporobacter othiniensis	68.5	0.573555	0.151261	0.151261	Baseline
Lachnoclostridium pacaense	52	0.577367	-0.12605	0.12605	TD
Escherichia_u_s	56	0.582306	-0.0588235	0.0588235	TD
Latilactobacillus curvatus	63	0.582306	0.0588235	0.0588235	Baseline
Lactobacillus_u_s	63	0.582306	0.0588235	0.0588235	Baseline
Leuconostoc carnosum	63	0.582306	0.0588235	0.0588235	Baseline
Paraprevotella clara	63	0.582306	0.0588235	0.0588235	Baseline
Streptococcus pseudopneumoniae	63	0.582306	0.0588235	0.0588235	Baseline
Streptococcus timonensis	67.5	0.582306	0.134454	0.134454	Baseline
Streptococcus parasanguinis	68	0.586036	0.142857	0.142857	Baseline
Coprococcus_u_s	68.5	0.586527	0.151261	0.151261	Baseline
Bacteroides timonensis	53.5	0.590466	-0.10084	0.10084	TD
Eubacterium callanderi	66	0.591559	0.109244	0.109244	Baseline
Gordonibacter_u_s	51	0.595	-0.142857	0.142857	TD
Johnsonella ignava	67	0.596302	0.12605	0.12605	Baseline
Bacteroides stercorirosoris	55	0.596309	-0.0756303	0.0756303	TD
Enterococcus_u_s	64	0.596309	0.0756303	0.0756303	Baseline
Amedibacillus dolichus	64	0.596309	0.0756303	0.0756303	Baseline
Finegoldia_u_s	55	0.596309	-0.0756303	0.0756303	TD
Raoultibacter timonensis	64	0.596309	0.0756303	0.0756303	Baseline
Romboutsia_u_s	55	0.596309	-0.0756303	0.0756303	TD
Streptococcus koreensis	55	0.596309	-0.0756303	0.0756303	TD
Actinomyces gerencseriae	68	0.604229	0.142857	0.142857	Baseline
Alistipes senegalensis	67.5	0.608858	0.134454	0.134454	Baseline
Bifidobacterium_u_s	68	0.609835	0.142857	0.142857	Baseline
Methanobrevibacter smithii	53	0.616423	-0.109244	0.109244	TD
Merdibacter massiliensis	52.5	0.618874	-0.117647	0.117647	TD
Lacticaseibacillus paracasei	66.5	0.62172	0.117647	0.117647	Baseline
Massilimaliae timonensis	51.5	0.633322	-0.134454	0.134454	TD
Blautia argi	66	0.634757	0.109244	0.109244	Baseline
Actinomyces graevenitzii	67	0.647472	0.12605	0.12605	Baseline
Lachnospira eligens	53	0.649792	-0.109244	0.109244	TD
Bifidobacterium merycicum	66.5	0.651815	0.117647	0.117647	Baseline
[Ruminococcus] gnavus	67	0.656207	0.12605	0.12605	Baseline
Corynebacterium argentoratense	54.5	0.659875	-0.0840336	0.0840336	TD
Prevotella hominis	65	0.676243	0.092437	0.092437	Baseline
Merdimonas faecis	53	0.677417	-0.109244	0.109244	TD
Parabacteroides merdae	66.5	0.678349	0.117647	0.117647	Baseline
Olsenella_u_s	65.5	0.686779	0.10084	0.10084	Baseline
Terrisporobacter glycolicus	65	0.690511	0.092437	0.092437	Baseline
Christensenella minuta	66	0.692394	0.109244	0.109244	Baseline
Escherichia coli	66	0.695493	0.109244	0.109244	Baseline
Flintibacter_u_s	64	0.695659	0.0756303	0.0756303	Baseline
Actinomyces oris	53	0.701043	-0.109244	0.109244	TD
Actinomyces naeslundii	66	0.702786	0.109244	0.109244	Baseline
Ruminococcaceae_u_s	53	0.703094	-0.109244	0.109244	TD
Harryflintia acetispora	64.5	0.707144	0.0840336	0.0840336	Baseline
Akkermansia_u_s	65.5	0.708934	0.10084	0.10084	Baseline
Bacteroides stercoris	65.5	0.708934	0.10084	0.10084	Baseline
Enterocloster asparagiformis	65.5	0.719441	0.10084	0.10084	Baseline
Streptococcus rubneri	65	0.722635	0.092437	0.092437	Baseline
Bifidobacterium catenulatum	65.5	0.726743	0.10084	0.10084	Baseline
Holdemania massiliensis	65	0.729184	0.092437	0.092437	Baseline
Slackia_u_s	64.5	0.732576	0.0840336	0.0840336	Baseline
Waltera intestinalis	65	0.734281	0.092437	0.092437	Baseline
Phocaeicola sartorii	63	0.7403	0.0588235	0.0588235	Baseline
Lacticaseibacillus casei	63	0.7403	0.0588235	0.0588235	Baseline
Lactobacillus casei group	56	0.7403	-0.0588235	0.0588235	TD
Veillonella dispar	63	0.7403	0.0588235	0.0588235	Baseline
Clostridium saudiense	65	0.74897	0.092437	0.092437	Baseline
Anaerobutyricum soehngenii	65	0.756524	0.092437	0.092437	Baseline
Clostridium_u_s	54	0.756524	-0.092437	0.092437	TD
Streptococcus thermophilus	54	0.756524	-0.092437	0.092437	TD
Fenollaria timonensis	64	0.769649	0.0756303	0.0756303	Baseline
Prevotella copri	63.5	0.770129	0.0672269	0.0672269	Baseline
Bifidobacterium longum	54.5	0.774985	-0.0840336	0.0840336	TD
Varibaculum cambriense	64	0.776092	0.0756303	0.0756303	Baseline
Actinomycetaceae_u_s	64	0.777036	0.0756303	0.0756303	Baseline
Lachnospira pectinoschiza	64	0.781584	0.0756303	0.0756303	Baseline
Phascolarctobacterium faecium	64	0.781859	0.0756303	0.0756303	Baseline
TM7 phylum sp. oral taxon 346	56	0.78812	-0.0588235	0.0588235	TD
Flavonifractor_u_s	55	0.792974	-0.0756303	0.0756303	TD
Bacteroides eggerthii	55.5	0.798172	-0.0672269	0.0672269	TD
Eisenbergiella_u_s	63	0.802157	0.0588235	0.0588235	Baseline
Streptococcus intermedius	63	0.812191	0.0588235	0.0588235	Baseline
Massilicoli timonensis	63.5	0.818161	0.0672269	0.0672269	Baseline
Subdoligranulum variabile	63.5	0.823447	0.0672269	0.0672269	Baseline
Desulfovibrio_u_s	62	0.825115	0.0420168	0.0420168	Baseline
Megasphaera_u_s	62	0.825115	0.0420168	0.0420168	Baseline
Tyzzerella_u_s	56.5	0.834545	-0.0504202	0.0504202	TD
Slackia faecicanis	62	0.844849	0.0420168	0.0420168	Baseline
Alistipes communis	63	0.847041	0.0588235	0.0588235	Baseline
Intestinibacter bartlettii	63	0.852495	0.0588235	0.0588235	Baseline
[Ruminococcus] torques	56	0.852495	-0.0588235	0.0588235	TD
Agathobaculum desmolans	57	0.857439	-0.0420168	0.0420168	TD
Lacticaseibacillus rhamnosus	62	0.858048	0.0420168	0.0420168	Baseline
Schaalia georgiae	62.5	0.859404	0.0504202	0.0504202	Baseline
Ruminococcus callidus	56.5	0.871468	-0.0504202	0.0504202	TD
Actinomyces dentalis	56.5	0.871668	-0.0504202	0.0504202	TD
Acetivibrio ethanolgignens	61.5	0.882771	0.0336134	0.0336134	Baseline
Murimonas intestini	61.5	0.882771	0.0336134	0.0336134	Baseline
Slackia isoflavoniconvertens	62	0.894496	0.0420168	0.0420168	Baseline
Akkermansia muciniphila	57	0.895088	-0.0420168	0.0420168	TD
Ruminococcus bicirculans	62	0.896194	0.0420168	0.0420168	Baseline
Intestinimonas timonensis	57	0.89788	-0.0420168	0.0420168	TD
Bifidobacterium ruminantium	62	0.898015	0.0420168	0.0420168	Baseline
Anaeromassilibacillus_u_s	62	0.89888	0.0420168	0.0420168	Baseline
Peptoniphilus_u_s	61.5	0.900303	0.0336134	0.0336134	Baseline
Massilimicrobiota_u_s	57.5	0.909317	-0.0336134	0.0336134	TD
Agathobaculum_u_s	58	0.911793	-0.0252101	0.0252101	TD
Alistipes provencensis	58	0.911793	-0.0252101	0.0252101	TD
Streptococcus anginosus	58	0.911793	-0.0252101	0.0252101	TD
Pseudoflavonifractor capillosus	61.5	0.921124	0.0336134	0.0336134	Baseline
Granulicatella elegans	61	0.921933	0.0252101	0.0252101	Baseline
Massilistercora timonensis	61.5	0.923504	0.0336134	0.0336134	Baseline
Anaerostipes caccae	58	0.933464	-0.0252101	0.0252101	TD
Actinomyces johnsonii	61	0.948503	0.0252101	0.0252101	Baseline
Turicibacter_u_s	58	0.949349	-0.0252101	0.0252101	TD
Evtepia gabavorous	58	0.950593	-0.0252101	0.0252101	TD
Collinsella intestinalis	58.5	0.961	-0.0168067	0.0168067	TD
Prevotella_u_s	60.5	0.966703	0.0168067	0.0168067	Baseline
Bifidobacterium angulatum	60.5	0.973626	0.0168067	0.0168067	Baseline
Pseudoruminococcus massiliensis	58.5	0.974174	-0.0168067	0.0168067	TD
Actinomyces_u_s	59	1	-0.00840336	0.00840336	TD
Peptidiphaga gingivicola	59.5	1	0	0	TD
Alistipes indistinctus	59	1	-0.00840336	0.00840336	TD
Bacteroides rodentium	60	1	0.00840336	0.00840336	Baseline
Bifidobacterium adolescentis	59.5	1	0	0	TD
Bifidobacterium animalis	59.5	1	0	0	TD
Bifidobacterium pseudocatenulatum	59	1	-0.00840336	0.00840336	TD
Citrobacter freundii	59.5	1	0	0	TD
[Clostridium] innocuum	60	1	0.00840336	0.00840336	Baseline
Collinsella stercoris	59.5	1	0	0	TD
Desulfovibrio piger	59.5	1	0	0	TD
Dialister pneumosintes	59.5	1	0	0	TD
Enterobacter_u_s	59.5	1	0	0	TD
Erysipelatoclostridium_u_s	59	1	-0.00840336	0.00840336	TD
Extibacter muris	59	1	-0.00840336	0.00840336	TD
Klebsiella_u_s	59.5	1	0	0	TD
Klebsiella michiganensis	59.5	1	0	0	TD
Klebsiella oxytoca	59.5	1	0	0	TD
Klebsiella pneumoniae	59.5	1	0	0	TD
Kocuria_u_s	59.5	1	0	0	TD
Lachnoanaerobaculum_u_s	59.5	1	0	0	TD
Lactobacillus gasseri	59.5	1	0	0	TD
Lactonifactor longoviformis	59.5	1	0	0	TD
Mailhella massiliensis	59.5	1	0	0	TD
Mediterranea massiliensis	59	1	-0.00840336	0.00840336	TD
Mediterraneibacter massiliensis	60	1	0.00840336	0.00840336	Baseline
Parabacteroides chinchillae	59.5	1	0	0	TD
Shigella_u_s	59.5	1	0	0	TD
Slackia exigua	59.5	1	0	0	TD
Victivallis vadensis	59.5	1	0	0	TD

## Sheet: Shotgun_taxa_longitu_two_sided
feature	TimePoint1	TimePoint2	Wilcoxon_Stat	P_Value	%_change_WRT_first_timepoint	Direction_change_WRT_first_timepoint	Status	Rank_Biserial_r	Rank_Biserial_r_Abs
Abiotrophia defectiva	Baseline	Vanco	0	0.108809	12.1796	Increased	Tested	-1	1
Abiotrophia defectiva	Baseline	IniMTT	0	0.179712	0.820673	Increased	Tested	-1	1
Abiotrophia defectiva	Baseline	EndMTT	1	0.654721	0.611013	Increased	Tested	-0.333333	0.333333
Abiotrophia defectiva	Baseline	FollUp	2	0.59298	0.186285	Increased	Tested	-0.333333	0.333333
Abiotrophia defectiva	Vanco	IniMTT	1	0.144127	12.9343	Decreased	Tested	0.8	0.8
Abiotrophia defectiva	Vanco	EndMTT	0	0.108809	13.173	Decreased	Tested	1	1
Abiotrophia defectiva	Vanco	FollUp	0	0.108809	13.6566	Decreased	Tested	1	1
Abiotrophia defectiva	IniMTT	EndMTT	2	0.59298	0.211395	Decreased	Tested	0.333333	0.333333
Abiotrophia defectiva	IniMTT	FollUp	3.5	0.580712	0.639637	Decreased	Tested	0.3	0.3
Abiotrophia defectiva	EndMTT	FollUp	3	1	0.427338	Decreased	Tested	0	0
Abiotrophia_u_s	Baseline	Vanco	0	0.108809	12.9939	Increased	Tested	-1	1
Abiotrophia_u_s	Baseline	IniMTT	0	0.0678892	1.0891	Increased	Tested	-1	1
Abiotrophia_u_s	Baseline	EndMTT	1	0.654721	0.145573	Increased	Tested	-0.333333	0.333333
Abiotrophia_u_s	Baseline	FollUp	0	0.179712	0.622735	Increased	Tested	-1	1
Abiotrophia_u_s	Vanco	IniMTT	3	0.224916	13.6827	Decreased	Tested	0.6	0.6
Abiotrophia_u_s	Vanco	EndMTT	0	0.108809	14.7672	Decreased	Tested	1	1
Abiotrophia_u_s	Vanco	FollUp	0	0.108809	14.2187	Decreased	Tested	1	1
Abiotrophia_u_s	IniMTT	EndMTT	0	0.108809	0.953918	Decreased	Tested	1	1
Abiotrophia_u_s	IniMTT	FollUp	5	0.500184	0.471503	Decreased	Tested	0.333333	0.333333
Abiotrophia_u_s	EndMTT	FollUp	1.5	0.414216	0.477857	Increased	Tested	-0.5	0.5
Absiella_u_s	Baseline	Vanco	0	0.317311	3.07318	Decreased	Tested	1	1
Absiella_u_s	Baseline	IniMTT	0	0.317311	3.41436	Decreased	Tested	1	1
Absiella_u_s	Baseline	EndMTT	0	0.317311	3.236	Decreased	Tested	1	1
Absiella_u_s	Baseline	FollUp	0	0.317311	3.41436	Decreased	Tested	1	1
Absiella_u_s	Vanco	IniMTT	0	0.317311	0.331014	Decreased	Tested	1	1
Absiella_u_s	Vanco	EndMTT	0	0.317311	0.157974	Decreased	Tested	1	1
Absiella_u_s	Vanco	FollUp	0	0.317311	0.331014	Decreased	Tested	1	1
Absiella_u_s	IniMTT	EndMTT	0	0.317311	0.17247	Increased	Tested	-1	1
Absiella_u_s	IniMTT	FollUp			0	No change	Identical Values
Absiella_u_s	EndMTT	FollUp	0	0.317311	0.172767	Decreased	Tested	1	1
Acetivibrio ethanolgignens	Baseline	Vanco	0	0.317311	0.172767	Decreased	Tested	1	1
Acetivibrio ethanolgignens	Baseline	IniMTT	0	0.317311	0.172767	Decreased	Tested	1	1
Acetivibrio ethanolgignens	Baseline	EndMTT	0	0.317311	0.302817	Increased	Tested	-1	1
Acetivibrio ethanolgignens	Baseline	FollUp	0	0.179712	0.330492	Increased	Tested	-1	1
Acetivibrio ethanolgignens	Vanco	IniMTT			0	No change	Identical Values
Acetivibrio ethanolgignens	Vanco	EndMTT	0	0.317311	0.474764	Increased	Tested	-1	1
Acetivibrio ethanolgignens	Vanco	FollUp	0	0.179712	0.502391	Increased	Tested	-1	1
Acetivibrio ethanolgignens	IniMTT	EndMTT	0	0.317311	0.474764	Increased	Tested	-1	1
Acetivibrio ethanolgignens	IniMTT	FollUp	0	0.179712	0.502391	Increased	Tested	-1	1
Acetivibrio ethanolgignens	EndMTT	FollUp	1	0.654721	0.0277592	Increased	Tested	-0.333333	0.333333
Achromobacter insuavis	Baseline	Vanco			0	No change	Identical Values
Achromobacter insuavis	Baseline	IniMTT			0	No change	Identical Values
Achromobacter insuavis	Baseline	EndMTT			0	No change	Identical Values
Achromobacter insuavis	Baseline	FollUp			0	No change	Identical Values
Achromobacter insuavis	Vanco	IniMTT			0	No change	Identical Values
Achromobacter insuavis	Vanco	EndMTT			0	No change	Identical Values
Achromobacter insuavis	Vanco	FollUp			0	No change	Identical Values
Achromobacter insuavis	IniMTT	EndMTT			0	No change	Identical Values
Achromobacter insuavis	IniMTT	FollUp			0	No change	Identical Values
Achromobacter insuavis	EndMTT	FollUp			0	No change	Identical Values
Alloscardovia_u_s	Baseline	Vanco	1	0.654721	0.107013	Increased	Tested	-0.333333	0.333333
Alloscardovia_u_s	Baseline	IniMTT	0	0.179712	0.504928	Decreased	Tested	1	1
Alloscardovia_u_s	Baseline	EndMTT	0	0.179712	0.504928	Decreased	Tested	1	1
Alloscardovia_u_s	Baseline	FollUp	0	0.179712	0.504928	Decreased	Tested	1	1
Alloscardovia_u_s	Vanco	IniMTT	0	0.317311	0.612597	Decreased	Tested	1	1
Alloscardovia_u_s	Vanco	EndMTT	0	0.317311	0.612597	Decreased	Tested	1	1
Alloscardovia_u_s	Vanco	FollUp	0	0.317311	0.612597	Decreased	Tested	1	1
Alloscardovia_u_s	IniMTT	EndMTT			0	No change	Identical Values
Alloscardovia_u_s	IniMTT	FollUp			0	No change	Identical Values
Alloscardovia_u_s	EndMTT	FollUp			0	No change	Identical Values
Actinobaculum_u_s	Baseline	Vanco	3	1	1.25857	Increased	Tested	0	0
Actinobaculum_u_s	Baseline	IniMTT	0	0.108809	0.94003	Decreased	Tested	1	1
Actinobaculum_u_s	Baseline	EndMTT	0	0.108809	2.54623	Increased	Tested	-1	1
Actinobaculum_u_s	Baseline	FollUp	3	1	0.290625	Decreased	Tested	0	0
Actinobaculum_u_s	Vanco	IniMTT	1	0.654721	2.22662	Decreased	Tested	0.333333	0.333333
Actinobaculum_u_s	Vanco	EndMTT	1	0.285049	1.30407	Increased	Tested	-0.666667	0.666667
Actinobaculum_u_s	Vanco	FollUp	3	1	1.56894	Decreased	Tested	0	0
Actinobaculum_u_s	IniMTT	EndMTT	0	0.108809	3.45379	Increased	Tested	-1	1
Actinobaculum_u_s	IniMTT	FollUp	2	0.59298	0.643357	Increased	Tested	-0.333333	0.333333
Actinobaculum_u_s	EndMTT	FollUp	1	0.285049	2.91098	Decreased	Tested	0.666667	0.666667
Actinomyces bouchesdurhonensis	Baseline	Vanco	1	0.144127	1.95408	Increased	Tested	-0.8	0.8
Actinomyces bouchesdurhonensis	Baseline	IniMTT	3	1	0.130444	Decreased	Tested	0	0
Actinomyces bouchesdurhonensis	Baseline	EndMTT	4	0.705457	0.21614	Increased	Tested	-0.2	0.2
Actinomyces bouchesdurhonensis	Baseline	FollUp	0	0.317311	0.477029	Decreased	Tested	1	1
Actinomyces bouchesdurhonensis	Vanco	IniMTT	0	0.108809	2.12607	Decreased	Tested	1	1
Actinomyces bouchesdurhonensis	Vanco	EndMTT	1	0.144127	1.77258	Decreased	Tested	0.8	0.8
Actinomyces bouchesdurhonensis	Vanco	FollUp	0	0.108809	2.47957	Decreased	Tested	1	1
Actinomyces bouchesdurhonensis	IniMTT	EndMTT	0	0.157299	0.346133	Increased	Tested	-1	1
Actinomyces bouchesdurhonensis	IniMTT	FollUp	0	0.157299	0.346133	Decreased	Tested	1	1
Actinomyces bouchesdurhonensis	EndMTT	FollUp	0	0.0455003	0.69467	Decreased	Tested	1	1
Actinomyces dentalis	Baseline	Vanco	5	0.3125	10.683	Increased	Tested	-0.52381	0.52381
Actinomyces dentalis	Baseline	IniMTT	3	0.224916	1.74305	Increased	Tested	-0.6	0.6
Actinomyces dentalis	Baseline	EndMTT	0	0.0678892	5.81082	Increased	Tested	-1	1
Actinomyces dentalis	Baseline	FollUp	6	0.68447	1.98025	Increased	Tested	-0.2	0.2
Actinomyces dentalis	Vanco	IniMTT	2	0.138011	10.0093	Decreased	Tested	0.733333	0.733333
Actinomyces dentalis	Vanco	EndMTT	7	0.5625	5.45497	Decreased	Tested	0.333333	0.333333
Actinomyces dentalis	Vanco	FollUp	4	0.21875	9.74372	Decreased	Tested	0.619048	0.619048
Actinomyces dentalis	IniMTT	EndMTT	3	0.224916	4.13993	Increased	Tested	-0.6	0.6
Actinomyces dentalis	IniMTT	FollUp	9	0.84375	0.2414	Increased	Tested	0.142857	0.142857
Actinomyces dentalis	EndMTT	FollUp	2	0.09375	4.06689	Decreased	Tested	0.809524	0.809524
Schaalia georgiae	Baseline	Vanco	3	0.461451	0.549068	Increased	Tested	-0.4	0.4
Schaalia georgiae	Baseline	IniMTT	2	0.563703	0.173367	Decreased	Tested	0.333333	0.333333
Schaalia georgiae	Baseline	EndMTT	1.5	1	0	No change	Tested	0	0
Schaalia georgiae	Baseline	FollUp	2	0.563703	0.173367	Decreased	Tested	0.333333	0.333333
Schaalia georgiae	Vanco	IniMTT	0	0.179712	0.726423	Decreased	Tested	1	1
Schaalia georgiae	Vanco	EndMTT	2	0.59298	0.552099	Decreased	Tested	0.333333	0.333333
Schaalia georgiae	Vanco	FollUp	1	0.285049	0.726423	Decreased	Tested	0.666667	0.666667
Schaalia georgiae	IniMTT	EndMTT	0	0.317311	0.173066	Increased	Tested	-1	1
Schaalia georgiae	IniMTT	FollUp	1.5	1	0	No change	Tested	0	0
Schaalia georgiae	EndMTT	FollUp	2	0.563703	0.173367	Decreased	Tested	0.333333	0.333333
Actinomyces gerencseriae	Baseline	Vanco	10	1	0.565684	Increased	Tested	-0.047619	0.047619
Actinomyces gerencseriae	Baseline	IniMTT	3	0.224916	2.19404	Decreased	Tested	0.6	0.6
Actinomyces gerencseriae	Baseline	EndMTT	5	1	2.69878	Increased	Tested	0	0
Actinomyces gerencseriae	Baseline	FollUp	1	0.285049	1.69173	Decreased	Tested	0.666667	0.666667
Actinomyces gerencseriae	Vanco	IniMTT	0	0.0431144	2.77543	Decreased	Tested	1	1
Actinomyces gerencseriae	Vanco	EndMTT	7	0.892738	2.14523	Increased	Tested	-0.0666667	0.0666667
Actinomyces gerencseriae	Vanco	FollUp	6	0.4375	2.27025	Decreased	Tested	0.428571	0.428571
Actinomyces gerencseriae	IniMTT	EndMTT	2	0.273322	4.78778	Increased	Tested	-0.6	0.6
Actinomyces gerencseriae	IniMTT	FollUp	3	0.465209	0.491531	Increased	Tested	-0.4	0.4
Actinomyces gerencseriae	EndMTT	FollUp	0	0.108809	4.51229	Decreased	Tested	1	1
Actinomyces graevenitzii	Baseline	Vanco	3	0.465209	5.43714	Increased	Tested	-0.4	0.4
Actinomyces graevenitzii	Baseline	IniMTT	1	0.285049	2.19581	Decreased	Tested	0.666667	0.666667
Actinomyces graevenitzii	Baseline	EndMTT	0	0.179712	1.04486	Increased	Tested	-1	1
Actinomyces graevenitzii	Baseline	FollUp	1.5	0.197466	0.728097	Decreased	Tested	0.7	0.7
Actinomyces graevenitzii	Vanco	IniMTT	0	0.108809	8.07183	Decreased	Tested	1	1
Actinomyces graevenitzii	Vanco	EndMTT	3	0.465209	4.64483	Decreased	Tested	0.4	0.4
Actinomyces graevenitzii	Vanco	FollUp	1	0.144127	6.51973	Decreased	Tested	0.8	0.8
Actinomyces graevenitzii	IniMTT	EndMTT	0	0.108809	3.17105	Increased	Tested	-1	1
Actinomyces graevenitzii	IniMTT	FollUp	2	0.59298	1.43618	Increased	Tested	-0.333333	0.333333
Actinomyces graevenitzii	EndMTT	FollUp	1.5	0.197466	1.79168	Decreased	Tested	0.7	0.7
Actinomyces israelii	Baseline	Vanco	0	0.108809	4.51861	Increased	Tested	-1	1
Actinomyces israelii	Baseline	IniMTT	0	0.179712	1.26466	Increased	Tested	-1	1
Actinomyces israelii	Baseline	EndMTT	0	0.179712	2.19028	Increased	Tested	-1	1
Actinomyces israelii	Baseline	FollUp	0	0.317311	0.158754	Increased	Tested	-1	1
Actinomyces israelii	Vanco	IniMTT	0	0.108809	3.40794	Decreased	Tested	1	1
Actinomyces israelii	Vanco	EndMTT	0	0.108809	2.43852	Decreased	Tested	1	1
Actinomyces israelii	Vanco	FollUp	0	0.108809	4.56618	Decreased	Tested	1	1
Actinomyces israelii	IniMTT	EndMTT	0	0.179712	0.937475	Increased	Tested	-1	1
Actinomyces israelii	IniMTT	FollUp	0	0.179712	1.12007	Decreased	Tested	1	1
Actinomyces israelii	EndMTT	FollUp	0	0.179712	2.07702	Decreased	Tested	1	1
Actinomyces johnsonii	Baseline	Vanco	1	0.0796158	10.04	Increased	Tested	-0.866667	0.866667
Actinomyces johnsonii	Baseline	IniMTT	2	0.138011	2.72298	Increased	Tested	-0.733333	0.733333
Actinomyces johnsonii	Baseline	EndMTT	2	0.138011	5.86833	Increased	Tested	-0.733333	0.733333
Actinomyces johnsonii	Baseline	FollUp	6	0.68583	0.620053	Increased	Tested	0.2	0.2
Actinomyces johnsonii	Vanco	IniMTT	0	0.0678892	8.13367	Decreased	Tested	1	1
Actinomyces johnsonii	Vanco	EndMTT	4	0.345231	4.63728	Decreased	Tested	0.466667	0.466667
Actinomyces johnsonii	Vanco	FollUp	0	0.0678892	10.4713	Decreased	Tested	1	1
Actinomyces johnsonii	IniMTT	EndMTT	0	0.0678892	3.2334	Increased	Tested	-1	1
Actinomyces johnsonii	IniMTT	FollUp	1	0.285049	2.16179	Decreased	Tested	0.666667	0.666667
Actinomyces johnsonii	EndMTT	FollUp	0	0.0678892	5.57546	Decreased	Tested	1	1
Actinomyces massiliensis	Baseline	Vanco	7	0.5625	4.39368	Increased	Tested	-0.333333	0.333333
Actinomyces massiliensis	Baseline	IniMTT	3	0.224916	2.74361	Decreased	Tested	0.6	0.6
Actinomyces massiliensis	Baseline	EndMTT	6	0.4375	2.7327	Increased	Tested	-0.428571	0.428571
Actinomyces massiliensis	Baseline	FollUp	3	0.465209	1.41015	Decreased	Tested	0.4	0.4
Actinomyces massiliensis	Vanco	IniMTT	0	0.0431144	7.46529	Decreased	Tested	1	1
Actinomyces massiliensis	Vanco	EndMTT	9	0.84375	1.73732	Decreased	Tested	0.142857	0.142857
Actinomyces massiliensis	Vanco	FollUp	6	0.4375	6.07056	Decreased	Tested	0.428571	0.428571
Actinomyces massiliensis	IniMTT	EndMTT	2	0.09375	5.33007	Increased	Tested	-0.809524	0.809524
Actinomyces massiliensis	IniMTT	FollUp	6	0.68583	1.29784	Increased	Tested	-0.2	0.2
Actinomyces massiliensis	EndMTT	FollUp	0	0.0431144	4.25924	Decreased	Tested	1	1
Actinomyces naeslundii	Baseline	Vanco	5	0.3125	8.91753	Increased	Tested	-0.52381	0.52381
Actinomyces naeslundii	Baseline	IniMTT	9	0.84375	0.607281	Decreased	Tested	-0.142857	0.142857
Actinomyces naeslundii	Baseline	EndMTT	2	0.09375	10.4336	Increased	Tested	-0.809524	0.809524
Actinomyces naeslundii	Baseline	FollUp	7	0.892738	2.1803	Decreased	Tested	0.0666667	0.0666667
Actinomyces naeslundii	Vanco	IniMTT	1	0.0796158	10.4574	Decreased	Tested	0.866667	0.866667
Actinomyces naeslundii	Vanco	EndMTT	10	1	1.6645	Increased	Tested	-0.047619	0.047619
Actinomyces naeslundii	Vanco	FollUp	4	0.21875	12.1844	Decreased	Tested	0.619048	0.619048
Actinomyces naeslundii	IniMTT	EndMTT	1	0.0796158	10.9742	Increased	Tested	-0.866667	0.866667
Actinomyces naeslundii	IniMTT	FollUp	8	0.6875	1.56353	Decreased	Tested	0.238095	0.238095
Actinomyces naeslundii	EndMTT	FollUp	0	0.03125	14.0833	Decreased	Tested	1	1
Schaalia odontolytica	Baseline	Vanco	2	0.138011	7.39749	Increased	Tested	-0.733333	0.733333
Schaalia odontolytica	Baseline	IniMTT	7	0.892738	0.863425	Decreased	Tested	0.0666667	0.0666667
Schaalia odontolytica	Baseline	EndMTT	8	0.6875	0.350118	Increased	Tested	-0.238095	0.238095
Schaalia odontolytica	Baseline	FollUp	9	0.84375	1.40296	Increased	Tested	-0.142857	0.142857
Schaalia odontolytica	Vanco	IniMTT	3	0.224916	8.92083	Decreased	Tested	0.6	0.6
Schaalia odontolytica	Vanco	EndMTT	1.5	0.09375	7.61034	Decreased	Tested	0.857143	0.857143
Schaalia odontolytica	Vanco	FollUp	1.5	0.09375	6.47339	Decreased	Tested	0.857143	0.857143
Schaalia odontolytica	IniMTT	EndMTT	8	0.6875	1.20315	Increased	Tested	-0.238095	0.238095
Schaalia odontolytica	IniMTT	FollUp	6	0.68583	2.24698	Increased	Tested	-0.2	0.2
Schaalia odontolytica	EndMTT	FollUp	4	0.715001	1.05654	Increased	Tested	0.2	0.2
Actinomyces oris	Baseline	Vanco	3	0.224916	5.34689	Increased	Tested	-0.6	0.6
Actinomyces oris	Baseline	IniMTT	3	0.465209	1.34438	Decreased	Tested	0.4	0.4
Actinomyces oris	Baseline	EndMTT	1	0.144127	7.52275	Increased	Tested	-0.8	0.8
Actinomyces oris	Baseline	FollUp	4	0.345231	1.15496	Decreased	Tested	0.466667	0.466667
Actinomyces oris	Vanco	IniMTT	1.5	0.104059	7.06925	Decreased	Tested	0.8	0.8
Actinomyces oris	Vanco	EndMTT	9	0.84375	2.29878	Increased	Tested	-0.142857	0.142857
Actinomyces oris	Vanco	FollUp	3	0.224916	6.86913	Decreased	Tested	0.6	0.6
Actinomyces oris	IniMTT	EndMTT	0	0.0678892	8.7495	Increased	Tested	-1	1
Actinomyces oris	IniMTT	FollUp	6.5	0.786457	0.186906	Increased	Tested	-0.133333	0.133333
Actinomyces oris	EndMTT	FollUp	0	0.0678892	9.38362	Decreased	Tested	1	1
Actinomyces_u_s	Baseline	Vanco	8	0.6875	6.67226	Increased	Tested	-0.238095	0.238095
Actinomyces_u_s	Baseline	IniMTT	6	0.4375	8.43427	Decreased	Tested	0.428571	0.428571
Actinomyces_u_s	Baseline	EndMTT	5	0.3125	4.72868	Increased	Tested	-0.52381	0.52381
Actinomyces_u_s	Baseline	FollUp	6	0.4375	5.6465	Decreased	Tested	0.428571	0.428571
Actinomyces_u_s	Vanco	IniMTT	1	0.0796158	16.1865	Decreased	Tested	0.866667	0.866667
Actinomyces_u_s	Vanco	EndMTT	10	1	2.08254	Decreased	Tested	0.047619	0.047619
Actinomyces_u_s	Vanco	FollUp	6	0.4375	13.1995	Decreased	Tested	0.428571	0.428571
Actinomyces_u_s	IniMTT	EndMTT	1	0.0625	12.1391	Increased	Tested	-0.904762	0.904762
Actinomyces_u_s	IniMTT	FollUp	9	0.84375	2.57093	Increased	Tested	-0.142857	0.142857
Actinomyces_u_s	EndMTT	FollUp	0	0.0431144	10.8901	Decreased	Tested	1	1
Schaalia turicensis	Baseline	Vanco	0	0.179712	3.07509	Decreased	Tested	1	1
Schaalia turicensis	Baseline	IniMTT	0	0.179712	3.07509	Decreased	Tested	1	1
Schaalia turicensis	Baseline	EndMTT	0	0.179712	3.07509	Decreased	Tested	1	1
Schaalia turicensis	Baseline	FollUp	0	0.179712	3.07509	Decreased	Tested	1	1
Schaalia turicensis	Vanco	IniMTT			0	No change	Identical Values
Schaalia turicensis	Vanco	EndMTT			0	No change	Identical Values
Schaalia turicensis	Vanco	FollUp			0	No change	Identical Values
Schaalia turicensis	IniMTT	EndMTT			0	No change	Identical Values
Schaalia turicensis	IniMTT	FollUp			0	No change	Identical Values
Schaalia turicensis	EndMTT	FollUp			0	No change	Identical Values
Actinomyces viscosus	Baseline	Vanco	3	0.465209	5.49257	Increased	Tested	-0.4	0.4
Actinomyces viscosus	Baseline	IniMTT	1	0.144127	2.38873	Decreased	Tested	0.8	0.8
Actinomyces viscosus	Baseline	EndMTT	5	0.500184	8.72173	Increased	Tested	-0.333333	0.333333
Actinomyces viscosus	Baseline	FollUp	4	0.715001	1.47408	Increased	Tested	0.2	0.2
Actinomyces viscosus	Vanco	IniMTT	0	0.179712	8.33935	Decreased	Tested	1	1
Actinomyces viscosus	Vanco	EndMTT	4	0.715001	3.41684	Increased	Tested	-0.2	0.2
Actinomyces viscosus	Vanco	FollUp	5	0.500184	4.25203	Decreased	Tested	0.333333	0.333333
Actinomyces viscosus	IniMTT	EndMTT	0	0.0678892	10.8513	Increased	Tested	-1	1
Actinomyces viscosus	IniMTT	FollUp	3	0.224916	3.77269	Increased	Tested	-0.6	0.6
Actinomyces viscosus	EndMTT	FollUp	0	0.0678892	7.94017	Decreased	Tested	1	1
Peptidiphaga gingivicola	Baseline	Vanco	0	0.108809	4.73789	Increased	Tested	-1	1
Peptidiphaga gingivicola	Baseline	IniMTT	0	0.179712	0.488216	Increased	Tested	-1	1
Peptidiphaga gingivicola	Baseline	EndMTT	0	0.317311	0.475584	Increased	Tested	-1	1
Peptidiphaga gingivicola	Baseline	FollUp	1	0.654721	0.157724	Increased	Tested	-0.333333	0.333333
Peptidiphaga gingivicola	Vanco	IniMTT	0	0.108809	4.46103	Decreased	Tested	1	1
Peptidiphaga gingivicola	Vanco	EndMTT	0	0.108809	4.47429	Decreased	Tested	1	1
Peptidiphaga gingivicola	Vanco	FollUp	2	0.273322	4.80796	Decreased	Tested	0.6	0.6
Peptidiphaga gingivicola	IniMTT	EndMTT	1	0.654721	0.012694	Decreased	Tested	0.333333	0.333333
Peptidiphaga gingivicola	IniMTT	FollUp	2	0.563703	0.332113	Decreased	Tested	0.333333	0.333333
Peptidiphaga gingivicola	EndMTT	FollUp	2	0.59298	0.319379	Decreased	Tested	0.333333	0.333333
Actinomycetaceae_u_s	Baseline	Vanco	4	0.21875	4.14305	Increased	Tested	-0.619048	0.619048
Actinomycetaceae_u_s	Baseline	IniMTT	4.5	0.853923	0.0235743	Increased	Tested	-0.1	0.1
Actinomycetaceae_u_s	Baseline	EndMTT	3	0.461451	0.399729	Increased	Tested	-0.4	0.4
Actinomycetaceae_u_s	Baseline	FollUp	2	0.256839	0.788861	Decreased	Tested	0.6	0.6
Actinomycetaceae_u_s	Vanco	IniMTT	0	0.108809	4.29753	Decreased	Tested	1	1
Actinomycetaceae_u_s	Vanco	EndMTT	5	0.500184	3.90512	Decreased	Tested	0.333333	0.333333
Actinomycetaceae_u_s	Vanco	FollUp	0	0.0421682	5.14508	Decreased	Tested	1	1
Actinomycetaceae_u_s	IniMTT	EndMTT	3.5	0.15625	0.376243	Increased	Tested	-0.666667	0.666667
Actinomycetaceae_u_s	IniMTT	FollUp	1.5	0.197466	0.812626	Decreased	Tested	0.7	0.7
Actinomycetaceae_u_s	EndMTT	FollUp	0	0.0384339	1.19336	Decreased	Tested	1	1
Adlercreutzia equolifaciens	Baseline	Vanco	5	0.500184	4.42379	Decreased	Tested	0.333333	0.333333
Adlercreutzia equolifaciens	Baseline	IniMTT	8	0.6875	1.7388	Increased	Tested	-0.238095	0.238095
Adlercreutzia equolifaciens	Baseline	EndMTT	3	0.15625	8.98146	Increased	Tested	-0.714286	0.714286
Adlercreutzia equolifaciens	Baseline	FollUp	10	1	1.2851	Increased	Tested	-0.047619	0.047619
Adlercreutzia equolifaciens	Vanco	IniMTT	8	0.6875	5.90152	Increased	Tested	-0.238095	0.238095
Adlercreutzia equolifaciens	Vanco	EndMTT	3	0.15625	12.8374	Increased	Tested	-0.714286	0.714286
Adlercreutzia equolifaciens	Vanco	FollUp	9	0.84375	5.46704	Increased	Tested	-0.142857	0.142857
Adlercreutzia equolifaciens	IniMTT	EndMTT	5	0.3125	7.37082	Increased	Tested	-0.52381	0.52381
Adlercreutzia equolifaciens	IniMTT	FollUp	10	1	0.46173	Decreased	Tested	0.047619	0.047619
Adlercreutzia equolifaciens	EndMTT	FollUp	6	0.4375	8.45582	Decreased	Tested	0.428571	0.428571
Adlercreutzia muris	Baseline	Vanco	0	0.317311	0.477029	Decreased	Tested	1	1
Adlercreutzia muris	Baseline	IniMTT	0	0.317311	0.477029	Decreased	Tested	1	1
Adlercreutzia muris	Baseline	EndMTT	0	0.317311	0.303736	Decreased	Tested	1	1
Adlercreutzia muris	Baseline	FollUp	0	0.317311	0.477029	Decreased	Tested	1	1
Adlercreutzia muris	Vanco	IniMTT			0	No change	Identical Values
Adlercreutzia muris	Vanco	EndMTT	0	0.317311	0.17247	Increased	Tested	-1	1
Adlercreutzia muris	Vanco	FollUp			0	No change	Identical Values
Adlercreutzia muris	IniMTT	EndMTT	0	0.317311	0.17247	Increased	Tested	-1	1
Adlercreutzia muris	IniMTT	FollUp			0	No change	Identical Values
Adlercreutzia muris	EndMTT	FollUp	0	0.317311	0.172767	Decreased	Tested	1	1
Agathobaculum butyriciproducens	Baseline	Vanco	0	0.0431144	17.6566	Decreased	Tested	1	1
Agathobaculum butyriciproducens	Baseline	IniMTT	7	0.892738	1.34127	Increased	Tested	0.0666667	0.0666667
Agathobaculum butyriciproducens	Baseline	EndMTT	3	0.224916	5.27896	Decreased	Tested	0.6	0.6
Agathobaculum butyriciproducens	Baseline	FollUp	7	0.5625	5.73411	Increased	Tested	-0.333333	0.333333
Agathobaculum butyriciproducens	Vanco	IniMTT	2	0.138011	16.1469	Increased	Tested	-0.733333	0.733333
Agathobaculum butyriciproducens	Vanco	EndMTT	2	0.138011	10.5202	Increased	Tested	-0.733333	0.733333
Agathobaculum butyriciproducens	Vanco	FollUp	0	0.03125	19.8805	Increased	Tested	-1	1
Agathobaculum butyriciproducens	IniMTT	EndMTT	4.5	0.416366	6.71023	Decreased	Tested	0.4	0.4
Agathobaculum butyriciproducens	IniMTT	FollUp	6	0.4375	4.45257	Increased	Tested	-0.428571	0.428571
Agathobaculum butyriciproducens	EndMTT	FollUp	0	0.03125	10.4609	Increased	Tested	-1	1
Agathobaculum_u_s	Baseline	Vanco	0	0.317311	0.331014	Decreased	Tested	1	1
Agathobaculum_u_s	Baseline	IniMTT	0	0.317311	0.331014	Decreased	Tested	1	1
Agathobaculum_u_s	Baseline	EndMTT	0	0.317311	0.145322	Increased	Tested	-1	1
Agathobaculum_u_s	Baseline	FollUp	0	0.317311	0.331014	Decreased	Tested	1	1
Agathobaculum_u_s	Vanco	IniMTT			0	No change	Identical Values
Agathobaculum_u_s	Vanco	EndMTT	0	0.317311	0.474764	Increased	Tested	-1	1
Agathobaculum_u_s	Vanco	FollUp			0	No change	Identical Values
Agathobaculum_u_s	IniMTT	EndMTT	0	0.317311	0.474764	Increased	Tested	-1	1
Agathobaculum_u_s	IniMTT	FollUp			0	No change	Identical Values
Agathobaculum_u_s	EndMTT	FollUp	0	0.317311	0.477029	Decreased	Tested	1	1
Akkermansia muciniphila	Baseline	Vanco	0	0.179712	5.45162	Increased	Tested	-1	1
Akkermansia muciniphila	Baseline	IniMTT	0	0.0678892	18.4024	Increased	Tested	-1	1
Akkermansia muciniphila	Baseline	EndMTT	0	0.108809	13.4447	Increased	Tested	-1	1
Akkermansia muciniphila	Baseline	FollUp	0	0.179712	6.2098	Increased	Tested	-1	1
Akkermansia muciniphila	Vanco	IniMTT	1	0.144127	13.6975	Increased	Tested	-0.8	0.8
Akkermansia muciniphila	Vanco	EndMTT	1	0.285049	8.45391	Increased	Tested	-0.666667	0.666667
Akkermansia muciniphila	Vanco	FollUp	3	1	0.801892	Increased	Tested	0	0
Akkermansia muciniphila	IniMTT	EndMTT	1	0.144127	6.07581	Decreased	Tested	0.8	0.8
Akkermansia muciniphila	IniMTT	FollUp	0	0.0678892	14.9423	Decreased	Tested	1	1
Akkermansia muciniphila	EndMTT	FollUp	1	0.285049	8.35866	Decreased	Tested	0.666667	0.666667
Akkermansia_u_s	Baseline	Vanco	1	0.654721	0.594176	Increased	Tested	-0.333333	0.333333
Akkermansia_u_s	Baseline	IniMTT	4	0.345231	11.1219	Increased	Tested	-0.466667	0.466667
Akkermansia_u_s	Baseline	EndMTT	4	0.345231	6.03592	Increased	Tested	-0.466667	0.466667
Akkermansia_u_s	Baseline	FollUp	5	0.500184	1.47145	Increased	Tested	-0.333333	0.333333
Akkermansia_u_s	Vanco	IniMTT	5	0.500184	10.5906	Increased	Tested	-0.333333	0.333333
Akkermansia_u_s	Vanco	EndMTT	5	0.500184	5.47427	Increased	Tested	-0.333333	0.333333
Akkermansia_u_s	Vanco	FollUp	5	0.500184	0.882517	Increased	Tested	-0.333333	0.333333
Akkermansia_u_s	IniMTT	EndMTT	1	0.0796158	5.72239	Decreased	Tested	0.866667	0.866667
Akkermansia_u_s	IniMTT	FollUp	4	0.21875	10.858	Decreased	Tested	0.619048	0.619048
Akkermansia_u_s	EndMTT	FollUp	6	0.68583	4.85767	Decreased	Tested	0.2	0.2
Alistipes finegoldii	Baseline	Vanco	0	0.03125	39.891	Decreased	Tested	1	1
Alistipes finegoldii	Baseline	IniMTT	10	1	2.04005	Decreased	Tested	0.047619	0.047619
Alistipes finegoldii	Baseline	EndMTT	10	1	2.8805	Increased	Tested	0.047619	0.047619
Alistipes finegoldii	Baseline	FollUp	8	0.6875	10.3679	Decreased	Tested	0.238095	0.238095
Alistipes finegoldii	Vanco	IniMTT	3	0.15625	27.0575	Increased	Tested	-0.714286	0.714286
Alistipes finegoldii	Vanco	EndMTT	2	0.09375	30.5749	Increased	Tested	-0.809524	0.809524
Alistipes finegoldii	Vanco	FollUp	1	0.0625	21.1044	Increased	Tested	-0.904762	0.904762
Alistipes finegoldii	IniMTT	EndMTT	7	0.5625	4.82217	Increased	Tested	-0.333333	0.333333
Alistipes finegoldii	IniMTT	FollUp	8	0.6875	8.16136	Decreased	Tested	0.238095	0.238095
Alistipes finegoldii	EndMTT	FollUp	6	0.4375	13.6413	Decreased	Tested	0.428571	0.428571
Alistipes indistinctus	Baseline	Vanco	2	0.59298	2.56314	Decreased	Tested	0.333333	0.333333
Alistipes indistinctus	Baseline	IniMTT	3	1	2.13276	Decreased	Tested	0	0
Alistipes indistinctus	Baseline	EndMTT	3	0.465209	6.73593	Increased	Tested	-0.4	0.4
Alistipes indistinctus	Baseline	FollUp	2	0.273322	10.7922	Increased	Tested	-0.6	0.6
Alistipes indistinctus	Vanco	IniMTT	4	0.715001	0.419628	Increased	Tested	0.2	0.2
Alistipes indistinctus	Vanco	EndMTT	3	0.465209	9.06668	Increased	Tested	-0.4	0.4
Alistipes indistinctus	Vanco	FollUp	0	0.0678892	13.0216	Increased	Tested	-1	1
Alistipes indistinctus	IniMTT	EndMTT	0	0.108809	8.68349	Increased	Tested	-1	1
Alistipes indistinctus	IniMTT	FollUp	2	0.273322	12.6551	Increased	Tested	-0.6	0.6
Alistipes indistinctus	EndMTT	FollUp	4	0.715001	4.34927	Increased	Tested	-0.2	0.2
Alistipes onderdonkii	Baseline	Vanco	2	0.09375	49.2299	Decreased	Tested	0.809524	0.809524
Alistipes onderdonkii	Baseline	IniMTT	3	0.15625	25.1223	Decreased	Tested	0.714286	0.714286
Alistipes onderdonkii	Baseline	EndMTT	4	0.21875	14.8826	Decreased	Tested	0.619048	0.619048
Alistipes onderdonkii	Baseline	FollUp	5	0.3125	12.4118	Decreased	Tested	0.52381	0.52381
Alistipes onderdonkii	Vanco	IniMTT	7	0.5625	16.1546	Increased	Tested	-0.333333	0.333333
Alistipes onderdonkii	Vanco	EndMTT	3	0.15625	23.0164	Increased	Tested	-0.714286	0.714286
Alistipes onderdonkii	Vanco	FollUp	2	0.09375	24.672	Increased	Tested	-0.809524	0.809524
Alistipes onderdonkii	IniMTT	EndMTT	7	0.5625	8.18378	Increased	Tested	-0.333333	0.333333
Alistipes onderdonkii	IniMTT	FollUp	10	1	10.1584	Increased	Tested	-0.047619	0.047619
Alistipes onderdonkii	EndMTT	FollUp	9	0.84375	2.15067	Increased	Tested	-0.142857	0.142857
Alistipes provencensis	Baseline	Vanco	0	0.317311	0.17247	Increased	Tested	-1	1
Alistipes provencensis	Baseline	IniMTT			0	No change	Identical Values
Alistipes provencensis	Baseline	EndMTT	0	0.317311	0.329922	Increased	Tested	-1	1
Alistipes provencensis	Baseline	FollUp	0	0.317311	0.474764	Increased	Tested	-1	1
Alistipes provencensis	Vanco	IniMTT	0	0.317311	0.172767	Decreased	Tested	1	1
Alistipes provencensis	Vanco	EndMTT	1	0.654721	0.157724	Increased	Tested	-0.333333	0.333333
Alistipes provencensis	Vanco	FollUp	0	0.317311	0.302817	Increased	Tested	-1	1
Alistipes provencensis	IniMTT	EndMTT	0	0.317311	0.329922	Increased	Tested	-1	1
Alistipes provencensis	IniMTT	FollUp	0	0.317311	0.474764	Increased	Tested	-1	1
Alistipes provencensis	EndMTT	FollUp	1	0.654721	0.145322	Increased	Tested	-0.333333	0.333333
Alistipes putredinis	Baseline	Vanco	2	0.138011	36.432	Decreased	Tested	0.733333	0.733333
Alistipes putredinis	Baseline	IniMTT	0	0.0431144	44.164	Decreased	Tested	1	1
Alistipes putredinis	Baseline	EndMTT	5	0.500184	9.70961	Decreased	Tested	0.333333	0.333333
Alistipes putredinis	Baseline	FollUp	5	0.500184	11.045	Decreased	Tested	0.333333	0.333333
Alistipes putredinis	Vanco	IniMTT	5	0.500184	5.66732	Decreased	Tested	0.333333	0.333333
Alistipes putredinis	Vanco	EndMTT	4	0.345231	19.5866	Increased	Tested	-0.466667	0.466667
Alistipes putredinis	Vanco	FollUp	3	0.224916	18.6078	Increased	Tested	-0.6	0.6
Alistipes putredinis	IniMTT	EndMTT	3	0.224916	23.8995	Increased	Tested	-0.6	0.6
Alistipes putredinis	IniMTT	FollUp	3	0.224916	22.9732	Increased	Tested	-0.6	0.6
Alistipes putredinis	EndMTT	FollUp	4	0.715001	1.2172	Decreased	Tested	0.2	0.2
Alistipes senegalensis	Baseline	Vanco	3	0.465209	2.31513	Decreased	Tested	0.4	0.4
Alistipes senegalensis	Baseline	IniMTT	2	0.59298	0.727496	Increased	Tested	-0.333333	0.333333
Alistipes senegalensis	Baseline	EndMTT	0	0.0431144	4.49456	Increased	Tested	-1	1
Alistipes senegalensis	Baseline	FollUp	5	1	1.47793	Increased	Tested	0	0
Alistipes senegalensis	Vanco	IniMTT	3	0.465209	2.97378	Increased	Tested	-0.4	0.4
Alistipes senegalensis	Vanco	EndMTT	3	0.222801	6.65561	Increased	Tested	-0.6	0.6
Alistipes senegalensis	Vanco	FollUp	0	0.108809	3.70724	Increased	Tested	-1	1
Alistipes senegalensis	IniMTT	EndMTT	2	0.138011	3.79467	Increased	Tested	-0.733333	0.733333
Alistipes senegalensis	IniMTT	FollUp	4	0.715001	0.755935	Increased	Tested	0.2	0.2
Alistipes senegalensis	EndMTT	FollUp	3	0.465209	3.15859	Decreased	Tested	0.4	0.4
Alistipes shahii	Baseline	Vanco	4	0.21875	20.8989	Decreased	Tested	0.619048	0.619048
Alistipes shahii	Baseline	IniMTT	9	0.84375	1.72685	Increased	Tested	-0.142857	0.142857
Alistipes shahii	Baseline	EndMTT	5	0.3125	8.39744	Increased	Tested	-0.52381	0.52381
Alistipes shahii	Baseline	FollUp	10	1	7.97081	Increased	Tested	-0.047619	0.047619
Alistipes shahii	Vanco	IniMTT	3	0.224916	18.7146	Increased	Tested	-0.6	0.6
Alistipes shahii	Vanco	EndMTT	1	0.0796158	24.2321	Increased	Tested	-0.866667	0.866667
Alistipes shahii	Vanco	FollUp	0	0.0431144	23.8792	Increased	Tested	-1	1
Alistipes shahii	IniMTT	EndMTT	4	0.345231	6.78781	Increased	Tested	-0.466667	0.466667
Alistipes shahii	IniMTT	FollUp	6	0.68583	6.35368	Increased	Tested	0.2	0.2
Alistipes shahii	EndMTT	FollUp	5	0.500184	0.465738	Decreased	Tested	0.333333	0.333333
Alistipes communis	Baseline	Vanco	3	0.224916	16.637	Decreased	Tested	0.6	0.6
Alistipes communis	Baseline	IniMTT	0	0.0431144	26.9392	Decreased	Tested	1	1
Alistipes communis	Baseline	EndMTT	5	0.500184	9.69534	Decreased	Tested	0.333333	0.333333
Alistipes communis	Baseline	FollUp	6	0.68583	7.65497	Decreased	Tested	0.2	0.2
Alistipes communis	Vanco	IniMTT	5	0.500184	8.83272	Decreased	Tested	0.333333	0.333333
Alistipes communis	Vanco	EndMTT	5	0.500184	5.95147	Increased	Tested	-0.333333	0.333333
Alistipes communis	Vanco	FollUp	6	0.68583	7.7008	Increased	Tested	-0.2	0.2
Alistipes communis	IniMTT	EndMTT	0	0.108809	13.5843	Increased	Tested	-1	1
Alistipes communis	IniMTT	FollUp	0	0.108809	15.1917	Increased	Tested	-1	1
Alistipes communis	EndMTT	FollUp	3	1	1.86003	Increased	Tested	0	0
Alistipes_u_s	Baseline	Vanco	1	0.0625	57.8658	Decreased	Tested	0.904762	0.904762
Alistipes_u_s	Baseline	IniMTT	10	1	1.91286	Decreased	Tested	-0.047619	0.047619
Alistipes_u_s	Baseline	EndMTT	9	0.84375	1.06362	Decreased	Tested	0.142857	0.142857
Alistipes_u_s	Baseline	FollUp	9	0.84375	2.55343	Decreased	Tested	0.142857	0.142857
Alistipes_u_s	Vanco	IniMTT	4	0.21875	35.4434	Increased	Tested	-0.619048	0.619048
Alistipes_u_s	Vanco	EndMTT	2	0.09375	35.9813	Increased	Tested	-0.809524	0.809524
Alistipes_u_s	Vanco	FollUp	0	0.03125	35.0376	Increased	Tested	-1	1
Alistipes_u_s	IniMTT	EndMTT	9	0.84375	0.8333	Increased	Tested	0.142857	0.142857
Alistipes_u_s	IniMTT	FollUp	6	0.4375	0.628548	Decreased	Tested	0.428571	0.428571
Alistipes_u_s	EndMTT	FollUp	10	1	1.47413	Decreased	Tested	-0.047619	0.047619
Alistipes timonensis	Baseline	Vanco	1	0.654721	0.265545	Decreased	Tested	0.333333	0.333333
Alistipes timonensis	Baseline	IniMTT	3	1	0.197019	Increased	Tested	0	0
Alistipes timonensis	Baseline	EndMTT	2.5	0.785495	0.173526	Increased	Tested	-0.166667	0.166667
Alistipes timonensis	Baseline	FollUp	1.5	1	0	No change	Tested	0	0
Alistipes timonensis	Vanco	IniMTT	3	0.461451	0.461338	Increased	Tested	-0.4	0.4
Alistipes timonensis	Vanco	EndMTT	1	0.654721	0.437908	Increased	Tested	-0.333333	0.333333
Alistipes timonensis	Vanco	FollUp	1	0.654721	0.264841	Increased	Tested	-0.333333	0.333333
Alistipes timonensis	IniMTT	EndMTT	5	1	0.0235389	Decreased	Tested	0	0
Alistipes timonensis	IniMTT	FollUp	3	1	0.197408	Decreased	Tested	0	0
Alistipes timonensis	EndMTT	FollUp	1	0.654721	0.173828	Decreased	Tested	0.333333	0.333333
Allisonella histaminiformans	Baseline	Vanco	0	0.179712	3.64125	Increased	Tested	-1	1
Allisonella histaminiformans	Baseline	IniMTT	0	0.317311	2.4485	Increased	Tested	-1	1
Allisonella histaminiformans	Baseline	EndMTT	0	0.317311	2.79055	Increased	Tested	-1	1
Allisonella histaminiformans	Baseline	FollUp	0	0.179712	7.10904	Increased	Tested	-1	1
Allisonella histaminiformans	Vanco	IniMTT	0	0.179712	1.23783	Decreased	Tested	1	1
Allisonella histaminiformans	Vanco	EndMTT	0	0.179712	0.88285	Decreased	Tested	1	1
Allisonella histaminiformans	Vanco	FollUp	1	0.654721	3.59883	Increased	Tested	-0.333333	0.333333
Allisonella histaminiformans	IniMTT	EndMTT	0	0.317311	0.350637	Increased	Tested	-1	1
Allisonella histaminiformans	IniMTT	FollUp	0	0.179712	4.77752	Increased	Tested	-1	1
Allisonella histaminiformans	EndMTT	FollUp	0	0.179712	4.44246	Increased	Tested	-1	1
Alterileibacterium massiliense	Baseline	Vanco	0	0.108809	2.93575	Decreased	Tested	1	1
Alterileibacterium massiliense	Baseline	IniMTT	0	0.108809	2.93575	Decreased	Tested	1	1
Alterileibacterium massiliense	Baseline	EndMTT	0	0.108809	2.75822	Decreased	Tested	1	1
Alterileibacterium massiliense	Baseline	FollUp	0	0.108809	2.93575	Decreased	Tested	1	1
Alterileibacterium massiliense	Vanco	IniMTT			0	No change	Identical Values
Alterileibacterium massiliense	Vanco	EndMTT	0	0.317311	0.17247	Increased	Tested	-1	1
Alterileibacterium massiliense	Vanco	FollUp			0	No change	Identical Values
Alterileibacterium massiliense	IniMTT	EndMTT	0	0.317311	0.17247	Increased	Tested	-1	1
Alterileibacterium massiliense	IniMTT	FollUp			0	No change	Identical Values
Alterileibacterium massiliense	EndMTT	FollUp	0	0.317311	0.172767	Decreased	Tested	1	1
Aminipila_u_s	Baseline	Vanco	0	0.317311	0.172767	Decreased	Tested	1	1
Aminipila_u_s	Baseline	IniMTT	0	0.317311	0.172767	Decreased	Tested	1	1
Aminipila_u_s	Baseline	EndMTT	0	0.317311	0.172767	Decreased	Tested	1	1
Aminipila_u_s	Baseline	FollUp	0	0.317311	0.172767	Decreased	Tested	1	1
Aminipila_u_s	Vanco	IniMTT			0	No change	Identical Values
Aminipila_u_s	Vanco	EndMTT			0	No change	Identical Values
Aminipila_u_s	Vanco	FollUp			0	No change	Identical Values
Aminipila_u_s	IniMTT	EndMTT			0	No change	Identical Values
Aminipila_u_s	IniMTT	FollUp			0	No change	Identical Values
Aminipila_u_s	EndMTT	FollUp			0	No change	Identical Values
Anaerobutyricum soehngenii	Baseline	Vanco	0	0.0431144	25.6202	Decreased	Tested	1	1
Anaerobutyricum soehngenii	Baseline	IniMTT	3	0.15625	25.6239	Decreased	Tested	0.714286	0.714286
Anaerobutyricum soehngenii	Baseline	EndMTT	7	0.5625	0.830028	Decreased	Tested	-0.333333	0.333333
Anaerobutyricum soehngenii	Baseline	FollUp	9	0.84375	9.03967	Increased	Tested	-0.142857	0.142857
Anaerobutyricum soehngenii	Vanco	IniMTT	9	0.84375	0.00296057	Decreased	Tested	-0.142857	0.142857
Anaerobutyricum soehngenii	Vanco	EndMTT	5	0.3125	19.7342	Increased	Tested	-0.52381	0.52381
Anaerobutyricum soehngenii	Vanco	FollUp	1	0.0625	27.591	Increased	Tested	-0.904762	0.904762
Anaerobutyricum soehngenii	IniMTT	EndMTT	0	0.0431144	19.7366	Increased	Tested	-1	1
Anaerobutyricum soehngenii	IniMTT	FollUp	0	0.03125	27.5931	Increased	Tested	-1	1
Anaerobutyricum soehngenii	EndMTT	FollUp	10	1	9.78845	Increased	Tested	-0.047619	0.047619
Anaerococcus obesiensis	Baseline	Vanco			0	No change	Identical Values
Anaerococcus obesiensis	Baseline	IniMTT			0	No change	Identical Values
Anaerococcus obesiensis	Baseline	EndMTT			0	No change	Identical Values
Anaerococcus obesiensis	Baseline	FollUp	0	0.179712	0.647233	Increased	Tested	-1	1
Anaerococcus obesiensis	Vanco	IniMTT			0	No change	Identical Values
Anaerococcus obesiensis	Vanco	EndMTT			0	No change	Identical Values
Anaerococcus obesiensis	Vanco	FollUp	0	0.179712	0.647233	Increased	Tested	-1	1
Anaerococcus obesiensis	IniMTT	EndMTT			0	No change	Identical Values
Anaerococcus obesiensis	IniMTT	FollUp	0	0.179712	0.647233	Increased	Tested	-1	1
Anaerococcus obesiensis	EndMTT	FollUp	0	0.179712	0.647233	Increased	Tested	-1	1
Anaerococcus_u_s	Baseline	Vanco			0	No change	Identical Values
Anaerococcus_u_s	Baseline	IniMTT			0	No change	Identical Values
Anaerococcus_u_s	Baseline	EndMTT	0	0.157299	0.344939	Increased	Tested	-1	1
Anaerococcus_u_s	Baseline	FollUp	0	0.157299	0.659844	Increased	Tested	-1	1
Anaerococcus_u_s	Vanco	IniMTT			0	No change	Identical Values
Anaerococcus_u_s	Vanco	EndMTT	0	0.157299	0.344939	Increased	Tested	-1	1
Anaerococcus_u_s	Vanco	FollUp	0	0.157299	0.659844	Increased	Tested	-1	1
Anaerococcus_u_s	IniMTT	EndMTT	0	0.157299	0.344939	Increased	Tested	-1	1
Anaerococcus_u_s	IniMTT	FollUp	0	0.157299	0.659844	Increased	Tested	-1	1
Anaerococcus_u_s	EndMTT	FollUp	2	0.59298	0.315995	Increased	Tested	-0.333333	0.333333
Anaerofilum_u_s	Baseline	Vanco	1	0.0782482	4.58395	Decreased	Tested	0.866667	0.866667
Anaerofilum_u_s	Baseline	IniMTT	0	0.0678892	4.222	Decreased	Tested	1	1
Anaerofilum_u_s	Baseline	EndMTT	1.5	0.197466	2.4354	Increased	Tested	-0.7	0.7
Anaerofilum_u_s	Baseline	FollUp	0	0.179712	3.69484	Decreased	Tested	1	1
Anaerofilum_u_s	Vanco	IniMTT	3.5	0.577469	0.346081	Increased	Tested	-0.3	0.3
Anaerofilum_u_s	Vanco	EndMTT	0	0.0655997	6.71169	Increased	Tested	-1	1
Anaerofilum_u_s	Vanco	FollUp	1	0.0768812	0.850135	Increased	Tested	-0.866667	0.866667
Anaerofilum_u_s	IniMTT	EndMTT	0	0.0678892	6.38771	Increased	Tested	-1	1
Anaerofilum_u_s	IniMTT	FollUp	0	0.179712	0.505805	Increased	Tested	-1	1
Anaerofilum_u_s	EndMTT	FollUp	1.5	0.197466	6.28326	Decreased	Tested	0.7	0.7
Anaerofustis stercorihominis	Baseline	Vanco	2	0.59298	1.50976	Increased	Tested	-0.333333	0.333333
Anaerofustis stercorihominis	Baseline	IniMTT	1	0.654721	0.332749	Increased	Tested	-0.333333	0.333333
Anaerofustis stercorihominis	Baseline	EndMTT	0	0.179712	1.14274	Decreased	Tested	1	1
Anaerofustis stercorihominis	Baseline	FollUp	0	0.179712	0.5443	Decreased	Tested	1	1
Anaerofustis stercorihominis	Vanco	IniMTT	2	0.59298	1.19505	Decreased	Tested	0.333333	0.333333
Anaerofustis stercorihominis	Vanco	EndMTT	2	0.59298	2.69316	Decreased	Tested	0.333333	0.333333
Anaerofustis stercorihominis	Vanco	FollUp	2	0.59298	2.08554	Decreased	Tested	0.333333	0.333333
Anaerofustis stercorihominis	IniMTT	EndMTT	0	0.317311	1.48042	Decreased	Tested	1	1
Anaerofustis stercorihominis	IniMTT	FollUp	0	0.317311	0.879977	Decreased	Tested	1	1
Anaerofustis stercorihominis	EndMTT	FollUp	0	0.317311	0.591681	Increased	Tested	-1	1
Anaeromassilibacillus_u_s	Baseline	Vanco	0	0.0431144	18.3117	Decreased	Tested	1	1
Anaeromassilibacillus_u_s	Baseline	IniMTT	3	0.15625	18.3755	Decreased	Tested	0.714286	0.714286
Anaeromassilibacillus_u_s	Baseline	EndMTT	9	0.84375	1.92176	Decreased	Tested	-0.142857	0.142857
Anaeromassilibacillus_u_s	Baseline	FollUp	10	1	4.87988	Decreased	Tested	0.047619	0.047619
Anaeromassilibacillus_u_s	Vanco	IniMTT	10	1	0.0538799	Decreased	Tested	-0.047619	0.047619
Anaeromassilibacillus_u_s	Vanco	EndMTT	4	0.21875	13.8532	Increased	Tested	-0.619048	0.619048
Anaeromassilibacillus_u_s	Vanco	FollUp	2	0.09375	11.3529	Increased	Tested	-0.809524	0.809524
Anaeromassilibacillus_u_s	IniMTT	EndMTT	1	0.0625	13.8996	Increased	Tested	-0.904762	0.904762
Anaeromassilibacillus_u_s	IniMTT	FollUp	4	0.21875	11.4007	Increased	Tested	-0.619048	0.619048
Anaeromassilibacillus_u_s	EndMTT	FollUp	6	0.68583	2.90235	Decreased	Tested	0.2	0.2
Pseudoruminococcus massiliensis	Baseline	Vanco	0	0.317311	1.53026	Decreased	Tested	1	1
Pseudoruminococcus massiliensis	Baseline	IniMTT	1	0.654721	1.18005	Decreased	Tested	0.333333	0.333333
Pseudoruminococcus massiliensis	Baseline	EndMTT	5	0.500184	0.976062	Increased	Tested	-0.333333	0.333333
Pseudoruminococcus massiliensis	Baseline	FollUp	4	0.715001	0.596604	Increased	Tested	-0.2	0.2
Pseudoruminococcus massiliensis	Vanco	IniMTT	0	0.157299	0.344939	Increased	Tested	-1	1
Pseudoruminococcus massiliensis	Vanco	EndMTT	0	0.0421682	2.46855	Increased	Tested	-1	1
Pseudoruminococcus massiliensis	Vanco	FollUp	0	0.0655997	2.09481	Increased	Tested	-1	1
Pseudoruminococcus massiliensis	IniMTT	EndMTT	0	0.0431144	2.13096	Increased	Tested	-1	1
Pseudoruminococcus massiliensis	IniMTT	FollUp	2	0.138011	1.75593	Increased	Tested	-0.733333	0.733333
Pseudoruminococcus massiliensis	EndMTT	FollUp	5.5	0.587937	0.383198	Decreased	Tested	0.266667	0.266667
Anaerostipes_u_s	Baseline	Vanco	0	0.179712	13.7916	Decreased	Tested	1	1
Anaerostipes_u_s	Baseline	IniMTT	0	0.179712	5.19915	Decreased	Tested	1	1
Anaerostipes_u_s	Baseline	EndMTT	1	0.285049	4.04366	Decreased	Tested	0.666667	0.666667
Anaerostipes_u_s	Baseline	FollUp	0	0.179712	10.937	Decreased	Tested	1	1
Anaerostipes_u_s	Vanco	IniMTT	0	0.317311	7.55102	Increased	Tested	-1	1
Anaerostipes_u_s	Vanco	EndMTT	0	0.179712	8.56646	Increased	Tested	-1	1
Anaerostipes_u_s	Vanco	FollUp	0	0.317311	2.50858	Increased	Tested	-1	1
Anaerostipes_u_s	IniMTT	EndMTT	0	0.179712	1.09838	Increased	Tested	-1	1
Anaerostipes_u_s	IniMTT	FollUp	0	0.317311	5.45429	Decreased	Tested	1	1
Anaerostipes_u_s	EndMTT	FollUp	0	0.179712	6.62545	Decreased	Tested	1	1
Anaerostipes caccae	Baseline	Vanco	1	0.654721	9.91065	Decreased	Tested	0.333333	0.333333
Anaerostipes caccae	Baseline	IniMTT	0	0.317311	11.6799	Decreased	Tested	1	1
Anaerostipes caccae	Baseline	EndMTT	0	0.317311	3.00371	Decreased	Tested	1	1
Anaerostipes caccae	Baseline	FollUp	0	0.317311	8.92948	Decreased	Tested	1	1
Anaerostipes caccae	Vanco	IniMTT	0	0.317311	1.60971	Decreased	Tested	1	1
Anaerostipes caccae	Vanco	EndMTT	1	0.654721	6.28414	Increased	Tested	-0.333333	0.333333
Anaerostipes caccae	Vanco	FollUp	1	0.654721	0.892698	Increased	Tested	-0.333333	0.333333
Anaerostipes caccae	IniMTT	EndMTT	0	0.317311	7.7688	Increased	Tested	-1	1
Anaerostipes caccae	IniMTT	FollUp	0	0.317311	2.46277	Increased	Tested	-1	1
Anaerostipes caccae	EndMTT	FollUp	0	0.317311	5.75296	Decreased	Tested	1	1
Anaerostipes hadrus	Baseline	Vanco	0	0.03125	38.8102	Decreased	Tested	1	1
Anaerostipes hadrus	Baseline	IniMTT	7	0.5625	18.7086	Decreased	Tested	0.333333	0.333333
Anaerostipes hadrus	Baseline	EndMTT	1	0.0625	31.1741	Decreased	Tested	0.904762	0.904762
Anaerostipes hadrus	Baseline	FollUp	6	0.4375	17.398	Decreased	Tested	0.428571	0.428571
Anaerostipes hadrus	Vanco	IniMTT	8	0.6875	14.4814	Increased	Tested	-0.238095	0.238095
Anaerostipes hadrus	Vanco	EndMTT	7	0.892738	5.50114	Increased	Tested	0.0666667	0.0666667
Anaerostipes hadrus	Vanco	FollUp	4	0.345231	15.4255	Increased	Tested	-0.466667	0.466667
Anaerostipes hadrus	IniMTT	EndMTT	9	0.84375	10.5009	Decreased	Tested	0.142857	0.142857
Anaerostipes hadrus	IniMTT	FollUp	10	1	1.10402	Increased	Tested	-0.047619	0.047619
Anaerostipes hadrus	EndMTT	FollUp	5	0.500184	10.5021	Increased	Tested	-0.333333	0.333333
Anaerotignum faecicola	Baseline	Vanco	0	0.179712	8.5748	Decreased	Tested	1	1
Anaerotignum faecicola	Baseline	IniMTT	0	0.179712	8.5748	Decreased	Tested	1	1
Anaerotignum faecicola	Baseline	EndMTT	0	0.179712	8.5748	Decreased	Tested	1	1
Anaerotignum faecicola	Baseline	FollUp	0	0.179712	8.5748	Decreased	Tested	1	1
Anaerotignum faecicola	Vanco	IniMTT			0	No change	Identical Values
Anaerotignum faecicola	Vanco	EndMTT			0	No change	Identical Values
Anaerotignum faecicola	Vanco	FollUp			0	No change	Identical Values
Anaerotignum faecicola	IniMTT	EndMTT			0	No change	Identical Values
Anaerotignum faecicola	IniMTT	FollUp			0	No change	Identical Values
Anaerotignum faecicola	EndMTT	FollUp			0	No change	Identical Values
Anaerotignum lactatifermentans	Baseline	Vanco	1	0.285049	8.95056	Decreased	Tested	0.666667	0.666667
Anaerotignum lactatifermentans	Baseline	IniMTT	5	1	2.04694	Increased	Tested	0	0
Anaerotignum lactatifermentans	Baseline	EndMTT	6	0.4375	5.0636	Decreased	Tested	0.428571	0.428571
Anaerotignum lactatifermentans	Baseline	FollUp	4	0.345231	7.98631	Decreased	Tested	0.466667	0.466667
Anaerotignum lactatifermentans	Vanco	IniMTT	1	0.285049	10.094	Increased	Tested	-0.666667	0.666667
Anaerotignum lactatifermentans	Vanco	EndMTT	5	0.3125	3.56763	Increased	Tested	-0.52381	0.52381
Anaerotignum lactatifermentans	Vanco	FollUp	5	0.500184	0.885038	Increased	Tested	-0.333333	0.333333
Anaerotignum lactatifermentans	IniMTT	EndMTT	10	1	7.25913	Decreased	Tested	0.047619	0.047619
Anaerotignum lactatifermentans	IniMTT	FollUp	6	0.68583	10.2429	Decreased	Tested	0.2	0.2
Anaerotignum lactatifermentans	EndMTT	FollUp	4	0.345231	2.78184	Decreased	Tested	0.466667	0.466667
Anaerotruncus colihominis	Baseline	Vanco	0	0.03125	11.771	Decreased	Tested	1	1
Anaerotruncus colihominis	Baseline	IniMTT	10	1	4.29901	Decreased	Tested	0.047619	0.047619
Anaerotruncus colihominis	Baseline	EndMTT	8	0.6875	3.40496	Increased	Tested	-0.238095	0.238095
Anaerotruncus colihominis	Baseline	FollUp	9	0.84375	0.211368	Decreased	Tested	0.142857	0.142857
Anaerotruncus colihominis	Vanco	IniMTT	4	0.21875	6.68506	Increased	Tested	-0.619048	0.619048
Anaerotruncus colihominis	Vanco	EndMTT	0	0.0431144	13.5777	Increased	Tested	-1	1
Anaerotruncus colihominis	Vanco	FollUp	0	0.0678892	10.3422	Increased	Tested	-1	1
Anaerotruncus colihominis	IniMTT	EndMTT	6	0.4375	7.38642	Increased	Tested	-0.428571	0.428571
Anaerotruncus colihominis	IniMTT	FollUp	9	0.84375	3.91915	Increased	Tested	-0.142857	0.142857
Anaerotruncus colihominis	EndMTT	FollUp	2	0.138011	3.7438	Decreased	Tested	0.733333	0.733333
Anaerotruncus massiliensis	Baseline	Vanco	0	0.108809	13.9853	Decreased	Tested	1	1
Anaerotruncus massiliensis	Baseline	IniMTT	0	0.108809	14.3813	Decreased	Tested	1	1
Anaerotruncus massiliensis	Baseline	EndMTT	4	0.715001	10.1239	Decreased	Tested	0.2	0.2
Anaerotruncus massiliensis	Baseline	FollUp	1	0.144127	14.6431	Decreased	Tested	0.8	0.8
Anaerotruncus massiliensis	Vanco	IniMTT	1	0.654721	0.347346	Decreased	Tested	0.333333	0.333333
Anaerotruncus massiliensis	Vanco	EndMTT	2	0.59298	3.38764	Increased	Tested	-0.333333	0.333333
Anaerotruncus massiliensis	Vanco	FollUp	3	1	0.577085	Decreased	Tested	0	0
Anaerotruncus massiliensis	IniMTT	EndMTT	0	0.10247	3.72205	Increased	Tested	-1	1
Anaerotruncus massiliensis	IniMTT	FollUp	1	0.654721	0.228943	Decreased	Tested	0.333333	0.333333
Anaerotruncus massiliensis	EndMTT	FollUp	2	0.59298	4.10374	Decreased	Tested	0.333333	0.333333
Anaerotruncus rubiinfantis	Baseline	Vanco	0	0.179712	3.11897	Decreased	Tested	1	1
Anaerotruncus rubiinfantis	Baseline	IniMTT	1	0.654721	0.532144	Decreased	Tested	0.333333	0.333333
Anaerotruncus rubiinfantis	Baseline	EndMTT	2	0.59298	0.402303	Increased	Tested	-0.333333	0.333333
Anaerotruncus rubiinfantis	Baseline	FollUp	1	0.285049	2.13983	Decreased	Tested	0.666667	0.666667
Anaerotruncus rubiinfantis	Vanco	IniMTT	0	0.317311	2.50858	Increased	Tested	-1	1
Anaerotruncus rubiinfantis	Vanco	EndMTT	0	0.179712	3.41477	Increased	Tested	-1	1
Anaerotruncus rubiinfantis	Vanco	FollUp	0	0.157299	0.949528	Increased	Tested	-1	1
Anaerotruncus rubiinfantis	IniMTT	EndMTT	0	0.179712	0.9295	Increased	Tested	-1	1
Anaerotruncus rubiinfantis	IniMTT	FollUp	1	0.654721	1.59917	Decreased	Tested	0.333333	0.333333
Anaerotruncus rubiinfantis	EndMTT	FollUp	2	0.59298	2.5524	Decreased	Tested	0.333333	0.333333
Anaerotruncus_u_s	Baseline	Vanco	0	0.0678892	11.4474	Decreased	Tested	1	1
Anaerotruncus_u_s	Baseline	IniMTT	0	0.0678892	12.9267	Decreased	Tested	1	1
Anaerotruncus_u_s	Baseline	EndMTT	4	0.715001	8.01546	Decreased	Tested	0.2	0.2
Anaerotruncus_u_s	Baseline	FollUp	2	0.273322	13.4958	Decreased	Tested	0.6	0.6
Anaerotruncus_u_s	Vanco	IniMTT	1	0.654721	1.32733	Decreased	Tested	0.333333	0.333333
Anaerotruncus_u_s	Vanco	EndMTT	2	0.59298	3.07943	Increased	Tested	-0.333333	0.333333
Anaerotruncus_u_s	Vanco	FollUp	3	1	1.83801	Decreased	Tested	0	0
Anaerotruncus_u_s	IniMTT	EndMTT	0	0.108809	4.34903	Increased	Tested	-1	1
Anaerotruncus_u_s	IniMTT	FollUp	3	1	0.503989	Decreased	Tested	0	0
Anaerotruncus_u_s	EndMTT	FollUp	1	0.654721	5.07368	Decreased	Tested	0.333333	0.333333
Angelakisella massiliensis	Baseline	Vanco	0	0.0678892	3.31763	Decreased	Tested	1	1
Angelakisella massiliensis	Baseline	IniMTT	5.5	0.587937	2.1415	Decreased	Tested	0.266667	0.266667
Angelakisella massiliensis	Baseline	EndMTT	5	0.500184	0.497952	Increased	Tested	-0.333333	0.333333
Angelakisella massiliensis	Baseline	FollUp	4	0.712702	1.80814	Decreased	Tested	-0.2	0.2
Angelakisella massiliensis	Vanco	IniMTT	2.5	0.157299	1.13836	Increased	Tested	-0.666667	0.666667
Angelakisella massiliensis	Vanco	EndMTT	0	0.03125	3.69306	Increased	Tested	-1	1
Angelakisella massiliensis	Vanco	FollUp	0	0.03125	1.46102	Increased	Tested	-1	1
Angelakisella massiliensis	IniMTT	EndMTT	0	0.0678892	2.58411	Increased	Tested	-1	1
Angelakisella massiliensis	IniMTT	FollUp	4	0.715001	0.326369	Increased	Tested	-0.2	0.2
Angelakisella massiliensis	EndMTT	FollUp	1	0.0625	2.31763	Decreased	Tested	0.904762	0.904762
Lancefieldella parvula	Baseline	Vanco	1.5	0.197466	2.13095	Increased	Tested	-0.7	0.7
Lancefieldella parvula	Baseline	IniMTT	0	0.317311	0.172767	Decreased	Tested	1	1
Lancefieldella parvula	Baseline	EndMTT	0	0.317311	0.330492	Increased	Tested	-1	1
Lancefieldella parvula	Baseline	FollUp	0	0.317311	0.172767	Increased	Tested	-1	1
Lancefieldella parvula	Vanco	IniMTT	0	0.108809	2.35387	Decreased	Tested	1	1
Lancefieldella parvula	Vanco	EndMTT	1.5	0.414216	1.83966	Decreased	Tested	0.5	0.5
Lancefieldella parvula	Vanco	FollUp	1.5	0.197466	2.00081	Decreased	Tested	0.7	0.7
Lancefieldella parvula	IniMTT	EndMTT	0	0.179712	0.502391	Increased	Tested	-1	1
Lancefieldella parvula	IniMTT	FollUp	0	0.157299	0.344939	Increased	Tested	-1	1
Lancefieldella parvula	EndMTT	FollUp	1	0.654721	0.158247	Decreased	Tested	0.333333	0.333333
Lancefieldella rimae	Baseline	Vanco	0	0.108809	2.29974	Increased	Tested	-1	1
Lancefieldella rimae	Baseline	IniMTT			0	No change	Identical Values
Lancefieldella rimae	Baseline	EndMTT	0	0.157299	0.344939	Increased	Tested	-1	1
Lancefieldella rimae	Baseline	FollUp			0	No change	Identical Values
Lancefieldella rimae	Vanco	IniMTT	0	0.108809	2.35387	Decreased	Tested	1	1
Lancefieldella rimae	Vanco	EndMTT	1	0.285049	2.00081	Decreased	Tested	0.666667	0.666667
Lancefieldella rimae	Vanco	FollUp	0	0.108809	2.35387	Decreased	Tested	1	1
Lancefieldella rimae	IniMTT	EndMTT	0	0.157299	0.344939	Increased	Tested	-1	1
Lancefieldella rimae	IniMTT	FollUp			0	No change	Identical Values
Lancefieldella rimae	EndMTT	FollUp	0	0.157299	0.346133	Decreased	Tested	1	1
Atopobium_u_s	Baseline	Vanco	2.5	0.357273	2.0276	Increased	Tested	-0.5	0.5
Atopobium_u_s	Baseline	IniMTT	0	0.157299	0.346133	Decreased	Tested	1	1
Atopobium_u_s	Baseline	EndMTT	0	0.179712	0.331064	Increased	Tested	-1	1
Atopobium_u_s	Baseline	FollUp	0	0.317311	0.173066	Decreased	Tested	1	1
Atopobium_u_s	Vanco	IniMTT	0	0.108809	2.42286	Decreased	Tested	1	1
Atopobium_u_s	Vanco	EndMTT	1.5	0.414216	1.73165	Decreased	Tested	0.5	0.5
Atopobium_u_s	Vanco	FollUp	1.5	0.197466	2.24622	Decreased	Tested	0.7	0.7
Atopobium_u_s	IniMTT	EndMTT	0	0.10247	0.674861	Increased	Tested	-1	1
Atopobium_u_s	IniMTT	FollUp	0	0.317311	0.17247	Increased	Tested	-1	1
Atopobium_u_s	EndMTT	FollUp	0	0.179712	0.505805	Decreased	Tested	1	1
Bacteroides_u_s	Baseline	Vanco	2	0.09375	60.9602	Decreased	Tested	0.809524	0.809524
Bacteroides_u_s	Baseline	IniMTT	10	1	5.20565	Decreased	Tested	0.047619	0.047619
Bacteroides_u_s	Baseline	EndMTT	9	0.84375	17.805	Decreased	Tested	0.142857	0.142857
Bacteroides_u_s	Baseline	FollUp	7	0.5625	10.767	Increased	Tested	-0.333333	0.333333
Bacteroides_u_s	Vanco	IniMTT	4	0.21875	34.6387	Increased	Tested	-0.619048	0.619048
Bacteroides_u_s	Vanco	EndMTT	3	0.224916	26.8111	Increased	Tested	-0.6	0.6
Bacteroides_u_s	Vanco	FollUp	0	0.03125	44.5621	Increased	Tested	-1	1
Bacteroides_u_s	IniMTT	EndMTT	8	0.6875	11.9759	Decreased	Tested	0.238095	0.238095
Bacteroides_u_s	IniMTT	FollUp	5	0.3125	15.1823	Increased	Tested	-0.52381	0.52381
Bacteroides_u_s	EndMTT	FollUp	7	0.5625	24.2536	Increased	Tested	-0.333333	0.333333
Bacteroides acidifaciens	Baseline	Vanco	0	0.179712	0.91447	Decreased	Tested	1	1
Bacteroides acidifaciens	Baseline	IniMTT	2	0.59298	0.581531	Decreased	Tested	0.333333	0.333333
Bacteroides acidifaciens	Baseline	EndMTT	1.5	0.414216	0.740423	Decreased	Tested	0.5	0.5
Bacteroides acidifaciens	Baseline	FollUp	1.5	0.414216	0.566376	Decreased	Tested	0.5	0.5
Bacteroides acidifaciens	Vanco	IniMTT	0	0.317311	0.329922	Increased	Tested	-1	1
Bacteroides acidifaciens	Vanco	EndMTT	0	0.317311	0.17247	Increased	Tested	-1	1
Bacteroides acidifaciens	Vanco	FollUp	0	0.157299	0.344939	Increased	Tested	-1	1
Bacteroides acidifaciens	IniMTT	EndMTT	0	0.317311	0.157974	Decreased	Tested	1	1
Bacteroides acidifaciens	IniMTT	FollUp	1	0.654721	0.0150669	Increased	Tested	-0.333333	0.333333
Bacteroides acidifaciens	EndMTT	FollUp	0	0.317311	0.172767	Increased	Tested	-1	1
Bacteroides caccae	Baseline	Vanco	0	0.0678892	20.7408	Decreased	Tested	1	1
Bacteroides caccae	Baseline	IniMTT	5	0.3125	14.1765	Decreased	Tested	0.52381	0.52381
Bacteroides caccae	Baseline	EndMTT	6	0.68583	7.03283	Decreased	Tested	0.2	0.2
Bacteroides caccae	Baseline	FollUp	9	0.84375	1.37647	Decreased	Tested	0.142857	0.142857
Bacteroides caccae	Vanco	IniMTT	9	0.84375	5.43672	Increased	Tested	-0.142857	0.142857
Bacteroides caccae	Vanco	EndMTT	1	0.144127	11.3532	Increased	Tested	-0.8	0.8
Bacteroides caccae	Vanco	FollUp	0	0.0431144	16.0379	Increased	Tested	-1	1
Bacteroides caccae	IniMTT	EndMTT	10	1	6.25665	Increased	Tested	-0.047619	0.047619
Bacteroides caccae	IniMTT	FollUp	8	0.6875	11.2107	Increased	Tested	-0.238095	0.238095
Bacteroides caccae	EndMTT	FollUp	5	0.498225	5.2847	Increased	Tested	-0.333333	0.333333
Bacteroides caecimuris	Baseline	Vanco	0	0.317311	1.07507	Decreased	Tested	1	1
Bacteroides caecimuris	Baseline	IniMTT	0	0.317311	1.07507	Decreased	Tested	1	1
Bacteroides caecimuris	Baseline	EndMTT	1	0.654721	0.741602	Decreased	Tested	0.333333	0.333333
Bacteroides caecimuris	Baseline	FollUp	1	0.654721	0.459658	Decreased	Tested	0.333333	0.333333
Bacteroides caecimuris	Vanco	IniMTT			0	No change	Identical Values
Bacteroides caecimuris	Vanco	EndMTT	0	0.317311	0.329922	Increased	Tested	-1	1
Bacteroides caecimuris	Vanco	FollUp	0	0.317311	0.608867	Increased	Tested	-1	1
Bacteroides caecimuris	IniMTT	EndMTT	0	0.317311	0.329922	Increased	Tested	-1	1
Bacteroides caecimuris	IniMTT	FollUp	0	0.317311	0.608867	Increased	Tested	-1	1
Bacteroides caecimuris	EndMTT	FollUp	0	0.317311	0.279868	Increased	Tested	-1	1
Bacteroides cellulosilyticus	Baseline	Vanco	0	0.108809	17.5836	Decreased	Tested	1	1
Bacteroides cellulosilyticus	Baseline	IniMTT	0	0.108809	13.2658	Decreased	Tested	1	1
Bacteroides cellulosilyticus	Baseline	EndMTT	1	0.285049	4.96854	Decreased	Tested	0.666667	0.666667
Bacteroides cellulosilyticus	Baseline	FollUp	0	0.108809	4.54481	Decreased	Tested	1	1
Bacteroides cellulosilyticus	Vanco	IniMTT	1	0.654721	3.67216	Increased	Tested	-0.333333	0.333333
Bacteroides cellulosilyticus	Vanco	EndMTT	0	0.179712	10.7286	Increased	Tested	-1	1
Bacteroides cellulosilyticus	Vanco	FollUp	0	0.108809	11.089	Increased	Tested	-1	1
Bacteroides cellulosilyticus	IniMTT	EndMTT	0	0.179712	7.32546	Increased	Tested	-1	1
Bacteroides cellulosilyticus	IniMTT	FollUp	0	0.108809	7.69956	Increased	Tested	-1	1
Bacteroides cellulosilyticus	EndMTT	FollUp	3	1	0.403672	Increased	Tested	0	0
Bacteroides clarus	Baseline	Vanco	0	0.317311	0.612597	Decreased	Tested	1	1
Bacteroides clarus	Baseline	IniMTT	0	0.317311	0.134924	Decreased	Tested	1	1
Bacteroides clarus	Baseline	EndMTT	0	0.317311	0.439071	Decreased	Tested	1	1
Bacteroides clarus	Baseline	FollUp	1	0.654721	0.280654	Decreased	Tested	0.333333	0.333333
Bacteroides clarus	Vanco	IniMTT	0	0.317311	0.474764	Increased	Tested	-1	1
Bacteroides clarus	Vanco	EndMTT	0	0.317311	0.17247	Increased	Tested	-1	1
Bacteroides clarus	Vanco	FollUp	0	0.317311	0.329922	Increased	Tested	-1	1
Bacteroides clarus	IniMTT	EndMTT	0	0.317311	0.303736	Decreased	Tested	1	1
Bacteroides clarus	IniMTT	FollUp	1	0.654721	0.145533	Decreased	Tested	0.333333	0.333333
Bacteroides clarus	EndMTT	FollUp	1	0.654721	0.157724	Increased	Tested	-0.333333	0.333333
Phocaeicola coprocola	Baseline	Vanco	0	0.108809	3.98575	Decreased	Tested	1	1
Phocaeicola coprocola	Baseline	IniMTT	0	0.108809	3.31272	Decreased	Tested	1	1
Phocaeicola coprocola	Baseline	EndMTT	0	0.179712	3.29961	Decreased	Tested	1	1
Phocaeicola coprocola	Baseline	FollUp	0	0.108809	2.99393	Decreased	Tested	1	1
Phocaeicola coprocola	Vanco	IniMTT	0	0.179712	0.647233	Increased	Tested	-1	1
Phocaeicola coprocola	Vanco	EndMTT	0	0.157299	0.659844	Increased	Tested	-1	1
Phocaeicola coprocola	Vanco	FollUp	0	0.10247	0.953806	Increased	Tested	-1	1
Phocaeicola coprocola	IniMTT	EndMTT	1	0.654721	0.0126924	Increased	Tested	-0.333333	0.333333
Phocaeicola coprocola	IniMTT	FollUp	1	0.654721	0.30857	Increased	Tested	-0.333333	0.333333
Phocaeicola coprocola	EndMTT	FollUp	3	1	0.295915	Increased	Tested	0	0
Phocaeicola dorei	Baseline	Vanco	5	0.3125	19.5884	Decreased	Tested	0.52381	0.52381
Phocaeicola dorei	Baseline	IniMTT	7	0.5625	17.0643	Increased	Tested	-0.333333	0.333333
Phocaeicola dorei	Baseline	EndMTT	7	0.5625	15.384	Increased	Tested	-0.333333	0.333333
Phocaeicola dorei	Baseline	FollUp	1	0.0625	31.0836	Increased	Tested	-0.904762	0.904762
Phocaeicola dorei	Vanco	IniMTT	3	0.15625	30.649	Increased	Tested	-0.714286	0.714286
Phocaeicola dorei	Vanco	EndMTT	3	0.15625	29.2439	Increased	Tested	-0.714286	0.714286
Phocaeicola dorei	Vanco	FollUp	0	0.03125	42.372	Increased	Tested	-1	1
Phocaeicola dorei	IniMTT	EndMTT	7	0.892738	2.02608	Decreased	Tested	0.0666667	0.0666667
Phocaeicola dorei	IniMTT	FollUp	7	0.5625	16.9038	Increased	Tested	-0.333333	0.333333
Phocaeicola dorei	EndMTT	FollUp	7	0.5625	18.5539	Increased	Tested	-0.333333	0.333333
Bacteroides eggerthii	Baseline	Vanco	0	0.179712	2.58736	Decreased	Tested	1	1
Bacteroides eggerthii	Baseline	IniMTT	1	0.654721	0.52333	Decreased	Tested	0.333333	0.333333
Bacteroides eggerthii	Baseline	EndMTT	1	0.654721	1.4962	Decreased	Tested	0.333333	0.333333
Bacteroides eggerthii	Baseline	FollUp	3	1	1.65773	Decreased	Tested	0	0
Bacteroides eggerthii	Vanco	IniMTT	0	0.179712	2.01197	Increased	Tested	-1	1
Bacteroides eggerthii	Vanco	EndMTT	0	0.179712	1.06364	Increased	Tested	-1	1
Bacteroides eggerthii	Vanco	FollUp	0	0.179712	0.906183	Increased	Tested	-1	1
Bacteroides eggerthii	IniMTT	EndMTT	0	0.179712	0.96781	Decreased	Tested	1	1
Bacteroides eggerthii	IniMTT	FollUp	1	0.285049	1.1285	Decreased	Tested	0.666667	0.666667
Bacteroides eggerthii	EndMTT	FollUp	1	0.654721	0.159145	Decreased	Tested	0.333333	0.333333
Bacteroides faecis	Baseline	Vanco	0	0.108809	17.2795	Decreased	Tested	1	1
Bacteroides faecis	Baseline	IniMTT	4	0.715001	2.40807	Decreased	Tested	0.2	0.2
Bacteroides faecis	Baseline	EndMTT	1	0.285049	8.55523	Decreased	Tested	0.666667	0.666667
Bacteroides faecis	Baseline	FollUp	1	0.285049	8.19544	Decreased	Tested	0.666667	0.666667
Bacteroides faecis	Vanco	IniMTT	0	0.108809	12.6803	Increased	Tested	-1	1
Bacteroides faecis	Vanco	EndMTT	0	0.317311	7.43887	Increased	Tested	-1	1
Bacteroides faecis	Vanco	FollUp	0	0.179712	7.74566	Increased	Tested	-1	1
Bacteroides faecis	IniMTT	EndMTT	0	0.108809	6.00262	Decreased	Tested	1	1
Bacteroides faecis	IniMTT	FollUp	1.5	0.197466	5.65129	Decreased	Tested	0.7	0.7
Bacteroides faecis	EndMTT	FollUp	0	0.179712	0.33144	Increased	Tested	-1	1
Bacteroides finegoldii	Baseline	Vanco	5	1	0.279626	Decreased	Tested	0	0
Bacteroides finegoldii	Baseline	IniMTT	3	1	2.36921	Increased	Tested	0	0
Bacteroides finegoldii	Baseline	EndMTT	7	0.892738	0.11006	Decreased	Tested	-0.0666667	0.0666667
Bacteroides finegoldii	Baseline	FollUp	5	0.500184	8.44568	Increased	Tested	-0.333333	0.333333
Bacteroides finegoldii	Vanco	IniMTT	3	1	2.64145	Increased	Tested	0	0
Bacteroides finegoldii	Vanco	EndMTT	5	1	0.169093	Increased	Tested	0	0
Bacteroides finegoldii	Vanco	FollUp	3	0.224916	8.70098	Increased	Tested	-0.6	0.6
Bacteroides finegoldii	IniMTT	EndMTT	3	1	2.53944	Decreased	Tested	0	0
Bacteroides finegoldii	IniMTT	FollUp	4	0.715001	6.22393	Increased	Tested	-0.2	0.2
Bacteroides finegoldii	EndMTT	FollUp	1	0.285049	8.54634	Increased	Tested	-0.666667	0.666667
Bacteroides fragilis	Baseline	Vanco	0	0.03125	41.8847	Decreased	Tested	1	1
Bacteroides fragilis	Baseline	IniMTT	6	0.4375	17.5801	Decreased	Tested	0.428571	0.428571
Bacteroides fragilis	Baseline	EndMTT	6	0.4375	12.4532	Increased	Tested	-0.428571	0.428571
Bacteroides fragilis	Baseline	FollUp	8	0.6875	1.41429	Increased	Tested	-0.238095	0.238095
Bacteroides fragilis	Vanco	IniMTT	3	0.224916	17.1298	Increased	Tested	-0.6	0.6
Bacteroides fragilis	Vanco	EndMTT	1	0.0625	38.2972	Increased	Tested	-0.904762	0.904762
Bacteroides fragilis	Vanco	FollUp	0	0.0431144	30.517	Increased	Tested	-1	1
Bacteroides fragilis	IniMTT	EndMTT	2	0.138011	25.5429	Increased	Tested	-0.733333	0.733333
Bacteroides fragilis	IniMTT	FollUp	9	0.84375	16.1544	Increased	Tested	-0.142857	0.142857
Bacteroides fragilis	EndMTT	FollUp	4	0.21875	12.6092	Decreased	Tested	0.619048	0.619048
Bacteroides gallinarum	Baseline	Vanco			0	No change	Identical Values
Bacteroides gallinarum	Baseline	IniMTT	0	0.157299	0.344939	Increased	Tested	-1	1
Bacteroides gallinarum	Baseline	EndMTT			0	No change	Identical Values
Bacteroides gallinarum	Baseline	FollUp	0	0.317311	0.17247	Increased	Tested	-1	1
Bacteroides gallinarum	Vanco	IniMTT	0	0.157299	0.344939	Increased	Tested	-1	1
Bacteroides gallinarum	Vanco	EndMTT			0	No change	Identical Values
Bacteroides gallinarum	Vanco	FollUp	0	0.317311	0.17247	Increased	Tested	-1	1
Bacteroides gallinarum	IniMTT	EndMTT	0	0.157299	0.346133	Decreased	Tested	1	1
Bacteroides gallinarum	IniMTT	FollUp	0	0.317311	0.173066	Decreased	Tested	1	1
Bacteroides gallinarum	EndMTT	FollUp	0	0.317311	0.17247	Increased	Tested	-1	1
Bacteroides intestinalis	Baseline	Vanco	0	0.179712	0.504928	Decreased	Tested	1	1
Bacteroides intestinalis	Baseline	IniMTT	1	0.654721	4.01436	Increased	Tested	-0.333333	0.333333
Bacteroides intestinalis	Baseline	EndMTT	2	0.59298	4.68803	Increased	Tested	-0.333333	0.333333
Bacteroides intestinalis	Baseline	FollUp	4.5	0.853923	6.25999	Increased	Tested	-0.1	0.1
Bacteroides intestinalis	Vanco	IniMTT	0	0.317311	4.49659	Increased	Tested	-1	1
Bacteroides intestinalis	Vanco	EndMTT	0	0.179712	5.16687	Increased	Tested	-1	1
Bacteroides intestinalis	Vanco	FollUp	0	0.179712	6.73093	Increased	Tested	-1	1
Bacteroides intestinalis	IniMTT	EndMTT	0	0.179712	0.701845	Increased	Tested	-1	1
Bacteroides intestinalis	IniMTT	FollUp	2	0.59298	2.33954	Increased	Tested	-0.333333	0.333333
Bacteroides intestinalis	EndMTT	FollUp	1	0.654721	1.64928	Increased	Tested	-0.333333	0.333333
Phocaeicola massiliensis	Baseline	Vanco	0	0.0678892	2.16169	Decreased	Tested	1	1
Phocaeicola massiliensis	Baseline	IniMTT	5	0.500184	5.92412	Increased	Tested	0.333333	0.333333
Phocaeicola massiliensis	Baseline	EndMTT	5	0.500184	5.395	Increased	Tested	0.333333	0.333333
Phocaeicola massiliensis	Baseline	FollUp	6	0.68583	9.96921	Increased	Tested	-0.2	0.2
Phocaeicola massiliensis	Vanco	IniMTT	3	1	7.91472	Increased	Tested	0	0
Phocaeicola massiliensis	Vanco	EndMTT	3	1	7.3968	Increased	Tested	0	0
Phocaeicola massiliensis	Vanco	FollUp	1	0.285049	11.8742	Increased	Tested	-0.666667	0.666667
Phocaeicola massiliensis	IniMTT	EndMTT	0	0.317311	0.56244	Decreased	Tested	1	1
Phocaeicola massiliensis	IniMTT	FollUp	1	0.654721	4.29982	Increased	Tested	-0.333333	0.333333
Phocaeicola massiliensis	EndMTT	FollUp	1	0.654721	4.83506	Increased	Tested	-0.333333	0.333333
Bacteroides nordii	Baseline	Vanco	0	0.179712	7.02723	Decreased	Tested	1	1
Bacteroides nordii	Baseline	IniMTT	0	0.179712	7.21214	Decreased	Tested	1	1
Bacteroides nordii	Baseline	EndMTT	2	0.59298	6.2892	Increased	Tested	-0.333333	0.333333
Bacteroides nordii	Baseline	FollUp	2	0.59298	0.933634	Increased	Tested	-0.333333	0.333333
Bacteroides nordii	Vanco	IniMTT	0	0.317311	0.172767	Decreased	Tested	1	1
Bacteroides nordii	Vanco	EndMTT	0	0.179712	12.4421	Increased	Tested	-1	1
Bacteroides nordii	Vanco	FollUp	0	0.179712	7.43817	Increased	Tested	-1	1
Bacteroides nordii	IniMTT	EndMTT	0	0.179712	12.5931	Increased	Tested	-1	1
Bacteroides nordii	IniMTT	FollUp	0	0.179712	7.59781	Increased	Tested	-1	1
Bacteroides nordii	EndMTT	FollUp	0	0.179712	5.71499	Decreased	Tested	1	1
Bacteroides ovatus	Baseline	Vanco	2	0.09375	26.5215	Decreased	Tested	0.809524	0.809524
Bacteroides ovatus	Baseline	IniMTT	8	0.6875	2.74558	Decreased	Tested	0.238095	0.238095
Bacteroides ovatus	Baseline	EndMTT	6	0.4375	8.51118	Increased	Tested	-0.428571	0.428571
Bacteroides ovatus	Baseline	FollUp	6	0.4375	13.3214	Increased	Tested	-0.428571	0.428571
Bacteroides ovatus	Vanco	IniMTT	5	0.3125	18.792	Increased	Tested	-0.52381	0.52381
Bacteroides ovatus	Vanco	EndMTT	2	0.09375	27.6891	Increased	Tested	-0.809524	0.809524
Bacteroides ovatus	Vanco	FollUp	0	0.03125	31.491	Increased	Tested	-1	1
Bacteroides ovatus	IniMTT	EndMTT	5	0.500184	10.956	Increased	Tested	-0.333333	0.333333
Bacteroides ovatus	IniMTT	FollUp	7	0.5625	15.6376	Increased	Tested	-0.333333	0.333333
Bacteroides ovatus	EndMTT	FollUp	9	0.84375	5.25772	Increased	Tested	-0.142857	0.142857
Clostridiales_u_s	Baseline	Vanco	1	0.0625	52.8381	Decreased	Tested	0.904762	0.904762
Clostridiales_u_s	Baseline	IniMTT	6	0.4375	26.9891	Decreased	Tested	0.428571	0.428571
Clostridiales_u_s	Baseline	EndMTT	0	0.03125	16.1986	Increased	Tested	-1	1
Clostridiales_u_s	Baseline	FollUp	9	0.84375	8.32471	Increased	Tested	-0.142857	0.142857
Clostridiales_u_s	Vanco	IniMTT	8	0.6875	16.9127	Increased	Tested	-0.238095	0.238095
Clostridiales_u_s	Vanco	EndMTT	1	0.0625	45.1698	Increased	Tested	-0.904762	0.904762
Clostridiales_u_s	Vanco	FollUp	1	0.0625	40.0181	Increased	Tested	-0.904762	0.904762
Clostridiales_u_s	IniMTT	EndMTT	1	0.0625	34.0089	Increased	Tested	-0.904762	0.904762
Clostridiales_u_s	IniMTT	FollUp	3	0.15625	27.8085	Increased	Tested	-0.714286	0.714286
Clostridiales_u_s	EndMTT	FollUp	3	0.15625	9.39584	Decreased	Tested	0.714286	0.714286
Phocaeicola plebeius	Baseline	Vanco	0	0.317311	6.25722	Decreased	Tested	1	1
Phocaeicola plebeius	Baseline	IniMTT	0	0.317311	6.25722	Decreased	Tested	1	1
Phocaeicola plebeius	Baseline	EndMTT	0	0.317311	6.25722	Decreased	Tested	1	1
Phocaeicola plebeius	Baseline	FollUp	0	0.317311	1.62917	Decreased	Tested	1	1
Phocaeicola plebeius	Vanco	IniMTT			0	No change	Identical Values
Phocaeicola plebeius	Vanco	EndMTT			0	No change	Identical Values
Phocaeicola plebeius	Vanco	FollUp	0	0.317311	4.35551	Increased	Tested	-1	1
Phocaeicola plebeius	IniMTT	EndMTT			0	No change	Identical Values
Phocaeicola plebeius	IniMTT	FollUp	0	0.317311	4.35551	Increased	Tested	-1	1
Phocaeicola plebeius	EndMTT	FollUp	0	0.317311	4.35551	Increased	Tested	-1	1
Bacteroides rodentium	Baseline	Vanco	0	0.10247	0.679446	Decreased	Tested	1	1
Bacteroides rodentium	Baseline	IniMTT	0	0.179712	0.332164	Decreased	Tested	1	1
Bacteroides rodentium	Baseline	EndMTT	3	1	0.145826	Increased	Tested	0	0
Bacteroides rodentium	Baseline	FollUp	2.5	0.785495	0.173641	Decreased	Tested	0.166667	0.166667
Bacteroides rodentium	Vanco	IniMTT	0	0.157299	0.344939	Increased	Tested	-1	1
Bacteroides rodentium	Vanco	EndMTT	0	0.10247	0.819703	Increased	Tested	-1	1
Bacteroides rodentium	Vanco	FollUp	0	0.179712	0.502391	Increased	Tested	-1	1
Bacteroides rodentium	IniMTT	EndMTT	0	0.317311	0.476407	Increased	Tested	-1	1
Bacteroides rodentium	IniMTT	FollUp	1	0.654721	0.157997	Increased	Tested	-0.333333	0.333333
Bacteroides rodentium	EndMTT	FollUp	2	0.59298	0.319934	Decreased	Tested	0.333333	0.333333
Bacteroides salyersiae	Baseline	Vanco			0	No change	Identical Values
Bacteroides salyersiae	Baseline	IniMTT	0	0.317311	0.17247	Increased	Tested	-1	1
Bacteroides salyersiae	Baseline	EndMTT	0	0.157299	0.344939	Increased	Tested	-1	1
Bacteroides salyersiae	Baseline	FollUp	0	0.179712	0.781336	Increased	Tested	-1	1
Bacteroides salyersiae	Vanco	IniMTT	0	0.317311	0.17247	Increased	Tested	-1	1
Bacteroides salyersiae	Vanco	EndMTT	0	0.157299	0.344939	Increased	Tested	-1	1
Bacteroides salyersiae	Vanco	FollUp	0	0.179712	0.781336	Increased	Tested	-1	1
Bacteroides salyersiae	IniMTT	EndMTT	0	0.317311	0.172767	Increased	Tested	-1	1
Bacteroides salyersiae	IniMTT	FollUp	1.5	0.414216	0.609919	Increased	Tested	-0.5	0.5
Bacteroides salyersiae	EndMTT	FollUp	1	0.654721	0.437908	Increased	Tested	-0.333333	0.333333
Phocaeicola sartorii	Baseline	Vanco	0	0.179712	3.58198	Decreased	Tested	1	1
Phocaeicola sartorii	Baseline	IniMTT	0	0.179712	3.58198	Decreased	Tested	1	1
Phocaeicola sartorii	Baseline	EndMTT	0	0.179712	3.58198	Decreased	Tested	1	1
Phocaeicola sartorii	Baseline	FollUp	0	0.179712	3.58198	Decreased	Tested	1	1
Phocaeicola sartorii	Vanco	IniMTT			0	No change	Identical Values
Phocaeicola sartorii	Vanco	EndMTT			0	No change	Identical Values
Phocaeicola sartorii	Vanco	FollUp			0	No change	Identical Values
Phocaeicola sartorii	IniMTT	EndMTT			0	No change	Identical Values
Phocaeicola sartorii	IniMTT	FollUp			0	No change	Identical Values
Phocaeicola sartorii	EndMTT	FollUp			0	No change	Identical Values
Bacteroides thetaiotaomicron	Baseline	Vanco	1	0.144127	14.7154	Decreased	Tested	0.8	0.8
Bacteroides thetaiotaomicron	Baseline	IniMTT	8.5	0.6875	4.26088	Increased	Tested	-0.190476	0.190476
Bacteroides thetaiotaomicron	Baseline	EndMTT	4.5	0.416366	4.04857	Increased	Tested	-0.4	0.4
Bacteroides thetaiotaomicron	Baseline	FollUp	3	0.224916	6.27827	Increased	Tested	-0.6	0.6
Bacteroides thetaiotaomicron	Vanco	IniMTT	5	0.3125	16.542	Increased	Tested	-0.52381	0.52381
Bacteroides thetaiotaomicron	Vanco	EndMTT	2	0.138011	16.357	Increased	Tested	-0.733333	0.733333
Bacteroides thetaiotaomicron	Vanco	FollUp	0	0.0431144	18.3006	Increased	Tested	-1	1
Bacteroides thetaiotaomicron	IniMTT	EndMTT	4	0.715001	0.221762	Decreased	Tested	0.2	0.2
Bacteroides thetaiotaomicron	IniMTT	FollUp	10	1	2.10718	Increased	Tested	-0.047619	0.047619
Bacteroides thetaiotaomicron	EndMTT	FollUp	10	1	2.32379	Increased	Tested	-0.047619	0.047619
Bacteroides stercorirosoris	Baseline	Vanco	0	0.317311	0.477029	Decreased	Tested	1	1
Bacteroides stercorirosoris	Baseline	IniMTT	1	0.654721	0.130444	Decreased	Tested	0.333333	0.333333
Bacteroides stercorirosoris	Baseline	EndMTT	0	0.317311	0.173292	Increased	Tested	-1	1
Bacteroides stercorirosoris	Baseline	FollUp	1	0.654721	0.185963	Increased	Tested	-0.333333	0.333333
Bacteroides stercorirosoris	Vanco	IniMTT	0	0.157299	0.344939	Increased	Tested	-1	1
Bacteroides stercorirosoris	Vanco	EndMTT	0	0.179712	0.647233	Increased	Tested	-1	1
Bacteroides stercorirosoris	Vanco	FollUp	0	0.157299	0.659844	Increased	Tested	-1	1
Bacteroides stercorirosoris	IniMTT	EndMTT	0	0.317311	0.303341	Increased	Tested	-1	1
Bacteroides stercorirosoris	IniMTT	FollUp	2	0.59298	0.315995	Increased	Tested	-0.333333	0.333333
Bacteroides stercorirosoris	EndMTT	FollUp	3	1	0.0126924	Increased	Tested	0	0
Bacteroides stercoris	Baseline	Vanco	1	0.654721	6.27651	Decreased	Tested	0.333333	0.333333
Bacteroides stercoris	Baseline	IniMTT	2	0.59298	1.41244	Decreased	Tested	0.333333	0.333333
Bacteroides stercoris	Baseline	EndMTT	3	0.465209	1.0812	Increased	Tested	-0.4	0.4
Bacteroides stercoris	Baseline	FollUp	3	0.465209	12.2919	Increased	Tested	-0.4	0.4
Bacteroides stercoris	Vanco	IniMTT	3	1	4.57681	Increased	Tested	0	0
Bacteroides stercoris	Vanco	EndMTT	4	0.715001	6.92317	Increased	Tested	-0.2	0.2
Bacteroides stercoris	Vanco	FollUp	1	0.144127	17.4718	Increased	Tested	-0.8	0.8
Bacteroides stercoris	IniMTT	EndMTT	2	0.59298	2.4589	Increased	Tested	-0.333333	0.333333
Bacteroides stercoris	IniMTT	FollUp	1	0.285049	13.5135	Increased	Tested	-0.666667	0.666667
Bacteroides stercoris	EndMTT	FollUp	3	0.465209	11.3333	Increased	Tested	-0.4	0.4
Bacteroides uniformis	Baseline	Vanco	0	0.03125	52.7856	Decreased	Tested	1	1
Bacteroides uniformis	Baseline	IniMTT	10	1	3.20208	Decreased	Tested	0.047619	0.047619
Bacteroides uniformis	Baseline	EndMTT	10	1	1.10825	Decreased	Tested	-0.047619	0.047619
Bacteroides uniformis	Baseline	FollUp	9	0.84375	3.52727	Increased	Tested	-0.142857	0.142857
Bacteroides uniformis	Vanco	IniMTT	1.5	0.0625	32.453	Increased	Tested	-0.857143	0.857143
Bacteroides uniformis	Vanco	EndMTT	1	0.0796158	33.8234	Increased	Tested	-0.866667	0.866667
Bacteroides uniformis	Vanco	FollUp	0	0.0431144	36.8574	Increased	Tested	-1	1
Bacteroides uniformis	IniMTT	EndMTT	6	0.68583	2.02886	Increased	Tested	-0.2	0.2
Bacteroides uniformis	IniMTT	FollUp	8	0.6875	6.52055	Increased	Tested	0.238095	0.238095
Bacteroides uniformis	EndMTT	FollUp	6	0.68583	4.58471	Increased	Tested	0.2	0.2
Phocaeicola vulgatus	Baseline	Vanco	2	0.09375	48.242	Decreased	Tested	0.809524	0.809524
Phocaeicola vulgatus	Baseline	IniMTT	7	0.5625	22.2534	Decreased	Tested	0.333333	0.333333
Phocaeicola vulgatus	Baseline	EndMTT	10	1	0.0554369	Increased	Tested	-0.047619	0.047619
Phocaeicola vulgatus	Baseline	FollUp	9	0.84375	1.91225	Increased	Tested	-0.142857	0.142857
Phocaeicola vulgatus	Vanco	IniMTT	6	0.4375	17.5312	Increased	Tested	-0.428571	0.428571
Phocaeicola vulgatus	Vanco	EndMTT	1	0.0625	32.5801	Increased	Tested	-0.904762	0.904762
Phocaeicola vulgatus	Vanco	FollUp	0	0.03125	33.8327	Increased	Tested	-1	1
Phocaeicola vulgatus	IniMTT	EndMTT	5	0.3125	18.248	Increased	Tested	-0.52381	0.52381
Phocaeicola vulgatus	IniMTT	FollUp	5	0.3125	19.7668	Increased	Tested	-0.52381	0.52381
Phocaeicola vulgatus	EndMTT	FollUp	9	0.84375	1.85784	Increased	Tested	-0.142857	0.142857
Bacteroides xylanisolvens	Baseline	Vanco	0	0.179712	8.85493	Decreased	Tested	1	1
Bacteroides xylanisolvens	Baseline	IniMTT	3	1	2.96785	Increased	Tested	0	0
Bacteroides xylanisolvens	Baseline	EndMTT	4	0.715001	2.68903	Increased	Tested	-0.2	0.2
Bacteroides xylanisolvens	Baseline	FollUp	1	0.0796158	18.6964	Increased	Tested	-0.866667	0.866667
Bacteroides xylanisolvens	Vanco	IniMTT	0	0.179712	10.861	Increased	Tested	-1	1
Bacteroides xylanisolvens	Vanco	EndMTT	0	0.108809	10.6049	Increased	Tested	-1	1
Bacteroides xylanisolvens	Vanco	FollUp	0	0.0431144	25.3101	Increased	Tested	-1	1
Bacteroides xylanisolvens	IniMTT	EndMTT	3	1	0.287346	Decreased	Tested	0	0
Bacteroides xylanisolvens	IniMTT	FollUp	3	0.224916	16.2096	Increased	Tested	-0.6	0.6
Bacteroides xylanisolvens	EndMTT	FollUp	1	0.0796158	16.4497	Increased	Tested	-0.866667	0.866667
Bariatricus massiliensis	Baseline	Vanco	0	0.317311	5.91558	Decreased	Tested	1	1
Bariatricus massiliensis	Baseline	IniMTT	0	0.317311	5.91558	Decreased	Tested	1	1
Bariatricus massiliensis	Baseline	EndMTT	1	0.654721	5.73291	Decreased	Tested	0.333333	0.333333
Bariatricus massiliensis	Baseline	FollUp	4	0.712702	5.2008	Decreased	Tested	-0.2	0.2
Bariatricus massiliensis	Vanco	IniMTT			0	No change	Identical Values
Bariatricus massiliensis	Vanco	EndMTT	0	0.317311	0.17247	Increased	Tested	-1	1
Bariatricus massiliensis	Vanco	FollUp	0	0.10247	0.674861	Increased	Tested	-1	1
Bariatricus massiliensis	IniMTT	EndMTT	0	0.317311	0.17247	Increased	Tested	-1	1
Bariatricus massiliensis	IniMTT	FollUp	0	0.10247	0.674861	Increased	Tested	-1	1
Bariatricus massiliensis	EndMTT	FollUp	0	0.179712	0.503259	Increased	Tested	-1	1
Barnesiella intestinihominis	Baseline	Vanco	1	0.654721	3.95874	Decreased	Tested	0.333333	0.333333
Barnesiella intestinihominis	Baseline	IniMTT	1	0.654721	7.42882	Increased	Tested	-0.333333	0.333333
Barnesiella intestinihominis	Baseline	EndMTT	1	0.285049	12.5243	Increased	Tested	-0.666667	0.666667
Barnesiella intestinihominis	Baseline	FollUp	1	0.285049	14.6649	Increased	Tested	-0.666667	0.666667
Barnesiella intestinihominis	Vanco	IniMTT	1	0.285049	10.9539	Increased	Tested	-0.666667	0.666667
Barnesiella intestinihominis	Vanco	EndMTT	1	0.285049	15.8554	Increased	Tested	-0.666667	0.666667
Barnesiella intestinihominis	Vanco	FollUp	0	0.108809	17.9145	Increased	Tested	-1	1
Barnesiella intestinihominis	IniMTT	EndMTT	0	0.108809	5.50443	Increased	Tested	-1	1
Barnesiella intestinihominis	IniMTT	FollUp	3	1	7.8168	Increased	Tested	0	0
Barnesiella intestinihominis	EndMTT	FollUp	3	1	2.44707	Increased	Tested	0	0
Bifidobacterium adolescentis	Baseline	Vanco	6	0.68583	19.5273	Decreased	Tested	0.2	0.2
Bifidobacterium adolescentis	Baseline	IniMTT	4	0.21875	51.525	Decreased	Tested	0.619048	0.619048
Bifidobacterium adolescentis	Baseline	EndMTT	5	0.500184	2.0517	Decreased	Tested	0.333333	0.333333
Bifidobacterium adolescentis	Baseline	FollUp	4	0.345231	8.22255	Decreased	Tested	0.466667	0.466667
Bifidobacterium adolescentis	Vanco	IniMTT	7	0.5625	26.7702	Decreased	Tested	0.333333	0.333333
Bifidobacterium adolescentis	Vanco	EndMTT	7	0.892738	14.6206	Increased	Tested	-0.0666667	0.0666667
Bifidobacterium adolescentis	Vanco	FollUp	7	0.892738	9.45789	Increased	Tested	-0.0666667	0.0666667
Bifidobacterium adolescentis	IniMTT	EndMTT	4	0.21875	32.6503	Increased	Tested	-0.619048	0.619048
Bifidobacterium adolescentis	IniMTT	FollUp	6	0.4375	28.5778	Increased	Tested	-0.428571	0.428571
Bifidobacterium adolescentis	EndMTT	FollUp	3	0.465209	6.04679	Decreased	Tested	0.4	0.4
Bifidobacterium angulatum	Baseline	Vanco	1	0.285049	1.63556	Decreased	Tested	0.666667	0.666667
Bifidobacterium angulatum	Baseline	IniMTT	0	0.108809	2.8299	Decreased	Tested	1	1
Bifidobacterium angulatum	Baseline	EndMTT	0	0.179712	2.34171	Decreased	Tested	1	1
Bifidobacterium angulatum	Baseline	FollUp	3	1	9.25291	Increased	Tested	0	0
Bifidobacterium angulatum	Vanco	IniMTT	0	0.317311	1.17512	Decreased	Tested	1	1
Bifidobacterium angulatum	Vanco	EndMTT	1	0.654721	0.694779	Decreased	Tested	0.333333	0.333333
Bifidobacterium angulatum	Vanco	FollUp	1	0.654721	10.7133	Increased	Tested	-0.333333	0.333333
Bifidobacterium angulatum	IniMTT	EndMTT	0	0.317311	0.474764	Increased	Tested	-1	1
Bifidobacterium angulatum	IniMTT	FollUp	0	0.317311	11.7503	Increased	Tested	-1	1
Bifidobacterium angulatum	EndMTT	FollUp	0	0.317311	11.3293	Increased	Tested	-1	1
Bifidobacterium animalis	Baseline	Vanco	1	0.654721	8.11306	Decreased	Tested	0.333333	0.333333
Bifidobacterium animalis	Baseline	IniMTT	0	0.179712	12.3403	Decreased	Tested	1	1
Bifidobacterium animalis	Baseline	EndMTT	0	0.179712	12.3403	Decreased	Tested	1	1
Bifidobacterium animalis	Baseline	FollUp	2	0.59298	2.41113	Decreased	Tested	0.333333	0.333333
Bifidobacterium animalis	Vanco	IniMTT	0	0.317311	3.91	Decreased	Tested	1	1
Bifidobacterium animalis	Vanco	EndMTT	0	0.317311	3.91	Decreased	Tested	1	1
Bifidobacterium animalis	Vanco	FollUp	1	0.654721	5.27405	Increased	Tested	-0.333333	0.333333
Bifidobacterium animalis	IniMTT	EndMTT			0	No change	Identical Values
Bifidobacterium animalis	IniMTT	FollUp	0	0.317311	8.83846	Increased	Tested	-1	1
Bifidobacterium animalis	EndMTT	FollUp	0	0.317311	8.83846	Increased	Tested	-1	1
Bifidobacterium bifidum	Baseline	Vanco	0	0.108809	15.1856	Increased	Tested	-1	1
Bifidobacterium bifidum	Baseline	IniMTT	1	0.144127	27.9788	Increased	Tested	-0.8	0.8
Bifidobacterium bifidum	Baseline	EndMTT	0	0.0678892	43.0658	Increased	Tested	-1	1
Bifidobacterium bifidum	Baseline	FollUp	0	0.0678892	43.0495	Increased	Tested	-1	1
Bifidobacterium bifidum	Vanco	IniMTT	9	0.84375	15.0838	Increased	Tested	-0.142857	0.142857
Bifidobacterium bifidum	Vanco	EndMTT	3	0.224916	32.872	Increased	Tested	-0.6	0.6
Bifidobacterium bifidum	Vanco	FollUp	3	0.224916	32.8528	Increased	Tested	-0.6	0.6
Bifidobacterium bifidum	IniMTT	EndMTT	4	0.345231	20.9479	Increased	Tested	-0.466667	0.466667
Bifidobacterium bifidum	IniMTT	FollUp	3	0.224916	20.9254	Increased	Tested	-0.6	0.6
Bifidobacterium bifidum	EndMTT	FollUp	5	1	0.02858	Decreased	Tested	0	0
Bifidobacterium breve	Baseline	Vanco	6	0.68583	3.18436	Decreased	Tested	0.2	0.2
Bifidobacterium breve	Baseline	IniMTT	2	0.273322	9.82028	Decreased	Tested	0.6	0.6
Bifidobacterium breve	Baseline	EndMTT	1	0.144127	10.4739	Decreased	Tested	0.8	0.8
Bifidobacterium breve	Baseline	FollUp	7	0.892738	1.46255	Decreased	Tested	-0.0666667	0.0666667
Bifidobacterium breve	Vanco	IniMTT	2	0.59298	6.43113	Decreased	Tested	0.333333	0.333333
Bifidobacterium breve	Vanco	EndMTT	1	0.285049	7.06461	Decreased	Tested	0.666667	0.666667
Bifidobacterium breve	Vanco	FollUp	3	0.465209	1.66867	Increased	Tested	-0.4	0.4
Bifidobacterium breve	IniMTT	EndMTT	0	0.317311	0.595202	Decreased	Tested	1	1
Bifidobacterium breve	IniMTT	FollUp	1	0.285049	7.61037	Increased	Tested	-0.666667	0.666667
Bifidobacterium breve	EndMTT	FollUp	1	0.285049	8.15702	Increased	Tested	-0.666667	0.666667
Bifidobacterium catenulatum	Baseline	Vanco	1	0.0796158	32.112	Decreased	Tested	0.866667	0.866667
Bifidobacterium catenulatum	Baseline	IniMTT	0	0.0431144	51.3512	Decreased	Tested	1	1
Bifidobacterium catenulatum	Baseline	EndMTT	0	0.0431144	40.9463	Decreased	Tested	1	1
Bifidobacterium catenulatum	Baseline	FollUp	1	0.0796158	33.1807	Decreased	Tested	0.866667	0.866667
Bifidobacterium catenulatum	Vanco	IniMTT	0	0.0678892	14.5628	Decreased	Tested	1	1
Bifidobacterium catenulatum	Vanco	EndMTT	4	0.345231	6.68699	Decreased	Tested	0.466667	0.466667
Bifidobacterium catenulatum	Vanco	FollUp	5	0.500184	0.808938	Decreased	Tested	0.333333	0.333333
Bifidobacterium catenulatum	IniMTT	EndMTT	0	0.179712	6.87466	Increased	Tested	-1	1
Bifidobacterium catenulatum	IniMTT	FollUp	0	0.0431144	12.0055	Increased	Tested	-1	1
Bifidobacterium catenulatum	EndMTT	FollUp	2	0.138011	5.50963	Increased	Tested	-0.733333	0.733333
Bifidobacterium_u_s	Baseline	Vanco	1	0.0796158	22.9783	Decreased	Tested	0.866667	0.866667
Bifidobacterium_u_s	Baseline	IniMTT	1	0.0796158	35.7141	Decreased	Tested	0.866667	0.866667
Bifidobacterium_u_s	Baseline	EndMTT	0	0.0431144	30.2359	Decreased	Tested	1	1
Bifidobacterium_u_s	Baseline	FollUp	0	0.0431144	26.7999	Decreased	Tested	1	1
Bifidobacterium_u_s	Vanco	IniMTT	1	0.654721	10.3562	Decreased	Tested	0.333333	0.333333
Bifidobacterium_u_s	Vanco	EndMTT	2	0.59298	5.90158	Decreased	Tested	0.333333	0.333333
Bifidobacterium_u_s	Vanco	FollUp	4	0.715001	3.10754	Decreased	Tested	-0.2	0.2
Bifidobacterium_u_s	IniMTT	EndMTT	1	0.654721	4.03657	Increased	Tested	-0.333333	0.333333
Bifidobacterium_u_s	IniMTT	FollUp	2	0.59298	6.56841	Increased	Tested	-0.333333	0.333333
Bifidobacterium_u_s	EndMTT	FollUp	0	0.108809	2.63834	Increased	Tested	-1	1
Bifidobacterium longum	Baseline	Vanco	3	0.15625	45.7595	Decreased	Tested	0.714286	0.714286
Bifidobacterium longum	Baseline	IniMTT	3	0.224916	51.7967	Decreased	Tested	0.6	0.6
Bifidobacterium longum	Baseline	EndMTT	3	0.224916	36.2005	Decreased	Tested	0.6	0.6
Bifidobacterium longum	Baseline	FollUp	5	0.500184	8.31194	Decreased	Tested	0.333333	0.333333
Bifidobacterium longum	Vanco	IniMTT	10	1	4.14187	Decreased	Tested	0.047619	0.047619
Bifidobacterium longum	Vanco	EndMTT	10	1	6.55809	Increased	Tested	-0.047619	0.047619
Bifidobacterium longum	Vanco	FollUp	7	0.5625	25.6913	Increased	Tested	-0.333333	0.333333
Bifidobacterium longum	IniMTT	EndMTT	3	0.465209	10.2744	Increased	Tested	-0.4	0.4
Bifidobacterium longum	IniMTT	FollUp	5	0.500184	28.6467	Increased	Tested	-0.333333	0.333333
Bifidobacterium longum	EndMTT	FollUp	6	0.68583	20.4761	Increased	Tested	-0.2	0.2
Bifidobacterium merycicum	Baseline	Vanco	1	0.285049	0.822344	Decreased	Tested	0.666667	0.666667
Bifidobacterium merycicum	Baseline	IniMTT	0	0.108809	2.19439	Decreased	Tested	1	1
Bifidobacterium merycicum	Baseline	EndMTT	0	0.108809	0.84004	Decreased	Tested	1	1
Bifidobacterium merycicum	Baseline	FollUp	3	1	2.9444	Increased	Tested	0	0
Bifidobacterium merycicum	Vanco	IniMTT	0	0.317311	1.36085	Decreased	Tested	1	1
Bifidobacterium merycicum	Vanco	EndMTT	1	0.654721	0.0175522	Decreased	Tested	0.333333	0.333333
Bifidobacterium merycicum	Vanco	FollUp	1	0.654721	3.73602	Increased	Tested	-0.333333	0.333333
Bifidobacterium merycicum	IniMTT	EndMTT	0	0.179712	1.32526	Increased	Tested	-1	1
Bifidobacterium merycicum	IniMTT	FollUp	0	0.317311	5.02844	Increased	Tested	-1	1
Bifidobacterium merycicum	EndMTT	FollUp	1	0.654721	3.75291	Increased	Tested	-0.333333	0.333333
Bifidobacterium pseudocatenulatum	Baseline	Vanco	1	0.0796158	45.3412	Decreased	Tested	0.866667	0.866667
Bifidobacterium pseudocatenulatum	Baseline	IniMTT	0	0.0431144	81.0176	Decreased	Tested	1	1
Bifidobacterium pseudocatenulatum	Baseline	EndMTT	1	0.0796158	63.5291	Decreased	Tested	0.866667	0.866667
Bifidobacterium pseudocatenulatum	Baseline	FollUp	0	0.0431144	66.2237	Decreased	Tested	1	1
Bifidobacterium pseudocatenulatum	Vanco	IniMTT	0	0.179712	24.5466	Decreased	Tested	1	1
Bifidobacterium pseudocatenulatum	Vanco	EndMTT	2	0.59298	12.5139	Decreased	Tested	0.333333	0.333333
Bifidobacterium pseudocatenulatum	Vanco	FollUp	2	0.59298	14.3679	Decreased	Tested	0.333333	0.333333
Bifidobacterium pseudocatenulatum	IniMTT	EndMTT	0	0.317311	9.66121	Increased	Tested	-1	1
Bifidobacterium pseudocatenulatum	IniMTT	FollUp	0	0.317311	8.17259	Increased	Tested	-1	1
Bifidobacterium pseudocatenulatum	EndMTT	FollUp	0	0.317311	1.64782	Decreased	Tested	1	1
Bifidobacterium ruminantium	Baseline	Vanco	4	0.715001	1.97293	Decreased	Tested	0.2	0.2
Bifidobacterium ruminantium	Baseline	IniMTT	2	0.138011	12.3602	Decreased	Tested	0.733333	0.733333
Bifidobacterium ruminantium	Baseline	EndMTT	1	0.144127	9.00755	Decreased	Tested	0.8	0.8
Bifidobacterium ruminantium	Baseline	FollUp	1	0.144127	8.55451	Decreased	Tested	0.8	0.8
Bifidobacterium ruminantium	Vanco	IniMTT	3	0.224916	10.1863	Decreased	Tested	0.6	0.6
Bifidobacterium ruminantium	Vanco	EndMTT	3	0.465209	6.89851	Decreased	Tested	0.4	0.4
Bifidobacterium ruminantium	Vanco	FollUp	3	0.465209	6.45424	Decreased	Tested	0.4	0.4
Bifidobacterium ruminantium	IniMTT	EndMTT	1	0.144127	2.98382	Increased	Tested	-0.8	0.8
Bifidobacterium ruminantium	IniMTT	FollUp	2	0.273322	3.38702	Increased	Tested	-0.6	0.6
Bifidobacterium ruminantium	EndMTT	FollUp	1	0.654721	0.4156	Increased	Tested	-0.333333	0.333333
Bilophila_u_s	Baseline	Vanco	1	0.0625	18.8006	Increased	Tested	-0.904762	0.904762
Bilophila_u_s	Baseline	IniMTT	2	0.09375	12.1148	Increased	Tested	-0.809524	0.809524
Bilophila_u_s	Baseline	EndMTT	6	0.4375	2.60126	Increased	Tested	-0.428571	0.428571
Bilophila_u_s	Baseline	FollUp	6	0.68583	1.82768	Increased	Tested	-0.2	0.2
Bilophila_u_s	Vanco	IniMTT	7	0.5625	8.23377	Decreased	Tested	0.333333	0.333333
Bilophila_u_s	Vanco	EndMTT	0	0.0431144	19.95	Decreased	Tested	1	1
Bilophila_u_s	Vanco	FollUp	3	0.15625	20.9027	Decreased	Tested	0.714286	0.714286
Bilophila_u_s	IniMTT	EndMTT	4	0.21875	10.8249	Decreased	Tested	0.619048	0.619048
Bilophila_u_s	IniMTT	FollUp	3	0.15625	11.7052	Decreased	Tested	0.714286	0.714286
Bilophila_u_s	EndMTT	FollUp	7	0.892738	0.794233	Decreased	Tested	0.0666667	0.0666667
Bilophila wadsworthia	Baseline	Vanco	1	0.0625	25.4167	Increased	Tested	-0.904762	0.904762
Bilophila wadsworthia	Baseline	IniMTT	1	0.0625	19.7119	Increased	Tested	-0.904762	0.904762
Bilophila wadsworthia	Baseline	EndMTT	9	0.84375	0.451944	Increased	Tested	-0.142857	0.142857
Bilophila wadsworthia	Baseline	FollUp	1	0.144127	7.25468	Decreased	Tested	0.8	0.8
Bilophila wadsworthia	Vanco	IniMTT	7	0.5625	7.6489	Decreased	Tested	0.333333	0.333333
Bilophila wadsworthia	Vanco	EndMTT	0	0.03125	33.4723	Decreased	Tested	1	1
Bilophila wadsworthia	Vanco	FollUp	1	0.0625	43.8052	Decreased	Tested	0.904762	0.904762
Bilophila wadsworthia	IniMTT	EndMTT	2	0.09375	23.9886	Decreased	Tested	0.809524	0.809524
Bilophila wadsworthia	IniMTT	FollUp	0	0.03125	33.5873	Decreased	Tested	1	1
Bilophila wadsworthia	EndMTT	FollUp	5	0.3125	7.74161	Decreased	Tested	0.52381	0.52381
Bittarella massiliensis	Baseline	Vanco	3	0.465209	1.96669	Decreased	Tested	0.4	0.4
Bittarella massiliensis	Baseline	IniMTT	7	0.892738	1.44206	Decreased	Tested	-0.0666667	0.0666667
Bittarella massiliensis	Baseline	EndMTT	7	0.5625	4.40322	Increased	Tested	-0.333333	0.333333
Bittarella massiliensis	Baseline	FollUp	7	0.892738	0.690694	Decreased	Tested	0.0666667	0.0666667
Bittarella massiliensis	Vanco	IniMTT	4	0.715001	0.514512	Increased	Tested	-0.2	0.2
Bittarella massiliensis	Vanco	EndMTT	5	0.3125	6.24705	Increased	Tested	-0.52381	0.52381
Bittarella massiliensis	Vanco	FollUp	5	0.500184	1.25138	Increased	Tested	-0.333333	0.333333
Bittarella massiliensis	IniMTT	EndMTT	2	0.138011	5.76218	Increased	Tested	-0.733333	0.733333
Bittarella massiliensis	IniMTT	FollUp	4	0.345231	0.740682	Increased	Tested	-0.466667	0.466667
Bittarella massiliensis	EndMTT	FollUp	4.5	0.3125	5.32854	Decreased	Tested	0.571429	0.571429
Blautia coccoides	Baseline	Vanco	1	0.654721	5.92351	Decreased	Tested	0.333333	0.333333
Blautia coccoides	Baseline	IniMTT	0	0.179712	6.38193	Decreased	Tested	1	1
Blautia coccoides	Baseline	EndMTT	0	0.179712	6.81467	Decreased	Tested	1	1
Blautia coccoides	Baseline	FollUp	0	0.179712	7.16824	Decreased	Tested	1	1
Blautia coccoides	Vanco	IniMTT	1	0.654721	0.432786	Decreased	Tested	0.333333	0.333333
Blautia coccoides	Vanco	EndMTT	1	0.654721	0.841323	Decreased	Tested	0.333333	0.333333
Blautia coccoides	Vanco	FollUp	0	0.317311	1.17512	Decreased	Tested	1	1
Blautia coccoides	IniMTT	EndMTT	0	0.317311	0.406776	Decreased	Tested	1	1
Blautia coccoides	IniMTT	FollUp	0	0.317311	0.739137	Decreased	Tested	1	1
Blautia coccoides	EndMTT	FollUp	0	0.317311	0.331014	Decreased	Tested	1	1
Blautia hydrogenotrophica	Baseline	Vanco	6	0.68583	2.18675	Decreased	Tested	0.2	0.2
Blautia hydrogenotrophica	Baseline	IniMTT	8	0.6875	7.99434	Decreased	Tested	0.238095	0.238095
Blautia hydrogenotrophica	Baseline	EndMTT	1	0.0796158	12.7658	Increased	Tested	-0.866667	0.866667
Blautia hydrogenotrophica	Baseline	FollUp	6	0.68583	3.59575	Increased	Tested	-0.2	0.2
Blautia hydrogenotrophica	Vanco	IniMTT	10	1	5.68331	Decreased	Tested	-0.047619	0.047619
Blautia hydrogenotrophica	Vanco	EndMTT	2	0.138011	14.6325	Increased	Tested	-0.733333	0.733333
Blautia hydrogenotrophica	Vanco	FollUp	5	0.500184	5.65875	Increased	Tested	-0.333333	0.333333
Blautia hydrogenotrophica	IniMTT	EndMTT	4	0.21875	19.2233	Increased	Tested	-0.619048	0.619048
Blautia hydrogenotrophica	IniMTT	FollUp	7	0.5625	10.7321	Increased	Tested	-0.333333	0.333333
Blautia hydrogenotrophica	EndMTT	FollUp	0	0.0431144	10.5119	Decreased	Tested	1	1
Blautia luti	Baseline	Vanco	6	0.68583	1.8848	Increased	Tested	0.2	0.2
Blautia luti	Baseline	IniMTT	1	0.285049	6.77697	Increased	Tested	-0.666667	0.666667
Blautia luti	Baseline	EndMTT	4	0.345231	12.7231	Increased	Tested	-0.466667	0.466667
Blautia luti	Baseline	FollUp	3	0.224916	19.8186	Increased	Tested	-0.6	0.6
Blautia luti	Vanco	IniMTT	6	0.68583	4.98615	Increased	Tested	-0.2	0.2
Blautia luti	Vanco	EndMTT	1	0.0796158	11.0465	Increased	Tested	-0.866667	0.866667
Blautia luti	Vanco	FollUp	1	0.0796158	18.2784	Increased	Tested	-0.866667	0.866667
Blautia luti	IniMTT	EndMTT	6	0.68583	6.37843	Increased	Tested	-0.2	0.2
Blautia luti	IniMTT	FollUp	4	0.345231	13.9898	Increased	Tested	-0.466667	0.466667
Blautia luti	EndMTT	FollUp	1	0.144127	8.12988	Increased	Tested	-0.8	0.8
Blautia massiliensis	Baseline	Vanco	1	0.0796158	21.1969	Decreased	Tested	0.866667	0.866667
Blautia massiliensis	Baseline	IniMTT	8	0.6875	10.2276	Decreased	Tested	0.238095	0.238095
Blautia massiliensis	Baseline	EndMTT	7	0.5625	14.3217	Increased	Tested	-0.333333	0.333333
Blautia massiliensis	Baseline	FollUp	7	0.5625	14.1726	Increased	Tested	-0.333333	0.333333
Blautia massiliensis	Vanco	IniMTT	7	0.5625	9.05082	Increased	Tested	-0.333333	0.333333
Blautia massiliensis	Vanco	EndMTT	0	0.0431144	29.3065	Increased	Tested	-1	1
Blautia massiliensis	Vanco	FollUp	0	0.0431144	29.1836	Increased	Tested	-1	1
Blautia massiliensis	IniMTT	EndMTT	6	0.4375	22.2714	Increased	Tested	-0.428571	0.428571
Blautia massiliensis	IniMTT	FollUp	3	0.15625	22.1363	Increased	Tested	-0.714286	0.714286
Blautia massiliensis	EndMTT	FollUp	6	0.68583	0.173925	Decreased	Tested	-0.2	0.2
Blautia producta	Baseline	Vanco	2	0.59298	4.74707	Decreased	Tested	0.333333	0.333333
Blautia producta	Baseline	IniMTT	3	1	0.126547	Decreased	Tested	0	0
Blautia producta	Baseline	EndMTT	2	0.59298	1.37043	Decreased	Tested	0.333333	0.333333
Blautia producta	Baseline	FollUp	0	0.108809	9.8866	Decreased	Tested	1	1
Blautia producta	Vanco	IniMTT	4	0.715001	4.41112	Increased	Tested	0.2	0.2
Blautia producta	Vanco	EndMTT	4	0.715001	3.22361	Increased	Tested	0.2	0.2
Blautia producta	Vanco	FollUp	1.5	0.197466	4.90661	Decreased	Tested	0.7	0.7
Blautia producta	IniMTT	EndMTT	0	0.317311	1.24231	Decreased	Tested	1	1
Blautia producta	IniMTT	FollUp	0	0.317311	9.74772	Decreased	Tested	1	1
Blautia producta	EndMTT	FollUp	0	0.317311	8.40104	Decreased	Tested	1	1
Blautia schinkii	Baseline	Vanco	0	0.317311	5.50774	Decreased	Tested	1	1
Blautia schinkii	Baseline	IniMTT	0	0.317311	5.32577	Decreased	Tested	1	1
Blautia schinkii	Baseline	EndMTT	0	0.317311	0.415395	Decreased	Tested	1	1
Blautia schinkii	Baseline	FollUp	0	0.317311	4.86534	Decreased	Tested	1	1
Blautia schinkii	Vanco	IniMTT	0	0.317311	0.17247	Increased	Tested	-1	1
Blautia schinkii	Vanco	EndMTT	0	0.317311	4.82651	Increased	Tested	-1	1
Blautia schinkii	Vanco	FollUp	0	0.317311	0.608867	Increased	Tested	-1	1
Blautia schinkii	IniMTT	EndMTT	0	0.317311	4.66208	Increased	Tested	-1	1
Blautia schinkii	IniMTT	FollUp	0	0.317311	0.437151	Increased	Tested	-1	1
Blautia schinkii	EndMTT	FollUp	0	0.317311	4.43153	Decreased	Tested	1	1
Blautia_u_s	Baseline	Vanco	3	0.15625	38.3706	Decreased	Tested	0.714286	0.714286
Blautia_u_s	Baseline	IniMTT	7	0.5625	23.3139	Decreased	Tested	0.333333	0.333333
Blautia_u_s	Baseline	EndMTT	6	0.4375	5.95377	Increased	Tested	-0.428571	0.428571
Blautia_u_s	Baseline	FollUp	7	0.5625	13.5242	Increased	Tested	-0.333333	0.333333
Blautia_u_s	Vanco	IniMTT	8	0.6875	10.8814	Increased	Tested	-0.238095	0.238095
Blautia_u_s	Vanco	EndMTT	0	0.03125	32.0331	Increased	Tested	-1	1
Blautia_u_s	Vanco	FollUp	1	0.0625	37.5042	Increased	Tested	-0.904762	0.904762
Blautia_u_s	IniMTT	EndMTT	10	1	23.7343	Increased	Tested	-0.047619	0.047619
Blautia_u_s	IniMTT	FollUp	4	0.21875	29.8734	Increased	Tested	-0.619048	0.619048
Blautia_u_s	EndMTT	FollUp	6	0.4375	8.0497	Increased	Tested	-0.428571	0.428571
Blautia faecicola	Baseline	Vanco	0	0.03125	13.0146	Decreased	Tested	1	1
Blautia faecicola	Baseline	IniMTT	5	0.500184	2.4627	Increased	Tested	0.333333	0.333333
Blautia faecicola	Baseline	EndMTT	3	0.224916	11.6781	Increased	Tested	-0.6	0.6
Blautia faecicola	Baseline	FollUp	2	0.09375	19.8554	Increased	Tested	-0.809524	0.809524
Blautia faecicola	Vanco	IniMTT	0	0.0678892	13.695	Increased	Tested	-1	1
Blautia faecicola	Vanco	EndMTT	0	0.03125	21.8492	Increased	Tested	-1	1
Blautia faecicola	Vanco	FollUp	0	0.03125	29.0847	Increased	Tested	-1	1
Blautia faecicola	IniMTT	EndMTT	3	0.224916	9.44811	Increased	Tested	-0.6	0.6
Blautia faecicola	IniMTT	FollUp	3	0.15625	17.8318	Increased	Tested	-0.714286	0.714286
Blautia faecicola	EndMTT	FollUp	8	0.6875	9.25844	Increased	Tested	-0.238095	0.238095
Blautia argi	Baseline	Vanco	0	0.179712	2.50623	Decreased	Tested	1	1
Blautia argi	Baseline	IniMTT	0	0.179712	7.98223	Decreased	Tested	1	1
Blautia argi	Baseline	EndMTT	0	0.179712	6.20557	Decreased	Tested	1	1
Blautia argi	Baseline	FollUp	0	0.179712	5.87249	Decreased	Tested	1	1
Blautia argi	Vanco	IniMTT	1	0.654721	5.34212	Decreased	Tested	0.333333	0.333333
Blautia argi	Vanco	EndMTT	1	0.654721	3.6089	Decreased	Tested	0.333333	0.333333
Blautia argi	Vanco	FollUp	1	0.654721	3.28396	Decreased	Tested	0.333333	0.333333
Blautia argi	IniMTT	EndMTT	0	0.179712	1.64532	Increased	Tested	-1	1
Blautia argi	IniMTT	FollUp	0	0.179712	1.95379	Increased	Tested	-1	1
Blautia argi	EndMTT	FollUp	0	0.317311	0.31362	Increased	Tested	-1	1
Blautia wexlerae	Baseline	Vanco	0	0.03125	27.5144	Decreased	Tested	1	1
Blautia wexlerae	Baseline	IniMTT	3	0.15625	26.9283	Decreased	Tested	0.714286	0.714286
Blautia wexlerae	Baseline	EndMTT	0	0.03125	12.7516	Decreased	Tested	1	1
Blautia wexlerae	Baseline	FollUp	8	0.6875	7.14686	Increased	Tested	-0.238095	0.238095
Blautia wexlerae	Vanco	IniMTT	10	1	0.459664	Increased	Tested	0.047619	0.047619
Blautia wexlerae	Vanco	EndMTT	4	0.21875	11.5773	Increased	Tested	-0.619048	0.619048
Blautia wexlerae	Vanco	FollUp	1	0.0625	27.1822	Increased	Tested	-0.904762	0.904762
Blautia wexlerae	IniMTT	EndMTT	7	0.5625	11.169	Increased	Tested	-0.333333	0.333333
Blautia wexlerae	IniMTT	FollUp	0	0.03125	26.846	Increased	Tested	-1	1
Blautia wexlerae	EndMTT	FollUp	6	0.4375	17.6481	Increased	Tested	-0.428571	0.428571
Burkholderiales_u_s	Baseline	Vanco	4	0.715001	8.13172	Increased	Tested	-0.2	0.2
Burkholderiales_u_s	Baseline	IniMTT	2	0.273322	7.89443	Increased	Tested	-0.6	0.6
Burkholderiales_u_s	Baseline	EndMTT	3	0.465209	8.18259	Decreased	Tested	0.4	0.4
Burkholderiales_u_s	Baseline	FollUp	5	0.500184	9.16783	Decreased	Tested	0.333333	0.333333
Burkholderiales_u_s	Vanco	IniMTT	6	0.68583	0.258289	Decreased	Tested	0.2	0.2
Burkholderiales_u_s	Vanco	EndMTT	2	0.138011	17.7584	Decreased	Tested	0.733333	0.733333
Burkholderiales_u_s	Vanco	FollUp	1	0.144127	18.8308	Decreased	Tested	0.8	0.8
Burkholderiales_u_s	IniMTT	EndMTT	2	0.138011	17.455	Decreased	Tested	0.733333	0.733333
Burkholderiales_u_s	IniMTT	FollUp	1.5	0.104059	18.5247	Decreased	Tested	0.8	0.8
Burkholderiales_u_s	EndMTT	FollUp	5	0.500184	0.91072	Decreased	Tested	0.333333	0.333333
Butyricicoccus pullicaecorum	Baseline	Vanco	0	0.179712	0.811214	Decreased	Tested	1	1
Butyricicoccus pullicaecorum	Baseline	IniMTT	0	0.179712	0.478615	Decreased	Tested	1	1
Butyricicoccus pullicaecorum	Baseline	EndMTT	1	0.654721	0.0461858	Increased	Tested	-0.333333	0.333333
Butyricicoccus pullicaecorum	Baseline	FollUp	1	0.654721	3.61704	Increased	Tested	-0.333333	0.333333
Butyricicoccus pullicaecorum	Vanco	IniMTT	0	0.317311	0.329922	Increased	Tested	-1	1
Butyricicoccus pullicaecorum	Vanco	EndMTT	0	0.317311	0.8505	Increased	Tested	-1	1
Butyricicoccus pullicaecorum	Vanco	FollUp	0	0.179712	4.39262	Increased	Tested	-1	1
Butyricicoccus pullicaecorum	IniMTT	EndMTT	0	0.317311	0.522301	Increased	Tested	-1	1
Butyricicoccus pullicaecorum	IniMTT	FollUp	0	0.179712	4.07615	Increased	Tested	-1	1
Butyricicoccus pullicaecorum	EndMTT	FollUp	0	0.179712	3.57251	Increased	Tested	-1	1
Butyricicoccus_u_s	Baseline	Vanco	0	0.03125	29.662	Decreased	Tested	1	1
Butyricicoccus_u_s	Baseline	IniMTT	6	0.4375	10.0142	Decreased	Tested	0.428571	0.428571
Butyricicoccus_u_s	Baseline	EndMTT	0	0.03125	15.3384	Decreased	Tested	1	1
Butyricicoccus_u_s	Baseline	FollUp	10	1	4.24157	Increased	Tested	-0.047619	0.047619
Butyricicoccus_u_s	Vanco	IniMTT	4	0.21875	15.1531	Increased	Tested	-0.619048	0.619048
Butyricicoccus_u_s	Vanco	EndMTT	1	0.0796158	11.0469	Increased	Tested	-0.866667	0.866667
Butyricicoccus_u_s	Vanco	FollUp	0	0.03125	26.1477	Increased	Tested	-1	1
Butyricicoccus_u_s	IniMTT	EndMTT	7	0.5625	4.83954	Decreased	Tested	0.333333	0.333333
Butyricicoccus_u_s	IniMTT	FollUp	1	0.0625	12.9581	Increased	Tested	-0.904762	0.904762
Butyricicoccus_u_s	EndMTT	FollUp	0	0.03125	16.9761	Increased	Tested	-1	1
Butyricimonas_u_s	Baseline	Vanco	1.5	0.414216	0.331588	Decreased	Tested	0.5	0.5
Butyricimonas_u_s	Baseline	IniMTT	0	0.179712	6.74173	Increased	Tested	-1	1
Butyricimonas_u_s	Baseline	EndMTT	0	0.108809	8.88401	Increased	Tested	-1	1
Butyricimonas_u_s	Baseline	FollUp	1	0.144127	3.25315	Increased	Tested	-0.8	0.8
Butyricimonas_u_s	Vanco	IniMTT	1	0.285049	7.04994	Increased	Tested	-0.666667	0.666667
Butyricimonas_u_s	Vanco	EndMTT	1.5	0.197466	9.18514	Increased	Tested	-0.7	0.7
Butyricimonas_u_s	Vanco	FollUp	0	0.108809	3.57289	Increased	Tested	-1	1
Butyricimonas_u_s	IniMTT	EndMTT	2	0.59298	2.29715	Increased	Tested	-0.333333	0.333333
Butyricimonas_u_s	IniMTT	FollUp	3	0.465209	3.74077	Decreased	Tested	0.4	0.4
Butyricimonas_u_s	EndMTT	FollUp	3	0.465209	6.17988	Decreased	Tested	0.4	0.4
Butyricimonas virosa	Baseline	Vanco	1	0.654721	0.176278	Decreased	Tested	0.333333	0.333333
Butyricimonas virosa	Baseline	IniMTT	2	0.59298	2.15127	Increased	Tested	-0.333333	0.333333
Butyricimonas virosa	Baseline	EndMTT	0	0.0678892	10.9986	Increased	Tested	-1	1
Butyricimonas virosa	Baseline	FollUp	0	0.108809	5.39147	Increased	Tested	-1	1
Butyricimonas virosa	Vanco	IniMTT	5	1	2.32345	Increased	Tested	0	0
Butyricimonas virosa	Vanco	EndMTT	1	0.144127	11.1552	Increased	Tested	-0.8	0.8
Butyricimonas virosa	Vanco	FollUp	0	0.108809	5.55795	Increased	Tested	-1	1
Butyricimonas virosa	IniMTT	EndMTT	1	0.144127	9.04188	Increased	Tested	-0.8	0.8
Butyricimonas virosa	IniMTT	FollUp	2	0.59298	3.31143	Increased	Tested	-0.333333	0.333333
Butyricimonas virosa	EndMTT	FollUp	3	0.465209	6.30009	Decreased	Tested	0.4	0.4
Butyrivibrio crossotus	Baseline	Vanco	0	0.10247	1.2099	Decreased	Tested	1	1
Butyrivibrio crossotus	Baseline	IniMTT	3	1	0.526877	Decreased	Tested	0	0
Butyrivibrio crossotus	Baseline	EndMTT	1	0.654721	0.220925	Decreased	Tested	0.333333	0.333333
Butyrivibrio crossotus	Baseline	FollUp	3.5	0.580712	0.367519	Decreased	Tested	0.3	0.3
Butyrivibrio crossotus	Vanco	IniMTT	0	0.10247	0.674861	Increased	Tested	-1	1
Butyrivibrio crossotus	Vanco	EndMTT	0	0.108809	0.977155	Increased	Tested	-1	1
Butyrivibrio crossotus	Vanco	FollUp	0	0.10247	0.832313	Increased	Tested	-1	1
Butyrivibrio crossotus	IniMTT	EndMTT	1	0.654721	0.304348	Increased	Tested	-0.333333	0.333333
Butyrivibrio crossotus	IniMTT	FollUp	7	0.891756	0.158522	Increased	Tested	-0.0666667	0.0666667
Butyrivibrio crossotus	EndMTT	FollUp	5	1	0.146271	Decreased	Tested	0	0
Campylobacter_u_s	Baseline	Vanco	0	0.108809	2.73571	Decreased	Tested	1	1
Campylobacter_u_s	Baseline	IniMTT	0	0.108809	1.64298	Decreased	Tested	1	1
Campylobacter_u_s	Baseline	EndMTT	0	0.108809	2.73571	Decreased	Tested	1	1
Campylobacter_u_s	Baseline	FollUp	0	0.108809	2.73571	Decreased	Tested	1	1
Campylobacter_u_s	Vanco	IniMTT	0	0.317311	1.06364	Increased	Tested	-1	1
Campylobacter_u_s	Vanco	EndMTT			0	No change	Identical Values
Campylobacter_u_s	Vanco	FollUp			0	No change	Identical Values
Campylobacter_u_s	IniMTT	EndMTT	0	0.317311	1.07507	Decreased	Tested	1	1
Campylobacter_u_s	IniMTT	FollUp	0	0.317311	1.07507	Decreased	Tested	1	1
Campylobacter_u_s	EndMTT	FollUp			0	No change	Identical Values
Alistipes ihumii	Baseline	Vanco	0	0.0678892	27.1309	Decreased	Tested	1	1
Alistipes ihumii	Baseline	IniMTT	0	0.0678892	35.2369	Decreased	Tested	1	1
Alistipes ihumii	Baseline	EndMTT	0	0.0678892	25.3342	Decreased	Tested	1	1
Alistipes ihumii	Baseline	FollUp	0	0.0678892	17.4271	Decreased	Tested	1	1
Alistipes ihumii	Vanco	IniMTT	0	0.179712	6.37611	Decreased	Tested	1	1
Alistipes ihumii	Vanco	EndMTT	1	0.654721	1.41327	Increased	Tested	-0.333333	0.333333
Alistipes ihumii	Vanco	FollUp	1	0.285049	7.63296	Increased	Tested	-0.666667	0.666667
Alistipes ihumii	IniMTT	EndMTT	0	0.317311	7.32248	Increased	Tested	-1	1
Alistipes ihumii	IniMTT	FollUp	0	0.179712	13.1694	Increased	Tested	-1	1
Alistipes ihumii	EndMTT	FollUp	0	0.179712	6.30885	Increased	Tested	-1	1
Bacteroides timonensis	Baseline	Vanco	0	0.108809	6.867	Decreased	Tested	1	1
Bacteroides timonensis	Baseline	IniMTT	1.5	0.197466	6.33011	Decreased	Tested	0.7	0.7
Bacteroides timonensis	Baseline	EndMTT	2.5	0.357273	5.27319	Decreased	Tested	0.5	0.5
Bacteroides timonensis	Baseline	FollUp	2	0.59298	0.492	Decreased	Tested	0.333333	0.333333
Bacteroides timonensis	Vanco	IniMTT	0	0.179712	0.502391	Increased	Tested	-1	1
Bacteroides timonensis	Vanco	EndMTT	0	0.179712	1.4914	Increased	Tested	-1	1
Bacteroides timonensis	Vanco	FollUp	0	0.179712	5.96536	Increased	Tested	-1	1
Bacteroides timonensis	IniMTT	EndMTT	0	0.179712	0.993998	Increased	Tested	-1	1
Bacteroides timonensis	IniMTT	FollUp	1	0.285049	5.49055	Increased	Tested	-0.666667	0.666667
Bacteroides timonensis	EndMTT	FollUp	1	0.285049	4.5417	Increased	Tested	-0.666667	0.666667
Candidatus Stoquefichus massiliensis	Baseline	Vanco	1	0.654721	0.17334	Decreased	Tested	0.333333	0.333333
Candidatus Stoquefichus massiliensis	Baseline	IniMTT	0	0.179712	0.504928	Decreased	Tested	1	1
Candidatus Stoquefichus massiliensis	Baseline	EndMTT	3	1	0	No change	Tested	0	0
Candidatus Stoquefichus massiliensis	Baseline	FollUp	0	0.179712	0.504928	Decreased	Tested	1	1
Candidatus Stoquefichus massiliensis	Vanco	IniMTT	0	0.317311	0.331014	Decreased	Tested	1	1
Candidatus Stoquefichus massiliensis	Vanco	EndMTT	0	0.317311	0.17304	Increased	Tested	-1	1
Candidatus Stoquefichus massiliensis	Vanco	FollUp	0	0.317311	0.331014	Decreased	Tested	1	1
Candidatus Stoquefichus massiliensis	IniMTT	EndMTT	0	0.179712	0.502391	Increased	Tested	-1	1
Candidatus Stoquefichus massiliensis	IniMTT	FollUp			0	No change	Identical Values
Candidatus Stoquefichus massiliensis	EndMTT	FollUp	0	0.179712	0.504928	Decreased	Tested	1	1
Catabacter hongkongensis	Baseline	Vanco	1	0.144127	5.36453	Decreased	Tested	0.8	0.8
Catabacter hongkongensis	Baseline	IniMTT	10	1	4.37095	Decreased	Tested	0.047619	0.047619
Catabacter hongkongensis	Baseline	EndMTT	5	0.500184	4.6973	Increased	Tested	-0.333333	0.333333
Catabacter hongkongensis	Baseline	FollUp	3	0.224916	2.62822	Decreased	Tested	0.6	0.6
Catabacter hongkongensis	Vanco	IniMTT	8	0.6875	0.942997	Increased	Tested	-0.238095	0.238095
Catabacter hongkongensis	Vanco	EndMTT	0	0.03125	9.54954	Increased	Tested	-1	1
Catabacter hongkongensis	Vanco	FollUp	5	0.3125	2.59699	Increased	Tested	-0.52381	0.52381
Catabacter hongkongensis	IniMTT	EndMTT	8	0.6875	8.68848	Increased	Tested	-0.238095	0.238095
Catabacter hongkongensis	IniMTT	FollUp	8	0.6875	1.66974	Increased	Tested	-0.238095	0.238095
Catabacter hongkongensis	EndMTT	FollUp	4	0.345231	7.68658	Decreased	Tested	0.466667	0.466667
Catenibacterium mitsuokai	Baseline	Vanco	0	0.179712	5.95507	Decreased	Tested	1	1
Catenibacterium mitsuokai	Baseline	IniMTT	0	0.179712	5.95507	Decreased	Tested	1	1
Catenibacterium mitsuokai	Baseline	EndMTT	0	0.179712	5.6055	Decreased	Tested	1	1
Catenibacterium mitsuokai	Baseline	FollUp	1	0.654721	0.731351	Increased	Tested	-0.333333	0.333333
Catenibacterium mitsuokai	Vanco	IniMTT			0	No change	Identical Values
Catenibacterium mitsuokai	Vanco	EndMTT	0	0.317311	0.329922	Increased	Tested	-1	1
Catenibacterium mitsuokai	Vanco	FollUp	0	0.317311	6.31062	Increased	Tested	-1	1
Catenibacterium mitsuokai	IniMTT	EndMTT	0	0.317311	0.329922	Increased	Tested	-1	1
Catenibacterium mitsuokai	IniMTT	FollUp	0	0.317311	6.31062	Increased	Tested	-1	1
Catenibacterium mitsuokai	EndMTT	FollUp	0	0.317311	6.00049	Increased	Tested	-1	1
Catenibacterium_u_s	Baseline	Vanco	2	0.09375	11.4805	Decreased	Tested	0.809524	0.809524
Catenibacterium_u_s	Baseline	IniMTT	2	0.138011	11.4435	Decreased	Tested	0.733333	0.733333
Catenibacterium_u_s	Baseline	EndMTT	5	0.3125	7.95804	Decreased	Tested	0.52381	0.52381
Catenibacterium_u_s	Baseline	FollUp	5	0.500184	1.2411	Decreased	Tested	0.333333	0.333333
Catenibacterium_u_s	Vanco	IniMTT	10.5	1	0.0331731	Increased	Tested	0	0
Catenibacterium_u_s	Vanco	EndMTT	4	0.21875	3.15972	Increased	Tested	-0.619048	0.619048
Catenibacterium_u_s	Vanco	FollUp	0	0.0431144	9.18493	Increased	Tested	-1	1
Catenibacterium_u_s	IniMTT	EndMTT	3.5	0.15625	3.12758	Increased	Tested	-0.666667	0.666667
Catenibacterium_u_s	IniMTT	FollUp	0	0.0678892	9.1548	Increased	Tested	-1	1
Catenibacterium_u_s	EndMTT	FollUp	6	0.68583	6.22181	Increased	Tested	-0.2	0.2
Chitinophaga silvisoli	Baseline	Vanco	0	0.317311	1.66599	Increased	Tested	-1	1
Chitinophaga silvisoli	Baseline	IniMTT	0	0.317311	0.477029	Decreased	Tested	1	1
Chitinophaga silvisoli	Baseline	EndMTT	0	0.317311	0.477029	Decreased	Tested	1	1
Chitinophaga silvisoli	Baseline	FollUp	0	0.317311	0.477029	Decreased	Tested	1	1
Chitinophaga silvisoli	Vanco	IniMTT	0	0.179712	2.17933	Decreased	Tested	1	1
Chitinophaga silvisoli	Vanco	EndMTT	0	0.179712	2.17933	Decreased	Tested	1	1
Chitinophaga silvisoli	Vanco	FollUp	0	0.179712	2.17933	Decreased	Tested	1	1
Chitinophaga silvisoli	IniMTT	EndMTT			0	No change	Identical Values
Chitinophaga silvisoli	IniMTT	FollUp			0	No change	Identical Values
Chitinophaga silvisoli	EndMTT	FollUp			0	No change	Identical Values
Christensenella minuta	Baseline	Vanco	4	0.345231	9.06201	Decreased	Tested	0.466667	0.466667
Christensenella minuta	Baseline	IniMTT	5	0.500184	8.96504	Decreased	Tested	0.333333	0.333333
Christensenella minuta	Baseline	EndMTT	9	0.84375	3.93843	Increased	Tested	-0.142857	0.142857
Christensenella minuta	Baseline	FollUp	4	0.345231	4.14481	Decreased	Tested	0.466667	0.466667
Christensenella minuta	Vanco	IniMTT	7	0.892738	0.0889158	Increased	Tested	0.0666667	0.0666667
Christensenella minuta	Vanco	EndMTT	0	0.03125	11.9202	Increased	Tested	-1	1
Christensenella minuta	Vanco	FollUp	3	0.224916	4.50863	Increased	Tested	-0.6	0.6
Christensenella minuta	IniMTT	EndMTT	8	0.6875	11.8418	Increased	Tested	-0.238095	0.238095
Christensenella minuta	IniMTT	FollUp	6	0.68583	4.42365	Increased	Tested	-0.2	0.2
Christensenella minuta	EndMTT	FollUp	5	0.3125	8.41465	Decreased	Tested	0.52381	0.52381
Christensenella timonensis	Baseline	Vanco	0	0.108809	0.665382	Decreased	Tested	1	1
Christensenella timonensis	Baseline	IniMTT	0	0.108809	0.665382	Decreased	Tested	1	1
Christensenella timonensis	Baseline	EndMTT	3	1	0.51455	Increased	Tested	0	0
Christensenella timonensis	Baseline	FollUp	2.5	0.357273	0.491465	Decreased	Tested	0.5	0.5
Christensenella timonensis	Vanco	IniMTT	1.5	1	0	No change	Tested	0	0
Christensenella timonensis	Vanco	EndMTT	0	0.317311	1.17213	Increased	Tested	-1	1
Christensenella timonensis	Vanco	FollUp	2	0.563703	0.172767	Increased	Tested	-0.333333	0.333333
Christensenella timonensis	IniMTT	EndMTT	1	0.654721	1.17213	Increased	Tested	-0.333333	0.333333
Christensenella timonensis	IniMTT	FollUp	0	0.317311	0.172767	Increased	Tested	-1	1
Christensenella timonensis	EndMTT	FollUp	3	1	1.01122	Decreased	Tested	0	0
Citrobacter freundii	Baseline	Vanco	0	0.10247	13.1988	Increased	Tested	-1	1
Citrobacter freundii	Baseline	IniMTT	0	0.10247	4.30073	Increased	Tested	-1	1
Citrobacter freundii	Baseline	EndMTT	0	0.317311	0.17247	Increased	Tested	-1	1
Citrobacter freundii	Baseline	FollUp			0	No change	Identical Values
Citrobacter freundii	Vanco	IniMTT	1	0.144127	10.2511	Decreased	Tested	0.8	0.8
Citrobacter freundii	Vanco	EndMTT	0	0.108809	15.0071	Decreased	Tested	1	1
Citrobacter freundii	Vanco	FollUp	0	0.10247	15.2058	Decreased	Tested	1	1
Citrobacter freundii	IniMTT	EndMTT	0	0.179712	4.31379	Decreased	Tested	1	1
Citrobacter freundii	IniMTT	FollUp	0	0.10247	4.49401	Decreased	Tested	1	1
Citrobacter freundii	EndMTT	FollUp	0	0.317311	0.172767	Decreased	Tested	1	1
Citrobacter freundii complex	Baseline	Vanco	0	0.179712	15.6691	Increased	Tested	-1	1
Citrobacter freundii complex	Baseline	IniMTT	0	0.179712	5.0115	Increased	Tested	-1	1
Citrobacter freundii complex	Baseline	EndMTT	0	0.317311	0.474764	Increased	Tested	-1	1
Citrobacter freundii complex	Baseline	FollUp			0	No change	Identical Values
Citrobacter freundii complex	Vanco	IniMTT	0	0.179712	12.6379	Decreased	Tested	1	1
Citrobacter freundii complex	Vanco	EndMTT	0	0.179712	18.0176	Decreased	Tested	1	1
Citrobacter freundii complex	Vanco	FollUp	0	0.179712	18.5805	Decreased	Tested	1	1
Citrobacter freundii complex	IniMTT	EndMTT	1	0.654721	4.77609	Decreased	Tested	0.333333	0.333333
Citrobacter freundii complex	IniMTT	FollUp	0	0.179712	5.2759	Decreased	Tested	1	1
Citrobacter freundii complex	EndMTT	FollUp	0	0.317311	0.477029	Decreased	Tested	1	1
Clostridia_u_s	Baseline	Vanco	5	0.3125	24.4399	Decreased	Tested	0.52381	0.52381
Clostridia_u_s	Baseline	IniMTT	4	0.21875	14.9903	Increased	Tested	-0.619048	0.619048
Clostridia_u_s	Baseline	EndMTT	5	0.3125	11.4288	Increased	Tested	-0.52381	0.52381
Clostridia_u_s	Baseline	FollUp	7	0.5625	7.66019	Increased	Tested	-0.333333	0.333333
Clostridia_u_s	Vanco	IniMTT	6	0.4375	31.6861	Increased	Tested	-0.428571	0.428571
Clostridia_u_s	Vanco	EndMTT	2	0.09375	28.8241	Increased	Tested	-0.809524	0.809524
Clostridia_u_s	Vanco	FollUp	6	0.4375	25.7957	Increased	Tested	-0.428571	0.428571
Clostridia_u_s	IniMTT	EndMTT	7	0.5625	4.18946	Decreased	Tested	0.333333	0.333333
Clostridia_u_s	IniMTT	FollUp	6	0.4375	8.62265	Decreased	Tested	0.428571	0.428571
Clostridia_u_s	EndMTT	FollUp	7	0.5625	4.25494	Decreased	Tested	0.333333	0.333333
Clostridiaceae_u_s	Baseline	Vanco	0	0.03125	23.5176	Decreased	Tested	1	1
Clostridiaceae_u_s	Baseline	IniMTT	7	0.5625	4.58075	Decreased	Tested	0.333333	0.333333
Clostridiaceae_u_s	Baseline	EndMTT	6	0.4375	9.43303	Increased	Tested	-0.428571	0.428571
Clostridiaceae_u_s	Baseline	FollUp	5	0.3125	11.7081	Increased	Tested	-0.52381	0.52381
Clostridiaceae_u_s	Vanco	IniMTT	1	0.0796158	15.3313	Increased	Tested	-0.866667	0.866667
Clostridiaceae_u_s	Vanco	EndMTT	0	0.03125	26.6769	Increased	Tested	-1	1
Clostridiaceae_u_s	Vanco	FollUp	0	0.03125	28.5188	Increased	Tested	-1	1
Clostridiaceae_u_s	IniMTT	EndMTT	4	0.21875	13.4	Increased	Tested	-0.619048	0.619048
Clostridiaceae_u_s	IniMTT	FollUp	1	0.0625	15.5754	Increased	Tested	-0.904762	0.904762
Clostridiaceae_u_s	EndMTT	FollUp	9	0.84375	2.51199	Increased	Tested	-0.142857	0.142857
Lachnospiraceae_u_s	Baseline	Vanco	0	0.03125	100.875	Decreased	Tested	1	1
Lachnospiraceae_u_s	Baseline	IniMTT	9	0.84375	64.4496	Decreased	Tested	0.142857	0.142857
Lachnospiraceae_u_s	Baseline	EndMTT	4	0.21875	10.1487	Decreased	Tested	0.619048	0.619048
Lachnospiraceae_u_s	Baseline	FollUp	10	1	14.0805	Increased	Tested	-0.047619	0.047619
Lachnospiraceae_u_s	Vanco	IniMTT	8	0.6875	18.1335	Increased	Tested	-0.238095	0.238095
Lachnospiraceae_u_s	Vanco	EndMTT	2	0.09375	45.1657	Increased	Tested	-0.809524	0.809524
Lachnospiraceae_u_s	Vanco	FollUp	2	0.09375	57.2275	Increased	Tested	-0.809524	0.809524
Lachnospiraceae_u_s	IniMTT	EndMTT	10	1	33.0198	Increased	Tested	-0.047619	0.047619
Lachnospiraceae_u_s	IniMTT	FollUp	8	0.6875	47.7533	Increased	Tested	-0.238095	0.238095
Lachnospiraceae_u_s	EndMTT	FollUp	4	0.21875	21.9968	Increased	Tested	-0.619048	0.619048
Hungatella hathewayi	Baseline	Vanco	1	0.0625	10.6769	Decreased	Tested	0.904762	0.904762
Hungatella hathewayi	Baseline	IniMTT	9	0.84375	7.85528	Decreased	Tested	0.142857	0.142857
Hungatella hathewayi	Baseline	EndMTT	8	0.6875	2.81586	Increased	Tested	-0.238095	0.238095
Hungatella hathewayi	Baseline	FollUp	10	1	3.81648	Increased	Tested	-0.047619	0.047619
Hungatella hathewayi	Vanco	IniMTT	9	0.84375	2.54944	Increased	Tested	-0.142857	0.142857
Hungatella hathewayi	Vanco	EndMTT	3	0.15625	12.1911	Increased	Tested	-0.714286	0.714286
Hungatella hathewayi	Vanco	FollUp	6	0.68583	13.0952	Increased	Tested	-0.2	0.2
Hungatella hathewayi	IniMTT	EndMTT	3	0.15625	9.89394	Increased	Tested	-0.714286	0.714286
Hungatella hathewayi	IniMTT	FollUp	5	0.3125	10.8217	Increased	Tested	-0.52381	0.52381
Hungatella hathewayi	EndMTT	FollUp	10	1	1.02962	Increased	Tested	-0.047619	0.047619
Clostridium_u_s	Baseline	Vanco	2	0.09375	43.7262	Decreased	Tested	0.809524	0.809524
Clostridium_u_s	Baseline	IniMTT	8	0.6875	1.0767	Decreased	Tested	-0.238095	0.238095
Clostridium_u_s	Baseline	EndMTT	9	0.84375	4.3889	Decreased	Tested	0.142857	0.142857
Clostridium_u_s	Baseline	FollUp	9	0.84375	0.0838514	Increased	Tested	0.142857	0.142857
Clostridium_u_s	Vanco	IniMTT	7	0.5625	29.6741	Increased	Tested	-0.333333	0.333333
Clostridium_u_s	Vanco	EndMTT	4	0.21875	27.3696	Increased	Tested	-0.619048	0.619048
Clostridium_u_s	Vanco	FollUp	4	0.21875	30.4816	Increased	Tested	-0.619048	0.619048
Clostridium_u_s	IniMTT	EndMTT	6	0.4375	3.27692	Decreased	Tested	0.428571	0.428571
Clostridium_u_s	IniMTT	FollUp	7	0.5625	1.14819	Increased	Tested	0.333333	0.333333
Clostridium_u_s	EndMTT	FollUp	10	1	4.2847	Increased	Tested	-0.047619	0.047619
Enterocloster aldensis	Baseline	Vanco	5	0.500184	5.89226	Decreased	Tested	0.333333	0.333333
Enterocloster aldensis	Baseline	IniMTT	10	1	0.0663154	Increased	Tested	-0.047619	0.047619
Enterocloster aldensis	Baseline	EndMTT	4	0.715001	3.3046	Increased	Tested	-0.2	0.2
Enterocloster aldensis	Baseline	FollUp	6	0.68583	2.67865	Decreased	Tested	0.2	0.2
Enterocloster aldensis	Vanco	IniMTT	6	0.4375	5.62702	Increased	Tested	-0.428571	0.428571
Enterocloster aldensis	Vanco	EndMTT	5	0.500184	8.68511	Increased	Tested	-0.333333	0.333333
Enterocloster aldensis	Vanco	FollUp	6	0.68583	3.03479	Increased	Tested	-0.2	0.2
Enterocloster aldensis	IniMTT	EndMTT	8	0.6875	3.24044	Increased	Tested	-0.238095	0.238095
Enterocloster aldensis	IniMTT	FollUp	9	0.84375	2.74678	Decreased	Tested	0.142857	0.142857
Enterocloster aldensis	EndMTT	FollUp	1	0.0796158	6.18773	Decreased	Tested	0.866667	0.866667
Enterocloster asparagiformis	Baseline	Vanco	0	0.0678892	6.42535	Decreased	Tested	1	1
Enterocloster asparagiformis	Baseline	IniMTT	0	0.0678892	6.58024	Decreased	Tested	1	1
Enterocloster asparagiformis	Baseline	EndMTT	7	0.892738	0.254116	Increased	Tested	0.0666667	0.0666667
Enterocloster asparagiformis	Baseline	FollUp	1	0.144127	3.34591	Decreased	Tested	0.8	0.8
Enterocloster asparagiformis	Vanco	IniMTT	1	0.654721	0.145533	Decreased	Tested	0.333333	0.333333
Enterocloster asparagiformis	Vanco	EndMTT	0	0.179712	6.2762	Increased	Tested	-1	1
Enterocloster asparagiformis	Vanco	FollUp	1	0.285049	2.89353	Increased	Tested	-0.666667	0.666667
Enterocloster asparagiformis	IniMTT	EndMTT	0	0.108809	6.4124	Increased	Tested	-1	1
Enterocloster asparagiformis	IniMTT	FollUp	0	0.108809	3.03464	Increased	Tested	-1	1
Enterocloster asparagiformis	EndMTT	FollUp	3	0.465209	3.60919	Decreased	Tested	0.4	0.4
Clostridium baratii	Baseline	Vanco	0	0.317311	4.42622	Decreased	Tested	1	1
Clostridium baratii	Baseline	IniMTT	0	0.317311	0.0970941	Increased	Tested	-1	1
Clostridium baratii	Baseline	EndMTT	0	0.317311	1.59834	Decreased	Tested	1	1
Clostridium baratii	Baseline	FollUp	0	0.317311	1.67722	Decreased	Tested	1	1
Clostridium baratii	Vanco	IniMTT	0	0.317311	4.33159	Increased	Tested	-1	1
Clostridium baratii	Vanco	EndMTT	0	0.317311	2.70802	Increased	Tested	-1	1
Clostridium baratii	Vanco	FollUp	0	0.317311	2.63248	Increased	Tested	-1	1
Clostridium baratii	IniMTT	EndMTT	0	0.317311	1.69708	Decreased	Tested	1	1
Clostridium baratii	IniMTT	FollUp	0	0.317311	1.77604	Decreased	Tested	1	1
Clostridium baratii	EndMTT	FollUp	0	0.317311	0.0776421	Decreased	Tested	1	1
Enterocloster bolteae	Baseline	Vanco	1	0.0796158	21.2657	Decreased	Tested	0.866667	0.866667
Enterocloster bolteae	Baseline	IniMTT	0	0.0431144	25.0259	Decreased	Tested	1	1
Enterocloster bolteae	Baseline	EndMTT	2	0.138011	15.0215	Decreased	Tested	0.733333	0.733333
Enterocloster bolteae	Baseline	FollUp	0	0.0431144	19.2891	Decreased	Tested	1	1
Enterocloster bolteae	Vanco	IniMTT	3	0.465209	3.1008	Decreased	Tested	0.4	0.4
Enterocloster bolteae	Vanco	EndMTT	5	1	5.14916	Increased	Tested	0	0
Enterocloster bolteae	Vanco	FollUp	4	0.715001	1.62991	Increased	Tested	-0.2	0.2
Enterocloster bolteae	IniMTT	EndMTT	1	0.285049	8.00184	Increased	Tested	-0.666667	0.666667
Enterocloster bolteae	IniMTT	FollUp	5	0.500184	4.58843	Increased	Tested	-0.333333	0.333333
Enterocloster bolteae	EndMTT	FollUp	6	0.68583	3.7103	Decreased	Tested	0.2	0.2
Clostridium celatum	Baseline	Vanco	0	0.317311	5.39206	Decreased	Tested	1	1
Clostridium celatum	Baseline	IniMTT	0	0.317311	5.39206	Decreased	Tested	1	1
Clostridium celatum	Baseline	EndMTT	0	0.317311	2.7965	Decreased	Tested	1	1
Clostridium celatum	Baseline	FollUp	0	0.317311	0.53733	Increased	Tested	-1	1
Clostridium celatum	Vanco	IniMTT			0	No change	Identical Values
Clostridium celatum	Vanco	EndMTT	0	0.317311	2.46277	Increased	Tested	-1	1
Clostridium celatum	Vanco	FollUp	0	0.317311	5.62603	Increased	Tested	-1	1
Clostridium celatum	IniMTT	EndMTT	0	0.317311	2.46277	Increased	Tested	-1	1
Clostridium celatum	IniMTT	FollUp	0	0.317311	5.62603	Increased	Tested	-1	1
Clostridium celatum	EndMTT	FollUp	0	0.317311	3.24314	Increased	Tested	-1	1
Enterocloster citroniae	Baseline	Vanco	2	0.273322	3.23117	Decreased	Tested	0.6	0.6
Enterocloster citroniae	Baseline	IniMTT	4	0.715001	1.03669	Decreased	Tested	0.2	0.2
Enterocloster citroniae	Baseline	EndMTT	4	0.715001	1.81325	Increased	Tested	-0.2	0.2
Enterocloster citroniae	Baseline	FollUp	4	0.715001	1.19583	Increased	Tested	-0.2	0.2
Enterocloster citroniae	Vanco	IniMTT	1	0.654721	2.1258	Increased	Tested	-0.333333	0.333333
Enterocloster citroniae	Vanco	EndMTT	1	0.285049	4.88653	Increased	Tested	-0.666667	0.666667
Enterocloster citroniae	Vanco	FollUp	1	0.285049	4.28844	Increased	Tested	-0.666667	0.666667
Enterocloster citroniae	IniMTT	EndMTT	1	0.654721	2.82069	Increased	Tested	-0.333333	0.333333
Enterocloster citroniae	IniMTT	FollUp	1	0.654721	2.20961	Increased	Tested	-0.333333	0.333333
Enterocloster citroniae	EndMTT	FollUp	0	0.179712	0.628817	Decreased	Tested	1	1
Enterocloster clostridioformis	Baseline	Vanco	5	0.500184	13.773	Decreased	Tested	0.333333	0.333333
Enterocloster clostridioformis	Baseline	IniMTT	0	0.0431144	22.833	Decreased	Tested	1	1
Enterocloster clostridioformis	Baseline	EndMTT	3	0.224916	9.65946	Decreased	Tested	0.6	0.6
Enterocloster clostridioformis	Baseline	FollUp	1	0.0796158	13.6545	Decreased	Tested	0.866667	0.866667
Enterocloster clostridioformis	Vanco	IniMTT	2	0.273322	7.96329	Decreased	Tested	0.6	0.6
Enterocloster clostridioformis	Vanco	EndMTT	7	0.892738	3.61554	Increased	Tested	-0.0666667	0.0666667
Enterocloster clostridioformis	Vanco	FollUp	7	0.892738	0.104147	Increased	Tested	-0.0666667	0.0666667
Enterocloster clostridioformis	IniMTT	EndMTT	1	0.285049	10.7248	Increased	Tested	-0.666667	0.666667
Enterocloster clostridioformis	IniMTT	FollUp	2	0.138011	7.47239	Increased	Tested	-0.733333	0.733333
Enterocloster clostridioformis	EndMTT	FollUp	6	0.68583	3.64311	Decreased	Tested	0.2	0.2
Clostridium cuniculi	Baseline	Vanco			0	No change	Identical Values
Clostridium cuniculi	Baseline	IniMTT	0	0.317311	0.17247	Increased	Tested	-1	1
Clostridium cuniculi	Baseline	EndMTT			0	No change	Identical Values
Clostridium cuniculi	Baseline	FollUp			0	No change	Identical Values
Clostridium cuniculi	Vanco	IniMTT	0	0.317311	0.17247	Increased	Tested	-1	1
Clostridium cuniculi	Vanco	EndMTT			0	No change	Identical Values
Clostridium cuniculi	Vanco	FollUp			0	No change	Identical Values
Clostridium cuniculi	IniMTT	EndMTT	0	0.317311	0.172767	Decreased	Tested	1	1
Clostridium cuniculi	IniMTT	FollUp	0	0.317311	0.172767	Decreased	Tested	1	1
Clostridium cuniculi	EndMTT	FollUp			0	No change	Identical Values
[Clostridium] hylemonae	Baseline	Vanco	1	0.654721	1.0971	Decreased	Tested	0.333333	0.333333
[Clostridium] hylemonae	Baseline	IniMTT	0	0.179712	4.2844	Increased	Tested	-1	1
[Clostridium] hylemonae	Baseline	EndMTT	1	0.285049	2.19596	Increased	Tested	-0.666667	0.666667
[Clostridium] hylemonae	Baseline	FollUp	3	1	2.05521	Decreased	Tested	0	0
[Clostridium] hylemonae	Vanco	IniMTT	2	0.59298	5.3231	Increased	Tested	-0.333333	0.333333
[Clostridium] hylemonae	Vanco	EndMTT	1	0.285049	3.25733	Increased	Tested	-0.666667	0.666667
[Clostridium] hylemonae	Vanco	FollUp	1	0.654721	0.94771	Decreased	Tested	0.333333	0.333333
[Clostridium] hylemonae	IniMTT	EndMTT	2	0.59298	2.18192	Decreased	Tested	0.333333	0.333333
[Clostridium] hylemonae	IniMTT	FollUp	1	0.285049	6.62338	Decreased	Tested	0.666667	0.666667
[Clostridium] hylemonae	EndMTT	FollUp	0	0.108809	4.34662	Decreased	Tested	1	1
[Clostridium] innocuum	Baseline	Vanco	5	1	0.205572	Decreased	Tested	0	0
[Clostridium] innocuum	Baseline	IniMTT	3	0.224916	17.0047	Increased	Tested	-0.6	0.6
[Clostridium] innocuum	Baseline	EndMTT	6	0.68583	6.75288	Increased	Tested	-0.2	0.2
[Clostridium] innocuum	Baseline	FollUp	5	1	2.79663	Decreased	Tested	0	0
[Clostridium] innocuum	Vanco	IniMTT	5	0.500184	17.1749	Increased	Tested	-0.333333	0.333333
[Clostridium] innocuum	Vanco	EndMTT	1	0.285049	6.94418	Increased	Tested	-0.666667	0.666667
[Clostridium] innocuum	Vanco	FollUp	1	0.654721	2.58574	Decreased	Tested	0.333333	0.333333
[Clostridium] innocuum	IniMTT	EndMTT	4	0.345231	12.3523	Decreased	Tested	0.466667	0.466667
[Clostridium] innocuum	IniMTT	FollUp	2	0.138011	23.8583	Decreased	Tested	0.733333	0.733333
[Clostridium] innocuum	EndMTT	FollUp	1	0.285049	10.2411	Decreased	Tested	0.666667	0.666667
Ruminococcaceae_u_s	Baseline	Vanco	3	0.15625	56.4492	Decreased	Tested	0.714286	0.714286
Ruminococcaceae_u_s	Baseline	IniMTT	7	0.5625	29.4453	Decreased	Tested	0.333333	0.333333
Ruminococcaceae_u_s	Baseline	EndMTT	9	0.84375	13.5284	Increased	Tested	-0.142857	0.142857
Ruminococcaceae_u_s	Baseline	FollUp	3	0.15625	15.7537	Increased	Tested	-0.714286	0.714286
Ruminococcaceae_u_s	Vanco	IniMTT	6	0.4375	17.2605	Increased	Tested	-0.428571	0.428571
Ruminococcaceae_u_s	Vanco	EndMTT	0	0.03125	44.7287	Increased	Tested	-1	1
Ruminococcaceae_u_s	Vanco	FollUp	1	0.0625	46.151	Increased	Tested	-0.904762	0.904762
Ruminococcaceae_u_s	IniMTT	EndMTT	3	0.15625	33.1984	Increased	Tested	-0.714286	0.714286
Ruminococcaceae_u_s	IniMTT	FollUp	2	0.09375	34.9175	Increased	Tested	-0.809524	0.809524
Ruminococcaceae_u_s	EndMTT	FollUp	10	1	2.57339	Increased	Tested	0.047619	0.047619
Flavonifractor plautii	Baseline	Vanco	0	0.03125	24.6734	Decreased	Tested	1	1
Flavonifractor plautii	Baseline	IniMTT	10	1	0.977059	Increased	Tested	0.047619	0.047619
Flavonifractor plautii	Baseline	EndMTT	8	0.6875	10.3239	Increased	Tested	-0.238095	0.238095
Flavonifractor plautii	Baseline	FollUp	8	0.6875	5.68455	Increased	Tested	-0.238095	0.238095
Flavonifractor plautii	Vanco	IniMTT	3	0.15625	20.5741	Increased	Tested	-0.714286	0.714286
Flavonifractor plautii	Vanco	EndMTT	0	0.03125	28.0712	Increased	Tested	-1	1
Flavonifractor plautii	Vanco	FollUp	0	0.03125	24.35	Increased	Tested	-1	1
Flavonifractor plautii	IniMTT	EndMTT	7	0.5625	9.43911	Increased	Tested	-0.333333	0.333333
Flavonifractor plautii	IniMTT	FollUp	9	0.84375	4.75394	Increased	Tested	-0.142857	0.142857
Flavonifractor plautii	EndMTT	FollUp	7	0.5625	5.17349	Decreased	Tested	0.333333	0.333333
Clostridium perfringens	Baseline	Vanco			0	No change	Identical Values
Clostridium perfringens	Baseline	IniMTT			0	No change	Identical Values
Clostridium perfringens	Baseline	EndMTT	0	0.317311	4.0547	Increased	Tested	-1	1
Clostridium perfringens	Baseline	FollUp	0	0.317311	1.25429	Increased	Tested	-1	1
Clostridium perfringens	Vanco	IniMTT			0	No change	Identical Values
Clostridium perfringens	Vanco	EndMTT	0	0.317311	4.0547	Increased	Tested	-1	1
Clostridium perfringens	Vanco	FollUp	0	0.317311	1.25429	Increased	Tested	-1	1
Clostridium perfringens	IniMTT	EndMTT	0	0.317311	4.0547	Increased	Tested	-1	1
Clostridium perfringens	IniMTT	FollUp	0	0.317311	1.25429	Increased	Tested	-1	1
Clostridium perfringens	EndMTT	FollUp	0	0.317311	2.91875	Decreased	Tested	1	1
Clostridium phoceensis	Baseline	Vanco	0	0.0431144	21.5588	Decreased	Tested	1	1
Clostridium phoceensis	Baseline	IniMTT	9	0.84375	1.84341	Decreased	Tested	0.142857	0.142857
Clostridium phoceensis	Baseline	EndMTT	6	0.68583	1.26612	Decreased	Tested	0.2	0.2
Clostridium phoceensis	Baseline	FollUp	10	1	3.93141	Decreased	Tested	0.047619	0.047619
Clostridium phoceensis	Vanco	IniMTT	0	0.0678892	16.2188	Increased	Tested	-1	1
Clostridium phoceensis	Vanco	EndMTT	0	0.108809	16.6937	Increased	Tested	-1	1
Clostridium phoceensis	Vanco	FollUp	0	0.0678892	14.5011	Increased	Tested	-1	1
Clostridium phoceensis	IniMTT	EndMTT	4	0.715001	0.566841	Increased	Tested	-0.2	0.2
Clostridium phoceensis	IniMTT	FollUp	9	0.84375	2.0502	Decreased	Tested	0.142857	0.142857
Clostridium phoceensis	EndMTT	FollUp	9	0.84375	2.63196	Decreased	Tested	0.142857	0.142857
[Clostridium] saccharogumia	Baseline	Vanco	0	0.0832645	1.0014	Decreased	Tested	1	1
[Clostridium] saccharogumia	Baseline	IniMTT	0	0.0587817	1.1759	Decreased	Tested	1	1
[Clostridium] saccharogumia	Baseline	EndMTT	0	0.0587817	1.1759	Decreased	Tested	1	1
[Clostridium] saccharogumia	Baseline	FollUp	0	0.0587817	1.1759	Decreased	Tested	1	1
[Clostridium] saccharogumia	Vanco	IniMTT	0	0.317311	0.172767	Decreased	Tested	1	1
[Clostridium] saccharogumia	Vanco	EndMTT	0	0.317311	0.172767	Decreased	Tested	1	1
[Clostridium] saccharogumia	Vanco	FollUp	0	0.317311	0.172767	Decreased	Tested	1	1
[Clostridium] saccharogumia	IniMTT	EndMTT			0	No change	Identical Values
[Clostridium] saccharogumia	IniMTT	FollUp			0	No change	Identical Values
[Clostridium] saccharogumia	EndMTT	FollUp			0	No change	Identical Values
[Clostridium] scindens	Baseline	Vanco	1	0.144127	12.3885	Decreased	Tested	0.8	0.8
[Clostridium] scindens	Baseline	IniMTT	0	0.108809	12.6294	Decreased	Tested	1	1
[Clostridium] scindens	Baseline	EndMTT	0	0.108809	6.43897	Decreased	Tested	1	1
[Clostridium] scindens	Baseline	FollUp	0	0.108809	13.6741	Decreased	Tested	1	1
[Clostridium] scindens	Vanco	IniMTT	2	0.59298	0.214305	Decreased	Tested	0.333333	0.333333
[Clostridium] scindens	Vanco	EndMTT	1	0.285049	5.29373	Increased	Tested	-0.666667	0.666667
[Clostridium] scindens	Vanco	FollUp	2	0.59298	1.1439	Decreased	Tested	0.333333	0.333333
[Clostridium] scindens	IniMTT	EndMTT	1	0.654721	5.49625	Increased	Tested	-0.333333	0.333333
[Clostridium] scindens	IniMTT	FollUp	1	0.654721	0.927611	Decreased	Tested	0.333333	0.333333
[Clostridium] scindens	EndMTT	FollUp	0	0.179712	6.79747	Decreased	Tested	1	1
Clostridium saudiense	Baseline	Vanco	5	0.500184	7.03594	Decreased	Tested	0.333333	0.333333
Clostridium saudiense	Baseline	IniMTT	5	0.500184	1.7677	Decreased	Tested	0.333333	0.333333
Clostridium saudiense	Baseline	EndMTT	0	0.0431144	13.6853	Increased	Tested	-1	1
Clostridium saudiense	Baseline	FollUp	5	0.500184	6.36153	Increased	Tested	-0.333333	0.333333
Clostridium saudiense	Vanco	IniMTT	7	0.892738	4.92194	Increased	Tested	-0.0666667	0.0666667
Clostridium saudiense	Vanco	EndMTT	2	0.138011	19.3591	Increased	Tested	-0.733333	0.733333
Clostridium saudiense	Vanco	FollUp	5	0.500184	12.5168	Increased	Tested	-0.333333	0.333333
Clostridium saudiense	IniMTT	EndMTT	2	0.138011	15.1846	Increased	Tested	-0.733333	0.733333
Clostridium saudiense	IniMTT	FollUp	3	0.465209	7.98802	Increased	Tested	-0.4	0.4
Clostridium saudiense	EndMTT	FollUp	5	0.500184	8.48492	Decreased	Tested	0.333333	0.333333
Clostridium porci	Baseline	Vanco	0	0.0384339	1.19128	Decreased	Tested	1	1
Clostridium porci	Baseline	IniMTT	0	0.0393595	1.01675	Decreased	Tested	1	1
Clostridium porci	Baseline	EndMTT	6	0.68028	6.65683	Increased	Tested	-0.2	0.2
Clostridium porci	Baseline	FollUp	2	0.128978	0.842228	Decreased	Tested	0.733333	0.733333
Clostridium porci	Vanco	IniMTT	0	0.317311	0.17247	Increased	Tested	-1	1
Clostridium porci	Vanco	EndMTT	0	0.0655997	7.75571	Increased	Tested	-1	1
Clostridium porci	Vanco	FollUp	0	0.157299	0.344939	Increased	Tested	-1	1
Clostridium porci	IniMTT	EndMTT	0	0.0655997	7.59634	Increased	Tested	-1	1
Clostridium porci	IniMTT	FollUp	2	0.563703	0.172767	Increased	Tested	-0.333333	0.333333
Clostridium porci	EndMTT	FollUp	0	0.179712	8.03385	Decreased	Tested	1	1
[Clostridium] spiroforme	Baseline	Vanco	4	0.715001	5.60982	Decreased	Tested	0.2	0.2
[Clostridium] spiroforme	Baseline	IniMTT	7	0.892738	1.82141	Increased	Tested	-0.0666667	0.0666667
[Clostridium] spiroforme	Baseline	EndMTT	3	0.224916	9.11545	Increased	Tested	-0.6	0.6
[Clostridium] spiroforme	Baseline	FollUp	7	0.892738	0.234775	Increased	Tested	0.0666667	0.0666667
[Clostridium] spiroforme	Vanco	IniMTT	4	0.345231	7.03649	Increased	Tested	-0.466667	0.466667
[Clostridium] spiroforme	Vanco	EndMTT	2	0.138011	13.9431	Increased	Tested	-0.733333	0.733333
[Clostridium] spiroforme	Vanco	FollUp	2	0.59298	5.53414	Increased	Tested	-0.333333	0.333333
[Clostridium] spiroforme	IniMTT	EndMTT	1	0.144127	7.42935	Increased	Tested	-0.8	0.8
[Clostridium] spiroforme	IniMTT	FollUp	4	0.715001	1.61607	Decreased	Tested	0.2	0.2
[Clostridium] spiroforme	EndMTT	FollUp	2	0.273322	9.77138	Decreased	Tested	0.6	0.6
[Clostridium] symbiosum	Baseline	Vanco	3	0.224916	11.5238	Decreased	Tested	0.6	0.6
[Clostridium] symbiosum	Baseline	IniMTT	0	0.0431144	15.3336	Decreased	Tested	1	1
[Clostridium] symbiosum	Baseline	EndMTT	6	0.4375	4.05936	Decreased	Tested	0.428571	0.428571
[Clostridium] symbiosum	Baseline	FollUp	6	0.4375	0.685531	Decreased	Tested	0.428571	0.428571
[Clostridium] symbiosum	Vanco	IniMTT	3	1	3.41613	Decreased	Tested	0	0
[Clostridium] symbiosum	Vanco	EndMTT	3	0.465209	6.69314	Increased	Tested	-0.4	0.4
[Clostridium] symbiosum	Vanco	FollUp	5	0.500184	9.71835	Increased	Tested	-0.333333	0.333333
[Clostridium] symbiosum	IniMTT	EndMTT	0	0.179712	9.77533	Increased	Tested	-1	1
[Clostridium] symbiosum	IniMTT	FollUp	0	0.0678892	12.7006	Increased	Tested	-1	1
[Clostridium] symbiosum	EndMTT	FollUp	2	0.273322	3.24222	Increased	Tested	-0.6	0.6
Collinsella aerofaciens	Baseline	Vanco	0	0.0678892	20.6129	Decreased	Tested	1	1
Collinsella aerofaciens	Baseline	IniMTT	6	0.4375	12.2321	Decreased	Tested	0.428571	0.428571
Collinsella aerofaciens	Baseline	EndMTT	9	0.84375	1.27129	Decreased	Tested	0.142857	0.142857
Collinsella aerofaciens	Baseline	FollUp	10	1	0.80925	Increased	Tested	0.047619	0.047619
Collinsella aerofaciens	Vanco	IniMTT	7	0.5625	6.94851	Increased	Tested	-0.333333	0.333333
Collinsella aerofaciens	Vanco	EndMTT	0	0.03125	16.0361	Increased	Tested	-1	1
Collinsella aerofaciens	Vanco	FollUp	3	0.15625	17.7611	Increased	Tested	-0.714286	0.714286
Collinsella aerofaciens	IniMTT	EndMTT	5	0.3125	9.7662	Increased	Tested	-0.52381	0.52381
Collinsella aerofaciens	IniMTT	FollUp	1	0.0625	11.62	Increased	Tested	-0.904762	0.904762
Collinsella aerofaciens	EndMTT	FollUp	9	0.84375	2.05442	Increased	Tested	-0.142857	0.142857
Collinsella intestinalis	Baseline	Vanco	0	0.179712	2.37293	Decreased	Tested	1	1
Collinsella intestinalis	Baseline	IniMTT	0	0.179712	2.37293	Decreased	Tested	1	1
Collinsella intestinalis	Baseline	EndMTT	0	0.179712	2.37293	Decreased	Tested	1	1
Collinsella intestinalis	Baseline	FollUp	0	0.179712	2.37293	Decreased	Tested	1	1
Collinsella intestinalis	Vanco	IniMTT			0	No change	Identical Values
Collinsella intestinalis	Vanco	EndMTT			0	No change	Identical Values
Collinsella intestinalis	Vanco	FollUp			0	No change	Identical Values
Collinsella intestinalis	IniMTT	EndMTT			0	No change	Identical Values
Collinsella intestinalis	IniMTT	FollUp			0	No change	Identical Values
Collinsella intestinalis	EndMTT	FollUp			0	No change	Identical Values
Collinsella_u_s	Baseline	Vanco	5	0.3125	17.7332	Decreased	Tested	0.52381	0.52381
Collinsella_u_s	Baseline	IniMTT	8	0.6875	8.36175	Decreased	Tested	0.238095	0.238095
Collinsella_u_s	Baseline	EndMTT	10	1	4.8623	Increased	Tested	0.047619	0.047619
Collinsella_u_s	Baseline	FollUp	10	1	7.29519	Increased	Tested	-0.047619	0.047619
Collinsella_u_s	Vanco	IniMTT	7	0.5625	7.95988	Increased	Tested	-0.333333	0.333333
Collinsella_u_s	Vanco	EndMTT	0	0.03125	19.1921	Increased	Tested	-1	1
Collinsella_u_s	Vanco	FollUp	3	0.15625	21.2585	Increased	Tested	-0.714286	0.714286
Collinsella_u_s	IniMTT	EndMTT	5	0.3125	12.2036	Increased	Tested	-0.52381	0.52381
Collinsella_u_s	IniMTT	FollUp	3	0.15625	14.4488	Increased	Tested	-0.714286	0.714286
Collinsella_u_s	EndMTT	FollUp	8	0.6875	2.55722	Increased	Tested	-0.238095	0.238095
Collinsella stercoris	Baseline	Vanco	1	0.654721	4.02531	Decreased	Tested	0.333333	0.333333
Collinsella stercoris	Baseline	IniMTT	0	0.317311	4.20503	Decreased	Tested	1	1
Collinsella stercoris	Baseline	EndMTT	4	0.712702	3.50179	Decreased	Tested	-0.2	0.2
Collinsella stercoris	Baseline	FollUp	3	1	3.68152	Decreased	Tested	0	0
Collinsella stercoris	Vanco	IniMTT	0	0.317311	0.172767	Decreased	Tested	1	1
Collinsella stercoris	Vanco	EndMTT	0	0.179712	0.503259	Increased	Tested	-1	1
Collinsella stercoris	Vanco	FollUp	0	0.317311	0.330492	Increased	Tested	-1	1
Collinsella stercoris	IniMTT	EndMTT	0	0.10247	0.674861	Increased	Tested	-1	1
Collinsella stercoris	IniMTT	FollUp	0	0.179712	0.502391	Increased	Tested	-1	1
Collinsella stercoris	EndMTT	FollUp	0	0.317311	0.173641	Decreased	Tested	1	1
Coprobacillus cateniformis	Baseline	Vanco	5	1	2.87925	Increased	Tested	0	0
Coprobacillus cateniformis	Baseline	IniMTT	9	0.84375	1.87077	Increased	Tested	-0.142857	0.142857
Coprobacillus cateniformis	Baseline	EndMTT	0	0.03125	20.7629	Increased	Tested	-1	1
Coprobacillus cateniformis	Baseline	FollUp	3	0.224916	6.22735	Increased	Tested	-0.6	0.6
Coprobacillus cateniformis	Vanco	IniMTT	5	0.500184	1.03837	Decreased	Tested	-0.333333	0.333333
Coprobacillus cateniformis	Vanco	EndMTT	5	0.3125	18.4139	Increased	Tested	-0.52381	0.52381
Coprobacillus cateniformis	Vanco	FollUp	6	0.68583	3.44736	Increased	Tested	-0.2	0.2
Coprobacillus cateniformis	IniMTT	EndMTT	3	0.15625	19.2523	Increased	Tested	-0.714286	0.714286
Coprobacillus cateniformis	IniMTT	FollUp	6	0.68583	4.43963	Increased	Tested	-0.2	0.2
Coprobacillus cateniformis	EndMTT	FollUp	0	0.0431144	18.3444	Decreased	Tested	1	1
Coprobacillus_u_s	Baseline	Vanco	4	0.21875	19.7857	Decreased	Tested	0.619048	0.619048
Coprobacillus_u_s	Baseline	IniMTT	6	0.4375	13.0001	Decreased	Tested	0.428571	0.428571
Coprobacillus_u_s	Baseline	EndMTT	3	0.15625	12.8155	Increased	Tested	-0.714286	0.714286
Coprobacillus_u_s	Baseline	FollUp	7	0.5625	2.52779	Increased	Tested	-0.333333	0.333333
Coprobacillus_u_s	Vanco	IniMTT	5	0.500184	5.66476	Increased	Tested	-0.333333	0.333333
Coprobacillus_u_s	Vanco	EndMTT	0	0.03125	27.2163	Increased	Tested	-1	1
Coprobacillus_u_s	Vanco	FollUp	1	0.0625	18.6278	Increased	Tested	-0.904762	0.904762
Coprobacillus_u_s	IniMTT	EndMTT	2	0.09375	22.8457	Increased	Tested	-0.809524	0.809524
Coprobacillus_u_s	IniMTT	FollUp	6	0.4375	13.7415	Increased	Tested	-0.428571	0.428571
Coprobacillus_u_s	EndMTT	FollUp	6	0.4375	11.7999	Decreased	Tested	0.428571	0.428571
Coprococcus catus	Baseline	Vanco	6	0.4375	1.55754	Decreased	Tested	0.428571	0.428571
Coprococcus catus	Baseline	IniMTT	5	0.500184	9.02019	Increased	Tested	-0.333333	0.333333
Coprococcus catus	Baseline	EndMTT	3	0.15625	24.5944	Increased	Tested	-0.714286	0.714286
Coprococcus catus	Baseline	FollUp	2	0.09375	22.4678	Increased	Tested	-0.809524	0.809524
Coprococcus catus	Vanco	IniMTT	8	0.6875	10.4155	Increased	Tested	-0.238095	0.238095
Coprococcus catus	Vanco	EndMTT	2	0.09375	25.7509	Increased	Tested	-0.809524	0.809524
Coprococcus catus	Vanco	FollUp	3	0.15625	23.6569	Increased	Tested	-0.714286	0.714286
Coprococcus catus	IniMTT	EndMTT	5	0.3125	17.1183	Increased	Tested	-0.52381	0.52381
Coprococcus catus	IniMTT	FollUp	4	0.21875	14.7809	Increased	Tested	-0.619048	0.619048
Coprococcus catus	EndMTT	FollUp	6	0.4375	2.82016	Decreased	Tested	0.428571	0.428571
Coprococcus comes	Baseline	Vanco	6	0.4375	3.32775	Decreased	Tested	0.428571	0.428571
Coprococcus comes	Baseline	IniMTT	6	0.4375	14.8049	Increased	Tested	-0.428571	0.428571
Coprococcus comes	Baseline	EndMTT	0	0.0431144	22.6614	Increased	Tested	-1	1
Coprococcus comes	Baseline	FollUp	0	0.0431144	25.9812	Increased	Tested	-1	1
Coprococcus comes	Vanco	IniMTT	8	0.6875	17.5487	Increased	Tested	-0.238095	0.238095
Coprococcus comes	Vanco	EndMTT	4	0.21875	25.1521	Increased	Tested	-0.619048	0.619048
Coprococcus comes	Vanco	FollUp	2	0.09375	28.365	Increased	Tested	-0.809524	0.809524
Coprococcus comes	IniMTT	EndMTT	5	0.3125	9.22178	Increased	Tested	-0.52381	0.52381
Coprococcus comes	IniMTT	FollUp	7	0.5625	13.1185	Increased	Tested	-0.333333	0.333333
Coprococcus comes	EndMTT	FollUp	6	0.68583	4.29255	Increased	Tested	-0.2	0.2
Coprococcus eutactus	Baseline	Vanco			0	No change	Identical Values
Coprococcus eutactus	Baseline	IniMTT			0	No change	Identical Values
Coprococcus eutactus	Baseline	EndMTT			0	No change	Identical Values
Coprococcus eutactus	Baseline	FollUp			0	No change	Identical Values
Coprococcus eutactus	Vanco	IniMTT			0	No change	Identical Values
Coprococcus eutactus	Vanco	EndMTT			0	No change	Identical Values
Coprococcus eutactus	Vanco	FollUp			0	No change	Identical Values
Coprococcus eutactus	IniMTT	EndMTT			0	No change	Identical Values
Coprococcus eutactus	IniMTT	FollUp			0	No change	Identical Values
Coprococcus eutactus	EndMTT	FollUp			0	No change	Identical Values
Coprococcus_u_s	Baseline	Vanco	0	0.0421682	12.2268	Decreased	Tested	1	1
Coprococcus_u_s	Baseline	IniMTT	1	0.144127	17.8161	Decreased	Tested	0.8	0.8
Coprococcus_u_s	Baseline	EndMTT	1	0.654721	6.32535	Decreased	Tested	0.333333	0.333333
Coprococcus_u_s	Baseline	FollUp	4	0.715001	5.914	Decreased	Tested	0.2	0.2
Coprococcus_u_s	Vanco	IniMTT	4	0.712702	4.98035	Decreased	Tested	-0.2	0.2
Coprococcus_u_s	Vanco	EndMTT	4	0.343028	5.25848	Increased	Tested	-0.466667	0.466667
Coprococcus_u_s	Vanco	FollUp	4	0.343028	5.62501	Increased	Tested	-0.466667	0.466667
Coprococcus_u_s	IniMTT	EndMTT	1	0.144127	9.75309	Increased	Tested	-0.8	0.8
Coprococcus_u_s	IniMTT	FollUp	1	0.144127	10.1022	Increased	Tested	-0.8	0.8
Coprococcus_u_s	EndMTT	FollUp	2	0.59298	0.386879	Increased	Tested	-0.333333	0.333333
Corynebacterium argentoratense	Baseline	Vanco	1	0.654721	3.32313	Increased	Tested	-0.333333	0.333333
Corynebacterium argentoratense	Baseline	IniMTT	1	0.654721	0.100617	Increased	Tested	-0.333333	0.333333
Corynebacterium argentoratense	Baseline	EndMTT	1	0.654721	0.913223	Increased	Tested	-0.333333	0.333333
Corynebacterium argentoratense	Baseline	FollUp	1	0.654721	0.598556	Decreased	Tested	0.333333	0.333333
Corynebacterium argentoratense	Vanco	IniMTT	0	0.317311	3.33328	Decreased	Tested	1	1
Corynebacterium argentoratense	Vanco	EndMTT	0	0.317311	2.49274	Decreased	Tested	1	1
Corynebacterium argentoratense	Vanco	FollUp	1	0.654721	4.05648	Decreased	Tested	0.333333	0.333333
Corynebacterium argentoratense	IniMTT	EndMTT	0	0.317311	0.813424	Increased	Tested	-1	1
Corynebacterium argentoratense	IniMTT	FollUp	1	0.654721	0.699878	Decreased	Tested	0.333333	0.333333
Corynebacterium argentoratense	EndMTT	FollUp	1	0.654721	1.52571	Decreased	Tested	0.333333	0.333333
Corynebacterium durum	Baseline	Vanco	4	0.21875	10.4561	Increased	Tested	-0.619048	0.619048
Corynebacterium durum	Baseline	IniMTT	7	0.5625	1.82976	Decreased	Tested	0.333333	0.333333
Corynebacterium durum	Baseline	EndMTT	3.5	0.15625	4.82593	Increased	Tested	-0.666667	0.666667
Corynebacterium durum	Baseline	FollUp	6	0.4375	0.540755	Increased	Tested	-0.428571	0.428571
Corynebacterium durum	Vanco	IniMTT	0	0.0678892	13.7205	Decreased	Tested	1	1
Corynebacterium durum	Vanco	EndMTT	7	0.5625	6.28766	Decreased	Tested	0.333333	0.333333
Corynebacterium durum	Vanco	FollUp	3	0.15625	11.0732	Decreased	Tested	0.714286	0.714286
Corynebacterium durum	IniMTT	EndMTT	1	0.0625	6.53609	Increased	Tested	-0.904762	0.904762
Corynebacterium durum	IniMTT	FollUp	8	0.6875	2.32791	Increased	Tested	-0.238095	0.238095
Corynebacterium durum	EndMTT	FollUp	0	0.0678892	4.50246	Decreased	Tested	1	1
Desulfotomaculum_u_s	Baseline	Vanco	0	0.0421682	9.2024	Decreased	Tested	1	1
Desulfotomaculum_u_s	Baseline	IniMTT	7	0.892738	1.08757	Increased	Tested	0.0666667	0.0666667
Desulfotomaculum_u_s	Baseline	EndMTT	7	0.892738	5.04214	Increased	Tested	-0.0666667	0.0666667
Desulfotomaculum_u_s	Baseline	FollUp	3	0.465209	4.01384	Increased	Tested	-0.4	0.4
Desulfotomaculum_u_s	Vanco	IniMTT	0	0.0678892	9.42285	Increased	Tested	-1	1
Desulfotomaculum_u_s	Vanco	EndMTT	0	0.0431144	13.0442	Increased	Tested	-1	1
Desulfotomaculum_u_s	Vanco	FollUp	0	0.03125	12.1025	Increased	Tested	-1	1
Desulfotomaculum_u_s	IniMTT	EndMTT	1	0.144127	3.99804	Increased	Tested	-0.8	0.8
Desulfotomaculum_u_s	IniMTT	FollUp	7	0.5625	2.95844	Increased	Tested	-0.333333	0.333333
Desulfotomaculum_u_s	EndMTT	FollUp	10	1	1.0829	Decreased	Tested	-0.047619	0.047619
Desulfovibrio legallii	Baseline	Vanco	0	0.108809	3.43682	Increased	Tested	-1	1
Desulfovibrio legallii	Baseline	IniMTT	1	0.654721	0.179383	Increased	Tested	-0.333333	0.333333
Desulfovibrio legallii	Baseline	EndMTT	1	0.654721	0.0562904	Decreased	Tested	0.333333	0.333333
Desulfovibrio legallii	Baseline	FollUp	0	0.10247	0.756895	Decreased	Tested	1	1
Desulfovibrio legallii	Vanco	IniMTT	0	0.108809	3.37337	Decreased	Tested	1	1
Desulfovibrio legallii	Vanco	EndMTT	0	0.108809	3.61744	Decreased	Tested	1	1
Desulfovibrio legallii	Vanco	FollUp	0	0.108809	4.34298	Decreased	Tested	1	1
Desulfovibrio legallii	IniMTT	EndMTT	2	0.59298	0.236096	Decreased	Tested	0.333333	0.333333
Desulfovibrio legallii	IniMTT	FollUp	0	0.108809	0.93796	Decreased	Tested	1	1
Desulfovibrio legallii	EndMTT	FollUp	0	0.179712	0.700211	Decreased	Tested	1	1
Desulfovibrio piger	Baseline	Vanco	1	0.654721	4.72287	Decreased	Tested	0.333333	0.333333
Desulfovibrio piger	Baseline	IniMTT	0	0.179712	0.813333	Increased	Tested	-1	1
Desulfovibrio piger	Baseline	EndMTT	3	1	2.14078	Decreased	Tested	0	0
Desulfovibrio piger	Baseline	FollUp	1	0.654721	0.351099	Decreased	Tested	0.333333	0.333333
Desulfovibrio piger	Vanco	IniMTT	0	0.317311	5.28653	Increased	Tested	-1	1
Desulfovibrio piger	Vanco	EndMTT	1	0.285049	2.46565	Increased	Tested	-0.666667	0.666667
Desulfovibrio piger	Vanco	FollUp	1	0.285049	4.17461	Increased	Tested	-0.666667	0.666667
Desulfovibrio piger	IniMTT	EndMTT	2	0.59298	2.97834	Decreased	Tested	0.333333	0.333333
Desulfovibrio piger	IniMTT	FollUp	2	0.59298	1.17398	Decreased	Tested	0.333333	0.333333
Desulfovibrio piger	EndMTT	FollUp	3	1	1.75217	Increased	Tested	0	0
Desulfovibrio_u_s	Baseline	Vanco	0	0.317311	1.8328	Decreased	Tested	1	1
Desulfovibrio_u_s	Baseline	IniMTT	0	0.317311	1.727	Increased	Tested	-1	1
Desulfovibrio_u_s	Baseline	EndMTT	0	0.317311	0.0157267	Decreased	Tested	1	1
Desulfovibrio_u_s	Baseline	FollUp	0	0.317311	0.418959	Decreased	Tested	1	1
Desulfovibrio_u_s	Vanco	IniMTT	0	0.317311	3.49574	Increased	Tested	-1	1
Desulfovibrio_u_s	Vanco	EndMTT	0	0.317311	1.78437	Increased	Tested	-1	1
Desulfovibrio_u_s	Vanco	FollUp	0	0.317311	1.3884	Increased	Tested	-1	1
Desulfovibrio_u_s	IniMTT	EndMTT	0	0.317311	1.77336	Decreased	Tested	1	1
Desulfovibrio_u_s	IniMTT	FollUp	0	0.317311	2.18367	Decreased	Tested	1	1
Desulfovibrio_u_s	EndMTT	FollUp	0	0.317311	0.403168	Decreased	Tested	1	1
Dialister invisus	Baseline	Vanco	0	0.179712	4.27217	Decreased	Tested	1	1
Dialister invisus	Baseline	IniMTT	0	0.179712	5.66827	Decreased	Tested	1	1
Dialister invisus	Baseline	EndMTT	2	0.59298	2.7089	Increased	Tested	-0.333333	0.333333
Dialister invisus	Baseline	FollUp	1	0.285049	5.88885	Increased	Tested	-0.666667	0.666667
Dialister invisus	Vanco	IniMTT	0	0.179712	1.3389	Decreased	Tested	1	1
Dialister invisus	Vanco	EndMTT	2	0.59298	6.69505	Increased	Tested	-0.333333	0.333333
Dialister invisus	Vanco	FollUp	1	0.285049	9.74471	Increased	Tested	-0.666667	0.666667
Dialister invisus	IniMTT	EndMTT	0	0.179712	7.9278	Increased	Tested	-1	1
Dialister invisus	IniMTT	FollUp	0	0.179712	10.9372	Increased	Tested	-1	1
Dialister invisus	EndMTT	FollUp	1	0.654721	3.26848	Increased	Tested	-0.333333	0.333333
Dialister pneumosintes	Baseline	Vanco	0	0.108809	2.44599	Increased	Tested	-1	1
Dialister pneumosintes	Baseline	IniMTT	0	0.179712	3.81856	Increased	Tested	-1	1
Dialister pneumosintes	Baseline	EndMTT	0	0.317311	3.57222	Increased	Tested	-1	1
Dialister pneumosintes	Baseline	FollUp			0	No change	Identical Values
Dialister pneumosintes	Vanco	IniMTT	5	1	1.40698	Increased	Tested	0	0
Dialister pneumosintes	Vanco	EndMTT	3	1	1.15447	Increased	Tested	0	0
Dialister pneumosintes	Vanco	FollUp	0	0.108809	2.50732	Decreased	Tested	1	1
Dialister pneumosintes	IniMTT	EndMTT	0	0.179712	0.256119	Decreased	Tested	1	1
Dialister pneumosintes	IniMTT	FollUp	0	0.179712	3.97016	Decreased	Tested	1	1
Dialister pneumosintes	EndMTT	FollUp	0	0.317311	3.70455	Decreased	Tested	1	1
Dielma fastidiosa	Baseline	Vanco	1	0.654721	1.40932	Decreased	Tested	0.333333	0.333333
Dielma fastidiosa	Baseline	IniMTT	7	0.89225	1.67838	Increased	Tested	-0.0666667	0.0666667
Dielma fastidiosa	Baseline	EndMTT	1	0.0782482	5.1138	Increased	Tested	-0.866667	0.866667
Dielma fastidiosa	Baseline	FollUp	7	0.89225	4.08877	Increased	Tested	-0.0666667	0.0666667
Dielma fastidiosa	Vanco	IniMTT	4	0.343028	3.04479	Increased	Tested	-0.466667	0.466667
Dielma fastidiosa	Vanco	EndMTT	3	0.222801	6.43246	Increased	Tested	-0.6	0.6
Dielma fastidiosa	Vanco	FollUp	3	0.222801	5.42169	Increased	Tested	-0.6	0.6
Dielma fastidiosa	IniMTT	EndMTT	3	0.222801	3.49406	Increased	Tested	-0.6	0.6
Dielma fastidiosa	IniMTT	FollUp	0	0.108809	2.45154	Increased	Tested	-1	1
Dielma fastidiosa	EndMTT	FollUp	5	0.498225	1.08026	Decreased	Tested	0.333333	0.333333
Dorea formicigenerans	Baseline	Vanco	4	0.21875	17.3009	Decreased	Tested	0.619048	0.619048
Dorea formicigenerans	Baseline	IniMTT	9	0.84375	4.16709	Increased	Tested	-0.142857	0.142857
Dorea formicigenerans	Baseline	EndMTT	5	0.3125	19.1321	Increased	Tested	-0.52381	0.52381
Dorea formicigenerans	Baseline	FollUp	0	0.03125	27.3847	Increased	Tested	-1	1
Dorea formicigenerans	Vanco	IniMTT	8	0.6875	18.3016	Increased	Tested	-0.238095	0.238095
Dorea formicigenerans	Vanco	EndMTT	2	0.09375	31.0594	Increased	Tested	-0.809524	0.809524
Dorea formicigenerans	Vanco	FollUp	1	0.0625	38.0948	Increased	Tested	-0.904762	0.904762
Dorea formicigenerans	IniMTT	EndMTT	9	0.84375	15.6157	Increased	Tested	-0.142857	0.142857
Dorea formicigenerans	IniMTT	FollUp	3	0.15625	24.2272	Increased	Tested	-0.714286	0.714286
Dorea formicigenerans	EndMTT	FollUp	3	0.15625	10.205	Increased	Tested	-0.714286	0.714286
Dorea longicatena	Baseline	Vanco	0	0.03125	41.4167	Decreased	Tested	1	1
Dorea longicatena	Baseline	IniMTT	9	0.84375	6.77224	Decreased	Tested	-0.142857	0.142857
Dorea longicatena	Baseline	EndMTT	10	1	0.948458	Decreased	Tested	0.047619	0.047619
Dorea longicatena	Baseline	FollUp	2	0.09375	21.2556	Increased	Tested	-0.809524	0.809524
Dorea longicatena	Vanco	IniMTT	6	0.4375	24.4981	Increased	Tested	-0.428571	0.428571
Dorea longicatena	Vanco	EndMTT	2	0.09375	28.6163	Increased	Tested	-0.809524	0.809524
Dorea longicatena	Vanco	FollUp	1	0.0625	44.3174	Increased	Tested	-0.904762	0.904762
Dorea longicatena	IniMTT	EndMTT	7	0.5625	5.45439	Increased	Tested	-0.333333	0.333333
Dorea longicatena	IniMTT	FollUp	0	0.03125	26.2501	Increased	Tested	-1	1
Dorea longicatena	EndMTT	FollUp	1	0.0625	21.9954	Increased	Tested	-0.904762	0.904762
Dorea_u_s	Baseline	Vanco	2	0.138011	17.059	Decreased	Tested	0.733333	0.733333
Dorea_u_s	Baseline	IniMTT	10	1	0.882421	Increased	Tested	0.047619	0.047619
Dorea_u_s	Baseline	EndMTT	5	0.3125	16.6404	Increased	Tested	-0.52381	0.52381
Dorea_u_s	Baseline	FollUp	6	0.4375	21.9604	Increased	Tested	-0.428571	0.428571
Dorea_u_s	Vanco	IniMTT	8	0.6875	15.3268	Increased	Tested	-0.238095	0.238095
Dorea_u_s	Vanco	EndMTT	1	0.0625	28.7883	Increased	Tested	-0.904762	0.904762
Dorea_u_s	Vanco	FollUp	1	0.0625	33.3331	Increased	Tested	-0.904762	0.904762
Dorea_u_s	IniMTT	EndMTT	8	0.6875	15.8982	Increased	Tested	-0.238095	0.238095
Dorea_u_s	IniMTT	FollUp	3	0.15625	21.2657	Increased	Tested	-0.714286	0.714286
Dorea_u_s	EndMTT	FollUp	5	0.3125	6.38208	Increased	Tested	-0.52381	0.52381
Drancourtella massiliensis	Baseline	Vanco	3	0.224916	9.71354	Decreased	Tested	0.6	0.6
Drancourtella massiliensis	Baseline	IniMTT	3.5	0.21875	17.9095	Decreased	Tested	0.666667	0.666667
Drancourtella massiliensis	Baseline	EndMTT	4	0.715001	5.81739	Increased	Tested	-0.2	0.2
Drancourtella massiliensis	Baseline	FollUp	10	1	5.25603	Increased	Tested	-0.047619	0.047619
Drancourtella massiliensis	Vanco	IniMTT	6	0.68583	7.47033	Decreased	Tested	0.2	0.2
Drancourtella massiliensis	Vanco	EndMTT	3	0.224916	14.1559	Increased	Tested	-0.6	0.6
Drancourtella massiliensis	Vanco	FollUp	2	0.273322	13.6442	Increased	Tested	-0.6	0.6
Drancourtella massiliensis	IniMTT	EndMTT	1.5	0.0625	20.123	Increased	Tested	-0.857143	0.857143
Drancourtella massiliensis	IniMTT	FollUp	1	0.144127	19.6469	Increased	Tested	-0.8	0.8
Drancourtella massiliensis	EndMTT	FollUp	8	0.6875	0.596039	Decreased	Tested	0.238095	0.238095
Dysosmobacter welbionis	Baseline	Vanco	0	0.03125	22.7475	Decreased	Tested	1	1
Dysosmobacter welbionis	Baseline	IniMTT	8	0.6875	2.39547	Increased	Tested	-0.238095	0.238095
Dysosmobacter welbionis	Baseline	EndMTT	5	0.3125	11.4443	Increased	Tested	-0.52381	0.52381
Dysosmobacter welbionis	Baseline	FollUp	8	0.6875	8.2184	Increased	Tested	-0.238095	0.238095
Dysosmobacter welbionis	Vanco	IniMTT	3	0.15625	20.4835	Increased	Tested	-0.714286	0.714286
Dysosmobacter welbionis	Vanco	EndMTT	1	0.0625	27.8554	Increased	Tested	-0.904762	0.904762
Dysosmobacter welbionis	Vanco	FollUp	0	0.0431144	25.2273	Increased	Tested	-1	1
Dysosmobacter welbionis	IniMTT	EndMTT	9	0.84375	9.27089	Increased	Tested	-0.142857	0.142857
Dysosmobacter welbionis	IniMTT	FollUp	10	1	5.96584	Increased	Tested	-0.047619	0.047619
Dysosmobacter welbionis	EndMTT	FollUp	9	0.84375	3.64278	Decreased	Tested	0.142857	0.142857
Eggerthella lenta	Baseline	Vanco	0	0.03125	29.5448	Decreased	Tested	1	1
Eggerthella lenta	Baseline	IniMTT	3	0.15625	31.3059	Decreased	Tested	0.714286	0.714286
Eggerthella lenta	Baseline	EndMTT	2	0.09375	14.543	Decreased	Tested	0.809524	0.809524
Eggerthella lenta	Baseline	FollUp	2	0.09375	25.0462	Decreased	Tested	0.809524	0.809524
Eggerthella lenta	Vanco	IniMTT	8	0.6875	1.35946	Decreased	Tested	0.238095	0.238095
Eggerthella lenta	Vanco	EndMTT	5	0.3125	11.5804	Increased	Tested	-0.52381	0.52381
Eggerthella lenta	Vanco	FollUp	9	0.84375	3.47264	Increased	Tested	-0.142857	0.142857
Eggerthella lenta	IniMTT	EndMTT	7	0.5625	12.7663	Increased	Tested	-0.333333	0.333333
Eggerthella lenta	IniMTT	FollUp	9	0.84375	4.76729	Increased	Tested	-0.142857	0.142857
Eggerthella lenta	EndMTT	FollUp	6	0.4375	9.16961	Decreased	Tested	0.428571	0.428571
Eggerthella sinensis	Baseline	Vanco	1	0.654721	0.158247	Decreased	Tested	0.333333	0.333333
Eggerthella sinensis	Baseline	IniMTT			0	No change	Identical Values
Eggerthella sinensis	Baseline	EndMTT	1	0.654721	0.318914	Increased	Tested	-0.333333	0.333333
Eggerthella sinensis	Baseline	FollUp	1	0.654721	0.158247	Decreased	Tested	0.333333	0.333333
Eggerthella sinensis	Vanco	IniMTT	1	0.654721	0.157997	Increased	Tested	-0.333333	0.333333
Eggerthella sinensis	Vanco	EndMTT	0	0.179712	0.476407	Increased	Tested	-1	1
Eggerthella sinensis	Vanco	FollUp	1.5	1	0	No change	Tested	0	0
Eggerthella sinensis	IniMTT	EndMTT	1	0.654721	0.318914	Increased	Tested	-0.333333	0.333333
Eggerthella sinensis	IniMTT	FollUp	1	0.654721	0.158247	Decreased	Tested	0.333333	0.333333
Eggerthella sinensis	EndMTT	FollUp	1.5	0.414216	0.478688	Decreased	Tested	0.5	0.5
Eggerthella_u_s	Baseline	Vanco	2	0.09375	27.2813	Decreased	Tested	0.809524	0.809524
Eggerthella_u_s	Baseline	IniMTT	3	0.15625	31.3729	Decreased	Tested	0.714286	0.714286
Eggerthella_u_s	Baseline	EndMTT	4	0.21875	14.0273	Decreased	Tested	0.619048	0.619048
Eggerthella_u_s	Baseline	FollUp	2	0.09375	22.8267	Decreased	Tested	0.809524	0.809524
Eggerthella_u_s	Vanco	IniMTT	9	0.84375	3.21461	Decreased	Tested	0.142857	0.142857
Eggerthella_u_s	Vanco	EndMTT	6	0.4375	10.4131	Increased	Tested	-0.428571	0.428571
Eggerthella_u_s	Vanco	FollUp	8	0.6875	3.4998	Increased	Tested	-0.238095	0.238095
Eggerthella_u_s	IniMTT	EndMTT	8	0.6875	13.2033	Increased	Tested	-0.238095	0.238095
Eggerthella_u_s	IniMTT	FollUp	8	0.6875	6.50529	Increased	Tested	-0.238095	0.238095
Eggerthella_u_s	EndMTT	FollUp	6	0.4375	7.71692	Decreased	Tested	0.428571	0.428571
Eisenbergiella_u_s	Baseline	Vanco	1	0.654721	0.303736	Decreased	Tested	0.333333	0.333333
Eisenbergiella_u_s	Baseline	IniMTT	0	0.317311	0.303736	Decreased	Tested	1	1
Eisenbergiella_u_s	Baseline	EndMTT	1	0.654721	0.308035	Increased	Tested	-0.333333	0.333333
Eisenbergiella_u_s	Baseline	FollUp	1	0.654721	0.130444	Decreased	Tested	0.333333	0.333333
Eisenbergiella_u_s	Vanco	IniMTT	1.5	1	0	No change	Tested	0	0
Eisenbergiella_u_s	Vanco	EndMTT	1.5	0.414216	0.609919	Increased	Tested	-0.5	0.5
Eisenbergiella_u_s	Vanco	FollUp	2	0.563703	0.172767	Increased	Tested	-0.333333	0.333333
Eisenbergiella_u_s	IniMTT	EndMTT	0	0.317311	0.609919	Increased	Tested	-1	1
Eisenbergiella_u_s	IniMTT	FollUp	0	0.317311	0.172767	Increased	Tested	-1	1
Eisenbergiella_u_s	EndMTT	FollUp	0	0.317311	0.439834	Decreased	Tested	1	1
Eisenbergiella tayi	Baseline	Vanco	0	0.0678892	2.47922	Decreased	Tested	1	1
Eisenbergiella tayi	Baseline	IniMTT	0	0.0655997	2.46375	Decreased	Tested	1	1
Eisenbergiella tayi	Baseline	EndMTT	5	0.500184	11.2628	Increased	Tested	-0.333333	0.333333
Eisenbergiella tayi	Baseline	FollUp	7	0.892738	5.51057	Increased	Tested	0.0666667	0.0666667
Eisenbergiella tayi	Vanco	IniMTT	4	0.705457	0.015093	Increased	Tested	-0.2	0.2
Eisenbergiella tayi	Vanco	EndMTT	1	0.0796158	13.4095	Increased	Tested	-0.866667	0.866667
Eisenbergiella tayi	Vanco	FollUp	1	0.144127	7.7965	Increased	Tested	-0.8	0.8
Eisenbergiella tayi	IniMTT	EndMTT	0	0.108809	13.3965	Increased	Tested	-1	1
Eisenbergiella tayi	IniMTT	FollUp	1.5	0.197466	7.78258	Increased	Tested	-0.7	0.7
Eisenbergiella tayi	EndMTT	FollUp	0	0.0678892	6.48228	Decreased	Tested	1	1
Emergencia timonensis	Baseline	Vanco	0	0.317311	9.01424	Decreased	Tested	1	1
Emergencia timonensis	Baseline	IniMTT	0	0.317311	4.61514	Decreased	Tested	1	1
Emergencia timonensis	Baseline	EndMTT	0	0.317311	8.82622	Decreased	Tested	1	1
Emergencia timonensis	Baseline	FollUp	0	0.317311	9.01424	Decreased	Tested	1	1
Emergencia timonensis	Vanco	IniMTT	0	0.317311	4.03535	Increased	Tested	-1	1
Emergencia timonensis	Vanco	EndMTT	0	0.317311	0.17247	Increased	Tested	-1	1
Emergencia timonensis	Vanco	FollUp			0	No change	Identical Values
Emergencia timonensis	IniMTT	EndMTT	0	0.317311	4.02531	Decreased	Tested	1	1
Emergencia timonensis	IniMTT	FollUp	0	0.317311	4.20503	Decreased	Tested	1	1
Emergencia timonensis	EndMTT	FollUp	0	0.317311	0.172767	Decreased	Tested	1	1
Enterobacter_u_s	Baseline	Vanco	0	0.108809	18.6081	Increased	Tested	-1	1
Enterobacter_u_s	Baseline	IniMTT	0	0.0655997	1.6702	Increased	Tested	-1	1
Enterobacter_u_s	Baseline	EndMTT	0	0.317311	5.01717	Increased	Tested	-1	1
Enterobacter_u_s	Baseline	FollUp	0	0.179712	0.647233	Increased	Tested	-1	1
Enterobacter_u_s	Vanco	IniMTT	2	0.273322	20.8102	Decreased	Tested	0.6	0.6
Enterobacter_u_s	Vanco	EndMTT	0	0.108809	16.6981	Decreased	Tested	1	1
Enterobacter_u_s	Vanco	FollUp	1	0.144127	22.0671	Decreased	Tested	0.8	0.8
Enterobacter_u_s	IniMTT	EndMTT	4	0.712702	3.40381	Increased	Tested	0.2	0.2
Enterobacter_u_s	IniMTT	FollUp	2.5	0.357273	1.04035	Decreased	Tested	0.5	0.5
Enterobacter_u_s	EndMTT	FollUp	3	1	4.60076	Decreased	Tested	0	0
Enterococcus_u_s	Baseline	Vanco	0	0.179712	2.58823	Increased	Tested	-1	1
Enterococcus_u_s	Baseline	IniMTT	0	0.179712	5.91166	Increased	Tested	-1	1
Enterococcus_u_s	Baseline	EndMTT	0	0.179712	9.47421	Increased	Tested	-1	1
Enterococcus_u_s	Baseline	FollUp			0	No change	Identical Values
Enterococcus_u_s	Vanco	IniMTT	1	0.285049	3.41173	Increased	Tested	-0.666667	0.666667
Enterococcus_u_s	Vanco	EndMTT	1	0.285049	7.06894	Increased	Tested	-0.666667	0.666667
Enterococcus_u_s	Vanco	FollUp	0	0.179712	2.657	Decreased	Tested	1	1
Enterococcus_u_s	IniMTT	EndMTT	1	0.654721	3.78639	Increased	Tested	-0.333333	0.333333
Enterococcus_u_s	IniMTT	FollUp	0	0.179712	6.28309	Decreased	Tested	1	1
Enterococcus_u_s	EndMTT	FollUp	0	0.179712	10.4658	Decreased	Tested	1	1
Enterococcus faecalis	Baseline	Vanco	2	0.273322	8.65071	Increased	Tested	-0.6	0.6
Enterococcus faecalis	Baseline	IniMTT	5	1	3.21636	Increased	Tested	0	0
Enterococcus faecalis	Baseline	EndMTT	4	0.715001	9.41998	Increased	Tested	-0.2	0.2
Enterococcus faecalis	Baseline	FollUp	3	0.465209	3.46908	Increased	Tested	-0.4	0.4
Enterococcus faecalis	Vanco	IniMTT	3	0.465209	5.94897	Decreased	Tested	0.4	0.4
Enterococcus faecalis	Vanco	EndMTT	3	1	0.842126	Increased	Tested	0	0
Enterococcus faecalis	Vanco	FollUp	3	0.465209	5.67232	Decreased	Tested	0.4	0.4
Enterococcus faecalis	IniMTT	EndMTT	3	0.461451	6.40978	Increased	Tested	-0.4	0.4
Enterococcus faecalis	IniMTT	FollUp	3	1	0.261116	Increased	Tested	0	0
Enterococcus faecalis	EndMTT	FollUp	3	0.465209	6.56977	Decreased	Tested	0.4	0.4
Enterococcus faecium	Baseline	Vanco	0	0.179712	3.2212	Decreased	Tested	1	1
Enterococcus faecium	Baseline	IniMTT	4.5	0.853923	0.240238	Increased	Tested	-0.1	0.1
Enterococcus faecium	Baseline	EndMTT	4	0.715001	0.914166	Increased	Tested	-0.2	0.2
Enterococcus faecium	Baseline	FollUp	0	0.179712	3.2212	Decreased	Tested	1	1
Enterococcus faecium	Vanco	IniMTT	0	0.179712	3.35342	Increased	Tested	-1	1
Enterococcus faecium	Vanco	EndMTT	0	0.108809	4.00632	Increased	Tested	-1	1
Enterococcus faecium	Vanco	FollUp			0	No change	Identical Values
Enterococcus faecium	IniMTT	EndMTT	0	0.108809	0.675551	Increased	Tested	-1	1
Enterococcus faecium	IniMTT	FollUp	0	0.179712	3.46978	Decreased	Tested	1	1
Enterococcus faecium	EndMTT	FollUp	0	0.108809	4.17352	Decreased	Tested	1	1
Adlercreutzia caecimuris	Baseline	Vanco	3	1	0.0664425	Decreased	Tested	0	0
Adlercreutzia caecimuris	Baseline	IniMTT	2	0.256839	0.505805	Decreased	Tested	0.6	0.6
Adlercreutzia caecimuris	Baseline	EndMTT	0	0.317311	0.173641	Decreased	Tested	1	1
Adlercreutzia caecimuris	Baseline	FollUp	0	0.10247	0.679446	Decreased	Tested	1	1
Adlercreutzia caecimuris	Vanco	IniMTT	1	0.654721	0.439071	Decreased	Tested	0.333333	0.333333
Adlercreutzia caecimuris	Vanco	EndMTT	1	0.654721	0.107128	Decreased	Tested	0.333333	0.333333
Adlercreutzia caecimuris	Vanco	FollUp	0	0.317311	0.612597	Decreased	Tested	1	1
Adlercreutzia caecimuris	IniMTT	EndMTT	1.5	0.414216	0.330492	Increased	Tested	-0.5	0.5
Adlercreutzia caecimuris	IniMTT	FollUp	0	0.317311	0.172767	Decreased	Tested	1	1
Adlercreutzia caecimuris	EndMTT	FollUp	0	0.179712	0.504928	Decreased	Tested	1	1
Adlercreutzia mucosicola	Baseline	Vanco	1.5	1	0	No change	Tested	0	0
Adlercreutzia mucosicola	Baseline	IniMTT	1.5	1	0	No change	Tested	0	0
Adlercreutzia mucosicola	Baseline	EndMTT			0	No change	Identical Values
Adlercreutzia mucosicola	Baseline	FollUp	0	0.317311	0.172767	Decreased	Tested	1	1
Adlercreutzia mucosicola	Vanco	IniMTT	1.5	1	0	No change	Tested	0	0
Adlercreutzia mucosicola	Vanco	EndMTT	1.5	1	0	No change	Tested	0	0
Adlercreutzia mucosicola	Vanco	FollUp	0	0.317311	0.172767	Decreased	Tested	1	1
Adlercreutzia mucosicola	IniMTT	EndMTT	1.5	1	0	No change	Tested	0	0
Adlercreutzia mucosicola	IniMTT	FollUp	0	0.317311	0.172767	Decreased	Tested	1	1
Adlercreutzia mucosicola	EndMTT	FollUp	0	0.317311	0.172767	Decreased	Tested	1	1
Enterorhabdus_u_s	Baseline	Vanco	0	0.317311	0.790461	Increased	Tested	-1	1
Enterorhabdus_u_s	Baseline	IniMTT	0	0.157299	0.346133	Decreased	Tested	1	1
Enterorhabdus_u_s	Baseline	EndMTT	0	0.317311	0.303341	Increased	Tested	-1	1
Enterorhabdus_u_s	Baseline	FollUp	0	0.317311	0.173066	Decreased	Tested	1	1
Enterorhabdus_u_s	Vanco	IniMTT	0	0.179712	1.14565	Decreased	Tested	1	1
Enterorhabdus_u_s	Vanco	EndMTT	1	0.654721	0.491001	Decreased	Tested	0.333333	0.333333
Enterorhabdus_u_s	Vanco	FollUp	0	0.317311	0.971204	Decreased	Tested	1	1
Enterorhabdus_u_s	IniMTT	EndMTT	0	0.179712	0.647233	Increased	Tested	-1	1
Enterorhabdus_u_s	IniMTT	FollUp	0	0.317311	0.17247	Increased	Tested	-1	1
Enterorhabdus_u_s	EndMTT	FollUp	0	0.179712	0.477857	Decreased	Tested	1	1
Enteroscipio rubneri	Baseline	Vanco	1	0.285049	10.5056	Decreased	Tested	0.666667	0.666667
Enteroscipio rubneri	Baseline	IniMTT	3	0.465209	13.5333	Decreased	Tested	0.4	0.4
Enteroscipio rubneri	Baseline	EndMTT	1	0.285049	12.2446	Decreased	Tested	0.666667	0.666667
Enteroscipio rubneri	Baseline	FollUp	1	0.285049	13.215	Decreased	Tested	0.666667	0.666667
Enteroscipio rubneri	Vanco	IniMTT	2.5	0.357273	2.73989	Decreased	Tested	0.5	0.5
Enteroscipio rubneri	Vanco	EndMTT	3	1	1.57364	Decreased	Tested	0	0
Enteroscipio rubneri	Vanco	FollUp	1	0.654721	2.45186	Decreased	Tested	0.333333	0.333333
Enteroscipio rubneri	IniMTT	EndMTT	1.5	0.197466	1.13515	Increased	Tested	-0.7	0.7
Enteroscipio rubneri	IniMTT	FollUp	1.5	0.414216	0.280353	Increased	Tested	-0.5	0.5
Enteroscipio rubneri	EndMTT	FollUp	0	0.108809	0.864609	Decreased	Tested	1	1
Erysipelatoclostridium ramosum	Baseline	Vanco	1	0.654721	3.42384	Decreased	Tested	0.333333	0.333333
Erysipelatoclostridium ramosum	Baseline	IniMTT	0	0.179712	3.25787	Decreased	Tested	1	1
Erysipelatoclostridium ramosum	Baseline	EndMTT	1	0.285049	0.935013	Increased	Tested	-0.666667	0.666667
Erysipelatoclostridium ramosum	Baseline	FollUp	3	1	2.09927	Increased	Tested	0	0
Erysipelatoclostridium ramosum	Vanco	IniMTT	1	0.654721	0.160479	Increased	Tested	-0.333333	0.333333
Erysipelatoclostridium ramosum	Vanco	EndMTT	2	0.59298	4.21455	Increased	Tested	-0.333333	0.333333
Erysipelatoclostridium ramosum	Vanco	FollUp	2	0.59298	5.34026	Increased	Tested	-0.333333	0.333333
Erysipelatoclostridium ramosum	IniMTT	EndMTT	0	0.179712	4.06059	Increased	Tested	-1	1
Erysipelatoclostridium ramosum	IniMTT	FollUp	0	0.179712	5.18811	Increased	Tested	-1	1
Erysipelatoclostridium ramosum	EndMTT	FollUp	1	0.654721	1.17524	Increased	Tested	-0.333333	0.333333
Erysipelatoclostridium_u_s	Baseline	Vanco	0	0.317311	0.329922	Increased	Tested	-1	1
Erysipelatoclostridium_u_s	Baseline	IniMTT	0	0.10247	2.82032	Increased	Tested	-1	1
Erysipelatoclostridium_u_s	Baseline	EndMTT	0	0.157299	0.659844	Increased	Tested	-1	1
Erysipelatoclostridium_u_s	Baseline	FollUp	0	0.157299	0.344939	Increased	Tested	-1	1
Erysipelatoclostridium_u_s	Vanco	IniMTT	2	0.256839	2.49864	Increased	Tested	-0.6	0.6
Erysipelatoclostridium_u_s	Vanco	EndMTT	2	0.563703	0.331014	Increased	Tested	-0.333333	0.333333
Erysipelatoclostridium_u_s	Vanco	FollUp	3	1	0.0150669	Increased	Tested	0	0
Erysipelatoclostridium_u_s	IniMTT	EndMTT	1.5	0.414216	2.22318	Decreased	Tested	0.5	0.5
Erysipelatoclostridium_u_s	IniMTT	FollUp	2	0.273322	2.54722	Decreased	Tested	0.6	0.6
Erysipelatoclostridium_u_s	EndMTT	FollUp	0	0.157299	0.316996	Decreased	Tested	1	1
Erysipelotrichaceae_u_s	Baseline	Vanco	6	0.4375	18.8817	Decreased	Tested	0.428571	0.428571
Erysipelotrichaceae_u_s	Baseline	IniMTT	6	0.4375	13.8407	Increased	Tested	-0.428571	0.428571
Erysipelotrichaceae_u_s	Baseline	EndMTT	7	0.5625	5.91511	Increased	Tested	-0.333333	0.333333
Erysipelotrichaceae_u_s	Baseline	FollUp	4	0.21875	10.8235	Increased	Tested	-0.619048	0.619048
Erysipelotrichaceae_u_s	Vanco	IniMTT	6	0.4375	27.5252	Increased	Tested	-0.428571	0.428571
Erysipelotrichaceae_u_s	Vanco	EndMTT	3	0.15625	20.8584	Increased	Tested	-0.714286	0.714286
Erysipelotrichaceae_u_s	Vanco	FollUp	4	0.21875	24.9872	Increased	Tested	-0.619048	0.619048
Erysipelotrichaceae_u_s	IniMTT	EndMTT	6	0.4375	9.19882	Decreased	Tested	0.428571	0.428571
Erysipelotrichaceae_u_s	IniMTT	FollUp	10	1	3.50194	Decreased	Tested	0.047619	0.047619
[truncated: 3,695 more rows]

## Sheet: shotgun_hypothesized_taxa
feature	TimePoint1	TimePoint2	Wilcoxon_Stat	P_Value	%_change_WRT_first_timepoint	Direction_change_WRT_first_timepoint	Status	Rank_Biserial_r	Rank_Biserial_r_Abs	one-tailed_hypothesis	Reference_for_hypothesis					feature	TimePoint1	TimePoint2	Wilcoxon_Stat	P_Value	%_change_WRT_first_timepoint	Direction_change_WRT_first_timepoint	Status	Rank_Biserial_r	Rank_Biserial_r_Abs	one-tailed_hypothesis	Reference_for_hypothesis
Enterocloster bolteae	Baseline	Vanco	14	0.0398079	21.2657	Decreased	Tested	0.866667	0.866667	Greater at Baseline	Dilmore et al., 2021 https://journals.asm.org/doi/10.1128/msystems.01006-21					Bifidobacterium adolescentis	Baseline	Vanco	9	0.657085	19.5273	Decreased	Tested	0.2	0.2	Lower at Baseline	Kang et al., 2017 https://doi.org/10.1186/s40168-016-0225-7
Enterocloster bolteae	Baseline	IniMTT	15	0.0215572	25.0259	Decreased	Tested	1	1	Greater at Baseline	Dilmore et al., 2021 https://journals.asm.org/doi/10.1128/msystems.01006-21					Bifidobacterium adolescentis	Baseline	IniMTT	17	0.921875	51.525	Decreased	Tested	0.619048	0.619048	Lower at Baseline	Kang et al., 2017 https://doi.org/10.1186/s40168-016-0225-7
Enterocloster bolteae	Baseline	EndMTT	13	0.0690054	15.0215	Decreased	Tested	0.733333	0.733333	Greater at Baseline	Dilmore et al., 2021 https://journals.asm.org/doi/10.1128/msystems.01006-21					Bifidobacterium adolescentis	Baseline	EndMTT	10	0.749908	2.0517	Decreased	Tested	0.333333	0.333333	Lower at Baseline	Kang et al., 2017 https://doi.org/10.1186/s40168-016-0225-7
Enterocloster bolteae	Baseline	FollUp	15	0.0215572	19.2891	Decreased	Tested	1	1	Greater at Baseline	Dilmore et al., 2021 https://journals.asm.org/doi/10.1128/msystems.01006-21					Bifidobacterium adolescentis	Baseline	FollUp	11	0.827384	8.22255	Decreased	Tested	0.466667	0.466667	Lower at Baseline	Kang et al., 2017 https://doi.org/10.1186/s40168-016-0225-7
Enterocloster bolteae	Vanco	IniMTT	7	0.232604	3.1008	Decreased	Tested	0.4	0.4	Greater at Baseline	Dilmore et al., 2021 https://journals.asm.org/doi/10.1128/msystems.01006-21					Bifidobacterium adolescentis	Vanco	IniMTT	14	0.78125	26.7702	Decreased	Tested	0.333333	0.333333	Lower at Baseline	Kang et al., 2017 https://doi.org/10.1186/s40168-016-0225-7
Enterocloster bolteae	Vanco	EndMTT	5	0.5	5.14916	Increased	Tested	0	0	Greater at Baseline	Dilmore et al., 2021 https://journals.asm.org/doi/10.1128/msystems.01006-21					Bifidobacterium adolescentis	Vanco	EndMTT	7	0.446369	14.6206	Increased	Tested	-0.0666667	0.0666667	Lower at Baseline	Kang et al., 2017 https://doi.org/10.1186/s40168-016-0225-7
Enterocloster bolteae	Vanco	FollUp	4	0.6425	1.62991	Increased	Tested	-0.2	0.2	Greater at Baseline	Dilmore et al., 2021 https://journals.asm.org/doi/10.1128/msystems.01006-21					Bifidobacterium adolescentis	Vanco	FollUp	7	0.446369	9.45789	Increased	Tested	-0.0666667	0.0666667	Lower at Baseline	Kang et al., 2017 https://doi.org/10.1186/s40168-016-0225-7
Enterocloster bolteae	IniMTT	EndMTT	1	0.857475	8.00184	Increased	Tested	-0.666667	0.666667	Greater at Baseline	Dilmore et al., 2021 https://journals.asm.org/doi/10.1128/msystems.01006-21					Bifidobacterium adolescentis	IniMTT	EndMTT	4	0.109375	32.6503	Increased	Tested	-0.619048	0.619048	Lower at Baseline	Kang et al., 2017 https://doi.org/10.1186/s40168-016-0225-7
Enterocloster bolteae	IniMTT	FollUp	5	0.749908	4.58843	Increased	Tested	-0.333333	0.333333	Greater at Baseline	Dilmore et al., 2021 https://journals.asm.org/doi/10.1128/msystems.01006-21					Bifidobacterium adolescentis	IniMTT	FollUp	6	0.21875	28.5778	Increased	Tested	-0.428571	0.428571	Lower at Baseline	Kang et al., 2017 https://doi.org/10.1186/s40168-016-0225-7
Enterocloster bolteae	EndMTT	FollUp	9	0.342915	3.7103	Decreased	Tested	0.2	0.2	Greater at Baseline	Dilmore et al., 2021 https://journals.asm.org/doi/10.1128/msystems.01006-21					Bifidobacterium adolescentis	EndMTT	FollUp	7	0.767396	6.04679	Decreased	Tested	0.4	0.4	Lower at Baseline	Kang et al., 2017 https://doi.org/10.1186/s40168-016-0225-7
Enterocloster bolteae	pl_Baseline	pl_NoVanco	6	0.125	19.7679	Decreased	Tested	1	1	Greater at Baseline	Dilmore et al., 2021 https://journals.asm.org/doi/10.1128/msystems.01006-21					Bifidobacterium angulatum	Baseline	Vanco	5	0.857475	1.63556	Decreased	Tested	0.666667	0.666667	Lower at Baseline	Kang et al., 2017 https://doi.org/10.1186/s40168-016-0225-7
Enterocloster bolteae	pl_Baseline	pl_IniPart1	3	0.625	8.08164	Decreased	Tested	0	0	Greater at Baseline	Dilmore et al., 2021 https://journals.asm.org/doi/10.1128/msystems.01006-21					Bifidobacterium angulatum	Baseline	IniMTT	6	0.945595	2.8299	Decreased	Tested	1	1	Lower at Baseline	Kang et al., 2017 https://doi.org/10.1186/s40168-016-0225-7
Enterocloster bolteae	pl_NoVanco	pl_IniPart1	1	0.875	9.75744	Increased	Tested	-0.666667	0.666667	Greater at Baseline	Dilmore et al., 2021 https://journals.asm.org/doi/10.1128/msystems.01006-21					Bifidobacterium angulatum	Baseline	EndMTT	3	0.910144	2.34171	Decreased	Tested	1	1	Lower at Baseline	Kang et al., 2017 https://doi.org/10.1186/s40168-016-0225-7
																Bifidobacterium angulatum	Baseline	FollUp	3	0.5	9.25291	Increased	Tested	0	0	Lower at Baseline	Kang et al., 2017 https://doi.org/10.1186/s40168-016-0225-7
																Bifidobacterium angulatum	Vanco	IniMTT	1	0.841345	1.17512	Decreased	Tested	1	1	Lower at Baseline	Kang et al., 2017 https://doi.org/10.1186/s40168-016-0225-7
																Bifidobacterium angulatum	Vanco	EndMTT	2	0.67264	0.694779	Decreased	Tested	0.333333	0.333333	Lower at Baseline	Kang et al., 2017 https://doi.org/10.1186/s40168-016-0225-7
																Bifidobacterium angulatum	Vanco	FollUp	1	0.32736	10.7133	Increased	Tested	-0.333333	0.333333	Lower at Baseline	Kang et al., 2017 https://doi.org/10.1186/s40168-016-0225-7
																Bifidobacterium angulatum	IniMTT	EndMTT	0	0.158655	0.474764	Increased	Tested	-1	1	Lower at Baseline	Kang et al., 2017 https://doi.org/10.1186/s40168-016-0225-7
																Bifidobacterium angulatum	IniMTT	FollUp	0	0.158655	11.7503	Increased	Tested	-1	1	Lower at Baseline	Kang et al., 2017 https://doi.org/10.1186/s40168-016-0225-7
																Bifidobacterium angulatum	EndMTT	FollUp	0	0.158655	11.3293	Increased	Tested	-1	1	Lower at Baseline	Kang et al., 2017 https://doi.org/10.1186/s40168-016-0225-7
																Bifidobacterium animalis	Baseline	Vanco	2	0.67264	8.11306	Decreased	Tested	0.333333	0.333333	Lower at Baseline	Kang et al., 2017 https://doi.org/10.1186/s40168-016-0225-7
																Bifidobacterium animalis	Baseline	IniMTT	3	0.910144	12.3403	Decreased	Tested	1	1	Lower at Baseline	Kang et al., 2017 https://doi.org/10.1186/s40168-016-0225-7
																Bifidobacterium animalis	Baseline	EndMTT	3	0.910144	12.3403	Decreased	Tested	1	1	Lower at Baseline	Kang et al., 2017 https://doi.org/10.1186/s40168-016-0225-7
																Bifidobacterium animalis	Baseline	FollUp	4	0.70351	2.41113	Decreased	Tested	0.333333	0.333333	Lower at Baseline	Kang et al., 2017 https://doi.org/10.1186/s40168-016-0225-7
																Bifidobacterium animalis	Vanco	IniMTT	1	0.841345	3.91	Decreased	Tested	1	1	Lower at Baseline	Kang et al., 2017 https://doi.org/10.1186/s40168-016-0225-7
																Bifidobacterium animalis	Vanco	EndMTT	1	0.841345	3.91	Decreased	Tested	1	1	Lower at Baseline	Kang et al., 2017 https://doi.org/10.1186/s40168-016-0225-7
																Bifidobacterium animalis	Vanco	FollUp	1	0.32736	5.27405	Increased	Tested	-0.333333	0.333333	Lower at Baseline	Kang et al., 2017 https://doi.org/10.1186/s40168-016-0225-7
																Bifidobacterium animalis	IniMTT	EndMTT			0	No change	Identical Values			Lower at Baseline	Kang et al., 2017 https://doi.org/10.1186/s40168-016-0225-7
																Bifidobacterium animalis	IniMTT	FollUp	0	0.158655	8.83846	Increased	Tested	-1	1	Lower at Baseline	Kang et al., 2017 https://doi.org/10.1186/s40168-016-0225-7
																Bifidobacterium animalis	EndMTT	FollUp	0	0.158655	8.83846	Increased	Tested	-1	1	Lower at Baseline	Kang et al., 2017 https://doi.org/10.1186/s40168-016-0225-7
																Bifidobacterium bifidum	Baseline	Vanco	0	0.0544047	15.1856	Increased	Tested	-1	1	Lower at Baseline	Kang et al., 2017 https://doi.org/10.1186/s40168-016-0225-7
																Bifidobacterium bifidum	Baseline	IniMTT	1	0.0720635	27.9788	Increased	Tested	-0.8	0.8	Lower at Baseline	Kang et al., 2017 https://doi.org/10.1186/s40168-016-0225-7
																Bifidobacterium bifidum	Baseline	EndMTT	0	0.0339446	43.0658	Increased	Tested	-1	1	Lower at Baseline	Kang et al., 2017 https://doi.org/10.1186/s40168-016-0225-7
																Bifidobacterium bifidum	Baseline	FollUp	0	0.0339446	43.0495	Increased	Tested	-1	1	Lower at Baseline	Kang et al., 2017 https://doi.org/10.1186/s40168-016-0225-7
																Bifidobacterium bifidum	Vanco	IniMTT	9	0.421875	15.0838	Increased	Tested	-0.142857	0.142857	Lower at Baseline	Kang et al., 2017 https://doi.org/10.1186/s40168-016-0225-7
																Bifidobacterium bifidum	Vanco	EndMTT	3	0.112458	32.872	Increased	Tested	-0.6	0.6	Lower at Baseline	Kang et al., 2017 https://doi.org/10.1186/s40168-016-0225-7
																Bifidobacterium bifidum	Vanco	FollUp	3	0.112458	32.8528	Increased	Tested	-0.6	0.6	Lower at Baseline	Kang et al., 2017 https://doi.org/10.1186/s40168-016-0225-7
																Bifidobacterium bifidum	IniMTT	EndMTT	4	0.172616	20.9479	Increased	Tested	-0.466667	0.466667	Lower at Baseline	Kang et al., 2017 https://doi.org/10.1186/s40168-016-0225-7
																Bifidobacterium bifidum	IniMTT	FollUp	3	0.112458	20.9254	Increased	Tested	-0.6	0.6	Lower at Baseline	Kang et al., 2017 https://doi.org/10.1186/s40168-016-0225-7
																Bifidobacterium bifidum	EndMTT	FollUp	5	0.5	0.02858	Decreased	Tested	0	0	Lower at Baseline	Kang et al., 2017 https://doi.org/10.1186/s40168-016-0225-7
																Bifidobacterium breve	Baseline	Vanco	9	0.657085	3.18436	Decreased	Tested	0.2	0.2	Lower at Baseline	Kang et al., 2017 https://doi.org/10.1186/s40168-016-0225-7
																Bifidobacterium breve	Baseline	IniMTT	8	0.863339	9.82028	Decreased	Tested	0.6	0.6	Lower at Baseline	Kang et al., 2017 https://doi.org/10.1186/s40168-016-0225-7
																Bifidobacterium breve	Baseline	EndMTT	9	0.927936	10.4739	Decreased	Tested	0.8	0.8	Lower at Baseline	Kang et al., 2017 https://doi.org/10.1186/s40168-016-0225-7
																Bifidobacterium breve	Baseline	FollUp	7	0.446369	1.46255	Decreased	Tested	-0.0666667	0.0666667	Lower at Baseline	Kang et al., 2017 https://doi.org/10.1186/s40168-016-0225-7
																Bifidobacterium breve	Vanco	IniMTT	4	0.70351	6.43113	Decreased	Tested	0.333333	0.333333	Lower at Baseline	Kang et al., 2017 https://doi.org/10.1186/s40168-016-0225-7
																Bifidobacterium breve	Vanco	EndMTT	5	0.857475	7.06461	Decreased	Tested	0.666667	0.666667	Lower at Baseline	Kang et al., 2017 https://doi.org/10.1186/s40168-016-0225-7
																Bifidobacterium breve	Vanco	FollUp	3	0.232604	1.66867	Increased	Tested	-0.4	0.4	Lower at Baseline	Kang et al., 2017 https://doi.org/10.1186/s40168-016-0225-7
																Bifidobacterium breve	IniMTT	EndMTT	1	0.841345	0.595202	Decreased	Tested	1	1	Lower at Baseline	Kang et al., 2017 https://doi.org/10.1186/s40168-016-0225-7
																Bifidobacterium breve	IniMTT	FollUp	1	0.142525	7.61037	Increased	Tested	-0.666667	0.666667	Lower at Baseline	Kang et al., 2017 https://doi.org/10.1186/s40168-016-0225-7
																Bifidobacterium breve	EndMTT	FollUp	1	0.142525	8.15702	Increased	Tested	-0.666667	0.666667	Lower at Baseline	Kang et al., 2017 https://doi.org/10.1186/s40168-016-0225-7
																Bifidobacterium catenulatum	Baseline	Vanco	14	0.960192	32.112	Decreased	Tested	0.866667	0.866667	Lower at Baseline	Kang et al., 2017 https://doi.org/10.1186/s40168-016-0225-7
																Bifidobacterium catenulatum	Baseline	IniMTT	15	0.978443	51.3512	Decreased	Tested	1	1	Lower at Baseline	Kang et al., 2017 https://doi.org/10.1186/s40168-016-0225-7
																Bifidobacterium catenulatum	Baseline	EndMTT	15	0.978443	40.9463	Decreased	Tested	1	1	Lower at Baseline	Kang et al., 2017 https://doi.org/10.1186/s40168-016-0225-7
																Bifidobacterium catenulatum	Baseline	FollUp	14	0.960192	33.1807	Decreased	Tested	0.866667	0.866667	Lower at Baseline	Kang et al., 2017 https://doi.org/10.1186/s40168-016-0225-7
																Bifidobacterium catenulatum	Vanco	IniMTT	10	0.966055	14.5628	Decreased	Tested	1	1	Lower at Baseline	Kang et al., 2017 https://doi.org/10.1186/s40168-016-0225-7
																Bifidobacterium catenulatum	Vanco	EndMTT	11	0.827384	6.68699	Decreased	Tested	0.466667	0.466667	Lower at Baseline	Kang et al., 2017 https://doi.org/10.1186/s40168-016-0225-7
																Bifidobacterium catenulatum	Vanco	FollUp	10	0.749908	0.808938	Decreased	Tested	0.333333	0.333333	Lower at Baseline	Kang et al., 2017 https://doi.org/10.1186/s40168-016-0225-7
																Bifidobacterium catenulatum	IniMTT	EndMTT	0	0.0898562	6.87466	Increased	Tested	-1	1	Lower at Baseline	Kang et al., 2017 https://doi.org/10.1186/s40168-016-0225-7
																Bifidobacterium catenulatum	IniMTT	FollUp	0	0.0215572	12.0055	Increased	Tested	-1	1	Lower at Baseline	Kang et al., 2017 https://doi.org/10.1186/s40168-016-0225-7
																Bifidobacterium catenulatum	EndMTT	FollUp	2	0.0690054	5.50963	Increased	Tested	-0.733333	0.733333	Lower at Baseline	Kang et al., 2017 https://doi.org/10.1186/s40168-016-0225-7
																Bifidobacterium_u_s	Baseline	Vanco	14	0.960192	22.9783	Decreased	Tested	0.866667	0.866667	Lower at Baseline	Kang et al., 2017 https://doi.org/10.1186/s40168-016-0225-7
																Bifidobacterium_u_s	Baseline	IniMTT	14	0.960192	35.7141	Decreased	Tested	0.866667	0.866667	Lower at Baseline	Kang et al., 2017 https://doi.org/10.1186/s40168-016-0225-7
																Bifidobacterium_u_s	Baseline	EndMTT	15	0.978443	30.2359	Decreased	Tested	1	1	Lower at Baseline	Kang et al., 2017 https://doi.org/10.1186/s40168-016-0225-7
																Bifidobacterium_u_s	Baseline	FollUp	15	0.978443	26.7999	Decreased	Tested	1	1	Lower at Baseline	Kang et al., 2017 https://doi.org/10.1186/s40168-016-0225-7
																Bifidobacterium_u_s	Vanco	IniMTT	2	0.67264	10.3562	Decreased	Tested	0.333333	0.333333	Lower at Baseline	Kang et al., 2017 https://doi.org/10.1186/s40168-016-0225-7
																Bifidobacterium_u_s	Vanco	EndMTT	4	0.70351	5.90158	Decreased	Tested	0.333333	0.333333	Lower at Baseline	Kang et al., 2017 https://doi.org/10.1186/s40168-016-0225-7
																Bifidobacterium_u_s	Vanco	FollUp	4	0.3575	3.10754	Decreased	Tested	-0.2	0.2	Lower at Baseline	Kang et al., 2017 https://doi.org/10.1186/s40168-016-0225-7
																Bifidobacterium_u_s	IniMTT	EndMTT	1	0.32736	4.03657	Increased	Tested	-0.333333	0.333333	Lower at Baseline	Kang et al., 2017 https://doi.org/10.1186/s40168-016-0225-7
																Bifidobacterium_u_s	IniMTT	FollUp	2	0.29649	6.56841	Increased	Tested	-0.333333	0.333333	Lower at Baseline	Kang et al., 2017 https://doi.org/10.1186/s40168-016-0225-7
																Bifidobacterium_u_s	EndMTT	FollUp	0	0.0544047	2.63834	Increased	Tested	-1	1	Lower at Baseline	Kang et al., 2017 https://doi.org/10.1186/s40168-016-0225-7
																Bifidobacterium longum	Baseline	Vanco	18	0.953125	45.7595	Decreased	Tested	0.714286	0.714286	Lower at Baseline	Kang et al., 2017 https://doi.org/10.1186/s40168-016-0225-7
																Bifidobacterium longum	Baseline	IniMTT	12	0.887542	51.7967	Decreased	Tested	0.6	0.6	Lower at Baseline	Kang et al., 2017 https://doi.org/10.1186/s40168-016-0225-7
																Bifidobacterium longum	Baseline	EndMTT	12	0.887542	36.2005	Decreased	Tested	0.6	0.6	Lower at Baseline	Kang et al., 2017 https://doi.org/10.1186/s40168-016-0225-7
																Bifidobacterium longum	Baseline	FollUp	10	0.749908	8.31194	Decreased	Tested	0.333333	0.333333	Lower at Baseline	Kang et al., 2017 https://doi.org/10.1186/s40168-016-0225-7
																Bifidobacterium longum	Vanco	IniMTT	11	0.578125	4.14187	Decreased	Tested	0.047619	0.047619	Lower at Baseline	Kang et al., 2017 https://doi.org/10.1186/s40168-016-0225-7
																Bifidobacterium longum	Vanco	EndMTT	10	0.5	6.55809	Increased	Tested	-0.047619	0.047619	Lower at Baseline	Kang et al., 2017 https://doi.org/10.1186/s40168-016-0225-7
																Bifidobacterium longum	Vanco	FollUp	7	0.28125	25.6913	Increased	Tested	-0.333333	0.333333	Lower at Baseline	Kang et al., 2017 https://doi.org/10.1186/s40168-016-0225-7
																Bifidobacterium longum	IniMTT	EndMTT	3	0.232604	10.2744	Increased	Tested	-0.4	0.4	Lower at Baseline	Kang et al., 2017 https://doi.org/10.1186/s40168-016-0225-7
																Bifidobacterium longum	IniMTT	FollUp	5	0.250092	28.6467	Increased	Tested	-0.333333	0.333333	Lower at Baseline	Kang et al., 2017 https://doi.org/10.1186/s40168-016-0225-7
																Bifidobacterium longum	EndMTT	FollUp	6	0.342915	20.4761	Increased	Tested	-0.2	0.2	Lower at Baseline	Kang et al., 2017 https://doi.org/10.1186/s40168-016-0225-7
																Bifidobacterium merycicum	Baseline	Vanco	5	0.857475	0.822344	Decreased	Tested	0.666667	0.666667	Lower at Baseline	Kang et al., 2017 https://doi.org/10.1186/s40168-016-0225-7
																Bifidobacterium merycicum	Baseline	IniMTT	6	0.945595	2.19439	Decreased	Tested	1	1	Lower at Baseline	Kang et al., 2017 https://doi.org/10.1186/s40168-016-0225-7
																Bifidobacterium merycicum	Baseline	EndMTT	6	0.945595	0.84004	Decreased	Tested	1	1	Lower at Baseline	Kang et al., 2017 https://doi.org/10.1186/s40168-016-0225-7
																Bifidobacterium merycicum	Baseline	FollUp	3	0.5	2.9444	Increased	Tested	0	0	Lower at Baseline	Kang et al., 2017 https://doi.org/10.1186/s40168-016-0225-7
																Bifidobacterium merycicum	Vanco	IniMTT	1	0.841345	1.36085	Decreased	Tested	1	1	Lower at Baseline	Kang et al., 2017 https://doi.org/10.1186/s40168-016-0225-7
																Bifidobacterium merycicum	Vanco	EndMTT	2	0.67264	0.0175522	Decreased	Tested	0.333333	0.333333	Lower at Baseline	Kang et al., 2017 https://doi.org/10.1186/s40168-016-0225-7
																Bifidobacterium merycicum	Vanco	FollUp	1	0.32736	3.73602	Increased	Tested	-0.333333	0.333333	Lower at Baseline	Kang et al., 2017 https://doi.org/10.1186/s40168-016-0225-7
																Bifidobacterium merycicum	IniMTT	EndMTT	0	0.0898562	1.32526	Increased	Tested	-1	1	Lower at Baseline	Kang et al., 2017 https://doi.org/10.1186/s40168-016-0225-7
																Bifidobacterium merycicum	IniMTT	FollUp	0	0.158655	5.02844	Increased	Tested	-1	1	Lower at Baseline	Kang et al., 2017 https://doi.org/10.1186/s40168-016-0225-7
																Bifidobacterium merycicum	EndMTT	FollUp	1	0.32736	3.75291	Increased	Tested	-0.333333	0.333333	Lower at Baseline	Kang et al., 2017 https://doi.org/10.1186/s40168-016-0225-7
																Bifidobacterium pseudocatenulatum	Baseline	Vanco	14	0.960192	45.3412	Decreased	Tested	0.866667	0.866667	Lower at Baseline	Kang et al., 2017 https://doi.org/10.1186/s40168-016-0225-7
																Bifidobacterium pseudocatenulatum	Baseline	IniMTT	15	0.978443	81.0176	Decreased	Tested	1	1	Lower at Baseline	Kang et al., 2017 https://doi.org/10.1186/s40168-016-0225-7
																Bifidobacterium pseudocatenulatum	Baseline	EndMTT	14	0.960192	63.5291	Decreased	Tested	0.866667	0.866667	Lower at Baseline	Kang et al., 2017 https://doi.org/10.1186/s40168-016-0225-7
																Bifidobacterium pseudocatenulatum	Baseline	FollUp	15	0.978443	66.2237	Decreased	Tested	1	1	Lower at Baseline	Kang et al., 2017 https://doi.org/10.1186/s40168-016-0225-7
																Bifidobacterium pseudocatenulatum	Vanco	IniMTT	3	0.910144	24.5466	Decreased	Tested	1	1	Lower at Baseline	Kang et al., 2017 https://doi.org/10.1186/s40168-016-0225-7
																Bifidobacterium pseudocatenulatum	Vanco	EndMTT	4	0.70351	12.5139	Decreased	Tested	0.333333	0.333333	Lower at Baseline	Kang et al., 2017 https://doi.org/10.1186/s40168-016-0225-7
																Bifidobacterium pseudocatenulatum	Vanco	FollUp	4	0.70351	14.3679	Decreased	Tested	0.333333	0.333333	Lower at Baseline	Kang et al., 2017 https://doi.org/10.1186/s40168-016-0225-7
																Bifidobacterium pseudocatenulatum	IniMTT	EndMTT	0	0.158655	9.66121	Increased	Tested	-1	1	Lower at Baseline	Kang et al., 2017 https://doi.org/10.1186/s40168-016-0225-7
																Bifidobacterium pseudocatenulatum	IniMTT	FollUp	0	0.158655	8.17259	Increased	Tested	-1	1	Lower at Baseline	Kang et al., 2017 https://doi.org/10.1186/s40168-016-0225-7
																Bifidobacterium pseudocatenulatum	EndMTT	FollUp	1	0.841345	1.64782	Decreased	Tested	1	1	Lower at Baseline	Kang et al., 2017 https://doi.org/10.1186/s40168-016-0225-7
																Bifidobacterium ruminantium	Baseline	Vanco	6	0.6425	1.97293	Decreased	Tested	0.2	0.2	Lower at Baseline	Kang et al., 2017 https://doi.org/10.1186/s40168-016-0225-7
																Bifidobacterium ruminantium	Baseline	IniMTT	13	0.930995	12.3602	Decreased	Tested	0.733333	0.733333	Lower at Baseline	Kang et al., 2017 https://doi.org/10.1186/s40168-016-0225-7
																Bifidobacterium ruminantium	Baseline	EndMTT	9	0.927936	9.00755	Decreased	Tested	0.8	0.8	Lower at Baseline	Kang et al., 2017 https://doi.org/10.1186/s40168-016-0225-7
																Bifidobacterium ruminantium	Baseline	FollUp	9	0.927936	8.55451	Decreased	Tested	0.8	0.8	Lower at Baseline	Kang et al., 2017 https://doi.org/10.1186/s40168-016-0225-7
																Bifidobacterium ruminantium	Vanco	IniMTT	12	0.887542	10.1863	Decreased	Tested	0.6	0.6	Lower at Baseline	Kang et al., 2017 https://doi.org/10.1186/s40168-016-0225-7
																Bifidobacterium ruminantium	Vanco	EndMTT	7	0.767396	6.89851	Decreased	Tested	0.4	0.4	Lower at Baseline	Kang et al., 2017 https://doi.org/10.1186/s40168-016-0225-7
																Bifidobacterium ruminantium	Vanco	FollUp	7	0.767396	6.45424	Decreased	Tested	0.4	0.4	Lower at Baseline	Kang et al., 2017 https://doi.org/10.1186/s40168-016-0225-7
																Bifidobacterium ruminantium	IniMTT	EndMTT	1	0.0720635	2.98382	Increased	Tested	-0.8	0.8	Lower at Baseline	Kang et al., 2017 https://doi.org/10.1186/s40168-016-0225-7
																Bifidobacterium ruminantium	IniMTT	FollUp	2	0.136661	3.38702	Increased	Tested	-0.6	0.6	Lower at Baseline	Kang et al., 2017 https://doi.org/10.1186/s40168-016-0225-7
																Bifidobacterium ruminantium	EndMTT	FollUp	1	0.32736	0.4156	Increased	Tested	-0.333333	0.333333	Lower at Baseline	Kang et al., 2017 https://doi.org/10.1186/s40168-016-0225-7
																Bifidobacterium adolescentis	pl_Baseline	pl_NoVanco	0	0.0898562	5.45632	Increased	Tested	-1	1	Lower at Baseline	Kang et al., 2017 https://doi.org/10.1186/s40168-016-0225-7
																Bifidobacterium adolescentis	pl_Baseline	pl_IniPart1	2	0.67264	0.152586	Decreased	Tested	0.333333	0.333333	Lower at Baseline	Kang et al., 2017 https://doi.org/10.1186/s40168-016-0225-7
																Bifidobacterium adolescentis	pl_NoVanco	pl_IniPart1	2	0.67264	5.9326	Decreased	Tested	0.333333	0.333333	Lower at Baseline	Kang et al., 2017 https://doi.org/10.1186/s40168-016-0225-7
																Bifidobacterium angulatum	pl_Baseline	pl_NoVanco			0	No change	Identical Values			Lower at Baseline	Kang et al., 2017 https://doi.org/10.1186/s40168-016-0225-7
																Bifidobacterium angulatum	pl_Baseline	pl_IniPart1	1	0.841345	0.716432	Decreased	Tested	1	1	Lower at Baseline	Kang et al., 2017 https://doi.org/10.1186/s40168-016-0225-7
																Bifidobacterium angulatum	pl_NoVanco	pl_IniPart1	1	0.841345	0.716432	Decreased	Tested	1	1	Lower at Baseline	Kang et al., 2017 https://doi.org/10.1186/s40168-016-0225-7
																Bifidobacterium animalis	pl_Baseline	pl_NoVanco	0	0.158655	0.344939	Increased	Tested	-1	1	Lower at Baseline	Kang et al., 2017 https://doi.org/10.1186/s40168-016-0225-7
																Bifidobacterium animalis	pl_Baseline	pl_IniPart1	0	0.158655	0.949528	Increased	Tested	-1	1	Lower at Baseline	Kang et al., 2017 https://doi.org/10.1186/s40168-016-0225-7
																Bifidobacterium animalis	pl_NoVanco	pl_IniPart1	0	0.158655	0.606682	Increased	Tested	-1	1	Lower at Baseline	Kang et al., 2017 https://doi.org/10.1186/s40168-016-0225-7
																Bifidobacterium bifidum	pl_Baseline	pl_NoVanco			0	No change	Identical Values			Lower at Baseline	Kang et al., 2017 https://doi.org/10.1186/s40168-016-0225-7
																Bifidobacterium bifidum	pl_Baseline	pl_IniPart1	0	0.158655	0.344939	Increased	Tested	-1	1	Lower at Baseline	Kang et al., 2017 https://doi.org/10.1186/s40168-016-0225-7
																Bifidobacterium bifidum	pl_NoVanco	pl_IniPart1	0	0.158655	0.344939	Increased	Tested	-1	1	Lower at Baseline	Kang et al., 2017 https://doi.org/10.1186/s40168-016-0225-7
																Bifidobacterium breve	pl_Baseline	pl_NoVanco	1	0.841345	3.58198	Decreased	Tested	1	1	Lower at Baseline	Kang et al., 2017 https://doi.org/10.1186/s40168-016-0225-7
																Bifidobacterium breve	pl_Baseline	pl_IniPart1	1	0.841345	3.58198	Decreased	Tested	1	1	Lower at Baseline	Kang et al., 2017 https://doi.org/10.1186/s40168-016-0225-7
																Bifidobacterium breve	pl_NoVanco	pl_IniPart1			0	No change	Identical Values			Lower at Baseline	Kang et al., 2017 https://doi.org/10.1186/s40168-016-0225-7
																Bifidobacterium catenulatum	pl_Baseline	pl_NoVanco	1	0.32736	0.45588	Increased	Tested	-0.333333	0.333333	Lower at Baseline	Kang et al., 2017 https://doi.org/10.1186/s40168-016-0225-7
																Bifidobacterium catenulatum	pl_Baseline	pl_IniPart1	1	0.32736	10.0512	Increased	Tested	-0.333333	0.333333	Lower at Baseline	Kang et al., 2017 https://doi.org/10.1186/s40168-016-0225-7
																Bifidobacterium catenulatum	pl_NoVanco	pl_IniPart1	1	0.32736	9.63929	Increased	Tested	-0.333333	0.333333	Lower at Baseline	Kang et al., 2017 https://doi.org/10.1186/s40168-016-0225-7
																Bifidobacterium_u_s	pl_Baseline	pl_NoVanco	1	0.841345	0.13209	Decreased	Tested	1	1	Lower at Baseline	Kang et al., 2017 https://doi.org/10.1186/s40168-016-0225-7
																Bifidobacterium_u_s	pl_Baseline	pl_IniPart1	0	0.0898562	10.7745	Increased	Tested	-1	1	Lower at Baseline	Kang et al., 2017 https://doi.org/10.1186/s40168-016-0225-7
																Bifidobacterium_u_s	pl_NoVanco	pl_IniPart1	0	0.0898562	10.8922	Increased	Tested	-1	1	Lower at Baseline	Kang et al., 2017 https://doi.org/10.1186/s40168-016-0225-7
																Bifidobacterium longum	pl_Baseline	pl_NoVanco	1	0.32736	0.535779	Increased	Tested	-0.333333	0.333333	Lower at Baseline	Kang et al., 2017 https://doi.org/10.1186/s40168-016-0225-7
																Bifidobacterium longum	pl_Baseline	pl_IniPart1	2	0.375	2.25848	Increased	Tested	-0.333333	0.333333	Lower at Baseline	Kang et al., 2017 https://doi.org/10.1186/s40168-016-0225-7
																Bifidobacterium longum	pl_NoVanco	pl_IniPart1	2	0.375	1.73198	Increased	Tested	-0.333333	0.333333	Lower at Baseline	Kang et al., 2017 https://doi.org/10.1186/s40168-016-0225-7
																Bifidobacterium merycicum	pl_Baseline	pl_NoVanco			0	No change	Identical Values			Lower at Baseline	Kang et al., 2017 https://doi.org/10.1186/s40168-016-0225-7
																Bifidobacterium merycicum	pl_Baseline	pl_IniPart1			0	No change	Identical Values			Lower at Baseline	Kang et al., 2017 https://doi.org/10.1186/s40168-016-0225-7
																Bifidobacterium merycicum	pl_NoVanco	pl_IniPart1			0	No change	Identical Values			Lower at Baseline	Kang et al., 2017 https://doi.org/10.1186/s40168-016-0225-7
																Bifidobacterium pseudocatenulatum	pl_Baseline	pl_NoVanco	1	0.841345	5.66592	Decreased	Tested	1	1	Lower at Baseline	Kang et al., 2017 https://doi.org/10.1186/s40168-016-0225-7
																Bifidobacterium pseudocatenulatum	pl_Baseline	pl_IniPart1	0	0.158655	14.1523	Increased	Tested	-1	1	Lower at Baseline	Kang et al., 2017 https://doi.org/10.1186/s40168-016-0225-7
																Bifidobacterium pseudocatenulatum	pl_NoVanco	pl_IniPart1	0	0.158655	18.7555	Increased	Tested	-1	1	Lower at Baseline	Kang et al., 2017 https://doi.org/10.1186/s40168-016-0225-7
																Bifidobacterium ruminantium	pl_Baseline	pl_NoVanco	0	0.0898562	1.25784	Increased	Tested	-1	1	Lower at Baseline	Kang et al., 2017 https://doi.org/10.1186/s40168-016-0225-7
																Bifidobacterium ruminantium	pl_Baseline	pl_IniPart1	3	0.910144	2.31406	Decreased	Tested	1	1	Lower at Baseline	Kang et al., 2017 https://doi.org/10.1186/s40168-016-0225-7
																Bifidobacterium ruminantium	pl_NoVanco	pl_IniPart1	3	0.910144	3.61741	Decreased	Tested	1	1	Lower at Baseline	Kang et al., 2017 https://doi.org/10.1186/s40168-016-0225-7

## Sheet: Metacyc-GO_BaselineVsTD_shotgun
Feature	Mann-Whitney U	p-value	RankBiserial_r	Rank_Biserial_r_Absolute_value	EnrichedCohort
2-amino-4-hydroxy-6-hydroxymethyldihydropteridine diphosphokinase activity	119	5.77861e-06	1	1	Baseline
folic acid-containing compound biosynthetic process	119	5.77861e-06	1	1	Baseline
chorismate biosynthetic process	0	5.77861e-06	-1	1	TD
sucrose metabolic process	1	1.15572e-05	-0.983193	0.983193	TD
aromatic amino acid family biosynthetic process	1	1.15572e-05	-0.983193	0.983193	TD
threonine biosynthetic process	1	1.15572e-05	-0.983193	0.983193	TD
biotin transmembrane transporter activity	2	2.31144e-05	-0.966387	0.966387	TD
S-adenosylmethionine:2-demethylmenaquinol-7 methyltransferase activity	117	2.31144e-05	0.966387	0.966387	Baseline
acetolactate synthase activity	3	4.04503e-05	-0.94958	0.94958	TD
beta-N-acetylhexosaminidase activity	116	4.04503e-05	0.94958	0.94958	Baseline
beta-fructofuranosidase activity	3	4.04503e-05	-0.94958	0.94958	TD
cation transmembrane transporter activity	116	4.04503e-05	0.94958	0.94958	Baseline
ATPase-coupled sulfate transmembrane transporter activity	3	4.04503e-05	-0.94958	0.94958	TD
C4-dicarboxylate transmembrane transporter activity	116	4.04503e-05	0.94958	0.94958	Baseline
glutamate synthase (NADPH) activity	4	6.93433e-05	-0.932773	0.932773	TD
isopentenyl-diphosphate delta-isomerase activity	4	6.93433e-05	-0.932773	0.932773	TD
mRNA processing	115	6.93433e-05	0.932773	0.932773	Baseline
rRNA methyltransferase activity	4	6.93433e-05	-0.932773	0.932773	TD
guanosine tetraphosphate metabolic process	4	6.93433e-05	-0.932773	0.932773	TD
1,4-alpha-glucan branching enzyme activity (using a glucosylated glycogenin as primer for glycogen synthesis)	4	6.93433e-05	-0.932773	0.932773	TD
neurotransmitter:sodium symporter activity	5	0.000109794	-0.915966	0.915966	TD
cellular iron ion homeostasis	114	0.000109794	0.915966	0.915966	Baseline
ferric iron binding	114	0.000109794	0.915966	0.915966	Baseline
glycerophosphodiester phosphodiesterase activity	114	0.000109794	0.915966	0.915966	Baseline
glucose transmembrane transporter activity	17	0.000172616	-0.714286	0.714286	TD
citrulline biosynthetic process	17	0.000172616	-0.714286	0.714286	TD
endonuclease activity	113	0.000173358	0.89916	0.89916	Baseline
protein folding	6	0.000173358	-0.89916	0.89916	TD
1-deoxy-D-xylulose-5-phosphate synthase activity	6	0.000173358	-0.89916	0.89916	TD
L(+)-tartrate dehydratase activity	6	0.000173358	-0.89916	0.89916	TD
tagatose-6-phosphate kinase activity	6	0.000173358	-0.89916	0.89916	TD
molybdopterin adenylyltransferase activity	6	0.000173358	-0.89916	0.89916	TD
methionyl-tRNA formyltransferase activity	7	0.000260037	-0.882353	0.882353	TD
sister chromatid cohesion	7	0.000260037	-0.882353	0.882353	TD
cytochrome complex assembly	112	0.000260037	0.882353	0.882353	Baseline
NADHX epimerase activity	7	0.000260037	-0.882353	0.882353	TD
tryptophan biosynthetic process	8	0.000381388	-0.865546	0.865546	TD
lactoylglutathione lyase activity	8	0.000381388	-0.865546	0.865546	TD
shikimate kinase activity	8	0.000381388	-0.865546	0.865546	TD
aspartate-tRNA ligase activity	8	0.000381388	-0.865546	0.865546	TD
dipeptidyl-peptidase activity	111	0.000381388	0.865546	0.865546	Baseline
ammonium transmembrane transporter activity	8	0.000381388	-0.865546	0.865546	TD
rhamnulose-1-phosphate aldolase activity	8	0.000381388	-0.865546	0.865546	TD
nitrogenase activity	8	0.000381388	-0.865546	0.865546	TD
4-hydroxybenzoyl-CoA reductase activity	8	0.000381388	-0.865546	0.865546	TD
carbonyl sulfide nitrogenase activity	8	0.000381388	-0.865546	0.865546	TD
carbohydrate binding	111	0.000381388	0.865546	0.865546	Baseline
propanediol catabolic process	8	0.000381388	-0.865546	0.865546	TD
3-oxo-glutaryl-acp methyl ester reductase activity	8	0.000381388	-0.865546	0.865546	TD
3-oxo-pimeloyl-acp methyl ester reductase activity	8	0.000381388	-0.865546	0.865546	TD
enzyme-directed rRNA 2'-O-methylation	9	0.000543189	-0.848739	0.848739	TD
1,4-alpha-glucan branching enzyme activity	9	0.000543189	-0.848739	0.848739	TD
dihydrolipoyl dehydrogenase activity	110	0.000543189	0.848739	0.848739	Baseline
peroxidase activity	110	0.000543189	0.848739	0.848739	Baseline
aspartyl-tRNA aminoacylation	9	0.000543189	-0.848739	0.848739	TD
2-hydroxy-3-oxopropionate reductase activity	9	0.000543189	-0.848739	0.848739	TD
GTP diphosphokinase activity	9	0.000543189	-0.848739	0.848739	TD
glutamate-1-semialdehyde 2,1-aminomutase activity	9	0.000543189	-0.848739	0.848739	TD
undecaprenyl-diphosphatase activity	9	0.000543189	-0.848739	0.848739	TD
aspartate-tRNA(Asn) ligase activity	9	0.000543189	-0.848739	0.848739	TD
rRNA (cytosine-2'-O-)-methyltransferase activity	9	0.000543189	-0.848739	0.848739	TD
trehalose-phosphatase activity	18	0.000619359	-0.697479	0.697479	TD
betaine reductase activity	113	0.000722751	0.89916	0.89916	Baseline
glycine dehydrogenase (decarboxylating) activity	109	0.000762777	0.831933	0.831933	Baseline
shikimate 3-dehydrogenase (NADP+) activity	10	0.000762777	-0.831933	0.831933	TD
cell	109	0.000762777	0.831933	0.831933	Baseline
response to oxidative stress	109	0.000762777	0.831933	0.831933	Baseline
cysteine desulfurase activity	10	0.000762777	-0.831933	0.831933	TD
rRNA (cytosine-N4-)-methyltransferase activity	10	0.000762777	-0.831933	0.831933	TD
sulfur compound binding	10	0.000762777	-0.831933	0.831933	TD
ATPase-coupled heme transmembrane transporter activity	12	0.000859732	-0.798319	0.798319	TD
helicase activity	108	0.00104593	0.815126	0.815126	Baseline
branched-chain amino acid metabolic process	11	0.00104593	-0.815126	0.815126	TD
DNA polymerase III complex	11	0.00104593	-0.815126	0.815126	TD
phosphotransferase activity, alcohol group as acceptor	108	0.00104593	0.815126	0.815126	Baseline
proton transmembrane transport	108	0.00104593	0.815126	0.815126	Baseline
beta-mannosidase activity	25.5	0.00105215	-0.571429	0.571429	TD
galactose transmembrane transporter activity	25.5	0.00105215	-0.571429	0.571429	TD
base-excision repair, DNA ligation	25.5	0.00105215	-0.571429	0.571429	TD
tRNA metabolic process	25.5	0.00105215	-0.571429	0.571429	TD
arabinose isomerase activity	25.5	0.00105215	-0.571429	0.571429	TD
10-formyltetrahydrofolate biosynthetic process	25.5	0.00105215	-0.571429	0.571429	TD
glycine binding	25.5	0.00105215	-0.571429	0.571429	TD
oxidoreductase activity, acting on single donors with incorporation of molecular oxygen, incorporation of two atoms of oxygen	25.5	0.00105215	-0.571429	0.571429	TD
D-arabinose catabolic process	25.5	0.00105215	-0.571429	0.571429	TD
glucuronoarabinoxylan endo-1,4-beta-xylanase activity	25.5	0.00105215	-0.571429	0.571429	TD
D-xylose catabolic process	25.5	0.00105215	-0.571429	0.571429	TD
undecaprenyl-phosphate mannosyltransferase activity	25.5	0.00105215	-0.571429	0.571429	TD
D-tyrosyl-tRNA(Tyr) deacylase activity	25.5	0.00105215	-0.571429	0.571429	TD
rRNA (uridine-C5-)-methyltransferase activity	25.5	0.00105215	-0.571429	0.571429	TD
respirasome	25.5	0.00105215	-0.571429	0.571429	TD
tyrosine 2,3-aminomutase activity	25.5	0.00105215	-0.571429	0.571429	TD
pseudouridylate synthase activity	111	0.00118749	0.865546	0.865546	Baseline
phosphoprotein phosphatase activity	12	0.00142154	-0.798319	0.798319	TD
galactose binding	12	0.00142154	-0.798319	0.798319	TD
glycine catabolic process	107	0.00142154	0.798319	0.798319	Baseline
protein lipoylation	107	0.00142154	0.798319	0.798319	Baseline
cobalt-factor II C20-methyltransferase activity	12	0.00142154	-0.798319	0.798319	TD
ATP metabolic process	107	0.00142154	0.798319	0.798319	Baseline
DNA biosynthetic process	107	0.00142154	0.798319	0.798319	Baseline
urea transmembrane transporter activity	21	0.00151117	-0.647059	0.647059	TD
alanine dehydrogenase activity	106	0.00189538	0.781513	0.781513	Baseline
carbohydrate metabolic process	106	0.00189538	0.781513	0.781513	Baseline
L-aspartate oxidase activity	13	0.00189538	-0.781513	0.781513	TD
hydroxymethylpyrimidine kinase activity	13	0.00189538	-0.781513	0.781513	TD
phosphoenolpyruvate-protein phosphotransferase activity	13	0.00189538	-0.781513	0.781513	TD
serine-type D-Ala-D-Ala carboxypeptidase activity	13	0.00189538	-0.781513	0.781513	TD
transferase activity, transferring acyl groups	106	0.00189538	0.781513	0.781513	Baseline
glucosamine catabolic process	22	0.00200803	-0.630252	0.630252	TD
acetoacetate-CoA ligase activity	22	0.00200803	-0.630252	0.630252	TD
oxidoreductase activity, acting on NAD(P)H, quinone or similar compound as acceptor	107	0.00235752	0.798319	0.798319	Baseline
chromosome	14	0.00250214	-0.764706	0.764706	TD
polyphosphate biosynthetic process	14	0.00250214	-0.764706	0.764706	TD
3'-5' exonuclease activity	14	0.00250214	-0.764706	0.764706	TD
8-oxo-7,8-dihydroguanosine triphosphate pyrophosphatase activity	14	0.00250214	-0.764706	0.764706	TD
1-phosphofructokinase activity	14	0.00250214	-0.764706	0.764706	TD
polyphosphate kinase activity	14	0.00250214	-0.764706	0.764706	TD
polyphosphate kinase complex	14	0.00250214	-0.764706	0.764706	TD
methionine gamma-lyase activity	14	0.00250214	-0.764706	0.764706	TD
protein carbamoylation	14	0.00250214	-0.764706	0.764706	TD
L-cysteine desulfhydrase activity	14	0.00250214	-0.764706	0.764706	TD
GMP synthase activity	23	0.00265098	-0.613445	0.613445	TD
aspartate family amino acid biosynthetic process	23	0.00265098	-0.613445	0.613445	TD
aminoacyl-tRNA synthetase multienzyme complex	23	0.00265098	-0.613445	0.613445	TD
putrescine biosynthetic process from arginine	23	0.00265098	-0.613445	0.613445	TD
positive regulation of oxidative phosphorylation	23	0.00265098	-0.613445	0.613445	TD
denitrification pathway	23	0.00265098	-0.613445	0.613445	TD
protein-malonyllysine demalonylase activity	19.5	0.00279736	-0.672269	0.672269	TD
protein-succinyllysine desuccinylase activity	19.5	0.00279736	-0.672269	0.672269	TD
acetylglutamate kinase activity	15	0.00325914	-0.747899	0.747899	TD
amidophosphoribosyltransferase activity	15	0.00325914	-0.747899	0.747899	TD
anthranilate phosphoribosyltransferase activity	15	0.00325914	-0.747899	0.747899	TD
ferrochelatase activity	15	0.00325914	-0.747899	0.747899	TD
cob(I)yrinic acid a,c-diamide adenosyltransferase activity	15	0.00325914	-0.747899	0.747899	TD
polyhedral organelle	15	0.00325914	-0.747899	0.747899	TD
6-phospho-beta-galactosidase activity	15	0.00325914	-0.747899	0.747899	TD
L-alanine catabolic process	104	0.00325914	0.747899	0.747899	Baseline
FMN reductase (NADH) activity	15	0.00325914	-0.747899	0.747899	TD
beta-maltose 4-alpha-glucanotransferase activity	15	0.00325914	-0.747899	0.747899	TD
endoplasmic reticulum to Golgi vesicle-mediated transport	104	0.00410012	0.747899	0.747899	Baseline
COPII vesicle coat	104	0.00410012	0.747899	0.747899	Baseline
dCMP deaminase activity	16	0.00420683	-0.731092	0.731092	TD
3-oxoacyl-acyl-carrier-protein reductase (NADPH) activity	16	0.00420683	-0.731092	0.731092	TD
glycine hydroxymethyltransferase activity	103	0.00420683	0.731092	0.731092	Baseline
cytoplasm	16	0.00420683	-0.731092	0.731092	TD
Mo-molybdopterin cofactor biosynthetic process	16	0.00420683	-0.731092	0.731092	TD
peptide-methionine (S)-S-oxide reductase activity	103	0.00420683	0.731092	0.731092	Baseline
penicillin binding	16	0.00420683	-0.731092	0.731092	TD
exodeoxyribonuclease III activity	16	0.00420683	-0.731092	0.731092	TD
phosphoglycolate phosphatase activity	16	0.00420683	-0.731092	0.731092	TD
NADH peroxidase activity	16	0.00420683	-0.731092	0.731092	TD
hydrolase activity	103	0.00420683	0.731092	0.731092	Baseline
hydrolase activity, acting on acid anhydrides, in phosphorus-containing anhydrides	16	0.00420683	-0.731092	0.731092	TD
'de novo' GDP-L-fucose biosynthetic process	103	0.00420683	0.731092	0.731092	Baseline
cell redox homeostasis	103	0.00420683	0.731092	0.731092	Baseline
GDP-L-fucose synthase activity	103	0.00420683	0.731092	0.731092	Baseline
very-long-chain-(S)-2-hydroxy-acid oxidase activity	16	0.00420683	-0.731092	0.731092	TD
long-chain-(S)-2-hydroxy-long-chain-acid oxidase activity	16	0.00420683	-0.731092	0.731092	TD
medium-chain-(S)-2-hydroxy-acid oxidase activity	16	0.00420683	-0.731092	0.731092	TD
metalloaminopeptidase activity	16	0.00420683	-0.731092	0.731092	TD
protein initiator methionine removal	16	0.00420683	-0.731092	0.731092	TD
rRNA base methylation	16	0.00420683	-0.731092	0.731092	TD
signal sequence binding	23	0.0044216	-0.613445	0.613445	TD
'de novo' protein folding	21.5	0.00454228	-0.638655	0.638655	TD
GroEL-GroES complex	21.5	0.00454228	-0.638655	0.638655	TD
pilus	104	0.00515946	0.747899	0.747899	Baseline
acetyl-CoA:L-glutamate N-acetyltransferase activity	17	0.00536833	-0.714286	0.714286	TD
glycogen biosynthetic process	17	0.00536833	-0.714286	0.714286	TD
DNA methylation	102	0.00536833	0.714286	0.714286	Baseline
potassium ion transport	102	0.00536833	0.714286	0.714286	Baseline
iron ion transport	102	0.00536833	0.714286	0.714286	Baseline
UDP-N-acetylglucosamine 2-epimerase activity	102	0.00536833	0.714286	0.714286	Baseline
glucose-1-phosphate adenylyltransferase activity	17	0.00536833	-0.714286	0.714286	TD
purine nucleobase biosynthetic process	17	0.00536833	-0.714286	0.714286	TD
excinuclease ABC activity	17	0.00536833	-0.714286	0.714286	TD
cobalt ion transmembrane transporter activity	102	0.00536833	0.714286	0.714286	Baseline
glutamate synthase (ferredoxin) activity	17	0.00536833	-0.714286	0.714286	TD
betaine-homocysteine S-methyltransferase activity	17	0.00536833	-0.714286	0.714286	TD
lysyltransferase activity	17	0.00536833	-0.714286	0.714286	TD
detection of stimulus	17	0.00536833	-0.714286	0.714286	TD
'de novo' L-methionine biosynthetic process	102	0.00536833	0.714286	0.714286	Baseline
cytoplasmic translational termination	34	0.00574254	-0.428571	0.428571	TD
iduronate-2-sulfatase activity	34	0.00574254	-0.428571	0.428571	TD
translational initiation	34	0.00574254	-0.428571	0.428571	TD
histidine catabolic process	34	0.00574254	-0.428571	0.428571	TD
ribonuclease H2 complex	34	0.00574254	-0.428571	0.428571	TD
ribosome disassembly	34	0.00574254	-0.428571	0.428571	TD
aspartic acid methylthiotransferase activity	34	0.00574254	-0.428571	0.428571	TD
thymidine metabolic process	34	0.00574254	-0.428571	0.428571	TD
tyrosine phenol-lyase activity	34	0.00574254	-0.428571	0.428571	TD
purine nucleobase metabolic process	34	0.00574254	-0.428571	0.428571	TD
phosphatidic acid biosynthetic process	34	0.00574254	-0.428571	0.428571	TD
lipopolysaccharide transport	34	0.00574254	-0.428571	0.428571	TD
protein autophosphorylation	34	0.00574254	-0.428571	0.428571	TD
rRNA (guanosine-2'-O-)-methyltransferase activity	34	0.00574254	-0.428571	0.428571	TD
lipopolysaccharide binding	34	0.00574254	-0.428571	0.428571	TD
ether hydrolase activity	34	0.00574254	-0.428571	0.428571	TD
mitochondrial respiratory chain complex I assembly	34	0.00574254	-0.428571	0.428571	TD
xylan alpha-1,2-glucuronosidase activity	34	0.00574254	-0.428571	0.428571	TD
4-alpha-D-(1->4)-alpha-D-glucanotrehalose trehalohydrolase activity	34	0.00574254	-0.428571	0.428571	TD
response to nicotine	34	0.00574254	-0.428571	0.428571	TD
response to cocaine	34	0.00574254	-0.428571	0.428571	TD
aspartate 4-decarboxylase activity	34	0.00574254	-0.428571	0.428571	TD
isopentenyl diphosphate biosynthetic process, methylerythritol 4-phosphate pathway involved in terpenoid biosynthetic process	34	0.00574254	-0.428571	0.428571	TD
small GTPase mediated signal transduction	34	0.00574254	-0.428571	0.428571	TD
bicellular tight junction	34	0.00574254	-0.428571	0.428571	TD
tRNA-dihydrouridine20 synthase activity	34	0.00574254	-0.428571	0.428571	TD
aminoglycoside 3''-adenylyltransferase activity	34	0.00574254	-0.428571	0.428571	TD
arsenate reductase (glutaredoxin) activity	103	0.00630361	0.731092	0.731092	Baseline
sialate O-acetylesterase activity	101	0.00679565	0.697479	0.697479	Baseline
fructose-bisphosphate aldolase activity	18	0.00679565	-0.697479	0.697479	TD
glycerol kinase activity	18	0.00679565	-0.697479	0.697479	TD
histidine ammonia-lyase activity	101	0.00679565	0.697479	0.697479	Baseline
phosphoserine phosphatase activity	18	0.00679565	-0.697479	0.697479	TD
ribonucleoside-diphosphate reductase activity, thioredoxin disulfide as acceptor	101	0.00679565	0.697479	0.697479	Baseline
thioredoxin-disulfide reductase activity	18	0.00679565	-0.697479	0.697479	TD
transketolase activity	18	0.00679565	-0.697479	0.697479	TD
uridine phosphorylase activity	18	0.00679565	-0.697479	0.697479	TD
tRNA methyltransferase activity	18	0.00679565	-0.697479	0.697479	TD
regulation of cell shape	18	0.00679565	-0.697479	0.697479	TD
methionine synthase activity	18	0.00679565	-0.697479	0.697479	TD
beta-lactamase activity	101	0.00679565	0.697479	0.697479	Baseline
carbamate kinase activity	18	0.00679565	-0.697479	0.697479	TD
guanine deaminase activity	18	0.00679565	-0.697479	0.697479	TD
peptidoglycan biosynthetic process	18	0.00679565	-0.697479	0.697479	TD
ATPase-coupled amino acid transmembrane transporter activity	18	0.00679565	-0.697479	0.697479	TD
electron transport chain	101	0.00679565	0.697479	0.697479	Baseline
alpha-1,4-glucan synthase activity	18	0.00679565	-0.697479	0.697479	TD
L-aspartate:fumarate oxidoreductase activity	18	0.00679565	-0.697479	0.697479	TD
antisigma factor binding	18	0.00679565	-0.697479	0.697479	TD
diphosphate-fructose-6-phosphate 1-phosphotransferase activity	18	0.00679565	-0.697479	0.697479	TD
trehalose biosynthetic process	22	0.00689846	-0.630252	0.630252	TD
formimidoyltetrahydrofolate cyclodeaminase activity	25	0.00718231	-0.579832	0.579832	TD
sarcosine reductase activity	101.5	0.00790779	0.705882	0.705882	Baseline
obsolete antibiotic transmembrane transporter activity	101.5	0.00790779	0.705882	0.705882	Baseline
L-iditol 2-dehydrogenase activity	19	0.00851767	-0.680672	0.680672	TD
homoserine dehydrogenase activity	19	0.00851767	-0.680672	0.680672	TD
indole-3-glycerol-phosphate synthase activity	19	0.00851767	-0.680672	0.680672	TD
ornithine carbamoyltransferase activity	19	0.00851767	-0.680672	0.680672	TD
lysyl-tRNA aminoacylation	100	0.00851767	0.680672	0.680672	Baseline
serine-type peptidase activity	100	0.00851767	0.680672	0.680672	Baseline
acetylglucosaminyltransferase activity	100	0.00851767	0.680672	0.680672	Baseline
diaminopimelate decarboxylase activity	19	0.00851767	-0.680672	0.680672	TD
acetyl-CoA carboxylase complex	19	0.00851767	-0.680672	0.680672	TD
antiporter activity	19	0.00851767	-0.680672	0.680672	TD
intramolecular transferase activity	100	0.00851767	0.680672	0.680672	Baseline
carbon-monoxide dehydrogenase (acceptor) activity	19	0.00851767	-0.680672	0.680672	TD
molybdopterin synthase complex	19	0.00851767	-0.680672	0.680672	TD
histidine catabolic process to glutamate and formamide	100	0.00851767	0.680672	0.680672	Baseline
glycerol catabolic process	19	0.00851767	-0.680672	0.680672	TD
molybdenum ion binding	19	0.00851767	-0.680672	0.680672	TD
glutamyl-tRNA(Gln) amidotransferase complex	19	0.00851767	-0.680672	0.680672	TD
kappa-carrageenase activity	19	0.00851767	-0.680672	0.680672	TD
UMP salvage	19	0.00851767	-0.680672	0.680672	TD
proton-transporting ATP synthase activity, rotational mechanism	19	0.00851767	-0.680672	0.680672	TD
cell division	19	0.00851767	-0.680672	0.680672	TD
FMN reductase (NADPH) activity	19	0.00851767	-0.680672	0.680672	TD
L-threonine catabolic process to propionate	19	0.00851767	-0.680672	0.680672	TD
ATPase-coupled thiosulfate transmembrane transporter activity	19	0.00851767	-0.680672	0.680672	TD
carbon-oxygen lyase activity, acting on phosphates	101	0.00869084	0.697479	0.697479	Baseline
histidine decarboxylase activity	26	0.00907531	-0.563025	0.563025	TD
histidine metabolic process	26	0.00907531	-0.563025	0.563025	TD
ornithine-oxo-acid transaminase activity	30	0.00950148	-0.495798	0.495798	TD
potassium ion transmembrane transport	30	0.00950148	-0.495798	0.495798	TD
FMN reductase activity	30	0.00950148	-0.495798	0.495798	TD
lipopolysaccharide core region biosynthetic process	30	0.00950148	-0.495798	0.495798	TD
23S rRNA (adenine(1618)-N(6))-methyltransferase activity	30	0.00950148	-0.495798	0.495798	TD
dihydroneopterin aldolase activity	99	0.010598	0.663866	0.663866	Baseline
cysteine-type endopeptidase activity	99	0.010598	0.663866	0.663866	Baseline
mannose-1-phosphate guanylyltransferase activity	99	0.010598	0.663866	0.663866	Baseline
polygalacturonase activity	99	0.010598	0.663866	0.663866	Baseline
thiamine-phosphate diphosphorylase activity	20	0.010598	-0.663866	0.663866	TD
methionine-tRNA ligase activity	20	0.010598	-0.663866	0.663866	TD
ureidoglycolate hydrolase activity	20	0.010598	-0.663866	0.663866	TD
5-phosphoribose 1-diphosphate biosynthetic process	20	0.010598	-0.663866	0.663866	TD
pyrimidine nucleotide metabolic process	20	0.010598	-0.663866	0.663866	TD
DNA replication, synthesis of RNA primer	20	0.010598	-0.663866	0.663866	TD
UDP-glucose:hexose-1-phosphate uridylyltransferase activity	20	0.010598	-0.663866	0.663866	TD
isoprenoid biosynthetic process	99	0.010598	0.663866	0.663866	Baseline
L-fuculose-phosphate aldolase activity	20	0.010598	-0.663866	0.663866	TD
mannonate dehydratase activity	99	0.010598	0.663866	0.663866	Baseline
type II site-specific deoxyribonuclease activity	99	0.010598	0.663866	0.663866	Baseline
menaquinone biosynthetic process	99	0.010598	0.663866	0.663866	Baseline
cell outer membrane	99	0.010598	0.663866	0.663866	Baseline
citrate lyase complex	99	0.010598	0.663866	0.663866	Baseline
L,L-diaminopimelate aminotransferase activity	20	0.010598	-0.663866	0.663866	TD
cytosine transmembrane transporter activity	20	0.010598	-0.663866	0.663866	TD
glutamate synthase (NADH) activity	20	0.010598	-0.663866	0.663866	TD
benzoyl-CoA reductase activity	20	0.010598	-0.663866	0.663866	TD
siroheme biosynthetic process	20	0.010598	-0.663866	0.663866	TD
histidine catabolic process to glutamate and formate	99	0.010598	0.663866	0.663866	Baseline
outer membrane	99	0.010598	0.663866	0.663866	Baseline
plasma membrane ATP synthesis coupled proton transport	20	0.010598	-0.663866	0.663866	TD
ribosomal large subunit binding	99	0.010598	0.663866	0.663866	Baseline
ATPase-coupled carbohydrate transmembrane transporter activity	20	0.010598	-0.663866	0.663866	TD
methylmalonyl-CoA carboxytransferase activity	20	0.010598	-0.663866	0.663866	TD
unfolded protein binding	20	0.010598	-0.663866	0.663866	TD
23S rRNA (guanine(2445)-N(2))-methyltransferase activity	20	0.010598	-0.663866	0.663866	TD
cytochrome-c oxidase activity	24	0.0105984	-0.596639	0.596639	TD
tetrahydrobiopterin biosynthetic process	24	0.0105984	-0.596639	0.596639	TD
NADH dehydrogenase complex	27	0.0114018	-0.546218	0.546218	TD
DNA synthesis involved in DNA repair	31	0.0122786	-0.478992	0.478992	TD
aspartate metabolic process	31	0.0122786	-0.478992	0.478992	TD
mannose-1-phosphate guanylyltransferase (GDP) activity	31	0.0122786	-0.478992	0.478992	TD
pyrimidine ribonucleotide biosynthetic process	31	0.0122786	-0.478992	0.478992	TD
chondroitin AC lyase activity	31	0.0122786	-0.478992	0.478992	TD
viral release from host cell by cytolysis	31	0.0122786	-0.478992	0.478992	TD
chondroitin ABC lyase activity	31	0.0122786	-0.478992	0.478992	TD
heparin lyase activity	31	0.0122786	-0.478992	0.478992	TD
GDP-D-glucose phosphorylase activity	31	0.0122786	-0.478992	0.478992	TD
4-amino-4-deoxy-L-arabinose transferase activity	31	0.0122786	-0.478992	0.478992	TD
cholesterol binding	31	0.0122786	-0.478992	0.478992	TD
telomere maintenance	98	0.013077	0.647059	0.647059	Baseline
cell morphogenesis	21	0.013077	-0.647059	0.647059	TD
catalytic activity	98	0.013077	0.647059	0.647059	Baseline
GTP cyclohydrolase I activity	98	0.013077	0.647059	0.647059	Baseline
aryl sulfotransferase activity	98	0.013077	0.647059	0.647059	Baseline
diacylglycerol kinase activity	21	0.013077	-0.647059	0.647059	TD
geranyltranstransferase activity	21	0.013077	-0.647059	0.647059	TD
DNA modification	98	0.013077	0.647059	0.647059	Baseline
cellular biogenic amine metabolic process	21	0.013077	-0.647059	0.647059	TD
cadmium transmembrane transporter activity, phosphorylative mechanism	21	0.013077	-0.647059	0.647059	TD
potassium transmembrane transporter activity, phosphorylative mechanism	98	0.013077	0.647059	0.647059	Baseline
pyridoxine biosynthetic process	98	0.013077	0.647059	0.647059	Baseline
ubiquitin-like modifier activating enzyme activity	21	0.013077	-0.647059	0.647059	TD
protein biotinylation	21	0.013077	-0.647059	0.647059	TD
spore germination	21	0.013077	-0.647059	0.647059	TD
solute:proton antiporter activity	98	0.013077	0.647059	0.647059	Baseline
alanine:sodium symporter activity	21	0.013077	-0.647059	0.647059	TD
molybdate ion transport	21	0.013077	-0.647059	0.647059	TD
glutaconyl-CoA decarboxylase activity	21	0.013077	-0.647059	0.647059	TD
glycine decarboxylation via glycine cleavage system	98	0.013077	0.647059	0.647059	Baseline
protein catabolic process	21	0.013077	-0.647059	0.647059	TD
regulation of DNA-templated transcription, elongation	21	0.013077	-0.647059	0.647059	TD
4-phosphoerythronate dehydrogenase activity	98	0.013077	0.647059	0.647059	Baseline
arginine biosynthetic process via ornithine	21	0.013077	-0.647059	0.647059	TD
peptidoglycan binding	98	0.013077	0.647059	0.647059	Baseline
cellular metabolic compound salvage	21	0.013077	-0.647059	0.647059	TD
4-hydroxyphenylacetate decarboxylase activity	21	0.013077	-0.647059	0.647059	TD
DNA-7-methylguanine glycosylase activity	21	0.013077	-0.647059	0.647059	TD
sporulation	21	0.013077	-0.647059	0.647059	TD
quinone binding	98	0.013077	0.647059	0.647059	Baseline
threonine-phosphate decarboxylase activity	21	0.013077	-0.647059	0.647059	TD
DNA-7-methyladenine glycosylase activity	21	0.013077	-0.647059	0.647059	TD
DNA-3-methylguanine glycosylase activity	21	0.013077	-0.647059	0.647059	TD
nucleosome	99	0.0131723	0.663866	0.663866	Baseline
nucleosome assembly	99	0.0131723	0.663866	0.663866	Baseline
dimethylglycine N-methyltransferase activity	97	0.0134718	0.630252	0.630252	Baseline
N-acetylglucosamine catabolic process	28	0.0142432	-0.529412	0.529412	TD
response to unfolded protein	28	0.0142432	-0.529412	0.529412	TD
cellular response to unfolded protein	28	0.0142432	-0.529412	0.529412	TD
protein folding chaperone	28	0.0142432	-0.529412	0.529412	TD
choline-sulfatase activity	28	0.0142432	-0.529412	0.529412	TD
misfolded protein binding	28	0.0142432	-0.529412	0.529412	TD
lipopolysaccharide 3-alpha-galactosyltransferase activity	28	0.0142432	-0.529412	0.529412	TD
imidazolonepropionase activity	98.5	0.0142659	0.655462	0.655462	Baseline
heme transport	98	0.0153519	0.647059	0.647059	Baseline
cellular respiration	27	0.0154521	-0.546218	0.546218	TD
formate oxidation	27	0.0154521	-0.546218	0.546218	TD
hydroxymethyl-, formyl- and related transferase activity	98	0.0157132	0.647059	0.647059	Baseline
extrachromosomal circular DNA	97	0.0160241	0.630252	0.630252	Baseline
lactose metabolic process	22	0.0160241	-0.630252	0.630252	TD
nucleobase-containing compound metabolic process	22	0.0160241	-0.630252	0.630252	TD
proteolysis	97	0.0160241	0.630252	0.630252	Baseline
phospholipid biosynthetic process	22	0.0160241	-0.630252	0.630252	TD
S-adenosylmethionine-dependent methyltransferase activity	22	0.0160241	-0.630252	0.630252	TD
beta-aspartyl-peptidase activity	22	0.0160241	-0.630252	0.630252	TD
site-specific DNA-methyltransferase (adenine-specific) activity	97	0.0160241	0.630252	0.630252	Baseline
NAD biosynthetic process	22	0.0160241	-0.630252	0.630252	TD
enoyl-acyl-carrier-protein reductase activity	97	0.0160241	0.630252	0.630252	Baseline
carboxyl- or carbamoyltransferase activity	22	0.0160241	-0.630252	0.630252	TD
sirohydrochlorin cobaltochelatase activity	22	0.0160241	-0.630252	0.630252	TD
anaerobic cobalamin biosynthetic process	22	0.0160241	-0.630252	0.630252	TD
protein metabolic process	22	0.0160241	-0.630252	0.630252	TD
fructose 1,6-bisphosphate 1-phosphatase activity	22	0.0160241	-0.630252	0.630252	TD
protein transport by the Tat complex	97	0.0160241	0.630252	0.630252	Baseline
negative regulation of translational elongation	97	0.0160241	0.630252	0.630252	Baseline
2,3-bisphosphoglycerate-dependent phosphoglycerate mutase activity	97	0.0160241	0.630252	0.630252	Baseline
amylosucrase activity	22	0.0160241	-0.630252	0.630252	TD
dimethylmaleate hydratase activity	22	0.0160241	-0.630252	0.630252	TD
2,5-didehydrogluconate reductase activity	22	0.0160241	-0.630252	0.630252	TD
rRNA pseudouridine synthase activity	22	0.0160241	-0.630252	0.630252	TD
D-tagatose 6-phosphate catabolic process	22	0.0160241	-0.630252	0.630252	TD
exo-poly-alpha-galacturonosidase activity	97.5	0.0163958	0.638655	0.638655	Baseline
superoxide dismutase activity	97.5	0.0172109	0.638655	0.638655	Baseline
fructose 2,6-bisphosphate metabolic process	30.5	0.017341	-0.487395	0.487395	TD
ethanolamine ammonia-lyase activity	97	0.0173579	0.630252	0.630252	Baseline
quercetin 2,3-dioxygenase activity	29	0.0176919	-0.512605	0.512605	TD
endopeptidase Clp complex	29	0.0176919	-0.512605	0.512605	TD
fucose transmembrane transporter activity	29	0.0176919	-0.512605	0.512605	TD
protein processing	29	0.0176919	-0.512605	0.512605	TD
IMP metabolic process	29	0.0176919	-0.512605	0.512605	TD
ATPase binding	29	0.0176919	-0.512605	0.512605	TD
lipid-A-disaccharide synthase activity	97	0.0178853	0.630252	0.630252	Baseline
serine-type aminopeptidase activity	95.5	0.0192769	0.605042	0.605042	Baseline
aspartic-type endopeptidase activity	23	0.0194855	-0.613445	0.613445	TD
enoyl-acyl-carrier-protein reductase (NADH) activity	96	0.0194855	0.613445	0.613445	Baseline
exonuclease activity	96	0.0194855	0.613445	0.613445	Baseline
tryptophan synthase activity	23	0.0194855	-0.613445	0.613445	TD
cell wall	96	0.0194855	0.613445	0.613445	Baseline
glutamate biosynthetic process	23	0.0194855	-0.613445	0.613445	TD
zinc ion binding	23	0.0194855	-0.613445	0.613445	TD
protein transmembrane transporter activity	96	0.0194855	0.613445	0.613445	Baseline
mechanosensitive ion channel activity	96	0.0194855	0.613445	0.613445	Baseline
phosphopentomutase activity	23	0.0194855	-0.613445	0.613445	TD
tagatose-bisphosphate aldolase activity	23	0.0194855	-0.613445	0.613445	TD
DNA restriction-modification system	96	0.0194855	0.613445	0.613445	Baseline
3-isopropylmalate dehydratase complex	96	0.0194855	0.613445	0.613445	Baseline
ATPase-coupled monosaccharide transmembrane transporter activity	23	0.0194855	-0.613445	0.613445	TD
ATPase-coupled teichoic acid transmembrane transporter activity	23	0.0194855	-0.613445	0.613445	TD
efflux transmembrane transporter activity	96	0.0194855	0.613445	0.613445	Baseline
peptide transport	23	0.0194855	-0.613445	0.613445	TD
UDP-N-acetylgalactosamine biosynthetic process	23	0.0194855	-0.613445	0.613445	TD
sulfate reduction	23	0.0194855	-0.613445	0.613445	TD
cellulose catabolic process	23	0.0194855	-0.613445	0.613445	TD
TAT protein transport complex	96	0.0194855	0.613445	0.613445	Baseline
lysine biosynthetic process via diaminopimelate, diaminopimelate-aminotransferase pathway	23	0.0194855	-0.613445	0.613445	TD
small molecule binding	23	0.0194855	-0.613445	0.613445	TD
regulation of sporulation resulting in formation of a cellular spore	23	0.0194855	-0.613445	0.613445	TD
nicotinamide nucleotide metabolic process	23	0.0194855	-0.613445	0.613445	TD
NADP binding	23	0.0194855	-0.613445	0.613445	TD
chromosome organization	96	0.0194855	0.613445	0.613445	Baseline
N-acetyldiaminopimelate deacetylase activity	96.5	0.0201685	0.621849	0.621849	Baseline
aminomethyltransferase activity	96.5	0.0204142	0.621849	0.621849	Baseline
N-acyl-D-glutamate deacylase activity	95.5	0.0216207	0.605042	0.605042	Baseline
1,4-dihydroxy-2-naphthoyl-CoA synthase activity	96	0.0221156	0.613445	0.613445	Baseline
respiratory electron transport chain	96	0.0222026	0.613445	0.613445	Baseline
polysaccharide transport	29	0.0231921	-0.512605	0.512605	TD
acetyl-CoA carboxylase activity	24	0.0235478	-0.596639	0.596639	TD
arylsulfatase activity	95	0.0235478	0.596639	0.596639	Baseline
biotin carboxylase activity	24	0.0235478	-0.596639	0.596639	TD
carbonate dehydratase activity	95	0.0235478	0.596639	0.596639	Baseline
metallocarboxypeptidase activity	24	0.0235478	-0.596639	0.596639	TD
ferredoxin-NADP+ reductase activity	95	0.0235478	0.596639	0.596639	Baseline
5'-3' exoribonuclease activity	24	0.0235478	-0.596639	0.596639	TD
alpha-L-fucosidase activity	95	0.0235478	0.596639	0.596639	Baseline
porphobilinogen synthase activity	24	0.0235478	-0.596639	0.596639	TD
isoleucine-tRNA ligase activity	24	0.0235478	-0.596639	0.596639	TD
galactose metabolic process	24	0.0235478	-0.596639	0.596639	TD
DNA unwinding involved in DNA replication	24	0.0235478	-0.596639	0.596639	TD
DNA replication initiation	95	0.0235478	0.596639	0.596639	Baseline
regulation of translational termination	24	0.0235478	-0.596639	0.596639	TD
regulation of nitrogen utilization	24	0.0235478	-0.596639	0.596639	TD
3-hydroxybutyryl-CoA dehydrogenase activity	24	0.0235478	-0.596639	0.596639	TD
formate dehydrogenase (NAD+) activity	24	0.0235478	-0.596639	0.596639	TD
phosphatidylglycerol-prolipoprotein diacylglyceryl transferase activity	24	0.0235478	-0.596639	0.596639	TD
serine O-acetyltransferase activity	24	0.0235478	-0.596639	0.596639	TD
riboflavin biosynthetic process	95	0.0235478	0.596639	0.596639	Baseline
lipid A biosynthetic process	95	0.0235478	0.596639	0.596639	Baseline
symporter activity	24	0.0235478	-0.596639	0.596639	TD
glutamate:sodium symporter activity	24	0.0235478	-0.596639	0.596639	TD
translation release factor activity, codon specific	24	0.0235478	-0.596639	0.596639	TD
oxidoreductase activity	95	0.0235478	0.596639	0.596639	Baseline
hydrogensulfite reductase activity	24	0.0235478	-0.596639	0.596639	TD
shikimate metabolic process	24	0.0235478	-0.596639	0.596639	TD
enzyme regulator activity	24	0.0235478	-0.596639	0.596639	TD
1,5-anhydro-D-fructose reductase (1,5-anhydro-D-mannitol-forming) activity	24	0.0235478	-0.596639	0.596639	TD
cation binding	24	0.0235478	-0.596639	0.596639	TD
bacterial nucleoid	24	0.0235478	-0.596639	0.596639	TD
indolepyruvate ferredoxin oxidoreductase activity	95	0.0235478	0.596639	0.596639	Baseline
glycerol-3-phosphate cytidylyltransferase activity	24	0.0235478	-0.596639	0.596639	TD
butyrate kinase activity	95	0.0235478	0.596639	0.596639	Baseline
hyaluronan synthase activity	24	0.0235478	-0.596639	0.596639	TD
glutaminyl-tRNA synthase (glutamine-hydrolyzing) activity	24	0.0235478	-0.596639	0.596639	TD
4-hydroxythreonine-4-phosphate dehydrogenase activity	95	0.0235478	0.596639	0.596639	Baseline
chromosome separation	24	0.0235478	-0.596639	0.596639	TD
fructuronate reductase activity	95.5	0.0238493	0.605042	0.605042	Baseline
oxygen-dependent protoporphyrinogen oxidase activity	36	0.0244916	-0.394958	0.394958	TD
organic phosphonate transmembrane transporter activity	95	0.0250919	0.596639	0.596639	Baseline
cystathionine beta-synthase activity	95	0.0255751	0.596639	0.596639	Baseline
arginine catabolic process	95	0.0261916	0.596639	0.596639	Baseline
negative regulation of protein transport	32.5	0.0269375	-0.453782	0.453782	TD
ribosomal large subunit assembly	94	0.0282632	0.579832	0.579832	Baseline
double-stranded RNA binding	25	0.0282632	-0.579832	0.579832	TD
gamma-glutamylcyclotransferase activity	25	0.0282632	-0.579832	0.579832	TD
1-acylglycerol-3-phosphate O-acyltransferase activity	25	0.0282632	-0.579832	0.579832	TD
dihydroorotase activity	25	0.0282632	-0.579832	0.579832	TD
tetrahydrofolylpolyglutamate synthase activity	25	0.0282632	-0.579832	0.579832	TD
nicotinate-nucleotide diphosphorylase (carboxylating) activity	25	0.0282632	-0.579832	0.579832	TD
nicotinate phosphoribosyltransferase activity	25	0.0282632	-0.579832	0.579832	TD
glycerol-3-phosphate metabolic process	25	0.0282632	-0.579832	0.579832	TD
isoleucyl-tRNA aminoacylation	25	0.0282632	-0.579832	0.579832	TD
arginine metabolic process	25	0.0282632	-0.579832	0.579832	TD
NADP biosynthetic process	94	0.0282632	0.579832	0.579832	Baseline
cobalamin 5'-phosphate synthase activity	25	0.0282632	-0.579832	0.579832	TD
penicillin amidase activity	25	0.0282632	-0.579832	0.579832	TD
lysine biosynthetic process via diaminopimelate	25	0.0282632	-0.579832	0.579832	TD
magnesium ion transmembrane transporter activity	25	0.0282632	-0.579832	0.579832	TD
carboxy-lyase activity	94	0.0282632	0.579832	0.579832	Baseline
5,10-methylenetetrahydrofolate-dependent tRNA (m5U54) methyltransferase activity	25	0.0282632	-0.579832	0.579832	TD
nicotinamide riboside transmembrane transporter activity	94	0.0282632	0.579832	0.579832	Baseline
precorrin-2 dehydrogenase activity	25	0.0282632	-0.579832	0.579832	TD
5-dehydro-2-deoxygluconokinase activity	25	0.0282632	-0.579832	0.579832	TD
ureidoglycolate lyase activity	25	0.0282632	-0.579832	0.579832	TD
adenosylcobinamide-GDP ribazoletransferase activity	25	0.0282632	-0.579832	0.579832	TD
cyclic-guanylate-specific phosphodiesterase activity	25	0.0282632	-0.579832	0.579832	TD
pyrimidine-containing compound salvage	94	0.0288052	0.579832	0.579832	Baseline
vacuolar acidification	42.5	0.028883	-0.285714	0.285714	TD
cellular water homeostasis	42.5	0.028883	-0.285714	0.285714	TD
vacuolar proton-transporting V-type ATPase complex	42.5	0.028883	-0.285714	0.285714	TD
racemase and epimerase activity	42.5	0.028883	-0.285714	0.285714	TD
RNA (guanine-N7)-methylation	42.5	0.028883	-0.285714	0.285714	TD
ribosomal small subunit binding	42.5	0.028883	-0.285714	0.285714	TD
D-threonine aldolase activity	42.5	0.028883	-0.285714	0.285714	TD
cysteate synthase activity	42.5	0.028883	-0.285714	0.285714	TD
negative regulation of fatty acid biosynthetic process	42.5	0.028883	-0.285714	0.285714	TD
mRNA pseudouridine synthesis	42.5	0.028883	-0.285714	0.285714	TD
response to superoxide	42.5	0.028883	-0.285714	0.285714	TD
enzyme-directed rRNA pseudouridine synthesis	42.5	0.028883	-0.285714	0.285714	TD
regulation of cell growth	42.5	0.028883	-0.285714	0.285714	TD
3-hydroxyisobutyryl-CoA hydrolase activity	42.5	0.028883	-0.285714	0.285714	TD
3',5'-cyclic-AMP phosphodiesterase activity	42.5	0.028883	-0.285714	0.285714	TD
protein-L-isoaspartate (D-aspartate) O-methyltransferase activity	42.5	0.028883	-0.285714	0.285714	TD
calcium channel activity	42.5	0.028883	-0.285714	0.285714	TD
lactose catabolic process	42.5	0.028883	-0.285714	0.285714	TD
fructose metabolic process	42.5	0.028883	-0.285714	0.285714	TD
mitochondrial electron transport, NADH to ubiquinone	42.5	0.028883	-0.285714	0.285714	TD
protein acetylation	42.5	0.028883	-0.285714	0.285714	TD
fatty acid beta-oxidation	42.5	0.028883	-0.285714	0.285714	TD
cellular calcium ion homeostasis	42.5	0.028883	-0.285714	0.285714	TD
calcium, potassium:sodium antiporter activity	42.5	0.028883	-0.285714	0.285714	TD
O-acyltransferase activity	42.5	0.028883	-0.285714	0.285714	TD
2-oxopent-4-enoate hydratase activity	42.5	0.028883	-0.285714	0.285714	TD
UDP-2,3-diacylglucosamine hydrolase activity	42.5	0.028883	-0.285714	0.285714	TD
enterochelin esterase activity	42.5	0.028883	-0.285714	0.285714	TD
oligosaccharide catabolic process	42.5	0.028883	-0.285714	0.285714	TD
response to radiation	42.5	0.028883	-0.285714	0.285714	TD
exodeoxyribonuclease V complex	42.5	0.028883	-0.285714	0.285714	TD
carnitine metabolic process	42.5	0.028883	-0.285714	0.285714	TD
RNA modification	42.5	0.028883	-0.285714	0.285714	TD
histidine phosphotransfer kinase activity	42.5	0.028883	-0.285714	0.285714	TD
disulfide oxidoreductase activity	42.5	0.028883	-0.285714	0.285714	TD
oxidoreductase activity, acting on diphenols and related substances as donors, oxygen as acceptor	42.5	0.028883	-0.285714	0.285714	TD
thiamine kinase activity	42.5	0.028883	-0.285714	0.285714	TD
methylglyoxal catabolic process to D-lactate via S-lactoyl-glutathione	42.5	0.028883	-0.285714	0.285714	TD
arabinose catabolic process	42.5	0.028883	-0.285714	0.285714	TD
signal transduction by protein phosphorylation	42.5	0.028883	-0.285714	0.285714	TD
pyridoxal phosphatase activity	42.5	0.028883	-0.285714	0.285714	TD
hydroxyisourate hydrolase activity	42.5	0.028883	-0.285714	0.285714	TD
cellular response to amino acid starvation	42.5	0.028883	-0.285714	0.285714	TD
short-chain carboxylesterase activity	42.5	0.028883	-0.285714	0.285714	TD
Kdo2-lipid A biosynthetic process	42.5	0.028883	-0.285714	0.285714	TD
peptide binding	42.5	0.028883	-0.285714	0.285714	TD
hydrogen peroxide metabolic process	42.5	0.028883	-0.285714	0.285714	TD
D-glucarate catabolic process	42.5	0.028883	-0.285714	0.285714	TD
2-hydroxymethylglutarate dehydrogenase activity	42.5	0.028883	-0.285714	0.285714	TD
5-amino-6-(5-phosphoribitylamino)uracil phosphatase activity	42.5	0.028883	-0.285714	0.285714	TD
glycerate 2-kinase activity	42.5	0.028883	-0.285714	0.285714	TD
regulation of chemotaxis	42.5	0.028883	-0.285714	0.285714	TD
regulation of RNA metabolic process	42.5	0.028883	-0.285714	0.285714	TD
calcium ion transmembrane transport	42.5	0.028883	-0.285714	0.285714	TD
dipeptide transmembrane transporter activity	42.5	0.028883	-0.285714	0.285714	TD
phosphatidylglycerol-phosphatidylethanolamine phosphatidyltransferase activity	42.5	0.028883	-0.285714	0.285714	TD
intermembrane phospholipid transfer	42.5	0.028883	-0.285714	0.285714	TD
starch catabolic process	42.5	0.028883	-0.285714	0.285714	TD
mRNA polyadenylation	42.5	0.028883	-0.285714	0.285714	TD
phosphorus metabolic process	42.5	0.028883	-0.285714	0.285714	TD
glycoside catabolic process	42.5	0.028883	-0.285714	0.285714	TD
ATPase-coupled lipid transmembrane transporter activity	42.5	0.028883	-0.285714	0.285714	TD
'de novo' NAD biosynthetic process from aspartate	42.5	0.028883	-0.285714	0.285714	TD
maintenance of stationary phase	42.5	0.028883	-0.285714	0.285714	TD
conversion of methionyl-tRNA to N-formyl-methionyl-tRNA	42.5	0.028883	-0.285714	0.285714	TD
thiol-dependent ubiquitin-specific protease activity	42.5	0.028883	-0.285714	0.285714	TD
protein deubiquitination	42.5	0.028883	-0.285714	0.285714	TD
bis(5'-nucleosyl)-tetraphosphatase (asymmetrical) activity	42.5	0.028883	-0.285714	0.285714	TD
formate dehydrogenase (cytochrome-c-553) activity	42.5	0.028883	-0.285714	0.285714	TD
symbiotic process benefiting host	42.5	0.028883	-0.285714	0.285714	TD
xyloglucan catabolic process	42.5	0.028883	-0.285714	0.285714	TD
purine-specific mismatch base pair DNA N-glycosylase activity	42.5	0.028883	-0.285714	0.285714	TD
ribonuclease E activity	42.5	0.028883	-0.285714	0.285714	TD
oxidized purine DNA binding	42.5	0.028883	-0.285714	0.285714	TD
8-oxo-7,8-dihydroguanine DNA N-glycosylase activity	42.5	0.028883	-0.285714	0.285714	TD
adenine/guanine mispair binding	42.5	0.028883	-0.285714	0.285714	TD
aryl-alcohol dehydrogenase (NADP+) activity	42.5	0.028883	-0.285714	0.285714	TD
ribonucleoprotein complex	42.5	0.028883	-0.285714	0.285714	TD
nucleolus	42.5	0.028883	-0.285714	0.285714	TD
transposition, RNA-mediated	42.5	0.028883	-0.285714	0.285714	TD
reverse transcription involved in RNA-mediated transposition	42.5	0.028883	-0.285714	0.285714	TD
nucleic acid phosphodiester bond hydrolysis	42.5	0.028883	-0.285714	0.285714	TD
microtubule cytoskeleton	93.5	0.0301922	0.571429	0.571429	Baseline
haloacetate dehalogenase activity	93.5	0.0301922	0.571429	0.571429	Baseline
3-methyl-2-oxobutanoate dehydrogenase (ferredoxin) activity	28.5	0.030558	-0.521008	0.521008	TD
inosine kinase activity	37	0.0314342	-0.378151	0.378151	TD
L-fucose mutarotase activity	37	0.0314342	-0.378151	0.378151	TD
2-phosphosulfolactate phosphatase activity	37	0.0314342	-0.378151	0.378151	TD
methyl indole-3-acetate esterase activity	37	0.0314342	-0.378151	0.378151	TD
bile acid catabolic process	37	0.0314342	-0.378151	0.378151	TD
sulfur carrier activity	37	0.0314342	-0.378151	0.378151	TD
mucus layer	91	0.0318768	0.529412	0.529412	Baseline
putrescine biosynthetic process from arginine via N-carbamoylputrescine	26	0.0327441	-0.563025	0.563025	TD
putrescine carbamoyltransferase activity	26	0.0327441	-0.563025	0.563025	TD
oligopeptide transport	93.5	0.0329863	0.571429	0.571429	Baseline
cellular response to phosphate starvation	33.5	0.0332597	-0.436975	0.436975	TD
phosphopyruvate hydratase complex	26	0.033724	-0.563025	0.563025	TD
polysaccharide catabolic process	26	0.033724	-0.563025	0.563025	TD
magnesium ion binding	26	0.033724	-0.563025	0.563025	TD
aminoacyl-tRNA hydrolase activity	26	0.033724	-0.563025	0.563025	TD
asparaginase activity	93	0.033724	0.563025	0.563025	Baseline
ribonuclease III activity	26	0.033724	-0.563025	0.563025	TD
oligo-1,6-glucosidase activity	26	0.033724	-0.563025	0.563025	TD
monovalent cation:proton antiporter activity	93	0.033724	0.563025	0.563025	Baseline
DNA-dependent DNA replication	26	0.033724	-0.563025	0.563025	TD
N-methyltransferase activity	93	0.033724	0.563025	0.563025	Baseline
beta-glucosidase activity	26	0.033724	-0.563025	0.563025	TD
5-amino-6-(5-phosphoribosylamino)uracil reductase activity	93	0.033724	0.563025	0.563025	Baseline
UDP-N-acetylglucosamine 1-carboxyvinyltransferase activity	26	0.033724	-0.563025	0.563025	TD
citrate CoA-transferase activity	93	0.033724	0.563025	0.563025	Baseline
glutamate racemase activity	26	0.033724	-0.563025	0.563025	TD
deoxyribonucleotide biosynthetic process	93	0.033724	0.563025	0.563025	Baseline
DNA mediated transformation	26	0.033724	-0.563025	0.563025	TD
protein secretion	93	0.033724	0.563025	0.563025	Baseline
phenylacetate catabolic process	93	0.033724	0.563025	0.563025	Baseline
ATPase-coupled phosphate ion transmembrane transporter activity	26	0.033724	-0.563025	0.563025	TD
ATPase-coupled iron-chelate transporter activity	93	0.033724	0.563025	0.563025	Baseline
L-glutamate transmembrane transport	26	0.033724	-0.563025	0.563025	TD
integral component of membrane	93	0.033724	0.563025	0.563025	Baseline
nickel cation binding	26	0.033724	-0.563025	0.563025	TD
phosphatase activity	93	0.033724	0.563025	0.563025	Baseline
isomerase activity	93	0.033724	0.563025	0.563025	Baseline
ATPase activity	26	0.033724	-0.563025	0.563025	TD
NAD metabolic process	93	0.033724	0.563025	0.563025	Baseline
aldehyde dehydrogenase (FAD-independent) activity	26	0.033724	-0.563025	0.563025	TD
alpha-ribazole phosphatase activity	26	0.033724	-0.563025	0.563025	TD
tRNA-specific adenosine deaminase activity	93	0.0338508	0.563025	0.563025	Baseline
ATPase-coupled arsenite transmembrane transporter activity	93	0.0338508	0.563025	0.563025	Baseline
translational elongation	31	0.0340985	-0.478992	0.478992	TD
precorrin-3B C17-methyltransferase activity	93	0.0346877	0.563025	0.563025	Baseline
ferredoxin-NAD+ reductase activity	93	0.0346877	0.563025	0.563025	Baseline
sn-glycerol-3-phosphate:ubiquinone-8 oxidoreductase activity	93	0.035289	0.563025	0.563025	Baseline
starch binding	93	0.035289	0.563025	0.563025	Baseline
L-rhamnonate dehydratase activity	92	0.0368402	0.546218	0.546218	Baseline
phospholipid metabolic process	92.5	0.0375269	0.554622	0.554622	Baseline
spermidine transmembrane transporter activity	33	0.0398079	-0.445378	0.445378	TD
3-deoxy-7-phosphoheptulonate synthase activity	27	0.0399938	-0.546218	0.546218	TD
DNA (cytosine-5-)-methyltransferase activity	27	0.0399938	-0.546218	0.546218	TD
NAD+ kinase activity	92	0.0399938	0.546218	0.546218	Baseline
RNA-directed DNA polymerase activity	92	0.0399938	0.546218	0.546218	Baseline
biotin-acetyl-CoA-carboxylase ligase activity	27	0.0399938	-0.546218	0.546218	TD
phosphopyruvate hydratase activity	27	0.0399938	-0.546218	0.546218	TD
protein serine/threonine/tyrosine kinase activity	27	0.0399938	-0.546218	0.546218	TD
thymidine kinase activity	92	0.0399938	0.546218	0.546218	Baseline
lysine-tRNA ligase activity	92	0.0399938	0.546218	0.546218	Baseline
integral component of plasma membrane	92	0.0399938	0.546218	0.546218	Baseline
DNA-templated transcription, initiation	92	0.0399938	0.546218	0.546218	Baseline
rRNA processing	27	0.0399938	-0.546218	0.546218	TD
one-carbon metabolic process	92	0.0399938	0.546218	0.546218	Baseline
cell cycle	27	0.0399938	-0.546218	0.546218	TD
NADH dehydrogenase (ubiquinone) activity	92	0.0399938	0.546218	0.546218	Baseline
4-hydroxy-2-oxoglutarate aldolase activity	92	0.0399938	0.546218	0.546218	Baseline
exodeoxyribonuclease V activity	92	0.0399938	0.546218	0.546218	Baseline
type I site-specific deoxyribonuclease activity	92	0.0399938	0.546218	0.546218	Baseline
cellular response to starvation	27	0.0399938	-0.546218	0.546218	TD
excinuclease repair complex	27	0.0399938	-0.546218	0.546218	TD
phosphoenolpyruvate-dependent sugar phosphotransferase system	27	0.0399938	-0.546218	0.546218	TD
DNA integration	92	0.0399938	0.546218	0.546218	Baseline
oxidoreductase activity, acting on the CH-CH group of donors	92	0.0399938	0.546218	0.546218	Baseline
sigma factor activity	92	0.0399938	0.546218	0.546218	Baseline
metal ion transport	27	0.0399938	-0.546218	0.546218	TD
CO-methylating acetyl-CoA synthase activity	27	0.0399938	-0.546218	0.546218	TD
tetrahydrofolate biosynthetic process	92	0.0399938	0.546218	0.546218	Baseline
methylenetetrahydrofolate-tRNA-(uracil-5-)-methyltransferase (FADH2-oxidizing) activity	27	0.0399938	-0.546218	0.546218	TD
CDP-glycerol glycerophosphotransferase activity	27	0.0399938	-0.546218	0.546218	TD
peroxiredoxin activity	92	0.0399938	0.546218	0.546218	Baseline
linear malto-oligosaccharide phosphorylase activity	27	0.0399938	-0.546218	0.546218	TD
SHG alpha-glucan phosphorylase activity	27	0.0399938	-0.546218	0.546218	TD
malonyl-CoA biosynthetic process	27	0.0399938	-0.546218	0.546218	TD
heparin-sulfate lyase activity	38	0.0400013	-0.361345	0.361345	TD
chondroitin-sulfate-ABC endolyase activity	38	0.0400013	-0.361345	0.361345	TD
acetylxylan esterase activity	38	0.0400013	-0.361345	0.361345	TD
maltose phosphorylase activity	38	0.0400013	-0.361345	0.361345	TD
1-alkyl-2-acetylglycerophosphocholine esterase activity	38	0.0400013	-0.361345	0.361345	TD
aromatic compound catabolic process	38	0.0400013	-0.361345	0.361345	TD
bacteriocin transport	38	0.0400013	-0.361345	0.361345	TD
base-excision repair, AP site formation via deaminated base removal	38	0.0400013	-0.361345	0.361345	TD
neuropeptide signaling pathway	34.5	0.0408109	-0.420168	0.420168	TD
positive regulation of translational fidelity	34.5	0.0408109	-0.420168	0.420168	TD
cellulose biosynthetic process	34.5	0.0408109	-0.420168	0.420168	TD
electron transport coupled proton transport	32	0.0410296	-0.462185	0.462185	TD
nicotinamidase activity	92	0.0420742	0.546218	0.546218	Baseline
phenylpyruvate tautomerase activity	91.5	0.0438014	0.537815	0.537815	Baseline
protein ADP-ribosylation	28	0.0448775	-0.529412	0.529412	TD
acetate-CoA ligase (ADP-forming) activity	91	0.0462343	0.529412	0.529412	Baseline
phosphorelay signal transduction system	28	0.0471708	-0.529412	0.529412	TD
NADH dehydrogenase activity	91	0.0471708	0.529412	0.529412	Baseline
NAD(P)+-protein-arginine ADP-ribosyltransferase activity	91	0.0471708	0.529412	0.529412	Baseline
acyl-CoA dehydrogenase activity	91	0.0471708	0.529412	0.529412	Baseline
glutamate N-acetyltransferase activity	28	0.0471708	-0.529412	0.529412	TD
hydrolase activity, hydrolyzing O-glycosyl compounds	91	0.0471708	0.529412	0.529412	Baseline
sulfate adenylyltransferase (ATP) activity	28	0.0471708	-0.529412	0.529412	TD
valine-tRNA ligase activity	28	0.0471708	-0.529412	0.529412	TD
xylulokinase activity	28	0.0471708	-0.529412	0.529412	TD
cytosol	91	0.0471708	0.529412	0.529412	Baseline
GDP-mannose 4,6-dehydratase activity	91	0.0471708	0.529412	0.529412	Baseline
2-dehydro-3-deoxy-phosphogluconate aldolase activity	91	0.0471708	0.529412	0.529412	Baseline
L-rhamnose isomerase activity	91	0.0471708	0.529412	0.529412	Baseline
acetate kinase activity	28	0.0471708	-0.529412	0.529412	TD
alanine racemase activity	28	0.0471708	-0.529412	0.529412	TD
4-hydroxy-tetrahydrodipicolinate synthase activity	28	0.0471708	-0.529412	0.529412	TD
glycine C-acetyltransferase activity	91	0.0471708	0.529412	0.529412	Baseline
peptidoglycan glycosyltransferase activity	91	0.0471708	0.529412	0.529412	Baseline
phosphoglucosamine mutase activity	28	0.0471708	-0.529412	0.529412	TD
isoleucine biosynthetic process	28	0.0471708	-0.529412	0.529412	TD
molybdate ion transmembrane transporter activity	28	0.0471708	-0.529412	0.529412	TD
thiamine transmembrane transporter activity	28	0.0471708	-0.529412	0.529412	TD
lyase activity	91	0.0471708	0.529412	0.529412	Baseline
precorrin-8X methylmutase activity	28	0.0471708	-0.529412	0.529412	TD
glycine biosynthetic process from serine	91	0.0471708	0.529412	0.529412	Baseline
GDP-mannose metabolic process	91	0.0471708	0.529412	0.529412	Baseline
D-alanine biosynthetic process	28	0.0471708	-0.529412	0.529412	TD
riboflavin transmembrane transporter activity	28	0.0471708	-0.529412	0.529412	TD
2-iminoacetate synthase activity	28	0.0471708	-0.529412	0.529412	TD
pyridoxal 5'-phosphate synthase (glutamine hydrolysing) activity	28	0.0471708	-0.529412	0.529412	TD
2-keto-3-deoxygluconate aldolase activity	91	0.0471708	0.529412	0.529412	Baseline
phosphatidylinositol phosphorylation	91	0.0471708	0.529412	0.529412	Baseline
mannosylfructose-phosphate synthase activity	28	0.0471708	-0.529412	0.529412	TD
methione N-acyltransferase activity	28	0.0471708	-0.529412	0.529412	TD
primosome complex	28	0.0471708	-0.529412	0.529412	TD
CMP-keto-3-deoxy-D-manno-octulosonic acid biosynthetic process	91	0.0472574	0.529412	0.529412	Baseline
cytosolic small ribosomal subunit	91	0.0484811	0.529412	0.529412	Baseline
glycerol-3-phosphate dehydrogenase (quinone) activity	33	0.0491193	-0.445378	0.445378	TD
alpha-glucuronidase activity	33	0.0491193	-0.445378	0.445378	TD
tRNA guanine ribose methylation	35.5	0.0497673	-0.403361	0.403361	TD
alpha-N-acetylglucosaminidase activity	35.5	0.0497673	-0.403361	0.403361	TD
response to hydrogen peroxide	35.5	0.0497673	-0.403361	0.403361	TD
adenine binding	39	0.0504724	-0.344538	0.344538	TD
calcium ion transport	39	0.0504724	-0.344538	0.344538	TD
acyl-carrier-protein phosphodiesterase activity	39	0.0504724	-0.344538	0.344538	TD
nucleobase-containing compound kinase activity	39	0.0504724	-0.344538	0.344538	TD
dUTP catabolic process	39	0.0504724	-0.344538	0.344538	TD
glucose 6-phosphate metabolic process	39	0.0504724	-0.344538	0.344538	TD
thiazole biosynthetic process	39	0.0504724	-0.344538	0.344538	TD
tRNA wobble position uridine thiolation	39	0.0504724	-0.344538	0.344538	TD
3',5'-cyclic-nucleotide phosphodiesterase activity	39	0.0504724	-0.344538	0.344538	TD
phosphatidylglycerol biosynthetic process	39	0.0504724	-0.344538	0.344538	TD
phospholipid catabolic process	39	0.0504724	-0.344538	0.344538	TD
posttranscriptional regulation of gene expression	39	0.0504724	-0.344538	0.344538	TD
RNA strand annealing activity	39	0.0504724	-0.344538	0.344538	TD
RNA strand-exchange activity	39	0.0504724	-0.344538	0.344538	TD
protein stabilization	39	0.0504724	-0.344538	0.344538	TD
chaperone-mediated protein complex assembly	39	0.0504724	-0.344538	0.344538	TD
negative regulation of cell division	39	0.0504724	-0.344538	0.344538	TD
glucan endo-1,4-beta-glucanase activity, C-3 substituted reducing group	39	0.0504724	-0.344538	0.344538	TD
detoxification of arsenic-containing substance	39	0.0504724	-0.344538	0.344538	TD
CAAX-box protein processing	39	0.0504724	-0.344538	0.344538	TD
oxidoreductase activity, acting on NAD(P)H, NAD(P) as acceptor	39	0.0504724	-0.344538	0.344538	TD
glucan 1,6-alpha-glucosidase activity	89.5	0.0518211	0.504202	0.504202	Baseline
cytoplasmic side of plasma membrane	90.5	0.0522216	0.521008	0.521008	Baseline
glutathione transmembrane transport	30	0.0527738	-0.495798	0.495798	TD
methanogenesis, from carbon dioxide	83	0.0548307	0.394958	0.394958	Baseline
2-isopropylmalate synthase activity	90	0.0553186	0.512605	0.512605	Baseline
3-phosphoshikimate 1-carboxyvinyltransferase activity	29	0.0553186	-0.512605	0.512605	TD
CDP-diacylglycerol-serine O-phosphatidyltransferase activity	90	0.0553186	0.512605	0.512605	Baseline
cystathionine gamma-lyase activity	29	0.0553186	-0.512605	0.512605	TD
4-alpha-glucanotransferase activity	29	0.0553186	-0.512605	0.512605	TD
3-oxoacyl-acyl-carrier-protein synthase activity	90	0.0553186	0.512605	0.512605	Baseline
galactokinase activity	29	0.0553186	-0.512605	0.512605	TD
hydroxymethylbilane synthase activity	29	0.0553186	-0.512605	0.512605	TD
methylenetetrahydrofolate dehydrogenase (NADP+) activity	90	0.0553186	0.512605	0.512605	Baseline
selenide, water dikinase activity	29	0.0553186	-0.512605	0.512605	TD
DNA topological change	29	0.0553186	-0.512605	0.512605	TD
DNA-templated transcription, elongation	29	0.0553186	-0.512605	0.512605	TD
methionyl-tRNA aminoacylation	29	0.0553186	-0.512605	0.512605	TD
transcription factor binding	90	0.0553186	0.512605	0.512605	Baseline
tRNA (guanine-N7-)-methyltransferase activity	29	0.0553186	-0.512605	0.512605	TD
protein methyltransferase activity	29	0.0553186	-0.512605	0.512605	TD
sulfuric ester hydrolase activity	90	0.0553186	0.512605	0.512605	Baseline
cyclopropane-fatty-acyl-phospholipid synthase activity	29	0.0553186	-0.512605	0.512605	TD
protein-N(PI)-phosphohistidine-sugar phosphotransferase activity	29	0.0553186	-0.512605	0.512605	TD
response to heat	29	0.0553186	-0.512605	0.512605	TD
pyridoxal 5'-phosphate salvage	29	0.0553186	-0.512605	0.512605	TD
thiamine transport	29	0.0553186	-0.512605	0.512605	TD
antioxidant activity	90	0.0553186	0.512605	0.512605	Baseline
ATPase-coupled cation transmembrane transporter activity	29	0.0553186	-0.512605	0.512605	TD
peptide-methionine (R)-S-oxide reductase activity	90	0.0553186	0.512605	0.512605	Baseline
peptide deformylase activity	29	0.0553186	-0.512605	0.512605	TD
protein transport by the Sec complex	29	0.0553186	-0.512605	0.512605	TD
L-cystine L-cysteine-lyase (deaminating)	29	0.0553186	-0.512605	0.512605	TD
alpha-L-arabinofuranosidase activity	90	0.0553186	0.512605	0.512605	Baseline
response to antibiotic	29	0.0553186	-0.512605	0.512605	TD
16S rRNA (adenine(1518)-N(6)/adenine(1519)-N(6))-dimethyltransferase activity	29	0.0553186	-0.512605	0.512605	TD
L-threonylcarbamoyladenylate synthase	29	0.0553186	-0.512605	0.512605	TD
cell wall organization	29	0.0553186	-0.512605	0.512605	TD
FAD binding	29	0.0553186	-0.512605	0.512605	TD
bacterial-type flagellum filament	29	0.0562005	-0.512605	0.512605	TD
N-acyl-D-amino-acid deacylase activity	89.5	0.0562948	0.504202	0.504202	Baseline
butyrate metabolic process	90	0.0566844	0.512605	0.512605	Baseline
2-deoxy-D-gluconate 3-dehydrogenase activity	31	0.0573839	-0.478992	0.478992	TD
L-fuconate dehydratase activity	84	0.0577484	0.411765	0.411765	Baseline
maturation of LSU-rRNA	34	0.058507	-0.428571	0.428571	TD
uroporphyrinogen III biosynthetic process	34	0.058507	-0.428571	0.428571	TD
carboxyl-O-methyltransferase activity	34	0.058507	-0.428571	0.428571	TD
cellobiose phosphorylase activity	89	0.0585144	0.495798	0.495798	Baseline
acyl-acyl-carrier-protein-UDP-N-acetylglucosamine O-acyltransferase activity	89.5	0.0590277	0.504202	0.504202	Baseline
tRNA N1-guanine methylation	36.5	0.0603167	-0.386555	0.386555	TD
dimethylallyltranstransferase activity	36.5	0.0603167	-0.386555	0.386555	TD
mitochondrial inner membrane	36.5	0.0603167	-0.386555	0.386555	TD
glycosaminoglycan catabolic process	36.5	0.0603167	-0.386555	0.386555	TD
glycine metabolic process	36.5	0.0603167	-0.386555	0.386555	TD
L-serine catabolic process	36.5	0.0603167	-0.386555	0.386555	TD
tRNA (guanine-N1-)-methyltransferase activity	36.5	0.0603167	-0.386555	0.386555	TD
tryptophanase activity	36.5	0.0603167	-0.386555	0.386555	TD
phospholipid transport	36.5	0.0603167	-0.386555	0.386555	TD
lactate fermentation to propionate and acetate	36.5	0.0603167	-0.386555	0.386555	TD
tetrahydrofolate metabolic process	36.5	0.0603167	-0.386555	0.386555	TD
folic acid metabolic process	36.5	0.0603167	-0.386555	0.386555	TD
D-threo-aldose 1-dehydrogenase activity	36.5	0.0603167	-0.386555	0.386555	TD
serine binding	36.5	0.0603167	-0.386555	0.386555	TD
fructose 6-phosphate aldolase activity	36.5	0.0603167	-0.386555	0.386555	TD
protein-3-O-(N-acetyl-D-glucosaminyl)-L-threonine O-N-acetyl-alpha-D-glucosaminase activity	36.5	0.0603167	-0.386555	0.386555	TD
protein-3-O-(N-acetyl-D-glucosaminyl)-L-serine O-N-acetyl-alpha-D-glucosaminase activity	36.5	0.0603167	-0.386555	0.386555	TD
protein-3-O-(N-acetyl-D-glucosaminyl)-L-serine/L-threonine O-N-acetyl-alpha-D-glucosaminase activity	36.5	0.0603167	-0.386555	0.386555	TD
cellular response to tetrahydrofolate	36.5	0.0603167	-0.386555	0.386555	TD
response to organic substance	36.5	0.0603167	-0.386555	0.386555	TD
lipopolysaccharide glucosyltransferase I activity	36.5	0.0603167	-0.386555	0.386555	TD
2,6-beta-fructan 6-levanbiohydrolase activity	89.5	0.0604287	0.504202	0.504202	Baseline
isopentenyl diphosphate biosynthetic process, mevalonate pathway	87.5	0.0619798	0.470588	0.470588	Baseline
D-alanine D-alanyl carrier protein ligase activity	87.5	0.0619798	0.470588	0.470588	Baseline
ADP-L-glycero-beta-D-manno-heptose biosynthetic process	31.5	0.0619798	-0.470588	0.470588	TD
NADPH:quinone reductase activity	89	0.0622303	0.495798	0.495798	Baseline
anaerobic electron transport chain	89	0.0634554	0.495798	0.495798	Baseline
pseudouridine synthesis	30	0.0645471	-0.495798	0.495798	TD
aconitate hydratase activity	89	0.0645471	0.495798	0.495798	Baseline
adenylylsulfate kinase activity	89	0.0645471	0.495798	0.495798	Baseline
glyceraldehyde-3-phosphate dehydrogenase (NAD+) (phosphorylating) activity	30	0.0645471	-0.495798	0.495798	TD
monooxygenase activity	89	0.0645471	0.495798	0.495798	Baseline
beta-galactosidase activity	89	0.0645471	0.495798	0.495798	Baseline
spermidine synthase activity	30	0.0645471	-0.495798	0.495798	TD
inorganic phosphate transmembrane transporter activity	30	0.0645471	-0.495798	0.495798	TD
cellular aldehyde metabolic process	30	0.0645471	-0.495798	0.495798	TD
valyl-tRNA aminoacylation	30	0.0645471	-0.495798	0.495798	TD
polyamine biosynthetic process	30	0.0645471	-0.495798	0.495798	TD
lipid binding	30	0.0645471	-0.495798	0.495798	TD
6-phospho-beta-glucosidase activity	30	0.0645471	-0.495798	0.495798	TD
glycerol dehydrogenase NAD+ activity	30	0.0645471	-0.495798	0.495798	TD
cobalamin biosynthetic process	30	0.0645471	-0.495798	0.495798	TD
sodium ion transmembrane transporter activity	89	0.0645471	0.495798	0.495798	Baseline
ATPase-coupled ferric iron transmembrane transporter activity	30	0.0645471	-0.495798	0.495798	TD
5'-flap endonuclease activity	89	0.0645471	0.495798	0.495798	Baseline
enzyme active site formation	30	0.0645471	-0.495798	0.495798	TD
hexose metabolic process	89	0.0645471	0.495798	0.495798	Baseline
S-adenosylhomocysteine catabolic process	89	0.0645471	0.495798	0.495798	Baseline
urea metabolic process	30	0.0645471	-0.495798	0.495798	TD
neopullulanase activity	30	0.0645471	-0.495798	0.495798	TD
NAD-dependent protein deacetylase activity	30	0.0645471	-0.495798	0.495798	TD
ATP synthesis coupled electron transport	89	0.0645471	0.495798	0.495798	Baseline
2Fe-2S cluster assembly	30	0.0645471	-0.495798	0.495798	TD
1,4-dihydroxy-2-naphthoate octaprenyltransferase activity	89	0.0645471	0.495798	0.495798	Baseline
1,3-propanediol dehydrogenase activity	30	0.0645471	-0.495798	0.495798	TD
magnesium-protoporphyrin IX monomethyl ester (oxidative) cyclase activity	30	0.0645471	-0.495798	0.495798	TD
hydroxylamine reductase activity	30	0.0645471	-0.495798	0.495798	TD
diguanylate cyclase activity	30	0.0645471	-0.495798	0.495798	TD
16S rRNA (guanine(966)-N(2))-methyltransferase activity	30	0.0645471	-0.495798	0.495798	TD
intracellular protein transmembrane transport	30	0.0645471	-0.495798	0.495798	TD
protein-containing complex assembly	30	0.0645471	-0.495798	0.495798	TD
methyl beta-D-glucoside 6-phosphate glucohydrolase activity	30	0.0645471	-0.495798	0.495798	TD
dihydropyrimidinase activity	89	0.0652684	0.495798	0.495798	Baseline
phosphatidate phosphatase activity	89	0.0652684	0.495798	0.495798	Baseline
cytosolic large ribosomal subunit	89	0.0652684	0.495798	0.495798	Baseline
hexulose-6-phosphate isomerase activity	89	0.0654442	0.495798	0.495798	Baseline
unsaturated rhamnogalacturonyl hydrolase activity	34	0.067929	-0.428571	0.428571	TD
regulation of apoptotic process	88.5	0.068154	0.487395	0.487395	Baseline
malate dehydrogenase activity	35	0.069339	-0.411765	0.411765	TD
glutamate formimidoyltransferase activity	35	0.069339	-0.411765	0.411765	TD
D-glucuronate catabolic process	35	0.069339	-0.411765	0.411765	TD
N-acetylornithine carbamoyltransferase activity	35	0.069339	-0.411765	0.411765	TD
Gram-negative-bacterium-type cell outer membrane assembly	88	0.0718049	0.478992	0.478992	Baseline
nucleobase catabolic process	86.5	0.0720868	0.453782	0.453782	Baseline
exosome (RNase complex)	80	0.07368	0.344538	0.344538	Baseline
proline racemase activity	88	0.07472	0.478992	0.478992	Baseline
rRNA (adenine-N6,N6-)-dimethyltransferase activity	88	0.0749197	0.478992	0.478992	Baseline
DNA primase activity	31	0.0749197	-0.478992	0.478992	TD
DNA ligase (NAD+) activity	31	0.0749197	-0.478992	0.478992	TD
acylphosphatase activity	31	0.0749197	-0.478992	0.478992	TD
deoxyribonuclease activity	31	0.0749197	-0.478992	0.478992	TD
phosphoribosylaminoimidazole carboxylase activity	88	0.0749197	0.478992	0.478992	Baseline
protein tyrosine phosphatase activity	31	0.0749197	-0.478992	0.478992	TD
proline-tRNA ligase activity	31	0.0749197	-0.478992	0.478992	TD
voltage-gated chloride channel activity	31	0.0749197	-0.478992	0.478992	TD
glucuronate catabolic process	88	0.0749197	0.478992	0.478992	Baseline
pyridoxal kinase activity	31	0.0749197	-0.478992	0.478992	TD
holo-acyl-carrier-protein synthase activity	31	0.0749197	-0.478992	0.478992	TD
urease activity	31	0.0749197	-0.478992	0.478992	TD
ferrous iron transmembrane transporter activity	31	0.0749197	-0.478992	0.478992	TD
ATPase-coupled glycerol-3-phosphate transmembrane transporter activity	31	0.0749197	-0.478992	0.478992	TD
galactose transmembrane transport	31	0.0749197	-0.478992	0.478992	TD
pyrophosphatase activity	88	0.0749197	0.478992	0.478992	Baseline
oxidoreductase activity, acting on CH or CH2 groups, NAD or NADP as acceptor	31	0.0749197	-0.478992	0.478992	TD
protein repair	88	0.0749197	0.478992	0.478992	Baseline
fructose 1,6-bisphosphate metabolic process	31	0.0749197	-0.478992	0.478992	TD
cell division site	88	0.0749197	0.478992	0.478992	Baseline
5-(carboxyamino)imidazole ribonucleotide synthase activity	88	0.0749197	0.478992	0.478992	Baseline
phosphate ion transmembrane transport	31	0.0749197	-0.478992	0.478992	TD
purine-containing compound salvage	31	0.0749197	-0.478992	0.478992	TD
xanthine metabolic process	31	0.0749197	-0.478992	0.478992	TD
glycerol-3-phosphate biosynthetic process	31	0.0749197	-0.478992	0.478992	TD
cyclomaltodextrinase activity	31	0.0749197	-0.478992	0.478992	TD
molybdopterin-synthase adenylyltransferase activity	31	0.0749197	-0.478992	0.478992	TD
cyclic pyranopterin monophosphate synthase activity	31	0.0749197	-0.478992	0.478992	TD
RNA polymerase binding	31	0.0749197	-0.478992	0.478992	TD
scopolin beta-glucosidase activity	31	0.0749197	-0.478992	0.478992	TD
tetracenomycin C biosynthetic process	31	0.0749197	-0.478992	0.478992	TD
adenylyl-sulfate reductase activity	88	0.0751007	0.478992	0.478992	Baseline
indoleacetamide hydrolase activity	88	0.0751007	0.478992	0.478992	Baseline
oxidoreductase activity, acting on the CH-CH group of donors, NAD or NADP as acceptor	88	0.075291	0.478992	0.478992	Baseline
viral life cycle	85	0.0762665	0.428571	0.428571	Baseline
AMP nucleosidase activity	34	0.0835219	-0.428571	0.428571	TD
substituted mannan metabolic process	87	0.0861103	0.462185	0.462185	Baseline
bacterial-type flagellum hook	32	0.0863154	-0.462185	0.462185	TD
hydroxyacylglutathione hydrolase activity	86.5	0.0864119	0.453782	0.453782	Baseline
peptide transmembrane transporter activity	86.5	0.0864119	0.453782	0.453782	Baseline
selenocysteine incorporation	32	0.0865462	-0.462185	0.462185	TD
DNA helicase activity	87	0.0865462	0.462185	0.462185	Baseline
damaged DNA binding	32	0.0865462	-0.462185	0.462185	TD
mRNA binding	87	0.0865462	0.462185	0.462185	Baseline
3-hydroxyacyl-CoA dehydrogenase activity	32	0.0865462	-0.462185	0.462185	TD
anthranilate synthase activity	32	0.0865462	-0.462185	0.462185	TD
glutamine-fructose-6-phosphate transaminase (isomerizing) activity	32	0.0865462	-0.462185	0.462185	TD
glutathione transferase activity	32	0.0865462	-0.462185	0.462185	TD
ribonuclease activity	87	0.0865462	0.462185	0.462185	Baseline
nucleoside diphosphate kinase activity	87	0.0865462	0.462185	0.462185	Baseline
chitinase activity	87	0.0865462	0.462185	0.462185	Baseline
phosphoribosylglycinamide formyltransferase activity	32	0.0865462	-0.462185	0.462185	TD
calcium ion binding	32	0.0865462	-0.462185	0.462185	TD
ATP binding	32	0.0865462	-0.462185	0.462185	TD
plasma membrane	32	0.0865462	-0.462185	0.462185	TD
glycine cleavage complex	87	0.0865462	0.462185	0.462185	Baseline
polysaccharide metabolic process	87	0.0865462	0.462185	0.462185	Baseline
glycogen catabolic process	87	0.0865462	0.462185	0.462185	Baseline
GTP biosynthetic process	87	0.0865462	0.462185	0.462185	Baseline
'de novo' IMP biosynthetic process	32	0.0865462	-0.462185	0.462185	TD
UTP biosynthetic process	87	0.0865462	0.462185	0.462185	Baseline
cysteine biosynthetic process from serine	32	0.0865462	-0.462185	0.462185	TD
glutamine catabolic process	32	0.0865462	-0.462185	0.462185	TD
regulation of pH	87	0.0865462	0.462185	0.462185	Baseline
metabolic process	87	0.0865462	0.462185	0.462185	Baseline
oxidized purine nucleobase lesion DNA N-glycosylase activity	32	0.0865462	-0.462185	0.462185	TD
glycolipid biosynthetic process	32	0.0865462	-0.462185	0.462185	TD
sigma factor antagonist activity	32	0.0865462	-0.462185	0.462185	TD
protein flavinylation	87	0.0865462	0.462185	0.462185	Baseline
DNA N-glycosylase activity	32	0.0865462	-0.462185	0.462185	TD
isopentenyl diphosphate biosynthetic process, methylerythritol 4-phosphate pathway	32	0.0865462	-0.462185	0.462185	TD
nicotinate nucleotide salvage	32	0.0865462	-0.462185	0.462185	TD
pyridoxal phosphate binding	32	0.0865462	-0.462185	0.462185	TD
chromosome condensation	32	0.0865462	-0.462185	0.462185	TD
negative regulation of sporulation resulting in formation of a cellular spore	32	0.0865462	-0.462185	0.462185	TD
phosphoribosylglycinamide formyltransferase 2 activity	87	0.0865462	0.462185	0.462185	Baseline
nucleoside-triphosphate diphosphatase activity	32	0.0865462	-0.462185	0.462185	TD
1,3-beta-galactosyl-N-acetylhexosamine phosphorylase activity	32	0.0865462	-0.462185	0.462185	TD
coproporphyrinogen dehydrogenase activity	32	0.0865462	-0.462185	0.462185	TD
UDP-N-acetylmuramoyl-L-alanyl-D-glutamyl-meso-2,6-diaminopimelyl-D-alanyl-D-alanine:undecaprenyl-phosphate transferase activity	32	0.0865462	-0.462185	0.462185	TD
raffinose alpha-galactosidase activity	87	0.0865462	0.462185	0.462185	Baseline
(S)-2-(5-amino-1-(5-phospho-D-ribosyl)imidazole-4-carboxamido)succinate AMP-lyase (fumarate-forming) activity	32	0.0865462	-0.462185	0.462185	TD
tRNA-guanine transglycosylation	32	0.0865462	-0.462185	0.462185	TD
viral DNA genome packaging	80.5	0.0869896	0.352941	0.352941	Baseline
diaminobutyrate-pyruvate transaminase activity	80.5	0.0869896	0.352941	0.352941	Baseline
rRNA (uridine-2'-O-)-methyltransferase activity	36.5	0.0886257	-0.386555	0.386555	TD
taurine transport	36.5	0.0886257	-0.386555	0.386555	TD
ADP-glyceromanno-heptose 6-epimerase activity	35	0.0887814	-0.411765	0.411765	TD
glucose-1-phosphatase activity	40	0.089288	-0.327731	0.327731	TD
oxoglutarate dehydrogenase complex	40	0.089288	-0.327731	0.327731	TD
isocitrate dehydrogenase (NAD+) activity	40	0.089288	-0.327731	0.327731	TD
bile-acid-CoA hydrolase activity	40	0.089288	-0.327731	0.327731	TD
arginine kinase activity	85	0.0897414	0.428571	0.428571	Baseline
cysteine biosynthetic process via cystathionine	86	0.0898635	0.445378	0.445378	Baseline
L-mimosine synthase activity	86	0.0898635	0.445378	0.445378	Baseline
hydroxymethylglutaryl-CoA reductase (NADPH) activity	86	0.0925136	0.445378	0.445378	Baseline
protein-disulfide reductase (glutathione) activity	33	0.0925136	-0.445378	0.445378	TD
glucan endo-1,3-beta-D-glucosidase activity	86	0.0961147	0.445378	0.445378	Baseline
nitric-oxide synthase activity	86	0.0983885	0.445378	0.445378	Baseline
NADH dehydrogenase (quinone) activity	86	0.0983885	0.445378	0.445378	Baseline
alkaline phosphatase activity	86	0.0986083	0.445378	0.445378	Baseline
N-acetylglucosamine transmembrane transporter activity	86	0.0986083	0.445378	0.445378	Baseline
organelle inner membrane	86	0.0986083	0.445378	0.445378	Baseline
polysaccharide transmembrane transporter activity	85.5	0.0989566	0.436975	0.436975	Baseline
hydrogen peroxide catabolic process	34	0.0993566	-0.428571	0.428571	TD
NAD+ diphosphatase activity	33	0.0994903	-0.445378	0.445378	TD
allantoin catabolic process	33	0.0994903	-0.445378	0.445378	TD
peptidoglycan metabolic process	86	0.0994903	0.445378	0.445378	Baseline
bacterial-type RNA polymerase core enzyme binding	86	0.0994903	0.445378	0.445378	Baseline
aldose 1-epimerase activity	86	0.0994903	0.445378	0.445378	Baseline
aspartate-semialdehyde dehydrogenase activity	86	0.0994903	0.445378	0.445378	Baseline
glutamate-ammonia ligase activity	33	0.0994903	-0.445378	0.445378	TD
hydroxyethylthiazole kinase activity	33	0.0994903	-0.445378	0.445378	TD
nucleotide-excision repair	33	0.0994903	-0.445378	0.445378	TD
tRNA aminoacylation for protein translation	86	0.0994903	0.445378	0.445378	Baseline
alanyl-tRNA aminoacylation	33	0.0994903	-0.445378	0.445378	TD
prolyl-tRNA aminoacylation	33	0.0994903	-0.445378	0.445378	TD
protein targeting	33	0.0994903	-0.445378	0.445378	TD
sodium ion transport	86	0.0994903	0.445378	0.445378	Baseline
tRNA processing	33	0.0994903	-0.445378	0.445378	TD
acetate CoA-transferase activity	33	0.0994903	-0.445378	0.445378	TD
diaminopimelate epimerase activity	33	0.0994903	-0.445378	0.445378	TD
cellular amino acid catabolic process	86	0.0994903	0.445378	0.445378	Baseline
gluconate transmembrane transporter activity	33	0.0994903	-0.445378	0.445378	TD
2-keto-3-deoxygluconate:proton symporter activity	33	0.0994903	-0.445378	0.445378	TD
precorrin-6A reductase activity	33	0.0994903	-0.445378	0.445378	TD
organic phosphonate catabolic process	86	0.0994903	0.445378	0.445378	Baseline
L-malate dehydrogenase activity	86	0.0994903	0.445378	0.445378	Baseline
DNA replication, Okazaki fragment processing	86	0.0994903	0.445378	0.445378	Baseline
racemase activity, acting on amino acids and derivatives	86	0.0994903	0.445378	0.445378	Baseline
negative regulation of transcription, DNA-templated	33	0.0994903	-0.445378	0.445378	TD
transition metal ion binding	33	0.0994903	-0.445378	0.445378	TD
glucose-1-phosphate cytidylyltransferase activity	33	0.0994903	-0.445378	0.445378	TD
aspartate racemase activity	33	0.0994903	-0.445378	0.445378	TD
galactose-6-phosphate isomerase activity	33	0.0994903	-0.445378	0.445378	TD
ribitol-5-phosphate 2-dehydrogenase activity	33	0.0994903	-0.445378	0.445378	TD
L-leucine transaminase activity	33	0.0994903	-0.445378	0.445378	TD
L-valine transaminase activity	33	0.0994903	-0.445378	0.445378	TD
L-isoleucine transaminase activity	33	0.0994903	-0.445378	0.445378	TD
iron ion homeostasis	33	0.0994903	-0.445378	0.445378	TD
NADP+ binding	86	0.0994903	0.445378	0.445378	Baseline
ubiquitin binding	85.5	0.102682	0.436975	0.436975	Baseline
HslUV protease complex	85.5	0.104577	0.436975	0.436975	Baseline
3-hydroxyisobutyrate dehydrogenase activity	85.5	0.104577	0.436975	0.436975	Baseline
glutathione catabolic process	41	0.107456	-0.310924	0.310924	TD
nickel cation transmembrane transporter activity	41	0.107456	-0.310924	0.310924	TD
N-methylhydantoinase (ATP-hydrolyzing) activity	41	0.107456	-0.310924	0.310924	TD
drug transmembrane transport	85	0.107954	0.428571	0.428571	Baseline
5-carboxymethyl-2-hydroxymuconate delta-isomerase activity	85	0.107954	0.428571	0.428571	Baseline
5-oxopent-3-ene-1,2,5-tricarboxylate decarboxylase activity	85	0.107954	0.428571	0.428571	Baseline
polyketide metabolic process	82	0.108182	0.378151	0.378151	Baseline
N-acetylglucosamine kinase activity	37	0.108182	-0.378151	0.378151	TD
oligosaccharide metabolic process	35	0.10897	-0.411765	0.411765	TD
methylmalonyl-CoA mutase activity	85	0.110776	0.428571	0.428571	Baseline
microtubule binding	85	0.110776	0.428571	0.428571	Baseline
diphosphomevalonate decarboxylase activity	83	0.111349	0.394958	0.394958	Baseline
L-methionine-(R)-S-oxide reductase activity	36	0.111349	-0.394958	0.394958	TD
intracellular signal transduction	85	0.112026	0.428571	0.428571	Baseline
nucleus	39	0.113801	-0.344538	0.344538	TD
double-strand break repair via homologous recombination	34	0.113856	-0.428571	0.428571	TD
alditol:NADP+ 1-oxidoreductase activity	34	0.113856	-0.428571	0.428571	TD
exo-alpha-sialidase activity	85	0.113856	0.428571	0.428571	Baseline
glucosylceramidase activity	85	0.113856	0.428571	0.428571	Baseline
nicotinate-nucleotide adenylyltransferase activity	85	0.113856	0.428571	0.428571	Baseline
ribonuclease P activity	34	0.113856	-0.428571	0.428571	TD
alpha-galactosidase activity	85	0.113856	0.428571	0.428571	Baseline
non-membrane spanning protein tyrosine kinase activity	34	0.113856	-0.428571	0.428571	TD
triose-phosphate isomerase activity	85	0.113856	0.428571	0.428571	Baseline
proline:sodium symporter activity	34	0.113856	-0.428571	0.428571	TD
alcohol metabolic process	34	0.113856	-0.428571	0.428571	TD
arginine biosynthetic process	34	0.113856	-0.428571	0.428571	TD
sphingolipid metabolic process	85	0.113856	0.428571	0.428571	Baseline
peptidase activity	34	0.113856	-0.428571	0.428571	TD
dTDP-glucose 4,6-dehydratase activity	85	0.113856	0.428571	0.428571	Baseline
DNA-3-methyladenine glycosylase activity	85	0.113856	0.428571	0.428571	Baseline
starch synthase activity	34	0.113856	-0.428571	0.428571	TD
methionine biosynthetic process	34	0.113856	-0.428571	0.428571	TD
nucleotide metabolic process	34	0.113856	-0.428571	0.428571	TD
nucleoid	34	0.113856	-0.428571	0.428571	TD
cell surface	34	0.113856	-0.428571	0.428571	TD
uracil transmembrane transporter activity	34	0.113856	-0.428571	0.428571	TD
proline transport	34	0.113856	-0.428571	0.428571	TD
small ribosomal subunit	85	0.113856	0.428571	0.428571	Baseline
mannan endo-1,4-beta-mannosidase activity	85	0.113856	0.428571	0.428571	Baseline
tRNA dihydrouridine synthase activity	34	0.113856	-0.428571	0.428571	TD
glycine N-methyltransferase activity	34	0.113856	-0.428571	0.428571	TD
cytolysis	34	0.113856	-0.428571	0.428571	TD
precorrin-2 C20-methyltransferase activity	34	0.113856	-0.428571	0.428571	TD
sodium ion binding	34	0.113856	-0.428571	0.428571	TD
pteridine-containing compound metabolic process	34	0.113856	-0.428571	0.428571	TD
periplasmic space	85	0.113856	0.428571	0.428571	Baseline
urea catabolic process	34	0.113856	-0.428571	0.428571	TD
oxidoreductase activity, acting on other nitrogenous compounds as donors, with NAD or NADP as acceptor	85	0.113856	0.428571	0.428571	Baseline
protein-heme linkage	37	0.118751	-0.378151	0.378151	TD
gamma-glutamyl-gamma-aminobutyrate hydrolase activity	84.5	0.1189	0.420168	0.420168	Baseline
Ran GTPase binding	84.5	0.1189	0.420168	0.420168	Baseline
galactarate catabolic process	34.5	0.1189	-0.420168	0.420168	TD
cellular aromatic compound metabolic process	84.5	0.119625	0.420168	0.420168	Baseline
lactose catabolic process via tagatose-6-phosphate	34.5	0.119625	-0.420168	0.420168	TD
DNA-binding transcription repressor activity	45	0.121913	-0.243697	0.243697	TD
23S rRNA (adenine(2085)-N(6))-dimethyltransferase activity	45	0.121913	-0.243697	0.243697	TD
mitochondrion	38	0.125177	-0.361345	0.361345	TD
4-pyridoxolactonase activity	81	0.125177	0.361345	0.361345	Baseline
23S rRNA (guanine(745)-N(1))-methyltransferase activity	84	0.125787	0.411765	0.411765	Baseline
hydroxypyruvate isomerase activity	42	0.128434	-0.294118	0.294118	TD
pectate lyase activity	42	0.128434	-0.294118	0.294118	TD
tRNA-dihydrouridine47 synthase activity	77	0.128434	0.294118	0.294118	Baseline
aryldialkylphosphatase activity	77	0.128434	0.294118	0.294118	Baseline
rRNA (guanine-N1-)-methyltransferase activity	77	0.128434	0.294118	0.294118	Baseline
mandelate racemase activity	77	0.128434	0.294118	0.294118	Baseline
morphine 6-dehydrogenase activity	42	0.128434	-0.294118	0.294118	TD
acetoin catabolic process	77	0.128434	0.294118	0.294118	Baseline
adenine deaminase activity	35	0.129701	-0.411765	0.411765	TD
DNA-binding transcription activator activity	84	0.129701	0.411765	0.411765	Baseline
RNA binding	35	0.129701	-0.411765	0.411765	TD
GMP reductase activity	84	0.129701	0.411765	0.411765	Baseline
GTP cyclohydrolase II activity	84	0.129701	0.411765	0.411765	Baseline
O-acetylhomoserine aminocarboxypropyltransferase activity	35	0.129701	-0.411765	0.411765	TD
aspartate kinase activity	35	0.129701	-0.411765	0.411765	TD
malate dehydrogenase (decarboxylating) (NADP+) activity	35	0.129701	-0.411765	0.411765	TD
phosphoglycerate dehydrogenase activity	35	0.129701	-0.411765	0.411765	TD
phosphoribosylaminoimidazolecarboxamide formyltransferase activity	84	0.129701	0.411765	0.411765	Baseline
pyruvate kinase activity	35	0.129701	-0.411765	0.411765	TD
aminoacyl-tRNA ligase activity	84	0.129701	0.411765	0.411765	Baseline
alanine-tRNA ligase activity	35	0.129701	-0.411765	0.411765	TD
leucine-tRNA ligase activity	84	0.129701	0.411765	0.411765	Baseline
uridine kinase activity	35	0.129701	-0.411765	0.411765	TD
extracellular region	84	0.129701	0.411765	0.411765	Baseline
acetyl-CoA biosynthetic process	35	0.129701	-0.411765	0.411765	TD
IMP biosynthetic process	35	0.129701	-0.411765	0.411765	TD
RNA catabolic process	84	0.129701	0.411765	0.411765	Baseline
leucyl-tRNA aminoacylation	84	0.129701	0.411765	0.411765	Baseline
regulation of translational fidelity	35	0.129701	-0.411765	0.411765	TD
protoporphyrinogen IX biosynthetic process	35	0.129701	-0.411765	0.411765	TD
riboflavin kinase activity	84	0.129701	0.411765	0.411765	Baseline
acetaldehyde dehydrogenase (acetylating) activity	35	0.129701	-0.411765	0.411765	TD
glutamyl-tRNA reductase activity	35	0.129701	-0.411765	0.411765	TD
peptidoglycan turnover	84	0.129701	0.411765	0.411765	Baseline
threonine transport	35	0.129701	-0.411765	0.411765	TD
iron-sulfur cluster assembly	35	0.129701	-0.411765	0.411765	TD
dephosphorylation	35	0.129701	-0.411765	0.411765	TD
racemase and epimerase activity, acting on amino acids and derivatives	84	0.129701	0.411765	0.411765	Baseline
intramolecular oxidoreductase activity, interconverting aldoses and ketoses	35	0.129701	-0.411765	0.411765	TD
5-oxoprolinase (ATP-hydrolyzing) activity	35	0.129701	-0.411765	0.411765	TD
sporulation resulting in formation of a cellular spore	35	0.129701	-0.411765	0.411765	TD
serine transport	35	0.129701	-0.411765	0.411765	TD
ATP-binding cassette (ABC) transporter complex	35	0.129701	-0.411765	0.411765	TD
carbon-monoxide dehydrogenase (ferredoxin) activity	35	0.129701	-0.411765	0.411765	TD
'de novo' UMP biosynthetic process	35	0.129701	-0.411765	0.411765	TD
L-arabinose metabolic process	84	0.129701	0.411765	0.411765	Baseline
2-aminoethylphosphonate-pyruvate transaminase activity	84	0.129701	0.411765	0.411765	Baseline
2 iron, 2 sulfur cluster binding	35	0.129701	-0.411765	0.411765	TD
1-deoxy-D-xylulose 5-phosphate biosynthetic process	35	0.129701	-0.411765	0.411765	TD
alpha-D-xyloside xylohydrolase	35	0.129701	-0.411765	0.411765	TD
GTP 3',8'-cyclase activity	35	0.129701	-0.411765	0.411765	TD
NADPH binding	35	0.129701	-0.411765	0.411765	TD
NAD+ binding	35	0.129701	-0.411765	0.411765	TD
undecaprenyl-phosphate 4-deoxy-4-formamido-L-arabinose transferase activity	35	0.129701	-0.411765	0.411765	TD
protein N-linked glycosylation	40	0.133028	-0.327731	0.327731	TD
protein tag	83.5	0.135483	0.403361	0.403361	Baseline
UMP biosynthetic process	83	0.139177	0.394958	0.394958	Baseline
transcription corepressor activity	51	0.142453	-0.142857	0.142857	TD
endoribonuclease activity, producing 3'-phosphomonoesters	51	0.142453	-0.142857	0.142857	TD
2-hydroxy-6-oxonona-2,4-dienedioate hydrolase activity	51	0.142453	-0.142857	0.142857	TD
glycine oxidase activity	51	0.142453	-0.142857	0.142857	TD
ketotetrose-phosphate aldolase activity	51	0.142453	-0.142857	0.142857	TD
positive regulation of helicase activity	51	0.142453	-0.142857	0.142857	TD
coenzyme F420-0:L-glutamate ligase activity	51	0.142453	-0.142857	0.142857	TD
2-hydroxy-6-oxonona-2,4,7-trienedioate hydrolase activity	51	0.142453	-0.142857	0.142857	TD
mRNA cleavage involved in gene silencing	51	0.142453	-0.142857	0.142857	TD
unsaturated chondroitin disaccharide hydrolase activity	51	0.142453	-0.142857	0.142857	TD
septum digestion after cytokinesis	51	0.142453	-0.142857	0.142857	TD
bacterial-type RNA polymerase core promoter sequence-specific DNA binding	51	0.142453	-0.142857	0.142857	TD
transcription antitermination factor activity, RNA binding	51	0.142453	-0.142857	0.142857	TD
autolysis	51	0.142453	-0.142857	0.142857	TD
tRNA wobble base modification	51	0.142453	-0.142857	0.142857	TD
L-tyrosine:2-oxoglutarate aminotransferase activity	51	0.142453	-0.142857	0.142857	TD
enzyme inhibitor activity	51	0.142453	-0.142857	0.142857	TD
L-tyrosine transmembrane transporter activity	51	0.142453	-0.142857	0.142857	TD
zinc ion transmembrane transporter activity	51	0.142453	-0.142857	0.142857	TD
FK506 binding	51	0.142453	-0.142857	0.142857	TD
fructose catabolic process	51	0.142453	-0.142857	0.142857	TD
chitin catabolic process	51	0.142453	-0.142857	0.142857	TD
oxidative phosphorylation	51	0.142453	-0.142857	0.142857	TD
uridine catabolic process	51	0.142453	-0.142857	0.142857	TD
response to osmotic stress	51	0.142453	-0.142857	0.142857	TD
N-acetyltransferase activity	51	0.142453	-0.142857	0.142857	TD
nucleotidase activity	51	0.142453	-0.142857	0.142857	TD
sulfate transport	51	0.142453	-0.142857	0.142857	TD
single-stranded DNA 3'-5' exodeoxyribonuclease activity	51	0.142453	-0.142857	0.142857	TD
ribonuclease inhibitor activity	51	0.142453	-0.142857	0.142857	TD
(2,3-dihydroxybenzoyl)adenylate synthase activity	51	0.142453	-0.142857	0.142857	TD
2-octaprenyl-6-methoxyphenol hydroxylase activity	51	0.142453	-0.142857	0.142857	TD
ADP-heptose-lipopolysaccharide heptosyltransferase activity	51	0.142453	-0.142857	0.142857	TD
succinylglutamate desuccinylase activity	51	0.142453	-0.142857	0.142857	TD
hypoxanthine catabolic process	51	0.142453	-0.142857	0.142857	TD
colanic acid biosynthetic process	51	0.142453	-0.142857	0.142857	TD
O antigen biosynthetic process	51	0.142453	-0.142857	0.142857	TD
formate dehydrogenase complex	51	0.142453	-0.142857	0.142857	TD
N-acetyl-anhydromuramoyl-L-alanine amidase activity	51	0.142453	-0.142857	0.142857	TD
toxin catabolic process	51	0.142453	-0.142857	0.142857	TD
response to light stimulus	51	0.142453	-0.142857	0.142857	TD
bacterial-type flagellum basal body, distal rod	51	0.142453	-0.142857	0.142857	TD
gamma-aminobutyric acid catabolic process	51	0.142453	-0.142857	0.142857	TD
response to organonitrogen compound	51	0.142453	-0.142857	0.142857	TD
detoxification of copper ion	51	0.142453	-0.142857	0.142857	TD
response to organic cyclic compound	51	0.142453	-0.142857	0.142857	TD
gamma-aminobutyric acid transmembrane transporter activity	51	0.142453	-0.142857	0.142857	TD
L-phenylalanine transmembrane transporter activity	51	0.142453	-0.142857	0.142857	TD
L-tryptophan transmembrane transporter activity	51	0.142453	-0.142857	0.142857	TD
cytidine transmembrane transporter activity	51	0.142453	-0.142857	0.142857	TD
uridine transmembrane transporter activity	51	0.142453	-0.142857	0.142857	TD
pyrimidine nucleoside transmembrane transporter activity	51	0.142453	-0.142857	0.142857	TD
solute:proton symporter activity	51	0.142453	-0.142857	0.142857	TD
peptide:proton symporter activity	51	0.142453	-0.142857	0.142857	TD
nucleoside:proton symporter activity	51	0.142453	-0.142857	0.142857	TD
galactose:proton symporter activity	51	0.142453	-0.142857	0.142857	TD
arabinose:proton symporter activity	51	0.142453	-0.142857	0.142857	TD
fucose:proton symporter activity	51	0.142453	-0.142857	0.142857	TD
sulfathiazole transmembrane transporter activity	51	0.142453	-0.142857	0.142857	TD
arabinose transmembrane transport	51	0.142453	-0.142857	0.142857	TD
D-xylose transmembrane transport	51	0.142453	-0.142857	0.142857	TD
fucose transmembrane transport	51	0.142453	-0.142857	0.142857	TD
phenylalanine transport	51	0.142453	-0.142857	0.142857	TD
tryptophan transport	51	0.142453	-0.142857	0.142857	TD
tyrosine transport	51	0.142453	-0.142857	0.142857	TD
purine nucleoside transmembrane transport	51	0.142453	-0.142857	0.142857	TD
uridine transport	51	0.142453	-0.142857	0.142857	TD
pyrimidine nucleoside transport	51	0.142453	-0.142857	0.142857	TD
guanosine tetraphosphate biosynthetic process	51	0.142453	-0.142857	0.142857	TD
guanosine pentaphosphate catabolic process	51	0.142453	-0.142857	0.142857	TD
rRNA (uridine) methyltransferase activity	51	0.142453	-0.142857	0.142857	TD
2-oxoglutarate-dependent dioxygenase activity	51	0.142453	-0.142857	0.142857	TD
AU-rich element binding	51	0.142453	-0.142857	0.142857	TD
peptidyl-serine phosphopantetheinylation	51	0.142453	-0.142857	0.142857	TD
alcohol dehydrogenase NAD(P)+ activity	51	0.142453	-0.142857	0.142857	TD
(R)-limonene 1,2-monooxygenase activity	51	0.142453	-0.142857	0.142857	TD
glycolate dehydrogenase activity	51	0.142453	-0.142857	0.142857	TD
glucarate catabolic process	51	0.142453	-0.142857	0.142857	TD
arginine catabolic process to glutamate	51	0.142453	-0.142857	0.142857	TD
anaerobic glycerol catabolic process	51	0.142453	-0.142857	0.142857	TD
mixed acid fermentation	51	0.142453	-0.142857	0.142857	TD
L-ascorbic acid catabolic process	51	0.142453	-0.142857	0.142857	TD
lysine biosynthetic process via aminoadipic acid	51	0.142453	-0.142857	0.142857	TD
testosterone dehydrogenase NAD(P) activity	51	0.142453	-0.142857	0.142857	TD
protein kinase activator activity	51	0.142453	-0.142857	0.142857	TD
peptidyl-arginine hydroxylation	51	0.142453	-0.142857	0.142857	TD
intrinsic component of cell outer membrane	51	0.142453	-0.142857	0.142857	TD
intrinsic component of the cytoplasmic side of the plasma membrane	51	0.142453	-0.142857	0.142857	TD
periplasmic side of cell outer membrane	51	0.142453	-0.142857	0.142857	TD
chloride ion binding	51	0.142453	-0.142857	0.142857	TD
ubiquinone biosynthetic process via 3,4-dihydroxy-5-polyprenylbenzoate	51	0.142453	-0.142857	0.142857	TD
adenosine transport	51	0.142453	-0.142857	0.142857	TD
regulation of ion transmembrane transporter activity	51	0.142453	-0.142857	0.142857	TD
hydroperoxide reductase activity	51	0.142453	-0.142857	0.142857	TD
aminophosphonate metabolic process	51	0.142453	-0.142857	0.142857	TD
response to hydroperoxide	51	0.142453	-0.142857	0.142857	TD
L-lysine catabolic process to acetyl-CoA via saccharopine	51	0.142453	-0.142857	0.142857	TD
fatty acid beta-oxidation, unsaturated, even number, reductase/isomerase pathway	51	0.142453	-0.142857	0.142857	TD
L-phenylalanine biosynthetic process from chorismate via phenylpyruvate	51	0.142453	-0.142857	0.142857	TD
L-galactonate catabolic process	51	0.142453	-0.142857	0.142857	TD
protein hexamerization	51	0.142453	-0.142857	0.142857	TD
dipeptide transmembrane transport	51	0.142453	-0.142857	0.142857	TD
tripeptide transmembrane transport	51	0.142453	-0.142857	0.142857	TD
L-ascorbate 6-phosphate lactonase activity	51	0.142453	-0.142857	0.142857	TD
oligopeptide transmembrane transporter activity	51	0.142453	-0.142857	0.142857	TD
carbamoyl phosphate catabolic process	51	0.142453	-0.142857	0.142857	TD
4-amino-4-deoxy-alpha-L-arabinopyranosyl undecaprenyl phosphate biosynthetic process	51	0.142453	-0.142857	0.142857	TD
anchored component of periplasmic side of cell outer membrane	51	0.142453	-0.142857	0.142857	TD
vitamin K biosynthetic process	51	0.142453	-0.142857	0.142857	TD
response to starvation	51	0.142453	-0.142857	0.142857	TD
riboflavin reductase (NADPH) activity	51	0.142453	-0.142857	0.142857	TD
molybdenum ion transmembrane transporter activity	51	0.142453	-0.142857	0.142857	TD
alkanesulfonate transport	51	0.142453	-0.142857	0.142857	TD
enterobactin transport	51	0.142453	-0.142857	0.142857	TD
tripeptide transmembrane transporter activity	51	0.142453	-0.142857	0.142857	TD
alkanesulfonate transmembrane transporter activity	51	0.142453	-0.142857	0.142857	TD
negative regulation of apoptotic process	51	0.142453	-0.142857	0.142857	TD
negative regulation of catalytic activity	51	0.142453	-0.142857	0.142857	TD
receptor clustering	51	0.142453	-0.142857	0.142857	TD
sulfate binding	51	0.142453	-0.142857	0.142857	TD
2-octaprenyl-6-methoxy-1,4-benzoquinone methylase activity	51	0.142453	-0.142857	0.142857	TD
regulation of fucose catabolic process	51	0.142453	-0.142857	0.142857	TD
post-translational protein modification	51	0.142453	-0.142857	0.142857	TD
cell adhesion involved in biofilm formation	51	0.142453	-0.142857	0.142857	TD
acryloyl-CoA reductase (NADP+) activity	51	0.142453	-0.142857	0.142857	TD
single-species biofilm formation on inanimate substrate	51	0.142453	-0.142857	0.142857	TD
Ni-Fe hydrogenase complex	51	0.142453	-0.142857	0.142857	TD
(R)-carnitine:4-(trimethylammonio)butanoate antiporter activity	51	0.142453	-0.142857	0.142857	TD
NarGHI complex	51	0.142453	-0.142857	0.142857	TD
integral component of cell outer membrane	51	0.142453	-0.142857	0.142857	TD
slime layer polysaccharide biosynthetic process	51	0.142453	-0.142857	0.142857	TD
D-gluconate catabolic process	51	0.142453	-0.142857	0.142857	TD
glycolate biosynthetic process	51	0.142453	-0.142857	0.142857	TD
methylisocitrate lyase activity	51	0.142453	-0.142857	0.142857	TD
short-chain fatty acid metabolic process	51	0.142453	-0.142857	0.142857	TD
D-xylulose reductase activity	51	0.142453	-0.142857	0.142857	TD
D-malate dehydrogenase (decarboxylating) activity	51	0.142453	-0.142857	0.142857	TD
regulation of lipid biosynthetic process	51	0.142453	-0.142857	0.142857	TD
3-carboxyethylcatechol 2,3-dioxygenase activity	51	0.142453	-0.142857	0.142857	TD
4-hydroxy-4-methyl-2-oxoglutarate aldolase activity	51	0.142453	-0.142857	0.142857	TD
protein N-terminus binding	51	0.142453	-0.142857	0.142857	TD
2,3-dihydroxybenzoate-serine ligase activity	51	0.142453	-0.142857	0.142857	TD
amino-acid racemase activity	51	0.142453	-0.142857	0.142857	TD
D-methionine transport	51	0.142453	-0.142857	0.142857	TD
azobenzene reductase activity	51	0.142453	-0.142857	0.142857	TD
IMP 5'-nucleotidase activity	51	0.142453	-0.142857	0.142857	TD
GMP 5'-nucleotidase activity	51	0.142453	-0.142857	0.142857	TD
negative chemotaxis	51	0.142453	-0.142857	0.142857	TD
protein homooligomerization	51	0.142453	-0.142857	0.142857	TD
positive regulation of hydrolase activity	51	0.142453	-0.142857	0.142857	TD
metal cluster binding	51	0.142453	-0.142857	0.142857	TD
methylglyoxal catabolic process	51	0.142453	-0.142857	0.142857	TD
(S)-limonene 1,2-monooxygenase activity	51	0.142453	-0.142857	0.142857	TD
tRNA (uracil-2'-O-)-methyltransferase activity	51	0.142453	-0.142857	0.142857	TD
tRNA (cytosine-2'-O-)-methyltransferase activity	51	0.142453	-0.142857	0.142857	TD
tRNA-specific adenosine-34 deaminase complex	51	0.142453	-0.142857	0.142857	TD
cell pole	51	0.142453	-0.142857	0.142857	TD
lysozyme inhibitor activity	51	0.142453	-0.142857	0.142857	TD
negative regulation of DNA-templated transcription, termination	51	0.142453	-0.142857	0.142857	TD
3-sulfolactaldehyde reductase activity	51	0.142453	-0.142857	0.142857	TD
alpha-D-ribose 1-methylphosphonate 5-triphosphate synthase activity	51	0.142453	-0.142857	0.142857	TD
alpha-D-ribose 1-methylphosphonate 5-triphosphate synthase complex	51	0.142453	-0.142857	0.142857	TD
carbon monoxide binding	51	0.142453	-0.142857	0.142857	TD
protein homotrimerization	51	0.142453	-0.142857	0.142857	TD
cellular response to hydrogen peroxide	51	0.142453	-0.142857	0.142857	TD
NADH binding	51	0.142453	-0.142857	0.142857	TD
cellular response to cold	51	0.142453	-0.142857	0.142857	TD
cellular response to antibiotic	51	0.142453	-0.142857	0.142857	TD
integral component of external side of plasma membrane	51	0.142453	-0.142857	0.142857	TD
pyrimidine-containing compound transmembrane transport	51	0.142453	-0.142857	0.142857	TD
tRNA m6t6A37 methyltransferase activity	51	0.142453	-0.142857	0.142857	TD
regulation of cellular organohalogen metabolic process	51	0.142453	-0.142857	0.142857	TD
bacterial cellulose biosynthetic process	51	0.142453	-0.142857	0.142857	TD
protein-phosphocysteine-sugar phosphotransferase activity	51	0.142453	-0.142857	0.142857	TD
L-glutamate biosynthetic process	51	0.142453	-0.142857	0.142857	TD
glutathione oxidoreductase activity	51	0.142453	-0.142857	0.142857	TD
ligand-activated transcription factor activity	51	0.142453	-0.142857	0.142857	TD
toxin-antitoxin complex	51	0.142453	-0.142857	0.142857	TD
4-(trimethylammonio)butanoate transport	51	0.142453	-0.142857	0.142857	TD
regulation of bacterial-type flagellum-dependent cell motility	51	0.142453	-0.142857	0.142857	TD
positive regulation of bacterial-type flagellum assembly	51	0.142453	-0.142857	0.142857	TD
6-sulfoquinovose(1-) catabolic process	51	0.142453	-0.142857	0.142857	TD
methylglyoxal reductase (NADPH-dependent, acetol producing)	51	0.142453	-0.142857	0.142857	TD
MacAB-TolC complex	51	0.142453	-0.142857	0.142857	TD
double-stranded DNA endodeoxyribonuclease activity	51	0.142453	-0.142857	0.142857	TD
efflux pump complex	51	0.142453	-0.142857	0.142857	TD
positive regulation of DNA-templated transcription, initiation	51	0.142453	-0.142857	0.142857	TD
aldehyde dehydrogenase NAD(P)+ activity	51	0.142453	-0.142857	0.142857	TD
aldo-keto reductase (NADP) activity	51	0.142453	-0.142857	0.142857	TD
arginyltransferase activity	51	0.142453	-0.142857	0.142857	TD
high-affinity L-histidine transmembrane transporter activity	51	0.142453	-0.142857	0.142857	TD
intermediate filament	51	0.142453	-0.142857	0.142857	TD
dicarboxylic acid transport	51	0.142453	-0.142857	0.142857	TD
L-methionine transmembrane transporter activity	51	0.142453	-0.142857	0.142857	TD
oxygen transport	51	0.142453	-0.142857	0.142857	TD
nucleobase-containing small molecule interconversion	51	0.142453	-0.142857	0.142857	TD
oxidoreductase activity, oxidizing metal ions, oxygen as acceptor	51	0.142453	-0.142857	0.142857	TD
DNA/RNA helicase activity	51	0.142453	-0.142857	0.142857	TD
nucleotide-excision repair, DNA incision	51	0.142453	-0.142857	0.142857	TD
cellular response to cell envelope stress	51	0.142453	-0.142857	0.142857	TD
cellular modified amino acid biosynthetic process	51	0.142453	-0.142857	0.142857	TD
negative regulation of proteolysis	51	0.142453	-0.142857	0.142857	TD
L-idonate catabolic process	51	0.142453	-0.142857	0.142857	TD
oxidoreductase activity, acting on X-H and Y-H to form an X-Y bond	51	0.142453	-0.142857	0.142857	TD
D-methionine transmembrane transporter activity	51	0.142453	-0.142857	0.142857	TD
poly(3-hydroxybutyrate) depolymerase activity	51	0.142453	-0.142857	0.142857	TD
medium-chain fatty acid biosynthetic process	51	0.142453	-0.142857	0.142857	TD
medium-chain fatty acid catabolic process	51	0.142453	-0.142857	0.142857	TD
cellular response to zinc ion	51	0.142453	-0.142857	0.142857	TD
ubiquitin-dependent protein catabolic process via the N-end rule pathway	51	0.142453	-0.142857	0.142857	TD
L-histidine transmembrane transport	51	0.142453	-0.142857	0.142857	TD
plasma membrane protein complex	51	0.142453	-0.142857	0.142857	TD
aminodeoxyfutalosine synthase activity	51	0.142453	-0.142857	0.142857	TD
L-histidine import across plasma membrane	51	0.142453	-0.142857	0.142857	TD
mitochondrial membrane	51	0.142453	-0.142857	0.142857	TD
5'-tyrosyl-DNA phosphodiesterase activity	51	0.142453	-0.142857	0.142857	TD
acyl-L-homoserine-lactone lactonohydrolase activity	51	0.142453	-0.142857	0.142857	TD
deoxyadenosine kinase activity	51	0.142453	-0.142857	0.142857	TD
heme-copper terminal oxidase activity	51	0.142453	-0.142857	0.142857	TD
2-keto-3-deoxy-L-rhamnonate aldolase activity	51	0.142453	-0.142857	0.142857	TD
anion transmembrane transporter activity	51	0.142453	-0.142857	0.142857	TD
D-amino-acid dehydrogenase activity	51	0.142453	-0.142857	0.142857	TD
palmitoleoyl acyl-carrier-protein-dependent acyltransferase activity	51	0.142453	-0.142857	0.142857	TD
ethanolamine ammonia-lyase complex	51	0.142453	-0.142857	0.142857	TD
putrescine catabolic process	51	0.142453	-0.142857	0.142857	TD
single-stranded DNA helicase activity	51	0.142453	-0.142857	0.142857	TD
DNA duplex unwinding	51	0.142453	-0.142857	0.142857	TD
gluconate transmembrane transport	51	0.142453	-0.142857	0.142857	TD
23S rRNA (adenine(2030)-N(6))-methyltransferase activity	51	0.142453	-0.142857	0.142857	TD
L-fucose metabolic process	51	0.142453	-0.142857	0.142857	TD
fucose binding	51	0.142453	-0.142857	0.142857	TD
4-hydroxybutyrate dehydrogenase activity	51	0.142453	-0.142857	0.142857	TD
lactate 2-monooxygenase activity	51	0.142453	-0.142857	0.142857	TD
N-acetylneuraminate synthase activity	51	0.142453	-0.142857	0.142857	TD
double-stranded DNA 5'-3' exodeoxyribonuclease activity	51	0.142453	-0.142857	0.142857	TD
D-alanine catabolic process	51	0.142453	-0.142857	0.142857	TD
6-deoxy-6-sulfofructose-1-phosphate aldolase activity	51	0.142453	-0.142857	0.142857	TD
positive regulation of cell motility	51	0.142453	-0.142857	0.142857	TD
nitrilase activity	51	0.142453	-0.142857	0.142857	TD
protein methylation	51	0.142453	-0.142857	0.142857	TD
rRNA (adenine-N6-)-methyltransferase activity	51	0.142453	-0.142857	0.142857	TD
uniporter activity	51	0.142453	-0.142857	0.142857	TD
oligosaccharide transport	51	0.142453	-0.142857	0.142857	TD
polyprenol biosynthetic process	51	0.142453	-0.142857	0.142857	TD
single-stranded DNA-dependent ATP-dependent DNA helicase complex	51	0.142453	-0.142857	0.142857	TD
molybdate ion binding	51	0.142453	-0.142857	0.142857	TD
ncRNA catabolic process	51	0.142453	-0.142857	0.142857	TD
formate dehydrogenase (quinone) activity	51	0.142453	-0.142857	0.142857	TD
Cys-tRNA(Pro) hydrolase activity	51	0.142453	-0.142857	0.142857	TD
response to chromate	51	0.142453	-0.142857	0.142857	TD
cysteine-S-conjugate beta-lyase activity	51	0.142453	-0.142857	0.142857	TD
D-arabinitol 4-dehydrogenase activity	51	0.142453	-0.142857	0.142857	TD
negative regulation of protein secretion	51	0.142453	-0.142857	0.142857	TD
diacetylchitobiose metabolic process	51	0.142453	-0.142857	0.142857	TD
trehalose metabolism in response to cold stress	51	0.142453	-0.142857	0.142857	TD
cellular response to lead ion	51	0.142453	-0.142857	0.142857	TD
regulation of single-species biofilm formation	51	0.142453	-0.142857	0.142857	TD
tungstate binding	51	0.142453	-0.142857	0.142857	TD
mitochondrial respiratory chain complex I	51	0.142453	-0.142857	0.142857	TD
aspartate biosynthetic process	51	0.142453	-0.142857	0.142857	TD
aromatic-amino-acid:2-oxoglutarate aminotransferase activity	51	0.142453	-0.142857	0.142857	TD
tyrosine biosynthetic process from chorismate via 4-hydroxyphenylpyruvate	51	0.142453	-0.142857	0.142857	TD
L-leucine:2-oxoglutarate aminotransferase activity	51	0.142453	-0.142857	0.142857	TD
2-octoprenyl-3-methyl-6-methoxy-1,4-benzoquinone hydroxylase activity	51	0.142453	-0.142857	0.142857	TD
GDP-mannose mannosyl hydrolase activity	51	0.142453	-0.142857	0.142857	TD
D-ribose transmembrane transport	51	0.142453	-0.142857	0.142857	TD
NAD(P)H nitroreductase activity	51	0.142453	-0.142857	0.142857	TD
2,4,6-trinitrotoluene catabolic process	51	0.142453	-0.142857	0.142857	TD
positive chemotaxis	51	0.142453	-0.142857	0.142857	TD
sulfite reductase activity	51	0.142453	-0.142857	0.142857	TD
trans-1,2-dihydrobenzene-1,2-diol dehydrogenase activity	36	0.143212	-0.394958	0.394958	TD
ADP-ribosyl-dinitrogen reductase hydrolase activity	83	0.143212	0.394958	0.394958	Baseline
cytoplasmic translation	39	0.144185	-0.344538	0.344538	TD
protein-glutamine gamma-glutamyltransferase activity	82.5	0.145441	0.386555	0.386555	Baseline
peptide cross-linking	82.5	0.145441	0.386555	0.386555	Baseline
aerobic respiration	38	0.146027	-0.361345	0.361345	TD
holo-citrate lyase synthase activity	38	0.146027	-0.361345	0.361345	TD
histidine biosynthetic process	36	0.147123	-0.394958	0.394958	TD
6-phosphofructokinase activity	36	0.147123	-0.394958	0.394958	TD
acid phosphatase activity	83	0.147123	0.394958	0.394958	Baseline
dephospho-CoA kinase activity	36	0.147123	-0.394958	0.394958	TD
dihydropteroate synthase activity	83	0.147123	0.394958	0.394958	Baseline
dihydrouracil dehydrogenase (NAD+) activity	83	0.147123	0.394958	0.394958	Baseline
long-chain fatty acid-CoA ligase activity	83	0.147123	0.394958	0.394958	Baseline
phosphoribosylformylglycinamidine synthase activity	83	0.147123	0.394958	0.394958	Baseline
purine-nucleoside phosphorylase activity	36	0.147123	-0.394958	0.394958	TD
triglyceride lipase activity	36	0.147123	-0.394958	0.394958	TD
xylulose metabolic process	36	0.147123	-0.394958	0.394958	TD
peptide metabolic process	83	0.147123	0.394958	0.394958	Baseline
methionine metabolic process	36	0.147123	-0.394958	0.394958	TD
fatty acid biosynthetic process	36	0.147123	-0.394958	0.394958	TD
glycogen phosphorylase activity	36	0.147123	-0.394958	0.394958	TD
N-acetylmuramoyl-L-alanine amidase activity	83	0.147123	0.394958	0.394958	Baseline
beta-phosphoglucomutase activity	36	0.147123	-0.394958	0.394958	TD
citrate (pro-3S)-lyase activity	36	0.147123	-0.394958	0.394958	TD
homoserine O-succinyltransferase activity	36	0.147123	-0.394958	0.394958	TD
methylglyoxal synthase activity	83	0.147123	0.394958	0.394958	Baseline
branched-chain amino acid biosynthetic process	36	0.147123	-0.394958	0.394958	TD
chromate transmembrane transporter activity	83	0.147123	0.394958	0.394958	Baseline
amino acid transmembrane transporter activity	36	0.147123	-0.394958	0.394958	TD
methionine transport	36	0.147123	-0.394958	0.394958	TD
arginine deiminase activity	36	0.147123	-0.394958	0.394958	TD
viral capsid assembly	83	0.147123	0.394958	0.394958	Baseline
methylglyoxal biosynthetic process	83	0.147123	0.394958	0.394958	Baseline
L-methionine biosynthetic process from homoserine via O-succinyl-L-homoserine and cystathionine	36	0.147123	-0.394958	0.394958	TD
dTDP-rhamnose biosynthetic process	36	0.147123	-0.394958	0.394958	TD
mannitol metabolic process	83	0.147123	0.394958	0.394958	Baseline
asexual sporulation	36	0.147123	-0.394958	0.394958	TD
heat shock protein binding	36	0.147123	-0.394958	0.394958	TD
proton-transporting V-type ATPase, V0 domain	36	0.147123	-0.394958	0.394958	TD
7,8-dihydroneopterin 3'-triphosphate biosynthetic process	83	0.147123	0.394958	0.394958	Baseline
formate-C-acetyltransferase-activating enzyme activity	36	0.147123	-0.394958	0.394958	TD
adenosylcobinamide kinase activity	36	0.147123	-0.394958	0.394958	TD
S-methyl-5-thioribose kinase activity	36	0.147123	-0.394958	0.394958	TD
lactate racemase activity	36	0.147123	-0.394958	0.394958	TD
protein complex oligomerization	83	0.147123	0.394958	0.394958	Baseline
sirohydrochlorin ferrochelatase activity	36	0.147123	-0.394958	0.394958	TD
response to redox state	36	0.147123	-0.394958	0.394958	TD
epoxyqueuosine reductase activity	36	0.147123	-0.394958	0.394958	TD
selenocysteinyl-tRNA(Sec) biosynthetic process	36	0.147123	-0.394958	0.394958	TD
decanoate-CoA ligase activity	83	0.147123	0.394958	0.394958	Baseline
thiamine-phosphate kinase activity	82.5	0.14987	0.386555	0.386555	Baseline
hydroxymethylglutaryl-CoA reductase activity	79	0.150483	0.327731	0.327731	Baseline
2-polyprenyl-6-methoxy-1,4-benzoquinone methyltransferase activity	46	0.150915	-0.226891	0.226891	TD
peptidyl-methionine modification	46	0.150915	-0.226891	0.226891	TD
N-terminal protein amino acid modification	46	0.150915	-0.226891	0.226891	TD
fatty acid beta-oxidation using acyl-CoA dehydrogenase	46	0.150915	-0.226891	0.226891	TD
co-translational protein modification	46	0.150915	-0.226891	0.226891	TD
polyol catabolic process	46	0.150915	-0.226891	0.226891	TD
23S rRNA (guanine(1835)-N(2))-methyltransferase activity	46	0.150915	-0.226891	0.226891	TD
RNA-3'-phosphate cyclase activity	46	0.150915	-0.226891	0.226891	TD
endopeptidase activity	46	0.150915	-0.226891	0.226891	TD
negative regulation of DNA-dependent DNA replication initiation	46	0.150915	-0.226891	0.226891	TD
steroid dehydrogenase activity, acting on the CH-OH group of donors, NAD or NADP as acceptor	46	0.150915	-0.226891	0.226891	TD
propionate-CoA ligase activity	46	0.150915	-0.226891	0.226891	TD
ubiquitin protein ligase activity	46	0.150915	-0.226891	0.226891	TD
taurine dioxygenase activity	46	0.150915	-0.226891	0.226891	TD
protein ubiquitination	46	0.150915	-0.226891	0.226891	TD
4-hydroxybenzoate-CoA ligase activity	46	0.150915	-0.226891	0.226891	TD
ubiquitin protein ligase binding	46	0.150915	-0.226891	0.226891	TD
succinylornithine transaminase activity	43	0.152466	-0.277311	0.277311	TD
glycerophosphodiester transmembrane transport	43	0.152466	-0.277311	0.277311	TD
cytochrome o ubiquinol oxidase activity	43	0.152466	-0.277311	0.277311	TD
glucan 1,4-alpha-glucosidase activity	43	0.152466	-0.277311	0.277311	TD
serine-type exopeptidase activity	82.5	0.152917	0.386555	0.386555	Baseline
lipopolysaccharide transmembrane transporter activity	82	0.154599	0.378151	0.378151	Baseline
kanamycin kinase activity	41	0.154678	-0.310924	0.310924	TD
plasma membrane respiratory chain complex I	41	0.154678	-0.310924	0.310924	TD
photosystem II oxygen evolving complex	42	0.155815	-0.294118	0.294118	TD
3-beta-hydroxy-delta5-steroid dehydrogenase activity	80	0.156127	0.344538	0.344538	Baseline
identical protein binding	82	0.157197	0.378151	0.378151	Baseline
microtubule	82	0.160512	0.378151	0.378151	Baseline
farnesyl-diphosphate farnesyltransferase activity	40.5	0.161516	-0.319328	0.319328	TD
ergosterol biosynthetic process	40.5	0.161516	-0.319328	0.319328	TD
squalene synthase activity	40.5	0.161516	-0.319328	0.319328	TD
glucose 1-dehydrogenase NAD(P) activity	82	0.161977	0.378151	0.378151	Baseline
mannuronate reductase activity	82	0.161977	0.378151	0.378151	Baseline
oxidoreductase activity, acting on NAD(P)H, nitrogenous group as acceptor	82	0.162251	0.378151	0.378151	Baseline
cellular response to oxidative stress	82	0.162251	0.378151	0.378151	Baseline
carboxylic ester hydrolase activity	82	0.162251	0.378151	0.378151	Baseline
maturation of SSU-rRNA from tricistronic rRNA transcript (SSU-rRNA, 5.8S rRNA, LSU-rRNA)	40	0.165331	-0.327731	0.327731	TD
phosphoenolpyruvate carboxykinase activity	79	0.165331	0.327731	0.327731	Baseline
nucleotide binding	37	0.16617	-0.378151	0.378151	TD
double-stranded DNA binding	37	0.16617	-0.378151	0.378151	TD
DNA-directed DNA polymerase activity	82	0.16617	0.378151	0.378151	Baseline
cystathionine gamma-synthase activity	37	0.16617	-0.378151	0.378151	TD
acetyl-CoA C-acetyltransferase activity	37	0.16617	-0.378151	0.378151	TD
argininosuccinate lyase activity	37	0.16617	-0.378151	0.378151	TD
biotin synthase activity	37	0.16617	-0.378151	0.378151	TD
carbamoyl-phosphate synthase (glutamine-hydrolyzing) activity	82	0.16617	0.378151	0.378151	Baseline
glutamate-5-semialdehyde dehydrogenase activity	37	0.16617	-0.378151	0.378151	TD
methylmalonate-semialdehyde dehydrogenase (acylating) activity	37	0.16617	-0.378151	0.378151	TD
protein serine/threonine kinase activity	37	0.16617	-0.378151	0.378151	TD
pyrroline-5-carboxylate reductase activity	37	0.16617	-0.378151	0.378151	TD
serine-tRNA ligase activity	37	0.16617	-0.378151	0.378151	TD
uroporphyrin-III C-methyltransferase activity	37	0.16617	-0.378151	0.378151	TD
isocitrate metabolic process	37	0.16617	-0.378151	0.378151	TD
translational termination	82	0.16617	0.378151	0.378151	Baseline
seryl-tRNA aminoacylation	37	0.16617	-0.378151	0.378151	TD
protein quality control for misfolded or incompletely synthesized proteins	37	0.16617	-0.378151	0.378151	TD
metalloexopeptidase activity	37	0.16617	-0.378151	0.378151	TD
glycerate dehydrogenase activity	37	0.16617	-0.378151	0.378151	TD
8-amino-7-oxononanoate synthase activity	82	0.16617	0.378151	0.378151	Baseline
cobinamide phosphate guanylyltransferase activity	37	0.16617	-0.378151	0.378151	TD
quinolinate synthetase A activity	37	0.16617	-0.378151	0.378151	TD
valine biosynthetic process	37	0.16617	-0.378151	0.378151	TD
nucleotide catabolic process	37	0.16617	-0.378151	0.378151	TD
beta-galactosidase complex	82	0.16617	0.378151	0.378151	Baseline
D-ribose transmembrane transporter activity	37	0.16617	-0.378151	0.378151	TD
site-specific DNA-methyltransferase (cytosine-N4-specific) activity	37	0.16617	-0.378151	0.378151	TD
formate metabolic process	37	0.16617	-0.378151	0.378151	TD
cellulose 1,4-beta-cellobiosidase activity	37	0.16617	-0.378151	0.378151	TD
oxidoreductase activity, acting on the aldehyde or oxo group of donors, iron-sulfur protein as acceptor	82	0.16617	0.378151	0.378151	Baseline
oxidoreductase activity, acting on a sulfur group of donors, NAD(P) as acceptor	82	0.16617	0.378151	0.378151	Baseline
transferase activity, transferring glycosyl groups	82	0.16617	0.378151	0.378151	Baseline
UDP-N-acetylglucosamine-undecaprenyl-phosphate N-acetylglucosaminephosphotransferase activity	82	0.16617	0.378151	0.378151	Baseline
alginic acid biosynthetic process	37	0.16617	-0.378151	0.378151	TD
proton-transporting ATP synthase complex, catalytic core F(1)	37	0.16617	-0.378151	0.378151	TD
positive regulation of transcription, DNA-templated	82	0.16617	0.378151	0.378151	Baseline
pyruvate, phosphate dikinase activity	37	0.16617	-0.378151	0.378151	TD
protein tetramerization	82	0.16617	0.378151	0.378151	Baseline
UDP-3-O-3-hydroxymyristoyl N-acetylglucosamine deacetylase activity	81.5	0.168825	0.369748	0.369748	Baseline
aspartyl esterase activity	81.5	0.172009	0.369748	0.369748	Baseline
NADP catabolic process	81	0.17422	0.361345	0.361345	Baseline
glycerol-3-phosphate transmembrane transporter activity	40	0.177881	-0.327731	0.327731	TD
3'-nucleotidase activity	42	0.178905	-0.294118	0.294118	TD
serine C-palmitoyltransferase activity	44	0.179776	-0.260504	0.260504	TD
citryl-CoA lyase activity	44	0.179776	-0.260504	0.260504	TD
trans-octaprenyltranstransferase activity	44	0.179776	-0.260504	0.260504	TD
all-trans-nonaprenyl-diphosphate synthase (geranyl-diphosphate specific) activity	44	0.179776	-0.260504	0.260504	TD
Ski complex	44	0.179776	-0.260504	0.260504	TD
purine nucleotide metabolic process	44	0.179776	-0.260504	0.260504	TD
GMP reductase complex	44	0.179776	-0.260504	0.260504	TD
keto-3-deoxy-D-manno-octulosonic acid biosynthetic process	44	0.179776	-0.260504	0.260504	TD
exo-alpha-(2->3)-sialidase activity	81	0.181342	0.361345	0.361345	Baseline
exo-alpha-(2->6)-sialidase activity	81	0.181342	0.361345	0.361345	Baseline
exo-alpha-(2->8)-sialidase activity	81	0.181342	0.361345	0.361345	Baseline
3-methyl-2-oxobutanoate dehydrogenase (2-methylpropanoyl-transferring) activity	43	0.181614	-0.277311	0.277311	TD
ethanolamine metabolic process	43	0.181614	-0.277311	0.277311	TD
5-dehydro-2-deoxyphosphogluconate aldolase activity	80	0.181647	0.344538	0.344538	Baseline
bacterial-type flagellum basal body, rod	38	0.181913	-0.361345	0.361345	TD
extracellular matrix	81	0.182199	0.361345	0.361345	Baseline
D-serine ammonia-lyase activity	80.5	0.184702	0.352941	0.352941	Baseline
(R)-2-hydroxyacid dehydrogenase activity	80.5	0.184702	0.352941	0.352941	Baseline
mitochondrial respiratory chain complex IV	47	0.184898	-0.210084	0.210084	TD
carbamoyl-phosphate synthase complex	47	0.184898	-0.210084	0.210084	TD
mitochondrial electron transport, cytochrome c to oxygen	47	0.184898	-0.210084	0.210084	TD
respiratory chain complex IV assembly	47	0.184898	-0.210084	0.210084	TD
oxidoreduction-driven active transmembrane transporter activity	47	0.184898	-0.210084	0.210084	TD
respiratory chain complex IV	47	0.184898	-0.210084	0.210084	TD
xanthan lyase activity	47	0.184898	-0.210084	0.210084	TD
hydrogen dehydrogenase (NADP+) activity	47	0.184898	-0.210084	0.210084	TD
carbamoyl phosphate biosynthetic process	47	0.184898	-0.210084	0.210084	TD
cellular response to amino acid stimulus	47	0.184898	-0.210084	0.210084	TD
ATPase activator activity	47	0.184898	-0.210084	0.210084	TD
amino acid transmembrane transport	47	0.184898	-0.210084	0.210084	TD
uracil catabolic process	47	0.184898	-0.210084	0.210084	TD
protein deglycosylation	47	0.184898	-0.210084	0.210084	TD
lipopolysaccharide metabolic process	47	0.184898	-0.210084	0.210084	TD
4-phytase activity	47	0.184898	-0.210084	0.210084	TD
alkanesulfonate monooxygenase activity	47	0.184898	-0.210084	0.210084	TD
quinoprotein glucose dehydrogenase activity	47	0.184898	-0.210084	0.210084	TD
lipopolysaccharide heptosyltransferase activity	47	0.184898	-0.210084	0.210084	TD
response to X-ray	47	0.184898	-0.210084	0.210084	TD
3-phenylpropionate catabolic process	47	0.184898	-0.210084	0.210084	TD
propionate catabolic process, 2-methylcitrate cycle	47	0.184898	-0.210084	0.210084	TD
molybdopterin synthase activity	47	0.184898	-0.210084	0.210084	TD
ethanolamine degradation polyhedral organelle	47	0.184898	-0.210084	0.210084	TD
protein-DNA complex	47	0.184898	-0.210084	0.210084	TD
3-hydroxypropionate dehydrogenase (NADP+) activity	47	0.184898	-0.210084	0.210084	TD
heme metabolic process	47	0.184898	-0.210084	0.210084	TD
response to drug	47	0.184898	-0.210084	0.210084	TD
succinate dehydrogenase complex	47	0.184898	-0.210084	0.210084	TD
calcium-dependent cysteine-type endopeptidase activity	47	0.184898	-0.210084	0.210084	TD
purine nucleobase catabolic process	47	0.184898	-0.210084	0.210084	TD
negative regulation of DNA replication	47	0.184898	-0.210084	0.210084	TD
toxin metabolic process	47	0.184898	-0.210084	0.210084	TD
arylsulfate sulfotransferase activity	47	0.184898	-0.210084	0.210084	TD
regulation of cytoplasmic translation in response to stress	47	0.184898	-0.210084	0.210084	TD
sodium:malonate symporter activity	47	0.184898	-0.210084	0.210084	TD
N-carbamoylsarcosine amidase activity	47	0.184898	-0.210084	0.210084	TD
N4-(beta-N-acetylglucosaminyl)-L-asparaginase activity	47	0.184898	-0.210084	0.210084	TD
demethylrebeccamycin--D-glucose O-methyltransferase activity	47	0.184898	-0.210084	0.210084	TD
negative regulation of cell population proliferation	47	0.184898	-0.210084	0.210084	TD
response to virus	47	0.184898	-0.210084	0.210084	TD
regulation of translational initiation by eIF2 alpha phosphorylation	47	0.184898	-0.210084	0.210084	TD
negative regulation of viral genome replication	47	0.184898	-0.210084	0.210084	TD
defense response to Gram-negative bacterium	47	0.184898	-0.210084	0.210084	TD
methylthioribulose 1-phosphate dehydratase activity	79.5	0.185677	0.336134	0.336134	Baseline
response to cadmium ion	73.5	0.186749	0.235294	0.235294	Baseline
flavonoid catabolic process	73.5	0.186749	0.235294	0.235294	Baseline
oligogalacturonide lyase activity	73.5	0.186749	0.235294	0.235294	Baseline
phloretin hydrolase activity	73.5	0.186749	0.235294	0.235294	Baseline
ferric-chelate reductase (NADPH) activity	73.5	0.186749	0.235294	0.235294	Baseline
endospore-forming forespore	73.5	0.186749	0.235294	0.235294	Baseline
Rab GTPase binding	73.5	0.186749	0.235294	0.235294	Baseline
acetoin dehydrogenase activity	73.5	0.186749	0.235294	0.235294	Baseline
tRNA wobble uridine modification	81	0.186921	0.361345	0.361345	Baseline
aminoacyl-tRNA editing activity	38	0.186921	-0.361345	0.361345	TD
3-methyl-2-oxobutanoate hydroxymethyltransferase activity	81	0.186921	0.361345	0.361345	Baseline
cysteine synthase activity	38	0.186921	-0.361345	0.361345	TD
threonine-type endopeptidase activity	81	0.186921	0.361345	0.361345	Baseline
histidinol-phosphate transaminase activity	38	0.186921	-0.361345	0.361345	TD
phosphoribosylamine-glycine ligase activity	38	0.186921	-0.361345	0.361345	TD
collagen trimer	38	0.186921	-0.361345	0.361345	TD
organic acid metabolic process	38	0.186921	-0.361345	0.361345	TD
regulation of carbohydrate metabolic process	38	0.186921	-0.361345	0.361345	TD
DNA-templated transcription, termination	81	0.186921	0.361345	0.361345	Baseline
phosphate ion transport	38	0.186921	-0.361345	0.361345	TD
cobalt ion transport	81	0.186921	0.361345	0.361345	Baseline
amino acid transport	81	0.186921	0.361345	0.361345	Baseline
O-methyltransferase activity	81	0.186921	0.361345	0.361345	Baseline
2-dehydropantoate 2-reductase activity	38	0.186921	-0.361345	0.361345	TD
gluconate 5-dehydrogenase activity	38	0.186921	-0.361345	0.361345	TD
glycerate kinase activity	38	0.186921	-0.361345	0.361345	TD
thiamine diphosphate biosynthetic process	38	0.186921	-0.361345	0.361345	TD
lactate transmembrane transporter activity	81	0.186921	0.361345	0.361345	Baseline
P-P-bond-hydrolysis-driven protein transmembrane transporter activity	38	0.186921	-0.361345	0.361345	TD
selenocysteine biosynthetic process	38	0.186921	-0.361345	0.361345	TD
hydrolase activity, acting on carbon-nitrogen (but not peptide) bonds, in cyclic amides	81	0.186921	0.361345	0.361345	Baseline
intramolecular lyase activity	38	0.186921	-0.361345	0.361345	TD
peptidyl-pyrromethane cofactor linkage	38	0.186921	-0.361345	0.361345	TD
D-gluconate metabolic process	81	0.186921	0.361345	0.361345	Baseline
transmembrane transporter activity	81	0.186921	0.361345	0.361345	Baseline
preQ1 synthase activity	81	0.186921	0.361345	0.361345	Baseline
beta-ketoacyl-acyl-carrier-protein synthase III activity	81	0.186921	0.361345	0.361345	Baseline
ribosomal small subunit biogenesis	38	0.186921	-0.361345	0.361345	TD
pyridoxal phosphate biosynthetic process	38	0.186921	-0.361345	0.361345	TD
AMP salvage	81	0.186921	0.361345	0.361345	Baseline
N-acylglucosamine-6-phosphate 2-epimerase activity	81	0.186921	0.361345	0.361345	Baseline
UDP-N-acetylmuramoyl-tripeptide-D-alanyl-D-alanine ligase activity	38	0.186921	-0.361345	0.361345	TD
diaminopimelate dehydrogenase activity	81	0.186921	0.361345	0.361345	Baseline
nicotinate dehydrogenase activity	38	0.186921	-0.361345	0.361345	TD
4 iron, 4 sulfur cluster binding	38	0.186921	-0.361345	0.361345	TD
ADP-dependent NAD(P)H-hydrate dehydratase activity	38	0.186921	-0.361345	0.361345	TD
sulfur compound metabolic process	40	0.188422	-0.327731	0.327731	TD
regulation of protein stability	79	0.188422	0.327731	0.327731	Baseline
acyl binding	41	0.188731	-0.310924	0.310924	TD
3'(2'),5'-bisphosphate nucleotidase activity	41	0.188731	-0.310924	0.310924	TD
oxidoreductase activity, acting on the CH-NH group of donors	41	0.188731	-0.310924	0.310924	TD
D-galacturonate catabolic process	41	0.188731	-0.310924	0.310924	TD
2-oxoglutarate synthase activity	78	0.188731	0.310924	0.310924	Baseline
molybdenum-iron nitrogenase complex	41	0.188731	-0.310924	0.310924	TD
single-stranded RNA binding	80.5	0.189523	0.352941	0.352941	Baseline
polynucleotide adenylyltransferase activity	78.5	0.18957	0.319328	0.319328	Baseline
fimbrial usher porin activity	78.5	0.18957	0.319328	0.319328	Baseline
lipoteichoic acid biosynthetic process	80.5	0.191958	0.352941	0.352941	Baseline
actin filament binding	80	0.191993	0.344538	0.344538	Baseline
type III site-specific deoxyribonuclease activity	79	0.19721	0.327731	0.327731	Baseline
oxidoreductase activity, acting on paired donors, with incorporation or reduction of molecular oxygen	80	0.198455	0.344538	0.344538	Baseline
virion assembly	80	0.198455	0.344538	0.344538	Baseline
cell communication	41	0.201816	-0.310924	0.310924	TD
dimethylargininase activity	41	0.201816	-0.310924	0.310924	TD
oleoyl-acyl-carrier-protein hydrolase activity	80	0.202036	0.344538	0.344538	Baseline
catabolic process	80	0.202036	0.344538	0.344538	Baseline
myristoyl-acyl-carrier-protein hydrolase activity	80	0.202036	0.344538	0.344538	Baseline
palmitoyl-acyl-carrier-protein hydrolase activity	80	0.202036	0.344538	0.344538	Baseline
protein C-terminal leucine carboxyl O-methyltransferase activity	79.5	0.207052	0.336134	0.336134	Baseline
D-amino acid metabolic process	79.5	0.207052	0.336134	0.336134	Baseline
erythronolide synthase activity	79.5	0.207052	0.336134	0.336134	Baseline
intracellular membrane-bounded organelle	40.5	0.209259	-0.319328	0.319328	TD
transition metal ion transport	39	0.209411	-0.344538	0.344538	TD
xanthine phosphoribosyltransferase activity	39	0.209411	-0.344538	0.344538	TD
translation release factor activity	80	0.209411	0.344538	0.344538	Baseline
N2-acetyl-L-ornithine:2-oxoglutarate 5-aminotransferase activity	39	0.209411	-0.344538	0.344538	TD
adenosylhomocysteinase activity	80	0.209411	0.344538	0.344538	Baseline
asparagine synthase (glutamine-hydrolyzing) activity	39	0.209411	-0.344538	0.344538	TD
cystathionine beta-lyase activity	39	0.209411	-0.344538	0.344538	TD
acyl-carrier-protein S-malonyltransferase activity	39	0.209411	-0.344538	0.344538	TD
glucose-6-phosphate dehydrogenase activity	80	0.209411	0.344538	0.344538	Baseline
nuclease activity	80	0.209411	0.344538	0.344538	Baseline
beta-glucuronidase activity	39	0.209411	-0.344538	0.344538	TD
glutamine-tRNA ligase activity	80	0.209411	0.344538	0.344538	Baseline
glycyl-tRNA aminoacylation	39	0.209411	-0.344538	0.344538	TD
lipid metabolic process	80	0.209411	0.344538	0.344538	Baseline
porphyrin-containing compound biosynthetic process	39	0.209411	-0.344538	0.344538	TD
spermidine biosynthetic process	80	0.209411	0.344538	0.344538	Baseline
2-C-methyl-D-erythritol 2,4-cyclodiphosphate synthase activity	39	0.209411	-0.344538	0.344538	TD
UDP-N-acetylmuramate-L-alanine ligase activity	39	0.209411	-0.344538	0.344538	TD
agmatinase activity	39	0.209411	-0.344538	0.344538	TD
deoxyribonuclease IV (phage-T4-induced) activity	80	0.209411	0.344538	0.344538	Baseline
phosphate acetyltransferase activity	39	0.209411	-0.344538	0.344538	TD
tagaturonate reductase activity	80	0.209411	0.344538	0.344538	Baseline
nucleoside triphosphate catabolic process	39	0.209411	-0.344538	0.344538	TD
potassium:chloride symporter activity	39	0.209411	-0.344538	0.344538	TD
coenzyme A biosynthetic process	39	0.209411	-0.344538	0.344538	TD
terpenoid biosynthetic process	39	0.209411	-0.344538	0.344538	TD
oxidoreductase activity, acting on iron-sulfur proteins as donors	39	0.209411	-0.344538	0.344538	TD
transferase activity, transferring alkyl or aryl (other than methyl) groups	39	0.209411	-0.344538	0.344538	TD
hydrolase activity, acting on glycosyl bonds	39	0.209411	-0.344538	0.344538	TD
oxidoreductase activity, acting on the aldehyde or oxo group of donors	80	0.209411	0.344538	0.344538	Baseline
establishment of competence for transformation	39	0.209411	-0.344538	0.344538	TD
glycine reductase activity	39	0.209411	-0.344538	0.344538	TD
serine 3-dehydrogenase activity	80	0.209411	0.344538	0.344538	Baseline
XMP salvage	39	0.209411	-0.344538	0.344538	TD
3'-tRNA processing endoribonuclease activity	39	0.209411	-0.344538	0.344538	TD
cellobiose epimerase activity	80	0.209411	0.344538	0.344538	Baseline
large ribosomal subunit rRNA binding	39	0.209411	-0.344538	0.344538	TD
cytidylyltransferase activity	39	0.209411	-0.344538	0.344538	TD
nitrogen compound transport	39	0.209411	-0.344538	0.344538	TD
nucleotide phosphatase activity, acting on free nucleotides	39	0.209411	-0.344538	0.344538	TD
guanine catabolic process	44	0.210455	-0.260504	0.260504	TD
tRNA 3'-terminal Cellular_ComponentsA addition	42.5	0.211797	-0.285714	0.285714	TD
D-aspartate ligase activity	42.5	0.211797	-0.285714	0.285714	TD
pyruvate, water dikinase activity	79.5	0.212034	0.336134	0.336134	Baseline
dimethyl sulfoxide reductase activity	41	0.212751	-0.310924	0.310924	TD
CDP-glucose 4,6-dehydratase activity	77.5	0.214628	0.302521	0.302521	Baseline
muconate cycloisomerase activity	79	0.215171	0.327731	0.327731	Baseline
2-(R)-hydroxypropyl-CoM dehydrogenase activity	79	0.215171	0.327731	0.327731	Baseline
5'-deoxynucleotidase activity	39.5	0.215446	-0.336134	0.336134	TD
glutamate dehydrogenase (NADP+) activity	79	0.221833	0.327731	0.327731	Baseline
adenosylmethionine decarboxylase activity	79	0.223988	0.327731	0.327731	Baseline
glutathione peroxidase activity	79	0.225518	0.327731	0.327731	Baseline
copper ion transport	79	0.225518	0.327731	0.327731	Baseline
magnesium chelatase activity	79	0.225518	0.327731	0.327731	Baseline
antibiotic biosynthetic process	79	0.225518	0.327731	0.327731	Baseline
4-aminobutyrate transaminase activity	76	0.225971	0.277311	0.277311	Baseline
gamma-aminobutyric acid metabolic process	76	0.225971	0.277311	0.277311	Baseline
glutamate decarboxylase activity	79	0.227142	0.327731	0.327731	Baseline
glutamate metabolic process	79	0.227142	0.327731	0.327731	Baseline
fatty-acyl-CoA synthase activity	79	0.227445	0.327731	0.327731	Baseline
lytic transglycosylase activity	79	0.227445	0.327731	0.327731	Baseline
bacterial-type flagellum organization	40	0.227445	-0.327731	0.327731	TD
transcription-coupled nucleotide-excision repair, DNA damage recognition	40	0.233704	-0.327731	0.327731	TD
division septum assembly	40	0.233704	-0.327731	0.327731	TD
single-stranded DNA binding	79	0.233704	0.327731	0.327731	Baseline
adenylate cyclase activity	79	0.233704	0.327731	0.327731	Baseline
serine-type endopeptidase activity	40	0.233704	-0.327731	0.327731	TD
methenyltetrahydrofolate cyclohydrolase activity	40	0.233704	-0.327731	0.327731	TD
phosphoribosyl-ATP diphosphatase activity	79	0.233704	0.327731	0.327731	Baseline
phosphoribosylanthranilate isomerase activity	40	0.233704	-0.327731	0.327731	TD
structural molecule activity	40	0.233704	-0.327731	0.327731	TD
carbohydrate:proton symporter activity	40	0.233704	-0.327731	0.327731	TD
fructose 6-phosphate metabolic process	40	0.233704	-0.327731	0.327731	TD
N-acetylglucosamine metabolic process	79	0.233704	0.327731	0.327731	Baseline
plasmid maintenance	79	0.233704	0.327731	0.327731	Baseline
nitrogen compound metabolic process	79	0.233704	0.327731	0.327731	Baseline
3,4-dihydroxy-2-butanone-4-phosphate synthase activity	79	0.233704	0.327731	0.327731	Baseline
chloramphenicol O-acetyltransferase activity	79	0.233704	0.327731	0.327731	Baseline
diaminopropionate ammonia-lyase activity	40	0.233704	-0.327731	0.327731	TD
glucose-1-phosphate thymidylyltransferase activity	79	0.233704	0.327731	0.327731	Baseline
xylose isomerase activity	79	0.233704	0.327731	0.327731	Baseline
lipopolysaccharide biosynthetic process	79	0.233704	0.327731	0.327731	Baseline
quorum sensing	40	0.233704	-0.327731	0.327731	TD
ATPase-coupled vitamin B12 transmembrane transporter activity	40	0.233704	-0.327731	0.327731	TD
toxic substance binding	40	0.233704	-0.327731	0.327731	TD
carbon utilization	40	0.233704	-0.327731	0.327731	TD
lactate oxidation	79	0.233704	0.327731	0.327731	Baseline
protein-N(PI)-phosphohistidine-fructose phosphotransferase system transporter activity	40	0.233704	-0.327731	0.327731	TD
molybdopterin cofactor biosynthetic process	40	0.233704	-0.327731	0.327731	TD
ribosome biogenesis	40	0.233704	-0.327731	0.327731	TD
polyphosphate:AMP phosphotransferase activity	40	0.233704	-0.327731	0.327731	TD
S-adenosylhomocysteine deaminase activity	79	0.233704	0.327731	0.327731	Baseline
protein maturation	40	0.233704	-0.327731	0.327731	TD
D-glucosamine PTS permease activity	40	0.233704	-0.327731	0.327731	TD
lysine 2,3-aminomutase activity	41.5	0.234938	-0.302521	0.302521	TD
UDP-3-O-(R-3-hydroxymyristoyl)-glucosamine N-acyltransferase activity	44	0.235622	-0.260504	0.260504	TD
1,2-diacylglycerol 3-glucosyltransferase activity	75	0.235622	0.260504	0.260504	Baseline
DNA ligation involved in DNA repair	75	0.235622	0.260504	0.260504	Baseline
methylamine metabolic process	75	0.235622	0.260504	0.260504	Baseline
single-strand selective uracil DNA N-glycosylase activity	75	0.235622	0.260504	0.260504	Baseline
N-acyltransferase activity	78.5	0.236416	0.319328	0.319328	Baseline
coenzyme A metabolic process	77	0.23927	0.294118	0.294118	Baseline
2-dehydro-3-deoxygalactonokinase activity	42	0.23927	-0.294118	0.294118	TD
opine dehydrogenase activity	42	0.23927	-0.294118	0.294118	TD
polyphosphate-glucose phosphotransferase activity	78.5	0.239913	0.319328	0.319328	Baseline
nitrate assimilation	41	0.240301	-0.310924	0.310924	TD
negative regulation of purine nucleobase metabolic process	78	0.240301	0.310924	0.310924	Baseline
2-dehydro-3-deoxy-D-gluconate 5-dehydrogenase activity	42.5	0.241989	-0.285714	0.285714	TD
mannitol 2-dehydrogenase activity	45	0.242474	-0.243697	0.243697	TD
methylmalonyl-CoA decarboxylase activity	43	0.242684	-0.277311	0.277311	TD
sarcosine oxidase activity	76	0.242684	0.277311	0.277311	Baseline
bis(5'-nucleosyl)-tetraphosphatase (symmetrical) activity	78	0.247121	0.310924	0.310924	Baseline
tetraacyldisaccharide 4'-kinase activity	78	0.247121	0.310924	0.310924	Baseline
3 iron, 4 sulfur cluster binding	42	0.248582	-0.294118	0.294118	TD
organic phosphonate transport	77	0.248582	0.294118	0.294118	Baseline
glutamate-tRNA(Gln) ligase activity	77	0.248582	0.294118	0.294118	Baseline
phosphoenolpyruvate mutase activity	42	0.248582	-0.294118	0.294118	TD
benzoate transmembrane transporter activity	77.5	0.24867	0.302521	0.302521	Baseline
protein-macromolecule adaptor activity	78	0.249324	0.310924	0.310924	Baseline
phosphatidylglycerophosphatase activity	78	0.250888	0.310924	0.310924	Baseline
phosphatidylinositol diacylglycerol-lyase activity	78	0.252545	0.310924	0.310924	Baseline
threonine aldolase activity	41	0.252545	-0.310924	0.310924	TD
proteasome binding	78	0.252545	0.310924	0.310924	Baseline
organic substance metabolic process	78	0.252545	0.310924	0.310924	Baseline
nucleoside transmembrane transporter activity	78	0.252855	0.310924	0.310924	Baseline
histamine N-methyltransferase activity	77	0.25623	0.294118	0.294118	Baseline
membrane coat	75	0.256322	0.260504	0.260504	Baseline
nucleic acid binding	78	0.259812	0.310924	0.310924	Baseline
translation initiation factor activity	78	0.259812	0.310924	0.310924	Baseline
DNA topoisomerase type I (single strand cut, ATP-independent) activity	41	0.259812	-0.310924	0.310924	TD
L-seryl-tRNASec selenium transferase activity	41	0.259812	-0.310924	0.310924	TD
cytidylate kinase activity	41	0.259812	-0.310924	0.310924	TD
alpha-amylase activity	41	0.259812	-0.310924	0.310924	TD
phosphatidylserine decarboxylase activity	78	0.259812	0.310924	0.310924	Baseline
phosphogluconate dehydrogenase (decarboxylating) activity	78	0.259812	0.310924	0.310924	Baseline
N-acetylmannosamine metabolic process	78	0.259812	0.310924	0.310924	Baseline
glycerol metabolic process	41	0.259812	-0.310924	0.310924	TD
regulation of DNA repair	78	0.259812	0.310924	0.310924	Baseline
DNA recombination	78	0.259812	0.310924	0.310924	Baseline
signal peptide processing	41	0.259812	-0.310924	0.310924	TD
chromosome segregation	41	0.259812	-0.310924	0.310924	TD
queuosine biosynthetic process	78	0.259812	0.310924	0.310924	Baseline
UDP-N-acetylmuramoylalanine-D-glutamate ligase activity	78	0.259812	0.310924	0.310924	Baseline
tyrosine-based site-specific recombinase activity	78	0.259812	0.310924	0.310924	Baseline
leucine biosynthetic process	78	0.259812	0.310924	0.310924	Baseline
four-way junction helicase activity	78	0.259812	0.310924	0.310924	Baseline
pseudouridine synthase activity	41	0.259812	-0.310924	0.310924	TD
nickel cation transport	41	0.259812	-0.310924	0.310924	TD
transferase activity, transferring amino-acyl groups	41	0.259812	-0.310924	0.310924	TD
transferase activity, transferring pentosyl groups	78	0.259812	0.310924	0.310924	Baseline
antibiotic catabolic process	78	0.259812	0.310924	0.310924	Baseline
peptidyl-L-beta-methylthioaspartic acid biosynthetic process from peptidyl-aspartic acid	41	0.259812	-0.310924	0.310924	TD
endo-1,4-beta-xylanase activity	78	0.259812	0.310924	0.310924	Baseline
regulation of division septum assembly	41	0.259812	-0.310924	0.310924	TD
proton-transporting two-sector ATPase complex, proton-transporting domain	41	0.259812	-0.310924	0.310924	TD
single-species biofilm formation	41	0.259812	-0.310924	0.310924	TD
precorrin-6Y C5,15-methyltransferase (decarboxylating) activity	41	0.259812	-0.310924	0.310924	TD
tRNA (guanine(37)-N(1))-methyltransferase activity	41	0.259812	-0.310924	0.310924	TD
double-strand break repair via nonhomologous end joining	47.5	0.260731	-0.201681	0.201681	TD
response to arsenic-containing substance	47.5	0.260731	-0.201681	0.201681	TD
2-alkenal reductase NAD(P)+ activity	77	0.26743	0.294118	0.294118	Baseline
phosphatidylinositol binding	42	0.26743	-0.294118	0.294118	TD
extrinsic component of membrane	45	0.268322	-0.243697	0.243697	TD
vacuolar proton-transporting V-type ATPase complex assembly	74	0.268322	0.243697	0.243697	Baseline
CDP-diacylglycerol diphosphatase activity	70	0.269224	0.176471	0.176471	Baseline
non-membrane spanning protein tyrosine phosphatase activity	70	0.269224	0.176471	0.176471	Baseline
regulation of phosphorylation	70	0.269224	0.176471	0.176471	Baseline
2-aminomuconate deaminase activity	70	0.269224	0.176471	0.176471	Baseline
integrin-mediated signaling pathway	44.5	0.272514	-0.252101	0.252101	TD
heptose 7-phosphate kinase activity	44	0.273391	-0.260504	0.260504	TD
heptose-1-phosphate adenylyltransferase activity	44	0.273391	-0.260504	0.260504	TD
ectoine biosynthetic process	75	0.273391	0.260504	0.260504	Baseline
thioredoxin peroxidase activity	77	0.274362	0.294118	0.294118	Baseline
maltose alpha-D-glucosyltransferase activity	77	0.276598	0.294118	0.294118	Baseline
beta-L-arabinofuranosidase activity	42	0.276598	-0.294118	0.294118	TD
organic phosphonate metabolic process	76	0.277511	0.277311	0.277311	Baseline
nitrate reductase (cytochrome) activity	46	0.277772	-0.226891	0.226891	TD
D-aspartate oxidase activity	77	0.278184	0.294118	0.294118	Baseline
S-formylglutathione hydrolase activity	77	0.278184	0.294118	0.294118	Baseline
alkylbase DNA N-glycosylase activity	42	0.279865	-0.294118	0.294118	TD
dextransucrase activity	77	0.279865	0.294118	0.294118	Baseline
dihydropyrimidine dehydrogenase (NADP+) activity	42	0.280179	-0.294118	0.294118	TD
cyclohexadienyl dehydrogenase activity	42	0.280179	-0.294118	0.294118	TD
conjugation	43	0.285267	-0.277311	0.277311	TD
alpha-N-acetylgalactosaminidase activity	76.5	0.285699	0.285714	0.285714	Baseline
nicotinamide nucleotide biosynthetic process	76.5	0.285699	0.285714	0.285714	Baseline
bacterial-type cis-regulatory region sequence-specific DNA binding	42	0.287781	-0.294118	0.294118	TD
NAD+ synthase (glutamine-hydrolyzing) activity	42	0.287781	-0.294118	0.294118	TD
NAD(P)H dehydrogenase (quinone) activity	77	0.287781	0.294118	0.294118	Baseline
adenylosuccinate synthase activity	77	0.287781	0.294118	0.294118	Baseline
glutamate 5-kinase activity	77	0.287781	0.294118	0.294118	Baseline
L-lactate dehydrogenase activity	42	0.287781	-0.294118	0.294118	TD
protein kinase activity	42	0.287781	-0.294118	0.294118	TD
protein histidine kinase activity	42	0.287781	-0.294118	0.294118	TD
thiosulfate sulfurtransferase activity	42	0.287781	-0.294118	0.294118	TD
transporter activity	77	0.287781	0.294118	0.294118	Baseline
manganese ion transmembrane transporter activity	42	0.287781	-0.294118	0.294118	TD
DNA dealkylation involved in DNA repair	77	0.287781	0.294118	0.294118	Baseline
DNA packaging	42	0.287781	-0.294118	0.294118	TD
obsolete protein transporter activity	77	0.287781	0.294118	0.294118	Baseline
D-alanine-D-alanine ligase activity	77	0.287781	0.294118	0.294118	Baseline
L-threonine 3-dehydrogenase activity	42	0.287781	-0.294118	0.294118	TD
formate C-acetyltransferase activity	42	0.287781	-0.294118	0.294118	TD
oxaloacetate decarboxylase activity	77	0.287781	0.294118	0.294118	Baseline
succinyldiaminopimelate transaminase activity	77	0.287781	0.294118	0.294118	Baseline
undecaprenol kinase activity	42	0.287781	-0.294118	0.294118	TD
nucleotide-sugar metabolic process	77	0.287781	0.294118	0.294118	Baseline
peptidoglycan catabolic process	77	0.287781	0.294118	0.294118	Baseline
SOS response	42	0.287781	-0.294118	0.294118	TD
nitronate monooxygenase activity	42	0.287781	-0.294118	0.294118	TD
L-methionine salvage from methylthioadenosine	42	0.287781	-0.294118	0.294118	TD
carboxylic acid metabolic process	77	0.287781	0.294118	0.294118	Baseline
lipid glycosylation	42	0.287781	-0.294118	0.294118	TD
dinitrosyl-iron complex binding	77	0.287781	0.294118	0.294118	Baseline
cell wall macromolecule biosynthetic process	42	0.287781	-0.294118	0.294118	TD
cellular carbohydrate metabolic process	77	0.287781	0.294118	0.294118	Baseline
bacterial-type flagellum assembly	42	0.287781	-0.294118	0.294118	TD
metal ion binding	42	0.287781	-0.294118	0.294118	TD
oleate hydratase activity	42	0.287781	-0.294118	0.294118	TD
molybdenum cofactor guanylyltransferase activity	42	0.287781	-0.294118	0.294118	TD
small ribosomal subunit rRNA binding	77	0.287781	0.294118	0.294118	Baseline
trans-translation	42	0.287781	-0.294118	0.294118	TD
carbohydrate derivative binding	42	0.287781	-0.294118	0.294118	TD
DNA-deoxyinosine glycosylase activity	76	0.296594	0.277311	0.277311	Baseline
acetoin biosynthetic process	76	0.296594	0.277311	0.277311	Baseline
acetolactate decarboxylase activity	76	0.296594	0.277311	0.277311	Baseline
oxalate catabolic process	76	0.296594	0.277311	0.277311	Baseline
protein demethylation	75	0.299101	0.260504	0.260504	Baseline
S-methyl-5-thioadenosine phosphorylase activity	44	0.299101	-0.260504	0.260504	TD
protein deamination	75	0.299101	0.260504	0.260504	Baseline
hydroxypyruvate reductase activity	76	0.303586	0.277311	0.277311	Baseline
glycine amidinotransferase activity	74.5	0.303852	0.252101	0.252101	Baseline
putrescine:ornithine antiporter activity	74.5	0.303852	0.252101	0.252101	Baseline
diamine transaminase activity	73	0.304012	0.226891	0.226891	Baseline
carbon-oxygen lyase activity, acting on polysaccharides	48.5	0.304483	-0.184874	0.184874	TD
aldehyde ferredoxin oxidoreductase activity	48.5	0.304483	-0.184874	0.184874	TD
bacterial-type flagellum-dependent swarming motility	48.5	0.304483	-0.184874	0.184874	TD
acetyl-CoA biosynthetic process from acetate	48.5	0.304483	-0.184874	0.184874	TD
pilus organization	74	0.306654	0.243697	0.243697	Baseline
galactosylceramidase activity	76	0.307435	0.277311	0.277311	Baseline
galactosylceramide catabolic process	76	0.307435	0.277311	0.277311	Baseline
isoamylase activity	76	0.308494	0.277311	0.277311	Baseline
potassium channel activity	75	0.30865	0.260504	0.260504	Baseline
inositol-3-phosphate synthase activity	76	0.309127	0.277311	0.277311	Baseline
glucose-6-phosphate 1-epimerase activity	43	0.309442	-0.277311	0.277311	TD
molybdopterin molybdotransferase activity	43	0.309442	-0.277311	0.277311	TD
cytochrome-c peroxidase activity	47	0.316415	-0.210084	0.210084	TD
beta-1,4-mannosylglycoprotein 4-beta-N-acetylglucosaminyltransferase activity	47	0.316415	-0.210084	0.210084	TD
nicotinamide-nucleotide adenylyltransferase activity	47	0.316415	-0.210084	0.210084	TD
diaminobutyrate-2-oxoglutarate transaminase activity	75	0.316452	0.260504	0.260504	Baseline
mevalonate kinase activity	75	0.316452	0.260504	0.260504	Baseline
tRNA threonylcarbamoyladenosine modification	43	0.317592	-0.277311	0.277311	TD
3-dehydroquinate synthase activity	43	0.317592	-0.277311	0.277311	TD
5-methyltetrahydropteroyltriglutamate-homocysteine S-methyltransferase activity	43	0.317592	-0.277311	0.277311	TD
UDP-glucose 4-epimerase activity	43	0.317592	-0.277311	0.277311	TD
arylformamidase activity	43	0.317592	-0.277311	0.277311	TD
catalase activity	76	0.317592	0.277311	0.277311	Baseline
ferroxidase activity	76	0.317592	0.277311	0.277311	Baseline
hypoxanthine phosphoribosyltransferase activity	43	0.317592	-0.277311	0.277311	TD
isocitrate dehydrogenase (NADP+) activity	43	0.317592	-0.277311	0.277311	TD
methylenetetrahydrofolate reductase (NAD(P)H) activity	43	0.317592	-0.277311	0.277311	TD
phosphoenolpyruvate carboxykinase (GTP) activity	76	0.317592	0.277311	0.277311	Baseline
threonine synthase activity	43	0.317592	-0.277311	0.277311	TD
tyrosine-tRNA ligase activity	76	0.317592	0.277311	0.277311	Baseline
urea carboxylase activity	43	0.317592	-0.277311	0.277311	TD
voltage-gated potassium channel activity	76	0.317592	0.277311	0.277311	Baseline
pyrimidine nucleotide biosynthetic process	43	0.317592	-0.277311	0.277311	TD
dUMP biosynthetic process	76	0.317592	0.277311	0.277311	Baseline
dTTP biosynthetic process	43	0.317592	-0.277311	0.277311	TD
DNA replication	76	0.317592	0.277311	0.277311	Baseline
intracellular protein transport	43	0.317592	-0.277311	0.277311	TD
voltage-gated potassium channel complex	76	0.317592	0.277311	0.277311	Baseline
transaminase activity	76	0.317592	0.277311	0.277311	Baseline
L-ribulose-phosphate 4-epimerase activity	43	0.317592	-0.277311	0.277311	TD
succinyl-diaminopimelate desuccinylase activity	43	0.317592	-0.277311	0.277311	TD
thiamine biosynthetic process	43	0.317592	-0.277311	0.277311	TD
proton transmembrane transporter activity	43	0.317592	-0.277311	0.277311	TD
phosphotransferase activity, nitrogenous group as acceptor	43	0.317592	-0.277311	0.277311	TD
hydrolase activity, acting on carbon-nitrogen (but not peptide) bonds	43	0.317592	-0.277311	0.277311	TD
carbon-carbon lyase activity	76	0.317592	0.277311	0.277311	Baseline
removal of superoxide radicals	43	0.317592	-0.277311	0.277311	TD
tryptophan catabolic process to kynurenine	43	0.317592	-0.277311	0.277311	TD
cobalamin binding	76	0.317592	0.277311	0.277311	Baseline
beta-ketoacyl-acyl-carrier-protein synthase II activity	43	0.317592	-0.277311	0.277311	TD
ribonuclease D activity	76	0.317592	0.277311	0.277311	Baseline
purine nucleoside metabolic process	43	0.317592	-0.277311	0.277311	TD
N-acetylglucosaminyldiphosphoundecaprenol N-acetyl-beta-D-mannosaminyltransferase activity	76	0.317592	0.277311	0.277311	Baseline
N-acetylgalactosamine-6-phosphate deacetylase activity	43	0.317592	-0.277311	0.277311	TD
creatininase activity	43	0.317592	-0.277311	0.277311	TD
4-(cytidine 5'-diphospho)-2-C-methyl-D-erythritol kinase activity	43	0.317592	-0.277311	0.277311	TD
superoxide reductase activity	43	0.317592	-0.277311	0.277311	TD
CTP:tRNA cytidylyltransferase activity	43	0.317592	-0.277311	0.277311	TD
CTP:3'-cytidine-tRNA cytidylyltransferase activity	43	0.317592	-0.277311	0.277311	TD
ATP:3'-cytidine-cytidine-tRNA adenylyltransferase activity	43	0.317592	-0.277311	0.277311	TD
hydrogen sulfide biosynthetic process	43	0.317592	-0.277311	0.277311	TD
cytosolic dipeptidase activity	43	0.317592	-0.277311	0.277311	TD
alanylglutamate dipeptidase activity	43	0.317592	-0.277311	0.277311	TD
carbohydrate derivative biosynthetic process	43	0.317592	-0.277311	0.277311	TD
UDP-3-O-acyl-N-acetylglucosamine deacetylase activity	75.5	0.321201	0.268908	0.268908	Baseline
defense response to Gram-positive bacterium	75	0.322767	0.260504	0.260504	Baseline
phosphatidylinositol phospholipase C activity	75.5	0.323857	0.268908	0.268908	Baseline
ubiquitin-like protein transferase activity	75.5	0.324806	0.268908	0.268908	Baseline
tRNA (m1A) methyltransferase complex	75.5	0.324806	0.268908	0.268908	Baseline
phosphatidylethanolamine biosynthetic process	44.5	0.325055	-0.252101	0.252101	TD
glyoxylate cycle	75	0.327812	0.260504	0.260504	Baseline
farnesyltranstransferase activity	75	0.334808	0.260504	0.260504	Baseline
protein-ribulosamine 3-kinase activity	75	0.334808	0.260504	0.260504	Baseline
collagen binding	75	0.338653	0.260504	0.260504	Baseline
response to metal ion	75	0.338653	0.260504	0.260504	Baseline
lipoyl(octanoyl) transferase activity	75	0.338653	0.260504	0.260504	Baseline
2-aminoadipate transaminase activity	75	0.338653	0.260504	0.260504	Baseline
octanoyl transferase activity (acting on glycine-cleavage complex H protein)	75	0.338653	0.260504	0.260504	Baseline
regulation of glutamine family amino acid metabolic process	75	0.340342	0.260504	0.260504	Baseline
kojibiose phosphorylase activity	44	0.340342	-0.260504	0.260504	TD
glutamine synthetase-adenylyl-L-tyrosine phosphorylase	75	0.340342	0.260504	0.260504	Baseline
toxin activity	75	0.340342	0.260504	0.260504	Baseline
alpha,alpha-trehalase activity	75	0.340657	0.260504	0.260504	Baseline
oxalate decarboxylase activity	44	0.340657	-0.260504	0.260504	TD
4-aminobutyrate:2-oxoglutarate transaminase activity	45	0.342017	-0.243697	0.243697	TD
triphosphatase activity	46	0.342494	-0.226891	0.226891	TD
GTP cyclohydrolase activity	73	0.342494	0.226891	0.226891	Baseline
structural constituent of ribosome	75	0.349265	0.260504	0.260504	Baseline
1-(5-phosphoribosyl)-5-(5-phosphoribosylamino)methylideneaminoimidazole-4-carboxamide isomerase activity	44	0.349265	-0.260504	0.260504	TD
UDP-glucose 6-dehydrogenase activity	75	0.349265	0.260504	0.260504	Baseline
aspartate carbamoyltransferase activity	75	0.349265	0.260504	0.260504	Baseline
glucosamine-6-phosphate deaminase activity	75	0.349265	0.260504	0.260504	Baseline
guanylate kinase activity	44	0.349265	-0.260504	0.260504	TD
[truncated: 2,044 more rows]

## Sheet: Correlation_BaselinesVsFollUP
feature	feature	Symptom	correlation	p_value	FDR	featureType	p_label	p_value_feature	p_value_symptom	sig_feature	sig_symptom	mean_delta	mean_delta_score	direction
1.2.5.1:Pyruvate dehydrogenase (quinone)	1-deoxy-D-xylulose-5-phosphate reductoisomerase activity	# of days 1 or 2	-0.985611	0.000309086	0.344492	GO	***	0.03125	0.712702	TRUE	FALSE	-0.358883	0.416667	Negative
1.4.1.2:Glutamate dehydrogenase	1.1.1.1:Alcohol dehydrogenase	Eye Contact	-0.985611	0.000309086	0.344492	EC	***	0.4375	0.36131	FALSE	FALSE	-0.440989	-1	Negative
1.8.1.2:Assimilatory sulfite reductase (NADPH)	1.1.1.23:Histidinol dehydrogenase	# of days 1 or 2	-0.985611	0.000309086	0.344492	EC	***	0.03125	0.712702	TRUE	FALSE	-0.398953	0.416667	Negative
10-formyltetrahydrofolate biosynthetic process	1.1.1.69:Gluconate 5-dehydrogenase	incomplete evacuation	-0.985611	0.000309086	0.344492	EC	***	0.84375	0.0579073	FALSE	FALSE	-0.138977	-2.83333	Negative
2.1.2.5:Glutamate formimidoyltransferase	1.17.7.3:(E)-4-hydroxy-3-methylbut-2-enyl-diphosphate synthase (flavodoxin)	Eye Contact	-0.985611	0.000309086	0.344492	EC	***	0.0625	0.36131	FALSE	FALSE	-0.331259	-1	Negative
4.1.1.48:Indole-3-glycerol-phosphate synthase	1.18.1.1:Rubredoxin--NAD(+) reductase	Eye Contact	-0.985611	0.000309086	0.344492	EC	***	0.84375	0.36131	FALSE	FALSE	0.415589	-1	Negative
4.1.2.5:L-threonine aldolase	1.18.1.3:Ferredoxin--NAD(+) reductase	# of days 1 or 2	-0.985611	0.000309086	0.344492	EC	***	0.3125	0.712702	FALSE	FALSE	-0.555726	0.416667	Negative
4.1.2.5:L-threonine aldolase	1.2.1.70:Glutamyl-tRNA reductase	Sleep	-0.985611	0.000309086	0.344492	EC	***	0.4375	0.169564	FALSE	FALSE	-0.191829	-1.5	Negative
4.1.2.5:L-threonine aldolase	1.2.5.1:Pyruvate dehydrogenase (quinone)	# of days 1 or 2	-0.985611	0.000309086	0.344492	EC	***	0.15625	0.712702	FALSE	FALSE	1.43574	0.416667	Negative
4.1.2.5:L-threonine aldolase	1.3.1.44:Trans-2-enoyl-CoA reductase (NAD(+))	Sleep	-0.985611	0.000309086	0.344492	EC	***	0.84375	0.169564	FALSE	FALSE	0.503725	-1.5	Negative
4.2.1.20:Tryptophan synthase	1.3.1.84:Acrylyl-CoA reductase (NADPH)	gas	0.985611	0.000309086	0.344492	EC	***	1	0.0579073	FALSE	FALSE	0.359338	-2.33333	Positive
7.2.1.1:NADH:ubiquinone reductase (Na(+)-transporting)	1.4.1.2:Glutamate dehydrogenase	# of days 1 or 2	0.985611	0.000309086	0.344492	EC	***	1	0.712702	FALSE	FALSE	0.141383	0.416667	Positive
7.2.4.1:Carboxybiotin decarboxylase	1.5.1.2:Pyrroline-5-carboxylate reductase	Sleep	-0.985611	0.000309086	0.344492	EC	***	0.0625	0.169564	FALSE	FALSE	-0.27327	-1.5	Negative
Akkermansia_u_s	1.8.1.2:Assimilatory sulfite reductase (NADPH)	# of days 1 or 2	-0.985611	0.000309086	0.344492	EC	***	0.3125	0.712702	FALSE	FALSE	1.56556	0.416667	Negative
Bacteroides uniformis	10-formyltetrahydrofolate biosynthetic process	incomplete evacuation	0.985611	0.000309086	0.344492	GO	***	0.4375	0.0579073	FALSE	FALSE	0.169854	-2.83333	Positive
Bacteroides_u_s	2-dehydro-3-deoxy-6-phosphogalactonate aldolase activity	Sleep	0.985611	0.000309086	0.344492	GO	***	0.5625	0.169564	FALSE	FALSE	0.616438	-1.5	Positive
Blautia producta	2.1.1.130:Precorrin-2 C(20)-methyltransferase	incomplete evacuation	-0.985611	0.000309086	0.344492	EC	***	0.09375	0.0579073	FALSE	FALSE	-0.634154	-2.83333	Negative
CoA-disulfide reductase activity	2.1.1.192:23S rRNA (adenine(2503)-C(2))-methyltransferase	Sleep	-0.985611	0.000309086	0.344492	EC	***	0.09375	0.169564	FALSE	FALSE	-0.237302	-1.5	Negative
GH39	2.1.1.193:16S rRNA (uracil(1498)-N(3))-methyltransferase	Hyperactivity	-0.985611	0.000309086	0.344492	EC	***	0.03125	0.201243	TRUE	FALSE	-0.31149	-1.83333	Negative
GH73	2.1.1.193:16S rRNA (uracil(1498)-N(3))-methyltransferase	Flushing	-0.985611	0.000309086	0.344492	EC	***	0.03125	0.712702	TRUE	FALSE	-0.31149	-0.5	Negative
GH78	2.1.1.199:16S rRNA (cytosine(1402)-N(4))-methyltransferase	gas	0.985611	0.000309086	0.344492	EC	***	0.0625	0.0579073	FALSE	FALSE	-0.307119	-2.33333	Positive
L-glutamate transmembrane transport	2.1.1.264:23S rRNA (guanine(2069)-N(7))-methyltransferase	gas	0.985611	0.000309086	0.344492	EC	***	0.5625	0.0579073	FALSE	FALSE	-0.291545	-2.33333	Positive
S-adenosylmethionine-dependent methyltransferase activity	2.1.2.5:Glutamate formimidoyltransferase	# of days 1 or 2	0.985611	0.000309086	0.344492	EC	***	1	0.712702	FALSE	FALSE	-0.0290684	0.416667	Positive
arylsulfatase activity	2.1.3.9:N-acetylornithine carbamoyltransferase	# of days 1 or 2	0.985611	0.000309086	0.344492	EC	***	1	0.712702	FALSE	FALSE	-0.12574	0.416667	Positive
choline catabolic process	2.3.1.129:Acyl-[acyl-carrier-protein]--UDP-N-acetylglucosamine O-acyltransferase	# of days 1 or 2	0.985611	0.000309086	0.344492	EC	***	0.84375	0.712702	FALSE	FALSE	0.803125	0.416667	Positive
d__Bacteria.p__Bacteroidota.c__Bacteroidia.o__Bacteroidales.f__Bacteroidaceae.g__Bacteroides.__	2.3.1.19:Phosphate butyryltransferase	gas	-0.985611	0.000309086	0.344492	EC	***	0.3125	0.0579073	FALSE	FALSE	-1.41041	-2.33333	Negative
d__Bacteria.p__Firmicutes.c__Clostridia.o__Lachnospirales.f__Lachnospiraceae.g__Blautia.s__uncultured_Blautia	2.3.1.28:Chloramphenicol O-acetyltransferase	Sociability	-0.985611	0.000309086	0.344492	EC	***	0.84375	0.269294	FALSE	FALSE	0.148526	-1.66667	Negative
d__Bacteria.p__Firmicutes.c__Clostridia.o__Oscillospirales.f__Ruminococcaceae.g__Candidatus_Soleaferrea.s__Ruminococcaceae_bacterium	2.3.1.28:Chloramphenicol O-acetyltransferase	Anxiety	-0.985611	0.000309086	0.344492	EC	***	0.84375	0.201243	FALSE	FALSE	0.148526	-2	Negative
glutamate dehydrogenase (NAD+) activity	2.3.1.28:Chloramphenicol O-acetyltransferase	Sensory Sensitivity	-0.985611	0.000309086	0.344492	EC	***	0.84375	0.201243	FALSE	FALSE	0.148526	-1.66667	Negative
methionine-R-sulfoxide reductase activity	2.4.99.12:Lipid IV(A) 3-deoxy-D-manno-octulosonic acid transferase	# of days 1 or 2	0.985611	0.000309086	0.344492	EC	***	0.6875	0.712702	FALSE	FALSE	0.381925	0.416667	Positive
pyruvate dehydrogenase (quinone) activity	2.5.1.31:diphosphate specific)	Sociability	-0.985611	0.000309086	0.344492	EC	***	1	0.269294	FALSE	FALSE	-0.0501768	-1.66667	Negative
starch catabolic process	2.5.1.31:diphosphate specific)	Anxiety	-0.985611	0.000309086	0.344492	EC	***	1	0.201243	FALSE	FALSE	-0.0501768	-2	Negative
sulfite reductase (NADPH) activity	2.5.1.31:diphosphate specific)	Sensory Sensitivity	-0.985611	0.000309086	0.344492	EC	***	1	0.201243	FALSE	FALSE	-0.0501768	-1.66667	Negative
tetrahydrofolate interconversion	2.5.1.90:All-trans-octaprenyl-diphosphate synthase	# of days 1 or 2	0.985611	0.000309086	0.344492	EC	***	0.5625	0.712702	FALSE	FALSE	0.790919	0.416667	Positive
tryptophan synthase activity	2.7.1.148:4-(cytidine 5'-diphospho)-2-C-methyl-D-erythritol kinase	Eye Contact	-0.985611	0.000309086	0.344492	EC	***	0.03125	0.36131	TRUE	FALSE	-0.486029	-1	Negative
	2.7.1.69:2.7.1.208	gas	0.985611	0.000309086	0.344492	EC	***	0.5625	0.0579073	FALSE	FALSE	-0.340555	-2.33333	Positive
	2.7.11.33:[Pyruvate, water dikinase] kinase	# of days 1 or 2	-0.985611	0.000309086	0.344492	EC	***	0.3125	0.712702	FALSE	FALSE	-0.395223	0.416667	Negative
	2.7.4.28:([Pyruvate, water dikinase] phosphate) phosphotransferase	# of days 1 or 2	-0.985611	0.000309086	0.344492	EC	***	0.3125	0.712702	FALSE	FALSE	-0.395223	0.416667	Negative
	2.7.4.2:Phosphomevalonate kinase	Gross Motor Skills	-0.985611	0.000309086	0.344492	EC	***	0.15625	0.278517	FALSE	FALSE	1.73916	-1.66667	Negative
	2.7.7.27:Glucose-1-phosphate adenylyltransferase	# of days 1 or 2	-0.985611	0.000309086	0.344492	EC	***	0.0625	0.712702	FALSE	FALSE	-0.271186	0.416667	Negative
	2.7.7.85:Diadenylate cyclase	gas	0.985611	0.000309086	0.344492	EC	***	0.15625	0.0579073	FALSE	FALSE	-0.270097	-2.33333	Positive
	2.7.8.13:Phospho-N-acetylmuramoyl-pentapeptide-transferase	Sleep	-0.985611	0.000309086	0.344492	EC	***	0.03125	0.169564	TRUE	FALSE	-0.398276	-1.5	Negative
	2.8.1.13:tRNA-uridine 2-sulfurtransferase	gas	0.985611	0.000309086	0.344492	EC	***	0.3125	0.0579073	FALSE	FALSE	-0.214442	-2.33333	Positive
	3'-5' exonuclease activity	# of days 1 or 2	-0.985611	0.000309086	0.344492	GO	***	0.21875	0.712702	FALSE	FALSE	-0.169352	0.416667	Negative
	3.2.1.15:Endo-polygalacturonase	# of days 1 or 2	0.985611	0.000309086	0.344492	EC	***	0.5625	0.712702	FALSE	FALSE	0.812715	0.416667	Positive
	3.2.1.50:Alpha-N-acetylglucosaminidase	# of days 1 or 2	0.985611	0.000309086	0.344492	EC	***	0.84375	0.712702	FALSE	FALSE	-0.0565324	0.416667	Positive
	3.2.2.4:AMP nucleosidase	# of days 1 or 2	0.985611	0.000309086	0.344492	EC	***	0.21875	0.712702	FALSE	FALSE	1.40863	0.416667	Positive
	3.4.11.18:Methionyl aminopeptidase	# of days 1 or 2	-0.985611	0.000309086	0.344492	EC	***	0.15625	0.712702	FALSE	FALSE	-0.274291	0.416667	Negative
	3.4.17.14:Zinc D-Ala-D-Ala carboxypeptidase	incomplete evacuation	-0.985611	0.000309086	0.344492	EC	***	0.4375	0.0579073	FALSE	FALSE	0.668996	-2.83333	Negative
	3.4.24.71:Endothelin-converting enzyme 1	# of days 1 or 2	0.985611	0.000309086	0.344492	EC	***	0.84375	0.712702	FALSE	FALSE	-0.217582	0.416667	Positive
	3.5.1.100:(R)-amidase	# of days 1 or 2	0.985611	0.000309086	0.344492	EC	***	0.15625	0.712702	FALSE	FALSE	0.815098	0.416667	Positive
	3.5.1.1:Asparaginase	gas	-0.985611	0.000309086	0.344492	EC	***	0.4375	0.0579073	FALSE	FALSE	-0.318032	-2.33333	Negative
	3.6.1.41:Bis(5'-nucleosyl)-tetraphosphatase (symmetrical)	# of days 1 or 2	-0.985611	0.000309086	0.344492	EC	***	0.5625	0.712702	FALSE	FALSE	-0.00840129	0.416667	Negative
	3.6.3.54:Transferred entry 7.2.2.8	gas	0.985611	0.000309086	0.344492	EC	***	0.4375	0.0579073	FALSE	FALSE	0.0800636	-2.33333	Positive
	4.1.1.48:Indole-3-glycerol-phosphate synthase	Eye Contact	-0.985611	0.000309086	0.344492	EC	***	0.15625	0.36131	FALSE	FALSE	-0.392611	-1	Negative
	4.1.2.13:Fructose-bisphosphate aldolase	Hyperactivity	-0.985611	0.000309086	0.344492	EC	***	0.0625	0.201243	FALSE	FALSE	-0.253713	-1.83333	Negative
	4.1.2.13:Fructose-bisphosphate aldolase	Flushing	-0.985611	0.000309086	0.344492	EC	***	0.0625	0.712702	FALSE	FALSE	-0.253713	-0.5	Negative
	4.1.2.21:2-dehydro-3-deoxy-6-phosphogalactonate aldolase	Sleep	0.985611	0.000309086	0.344492	EC	***	0.5625	0.169564	FALSE	FALSE	0.529598	-1.5	Positive
	4.1.2.4:Deoxyribose-phosphate aldolase	gas	0.985611	0.000309086	0.344492	EC	***	1	0.0579073	FALSE	FALSE	-0.104731	-2.33333	Positive
	4.1.2.5:L-threonine aldolase	Sociability	0.985611	0.000309086	0.344492	EC	***	0.03125	0.269294	TRUE	FALSE	1.80026	-1.66667	Positive
	4.1.2.5:L-threonine aldolase	Anxiety	0.985611	0.000309086	0.344492	EC	***	0.03125	0.201243	TRUE	FALSE	1.80026	-2	Positive
	4.1.2.5:L-threonine aldolase	Sensory Sensitivity	0.985611	0.000309086	0.344492	EC	***	0.03125	0.201243	TRUE	FALSE	1.80026	-1.66667	Positive
	4.1.2.5:L-threonine aldolase	Gross Motor Skills	0.985611	0.000309086	0.344492	EC	***	0.03125	0.278517	TRUE	FALSE	1.80026	-1.66667	Positive
	4.1.3.27:Anthranilate synthase	Eye Contact	-0.985611	0.000309086	0.344492	EC	***	0.15625	0.36131	FALSE	FALSE	-0.288084	-1	Negative
	4.1.3.6:Citrate (pro-3S)-lyase	Sociability	-0.985611	0.000309086	0.344492	EC	***	0.3125	0.269294	FALSE	FALSE	0.408151	-1.66667	Negative
	4.1.3.6:Citrate (pro-3S)-lyase	Anxiety	-0.985611	0.000309086	0.344492	EC	***	0.3125	0.201243	FALSE	FALSE	0.408151	-2	Negative
	4.1.3.6:Citrate (pro-3S)-lyase	Sensory Sensitivity	-0.985611	0.000309086	0.344492	EC	***	0.3125	0.201243	FALSE	FALSE	0.408151	-1.66667	Negative
	4.1.3.6:Citrate (pro-3S)-lyase	Gross Motor Skills	-0.985611	0.000309086	0.344492	EC	***	0.3125	0.278517	FALSE	FALSE	0.408151	-1.66667	Negative
	4.2.1.1:Carbonic anhydrase	Eye Contact	-0.985611	0.000309086	0.344492	EC	***	0.15625	0.36131	FALSE	FALSE	-0.209496	-1	Negative
	4.2.1.20:Tryptophan synthase	Hyperactivity	-0.985611	0.000309086	0.344492	EC	***	0.09375	0.201243	FALSE	FALSE	-0.300415	-1.83333	Negative
	4.2.1.20:Tryptophan synthase	Flushing	-0.985611	0.000309086	0.344492	EC	***	0.09375	0.712702	FALSE	FALSE	-0.300415	-0.5	Negative
	4.2.1.44:Myo-inosose-2 dehydratase	Sleep	-0.985611	0.000309086	0.344492	EC	***	0.3125	0.169564	FALSE	FALSE	-0.384781	-1.5	Negative
	4.2.1.6:Galactonate dehydratase	incomplete evacuation	0.985611	0.000309086	0.344492	EC	***	0.03125	0.0579073	TRUE	FALSE	1.408	-2.83333	Positive
	4.3.2.2:Adenylosuccinate lyase	gas	0.985611	0.000309086	0.344492	EC	***	0.03125	0.0579073	TRUE	FALSE	-0.370552	-2.33333	Positive
	5'-deoxynucleotidase activity	Gross Motor Skills	-0.985611	0.000309086	0.344492	GO	***	0.5625	0.278517	FALSE	FALSE	0.600294	-1.66667	Negative
	5.1.3.8:N-acylglucosamine 2-epimerase	Sociability	0.985611	0.000309086	0.344492	EC	***	0.3125	0.269294	FALSE	FALSE	-1.20258	-1.66667	Positive
	5.1.3.8:N-acylglucosamine 2-epimerase	Anxiety	0.985611	0.000309086	0.344492	EC	***	0.3125	0.201243	FALSE	FALSE	-1.20258	-2	Positive
	5.1.3.8:N-acylglucosamine 2-epimerase	Sensory Sensitivity	0.985611	0.000309086	0.344492	EC	***	0.3125	0.201243	FALSE	FALSE	-1.20258	-1.66667	Positive
	5.1.3.8:N-acylglucosamine 2-epimerase	Gross Motor Skills	0.985611	0.000309086	0.344492	EC	***	0.3125	0.278517	FALSE	FALSE	-1.20258	-1.66667	Positive
	5.4.2.6:Beta-phosphoglucomutase	Hyperactivity	-0.985611	0.000309086	0.344492	EC	***	0.6875	0.201243	FALSE	FALSE	0.0813237	-1.83333	Negative
	5.4.2.6:Beta-phosphoglucomutase	Flushing	-0.985611	0.000309086	0.344492	EC	***	0.6875	0.712702	FALSE	FALSE	0.0813237	-0.5	Negative
	5.4.99.12:tRNA pseudouridine(38-40) synthase	Sleep	-0.985611	0.000309086	0.344492	EC	***	0.03125	0.169564	TRUE	FALSE	-0.338242	-1.5	Negative
	5.4.99.16:Maltose alpha-D-glucosyltransferase	Sleep	0.985611	0.000309086	0.344492	EC	***	0.4375	0.169564	FALSE	FALSE	-0.0973548	-1.5	Positive
	6.1.1.12:Aspartate--tRNA ligase	gas	0.985611	0.000309086	0.344492	EC	***	0.15625	0.0579073	FALSE	FALSE	-0.351849	-2.33333	Positive
	6.1.2.1:D-alanine--(R)-lactate ligase	gas	0.985611	0.000309086	0.344492	EC	***	1	0.0579073	FALSE	FALSE	0.257901	-2.33333	Positive
	6.3.2.6:Phosphoribosylaminoimidazolesuccinocarboxamide synthase	Hyperactivity	-0.985611	0.000309086	0.344492	EC	***	0.0625	0.201243	FALSE	FALSE	-0.32623	-1.83333	Negative
	6.3.2.6:Phosphoribosylaminoimidazolesuccinocarboxamide synthase	Flushing	-0.985611	0.000309086	0.344492	EC	***	0.0625	0.712702	FALSE	FALSE	-0.32623	-0.5	Negative
	7.2.1.1:NADH:ubiquinone reductase (Na(+)-transporting)	# of days 1 or 2	0.985611	0.000309086	0.344492	EC	***	0.84375	0.712702	FALSE	FALSE	0.415853	0.416667	Positive
	7.2.4.1:Carboxybiotin decarboxylase	gas	0.985611	0.000309086	0.344492	EC	***	0.4375	0.0579073	FALSE	FALSE	-0.0848045	-2.33333	Positive
	ATPase binding	# of days 1 or 2	0.985611	0.000309086	0.344492	GO	***	1	0.712702	FALSE	FALSE	0.0521308	0.416667	Positive
	Akkermansia_u_s	# of days 1 or 2	0.985611	0.000309086	0.344492	Shotgun_Bacteria	***	0.4375	0.712702	FALSE	FALSE	0.584988	0.416667	Positive
	Anaerostipes hadrus	gas	0.985611	0.000309086	0.344492	Shotgun_Bacteria	***	0.4375	0.0579073	FALSE	FALSE	-1.33973	-2.33333	Positive
	Anaerostipes_u_s	Sleep	-0.985611	0.000309086	0.344492	Shotgun_Bacteria	***	0.09375	0.169564	FALSE	FALSE	-1.27686	-1.5	Negative
	Bacteroides fragilis GENE IS942	Gross Motor Skills	0.985611	0.000309086	0.344492	Virulence	***	0.4375	0.278517	FALSE	FALSE	-0.269982	-1.66667	Positive
	Bacteroides fragilis GENE mobC	Hyperactivity	0.985611	0.000309086	0.344492	Virulence	***	0.5625	0.201243	FALSE	FALSE	0.494548	-1.83333	Positive
	Bacteroides fragilis GENE mobC	Flushing	0.985611	0.000309086	0.344492	Virulence	***	0.5625	0.712702	FALSE	FALSE	0.494548	-0.5	Positive
	Bacteroides fragilis GENE rteC	# of days 1 or 2	0.985611	0.000309086	0.344492	Virulence	***	0.21875	0.712702	FALSE	FALSE	-0.430996	0.416667	Positive
	Bacteroides fragilis GENE traB	incomplete evacuation	0.985611	0.000309086	0.344492	Virulence	***	1	0.0579073	FALSE	FALSE	1.30753	-2.83333	Positive
	Bacteroides stercoris	Eye Contact	0.985611	0.000309086	0.344492	Shotgun_Bacteria	***	1	0.36131	FALSE	FALSE	1.21602	-1	Positive
	Bacteroides thetaiotaomicron GeneID BTV0320	Hyperactivity	0.985611	0.000309086	0.344492	Virulence	***	0.0625	0.201243	FALSE	FALSE	-0.402245	-1.83333	Positive
	Bacteroides thetaiotaomicron GeneID BTV0320	Flushing	0.985611	0.000309086	0.344492	Virulence	***	0.0625	0.712702	FALSE	FALSE	-0.402245	-0.5	Positive
	Bacteroides uniformis	# of days 1 or 2	0.985611	0.000309086	0.344492	Shotgun_Bacteria	***	0.84375	0.712702	FALSE	FALSE	-0.243172	0.416667	Positive
	Bacteroides_u_s	# of days 1 or 2	0.985611	0.000309086	0.344492	Shotgun_Bacteria	***	0.5625	0.712702	FALSE	FALSE	0.39048	0.416667	Positive
	Blautia producta	Eye Contact	-0.985611	0.000309086	0.344492	Shotgun_Bacteria	***	0.0625	0.36131	FALSE	FALSE	-1.64554	-1	Negative
	CBM20	gas	0.985611	0.000309086	0.344492	CAZy	***	0.84375	0.0579073	FALSE	FALSE	-0.0231437	-2.33333	Positive
	CoA-disulfide reductase activity	incomplete evacuation	-0.985611	0.000309086	0.344492	GO	***	0.21875	0.0579073	FALSE	FALSE	0.142767	-2.83333	Negative
	Cystobasidium_slooffiae	Gross Motor Skills	-0.985611	0.000309086	0.344492	ITS_Fungi	***	0.21875	0.278517	FALSE	FALSE	-0.681352	-1.66667	Negative
	Cystofilobasidium_macerans	Sleep	0.985611	0.000309086	0.344492	ITS_Fungi	***	0.0625	0.169564	FALSE	FALSE	-0.901711	-1.5	Positive
	D-amino acid catabolic process	Eye Contact	-0.985611	0.000309086	0.344492	GO	***	0.09375	0.36131	FALSE	FALSE	-0.362974	-1	Negative
	D-glucosamine PTS permease activity	gas	0.985611	0.000309086	0.344492	GO	***	0.6875	0.0579073	FALSE	FALSE	-0.252404	-2.33333	Positive
	D-proline reductase (dithiol) activity	Sleep	-0.985611	0.000309086	0.344492	GO	***	0.15625	0.169564	FALSE	FALSE	1.75783	-1.5	Negative
	D-ribose metabolic process	Eye Contact	-0.985611	0.000309086	0.344492	GO	***	0.6875	0.36131	FALSE	FALSE	0.626571	-1	Negative
	D-threo-aldose 1-dehydrogenase activity	# of days 1 or 2	0.985611	0.000309086	0.344492	GO	***	0.84375	0.712702	FALSE	FALSE	0.299316	0.416667	Positive
	Eggerthella sinensis	Sociability	-0.985611	0.000309086	0.344492	Shotgun_Bacteria	***	0.5625	0.269294	FALSE	FALSE	-0.18594	-1.66667	Negative
	Eggerthella sinensis	Anxiety	-0.985611	0.000309086	0.344492	Shotgun_Bacteria	***	0.5625	0.201243	FALSE	FALSE	-0.18594	-2	Negative
	Eggerthella sinensis	Sensory Sensitivity	-0.985611	0.000309086	0.344492	Shotgun_Bacteria	***	0.5625	0.201243	FALSE	FALSE	-0.18594	-1.66667	Negative
	Eggerthella sinensis	Gross Motor Skills	-0.985611	0.000309086	0.344492	Shotgun_Bacteria	***	0.5625	0.278517	FALSE	FALSE	-0.18594	-1.66667	Negative
	Enterobacteria phage HK225_u_t	Hyperactivity	-0.985611	0.000309086	0.344492	Phage	***	0.84375	0.201243	FALSE	FALSE	-0.0397756	-1.83333	Negative
	Enterobacteria phage HK225_u_t	Flushing	-0.985611	0.000309086	0.344492	Phage	***	0.84375	0.712702	FALSE	FALSE	-0.0397756	-0.5	Negative
	Erysipelotrichaceae_u_s	Eye Contact	-0.985611	0.000309086	0.344492	Shotgun_Bacteria	***	0.4375	0.36131	FALSE	FALSE	0.622035	-1	Negative
	Escherichia coli GENE tnpA	Eye Contact	-0.985611	0.000309086	0.344492	Virulence	***	1	0.36131	FALSE	FALSE	0.194155	-1	Negative
	Escherichia virus P1	Hyperactivity	-0.985611	0.000309086	0.344492	Phage	***	0.5625	0.201243	FALSE	FALSE	1.54121	-1.83333	Negative
	Escherichia virus P1	Flushing	-0.985611	0.000309086	0.344492	Phage	***	0.5625	0.712702	FALSE	FALSE	1.54121	-0.5	Negative
	Fournierella massiliensis	Sociability	-0.985611	0.000309086	0.344492	Shotgun_Bacteria	***	0.03125	0.269294	TRUE	FALSE	-1.20603	-1.66667	Negative
	Fournierella massiliensis	Anxiety	-0.985611	0.000309086	0.344492	Shotgun_Bacteria	***	0.03125	0.201243	TRUE	FALSE	-1.20603	-2	Negative
	Fournierella massiliensis	Sensory Sensitivity	-0.985611	0.000309086	0.344492	Shotgun_Bacteria	***	0.03125	0.201243	TRUE	FALSE	-1.20603	-1.66667	Negative
	Fusicolla_acetilerea	gas	0.985611	0.000309086	0.344492	ITS_Fungi	***	0.6875	0.0579073	FALSE	FALSE	-0.0495366	-2.33333	Positive
	GH1	# of days 1 or 2	-0.985611	0.000309086	0.344492	CAZy	***	0.84375	0.712702	FALSE	FALSE	-0.283448	0.416667	Negative
	GH113	Sleep	0.985611	0.000309086	0.344492	CAZy	***	1	0.169564	FALSE	FALSE	-0.00776204	-1.5	Positive
	GH39	Hyperactivity	-0.985611	0.000309086	0.344492	CAZy	***	0.15625	0.201243	FALSE	FALSE	-1.18219	-1.83333	Negative
	GH39	Flushing	-0.985611	0.000309086	0.344492	CAZy	***	0.15625	0.712702	FALSE	FALSE	-1.18219	-0.5	Negative
	GH73	gas	0.985611	0.000309086	0.344492	CAZy	***	0.15625	0.0579073	FALSE	FALSE	-0.557667	-2.33333	Positive
	GH78	gas	0.985611	0.000309086	0.344492	CAZy	***	0.4375	0.0579073	FALSE	FALSE	0.834742	-2.33333	Positive
	GPI anchor biosynthetic process	Eye Contact	0.985611	0.000309086	0.344492	GO	***	0.4375	0.36131	FALSE	FALSE	-1.24518	-1	Positive
	Gly-tRNA(Ala) hydrolase activity	Eye Contact	-0.985611	0.000309086	0.344492	GO	***	0.09375	0.36131	FALSE	FALSE	-0.362974	-1	Negative
	Holtermanniella_takashimae	Hyperactivity	-0.985611	0.000309086	0.344492	ITS_Fungi	***	0.4375	0.201243	FALSE	FALSE	-0.419192	-1.83333	Negative
	Holtermanniella_takashimae	Flushing	-0.985611	0.000309086	0.344492	ITS_Fungi	***	0.4375	0.712702	FALSE	FALSE	-0.419192	-0.5	Negative
	L-glutamate transmembrane transport	incomplete evacuation	-0.985611	0.000309086	0.344492	GO	***	0.4375	0.0579073	FALSE	FALSE	0.255969	-2.83333	Negative
	Lactococcus phage BK5-T_u_t	incomplete evacuation	0.985611	0.000309086	0.344492	Phage	***	0.4375	0.0579073	FALSE	FALSE	1.12607	-2.83333	Positive
	Massilicoli timonensis	Eye Contact	-0.985611	0.000309086	0.344492	Shotgun_Bacteria	***	1	0.36131	FALSE	FALSE	-0.165051	-1	Negative
	N-acetylmannosamine metabolic process	gas	0.985611	0.000309086	0.344492	GO	***	0.6875	0.0579073	FALSE	FALSE	0.794118	-2.33333	Positive
	N-acetylornithine carbamoyltransferase activity	# of days 1 or 2	0.985611	0.000309086	0.344492	GO	***	1	0.712702	FALSE	FALSE	-0.0688431	0.416667	Positive
	N-acylglucosamine 2-epimerase activity	Sociability	0.985611	0.000309086	0.344492	GO	***	0.4375	0.269294	FALSE	FALSE	-1.14047	-1.66667	Positive
	N-acylglucosamine 2-epimerase activity	Anxiety	0.985611	0.000309086	0.344492	GO	***	0.4375	0.201243	FALSE	FALSE	-1.14047	-2	Positive
	N-acylglucosamine 2-epimerase activity	Sensory Sensitivity	0.985611	0.000309086	0.344492	GO	***	0.4375	0.201243	FALSE	FALSE	-1.14047	-1.66667	Positive
	N-acylglucosamine 2-epimerase activity	Gross Motor Skills	0.985611	0.000309086	0.344492	GO	***	0.4375	0.278517	FALSE	FALSE	-1.14047	-1.66667	Positive
	NAD binding	# of days 1 or 2	-0.985611	0.000309086	0.344492	GO	***	0.03125	0.712702	TRUE	FALSE	-0.287969	0.416667	Negative
	NADH dehydrogenase complex	# of days 1 or 2	0.985611	0.000309086	0.344492	GO	***	0.84375	0.712702	FALSE	FALSE	0.0925953	0.416667	Positive
	PF00004:ATPase family associated with various cellular activities (AAA)	# of days 1 or 2	-0.985611	0.000309086	0.344492	PFAM	***	0.6875	0.712702	FALSE	FALSE	-0.0820212	0.416667	Negative
	PF00027:Cyclic nucleotide-binding domain	gas	0.985611	0.000309086	0.344492	PFAM	***	0.84375	0.0579073	FALSE	FALSE	-0.0184228	-2.33333	Positive
	PF00037:4Fe-4S binding domain	# of days 1 or 2	-0.985611	0.000309086	0.344492	PFAM	***	0.3125	0.712702	FALSE	FALSE	-0.180401	0.416667	Negative
	PF00070:Pyridine nucleotide-disulphide oxidoreductase	incomplete evacuation	0.985611	0.000309086	0.344492	PFAM	***	0.09375	0.0579073	FALSE	FALSE	-0.39564	-2.83333	Positive
	PF00076:RNA recognition motif. (a.k.a. RRM, RBD, or RNP domain)	# of days 1 or 2	0.985611	0.000309086	0.344492	PFAM	***	0.6875	0.712702	FALSE	FALSE	-0.301265	0.416667	Positive
	Proteus mirabilis GENE tnpA	Sleep	-0.985611	0.000309086	0.344492	Virulence	***	0.21875	0.169564	FALSE	FALSE	1.73665	-1.5	Negative
[truncated: 165 more rows]

## Sheet: phage_BaselineVsTD
Feature	Mann-Whitney U	p-value	RankBiserial_r	RankBiserial_r_abs	EnrichedCohort
[truncated: 118 more rows]

## Sheet: SCFA
	Raw SCFAs data														Statsitical analysis results
[truncated: 40 more rows]

[truncated: 6 more sheets: Pfam_BaselineVsTD, Correlation_BaselineVsEndMT, EC_BaselineVsTD_shotgun, AMR_BaselineVsTD_shotgun, virulence_BaselineVsTD_shotgun, CAZy_BaselineVsTD_shotgun]
